# Supplementary material
Source: PubMed Central journal article supplement (PMC10586707)
Supplement: NIHMS1893288-supplement-Supplemental_Information.pdf [file NIHMS1893288-supplement-Supplemental_Information.pdf]

## Supporting Information

### ***Radical Termination via $\beta$ -Scission Enables a Photoenzymatic Allylic Alkylation Using 'Ene'-Reductases***

Netgie Laguerre<sup>‡</sup>, Paul S. Riehl<sup>‡</sup>, Daniel G. Oblinsky, Megan A. Emmanuel, Michael J. Black,  
Gregory D. Scholes, Todd K. Hyster\*

Department of Chemistry, Princeton University, Princeton, New Jersey 08544, United States

Department of Chemistry and Chemical Biology, Cornell University, Ithaca, New York 14850, United States

\*Corresponding Author Email: [thyster@cornell.edu](mailto:thyster@cornell.edu)

## Contents

|                                                                          |    |
|--------------------------------------------------------------------------|----|
| Experimental Procedures .....                                            | 3  |
| General .....                                                            | 3  |
| Light Sources.....                                                       | 3  |
| Protein Expression and purification .....                                | 3  |
| Sequence Information .....                                               | 5  |
| GluER-wild type (“WT”).....                                              | 5  |
| GluER-T36A (“T36A”).....                                                 | 5  |
| GluER-T36A-K317M-Y343F (“G6”).....                                       | 6  |
| Reaction Optimization .....                                              | 8  |
| Mechanistic Investigation .....                                          | 13 |
| Transient Absorption Studies .....                                       | 13 |
| Charge-Transfer Complex.....                                             | 19 |
| General Procedures for Substrate Synthesis .....                         | 22 |
| Synthesis of Unsubstituted Allylsilane Substrates .....                  | 22 |
| Synthesis of Trisubstituted Substrates.....                              | 24 |
| Synthesis of Aryl-Substituted 6-membered substrate .....                 | 37 |
| Biocatalytic Reaction .....                                              | 39 |
| Preparation of Racemic Product Standards.....                            | 47 |
| Synthesis of Unsubstituted and Alkyl-Substituted Racemic Standards ..... | 47 |
| Synthesis of Aryl-Substituted Product Standards .....                    | 48 |
| Chiral HPLC Traces of Products .....                                     | 54 |
| <sup>1</sup> H and <sup>13</sup> C NMR of Substrates and Products.....   | 67 |

## **Experimental Procedures**

**General.** Unless otherwise noted, all chemicals and reagents for chemical reactions were obtained from commercial suppliers and used as received (Sigma-Aldrich, Oakwood Chemical, Combi-Blocks, TCI, Acros, and VWR). GDH-105 was purchased as cell-free lysate from Codexis and was used as received. Silica gel chromatography purifications were carried out using AMD Silica Gel 60 on a Biotage Isolera One automated flash chromatography system.  $^1\text{H}$  and  $^{13}\text{C}$  NMR spectra were recorded on Bruker UltraShield Plus 500 MHz, Bruker 400 MHz, Bruker 500 MHz, or a Varian 600 MHz instruments, and are internally referenced to residual proton and carbon signals in  $\text{CDCl}_3$  (7.26 ppm and 77.16 ppm, respectively).  $^1\text{H}$  NMR data are reported as follows: chemical shift ( $\delta$  ppm), multiplicity (s = singlet, brs = broad singlet, d = doublet, t = triplet, q = quartet, m = multiplet, dd = doublet of doublet, dt = doublet of triplet, ddd = doublet of doublet of doublet), coupling constant (Hz), and integration. Data for  $^{13}\text{C}$  NMR are reported in terms of chemical shift. High resolution mass spectra (HRMS) were obtained on a Thermo Fisher Scientific Exactive series DART Mass Spectrometer. IR spectra were recorded on a Thermo Scientific Nicolet iS50 FTIR spectrometer and peaks are reported in terms of frequency of absorption ( $\text{cm}^{-1}$ ). Chromatography. Analytical high performance liquid chromatography (HPLC) was carried out using an Agilent 1260 Infinity HPLC System. Enantiomeric ratios (e.r.) were determined by chiral GC analysis on a Hewlett Packard 6890 gas chromatograph equipped with an Astec CHIRALDEX A-TA column.

**Light Sources.** The cyan LEDs lamps were constructed in-house from Chanzon High Power 50W Cyan LED Chips (497nm / 1500mA / DC30-34V / 50W) (Amazon 1DGL-JC-50W-490) powered by Mean Well HLG-320H-C1750A power supplies (320W / 183V / 1750 mA) by wiring four LED Chips in series. Each LED chip was secured to a Nagulagu cooling aluminum LED heatsink equipped with a 12V fan (Amazon B01K1Z6VP6). Blue (456 nm; PR160L-456) and violet (390 nm; PR160L-390) Kessil lamps were used for blue and violet light irradiation in evaluating different color light sources. Violet irradiation for racemic standards was achieved using an air-cooled 96-LED lumidox II array (415 nm; LUM96-415UV) equipped with a 24-vial metal block.

**Protein Expression and purification.** Enzymes were produced in BL21(DE3) *E. coli* transformed with plasmids encoding each of the 'ene'-reductase variants from pre-existing glycerol stocks in our laboratory. Mutants were expressed identically to *wild-type*. Glycerol stocks of BL21(DE3) *E. coli* transformed with plasmids encoding ERED enzymes were used to initiate a 10 mL overnight culture in LB media with 100  $\mu\text{g/mL}$  ampicillin (37 °C, 250 rpm). Auto-Inducing Turbo Broth<sup>TM</sup> media (500 mL in 2 L flask) containing 100  $\mu\text{g/mL}$  ampicillin was inoculated with 1 mL of the overnight culture and grown for 24 hours (30 °C, 250 rpm). After expression cells were harvested by centrifugation (4000 x g, 20 min, 4 °C) and frozen at -20 °C for later purification. Frozen cells were thawed on ice and resuspended in buffer A (50 mM TEOA pH 7, 25 mM imidazole) to a final concentration of 2 mL/g of cells. The resuspended cells were treated with lysozyme (1mg/mL), FMN (1mg/mL), DNase (0.1 mg/mL), PMSF (1mM) and allowed to shake for 1 hour at 25 °C. The cells were further disrupted by sonication (2 x 4 min, output control 5, 35% duty cycle; Sonicator QSonica Q500 Ultra Sonicator). To pellet insoluble material, lysates were centrifuged (20,000 x g, 1.5 hours, 4 °C). Proteins were purified using a nickel-NTA column (5 mL HisTrap HP, GE Healthcare, Piscataway, NJ) using an AKTASart purifier FPLC system (GE Healthcare). Enzymes were eluted with 100 % buffer B (50 mM TEOA pH 7, 250 mM imidazole. Storage buffer 50 mM TEOA pH 7) over five

column volumes. Yellow fractions containing 'ene'-reductase enzymes were pooled, concentrated, and subjected to three buffer exchanges into an imidazole free storage buffer. Concentrated enzymes (1-4 mM measured by UV-vis spectroscopy at 464 nm; extinction coefficient =  $\epsilon_{464} = 11.4 \times 10^3 \text{ M}^{-1} \text{ cm}^{-1}$ ) were portioned into 100 or 500 nmol aliquots, flash frozen in liquid nitrogen, and stored at -20 °C until later use.

## **Sequence Information**

### **GluER-wild type (“WT”)**

#### DNA Sequence:

ATGCCGACCCTTTTCGACCCCATCGATTTTCGGACCTATCCACGCCAAGAATCGTATC  
GTCATGTCCCCCCTGACTCGCGGTCGCGCTGACAAAGAGGCGGTTCCAACCCCAT  
TATGGCTGAATACTACGCCCAACGCGCTTCGGCGGGTTTAATTATCACTGAAGCGA  
CGGGGATTTACGCGGAAGGCTTAGGTTGGCCGTTTGCGCCGGGAATTTGGTCCGAT  
GCACAGGTTGAGGCGTGGAACCTATCGTCGCGGGTGTCCATGCAAAGGGCGGCA  
AGATCGTATGTCAGCTTTGGCATATGGGCCGTATGGTACATTCTTCAGTTACAGGGA  
CGCAGCCCGTAAGCAGTTCCGCCACTACTGCTCCAGGTGAGGTTACACACCTATGAG  
GGCAAGAAGCCCTTCGAACAAGCGCGTGCAATCGATGCTGCAGACATCTCCCGCA  
TCCTTAACGATTACGAAAATGCAGCACGTAATGCAATCCGCGCGGGTTTCGATGGA  
GTGCAGATCCACGCAGCCAATGGCTACCTTATCGATGAGTTTTTGCGTAACGGAAC  
CAATCATCGCACCGATGAGTATGGGGGGGTGCCGGAGAACCGTATTCGTTTCTTGA  
AAGAGGTAACAGAACGCGTCATCGCGGCGATTGGCGCTGACCGTACGGGTGTGCG  
TCTGAGTCCAAACGGTGACACACAGGGTTGTATCGACAGTGCTCCCGAAACCGTTT  
TTGTTCTGCGCAAAGCTTTTGCAAGATTTAGGGGTAGCGTGGCTTGAGCTGCGT  
GAACCTGGTCCGAATGGTACGTTTGGAAAGACGGATCAACCAAATTATCTCCACA  
AATCCGTAAGGTATTCCTTCGTCCATTGGTCTTAAATCAAGACTATACTTTTGAGGCG  
GCACAGACGGCCCTGGCTGAGGGCAAGGCGGACGCTATTGCGTTTGGCCGTAAGT  
TCATTTCAAATCCAGACTTGCCTGAGCGCTTTGCCCGTGGCATCGCACTGCAACCAG  
ACGATATGAAAACATGGTACTCCCAAGGCCAGAGGGTTACACAGACTATCCATCC  
GCAACTTCTGGGCCGAACTGA

#### Amino Acid Sequence:

MPTLFDPIDFGPIHAKNRIVMSPLTRGRADKEAVPTPIMAEYYAQRASAGLIIT  
EATGISREGLGWPFAPGIWSDAQVEAWKPIVAGVHAKGGKIVCQLWHMGRMVHSSVT  
GTQPVSSSATAPGEVHTYEGKKPFEQARAIDAADISRLNDYENAARNAIRAGFDGVQI  
HAANGYLIDEFLRNGTNHRTDEYGGVPENRIRFLKEVTERVIAAIGADRTGVRLSPNGD  
TQGCIDSAPETVVFVPAAKLLQDLGVAWLELREPGPNGTFGKTDQPKLSPQIRKVFLRPL  
VLNQDYTFEAAQTALAEGKADAI AFGRKFISNPDLPERFARGIALQPDDMKTWYSQGP  
EGYTDYPSATSGPN

### **GluER-T36A (“T36A”)**

#### DNA Sequence:

ATGCCGACCCTTTTCGACCCCATCGATTTTCGGACCTATCCACGCCAAGAATCGTATC  
GTCATGTCCCCCCTGACTCGCGGTCGCGCTGACAAAGAGGCGGTTCCAGCTCCCAT  
TATGGCTGAATACTACGCCCAACGCGCTTCGGCGGGTTTAATTATCACTGAAGCGA  
CGGGGATTTACGCGGAAGGCTTAGGTTGGCCGTTTGCGCCGGGAATTTGGTCCGAT  
GCACAGGTTGAGGCGTGGAACCTATCGTCGCGGGTGTCCATGCAAAGGGCGGCA  
AGATCGTATGTCAGCTTTGGCATATGGGCCGTATGGTACATTCTTCAGTTACAGGGA  
CGCAGCCCGTAAGCAGTTCCGCCACTACTGCTCCAGGTGAGGTTACACACCTATGAG  
GGCAAGAAGCCCTTCGAACAAGCGCGTGCAATCGATGCTGCAGACATCTCCCGCA

TCCTTAACGATTACGAAAATGCAGCACGTAATGCAATCCGCGCGGGTTTCGATGGA  
GTGCAGATCCACGCAGCCAATGGCTACCTTATCGATGAGTTTTTTCGTAACGGAAC  
CAATCATCGCACCGATGAGTATGGGGGGGTGCCGGAGAACCGTATTCGTTTCTTGA  
AAGAGGTAACAGAACGCGTCATCGCGGCGATTGGCGCTGACCGTACGGGTGTGCG  
TCTGAGTCCAAACGGTGACACACAGGGTTGTATCGACAGTGCTCCCGAAACCGTTT  
TTGTTCTGCGCAAAGCTTTTGCAAGATTTAGGGGTAGCGTGGCTTGAGCTGCGT  
GAACCTGGTCCGAATGGTACGTTTGGAAGACGGATCAACCAAAATTATCTCCACA  
AATCCGTAAGGTATTCCTTCGTCCATTGGTCTTAAATCAAGACTATACTTTTGAGGCG  
GCACAGACGGCCCTGGCTGAGGGCAAGGCGGACGCTATTGCGTTTGGCCGTAAGT  
TCATTTCAAATCCAGACTTGCCTGAGCGCTTTGCCCGTGGCATCGCACTGCAACCAG  
ACGATATGAAAACATGGTACTCCCAAGGCCAGAGGGTTACACAGACTATCCATCC  
GCAACTTCTGGGCCGAACAAT

**Amino Acid Sequence:**

MPTLFDPIDFGPIHAKNRIVMSPLTRGRADKEAVPAPIMAEYYAQRASAGLIITEATGISR  
EGLGWPFAPGIWSDAQVEAWKPIVAGVHAKGGKIVCQLWHMGRMVHSSVTGTQPVSS  
SATTAPGEVHTYEGKKPFEQARAIDAADISRLNDYENAARNAIRAGFDGVQIHAANGY  
LIDEFLRNGTNHRTDEYGGVPENRIRFLKEVTERVIAAIGADRTGVRLSPNGDTQGCIDS  
APETVFVPAAKLLQDLGVAWLELREPGPNGTFGKTDQPKLSPQIRKVFLRPLVLNQDYT  
FEAAQTALAEKADAIAFGRKFISNPDLPERFARGIALQPDDMKTWYSQGPEGYTDYPS  
ATSGPNN

**GluER-T36A-K317M-Y343F (“G6”)**

**DNA Sequence:**

GAGTAATTCCCTCTGAATATTTTGTCTTACTTTAAGAAGGAGATATACCATGGGCAGC  
AGCCATCATCATCATCACAGCAGCGGCCTGGTGCCGCGCGGCAGCCATATGCC  
GACCCTTTTCGACCCCATCGATTTCGGACCTATCCACGCCAAGAATCGTATCGTCAT  
GTCCCCCTGACTCGCGGTCGCGCTGACAAAGAGGCGGTTCCAGCCCCCATTATGGC  
TGAATACTACGCCCAACGCGCTTCGGCGGGTTTAATTATCACTGAAGCGACGGGGAT  
TTCACGCGAAGGCTTAGGTTGGCCGTTTGCGCCGGGGATTTGGTCCGATGCACAGGT  
TGAGGCGTGGAACCTATCGTCGCGGGTGTCCATGCAAAGGGCGGCAAGATCGTAT  
GTCAGCTTTGGCATATGGGCCGTATGGTACATTCTTCAGTTACAGGGACGCAGCCCG  
TAAGCAGTTCCGCCACTACTGCTCCAGGTGAGGTTACACCTATGAGGGCAAGAAG  
CCCTTCGAACAAGCGCGTGCAATCGATGCTGCAGACATCTCCCGCATCCTTAACGAT  
TACGAAAATGCAGCACGTAATGCAATCCGCGCGGGTTTCGATGGAGTGCAGATCCA  
CGCAGCCAATGGCTACCTTATCGATGAGTTTTTTCGTAACGGAACCAATCATCGCAC  
CGATGAGTATGGGGGGGTGCCGGAGAACCGTATTCGTTTCTTGAAAGAGGTAACAG  
AACGCGTCATCGCGGCGATTGGCGCTGACCGTACGGGTGTGCGTCTGAGTCCAAAC  
GGTGACACACAGGGTTGTATCGACAGTGCTCCCGAAACCGTTTTTGTTCCTGCCGCA  
AAGCTTTTGCAAGATTTAGGGGTAGCGTGGCTTGAGCTGCGTGAACCTGGTCCGAAT  
GGTACGTTTGGAAGACGGATCAACCAAAATTATCTCCACAAATCCGTAAGGTATTC  
CTTCGTCCATTGGTCTTAAATCAAGACTATACTTTTGAGGCCGCACAGACGGCCCTG  
GCTGAGGGCAAGGCGGACGCTATTGCGTTTGGCCGTATGTTCAATTTCAAATCCAGAC  
TTGCTGAGCGCTTTGCCCGTGGCATCGCACTGCAACCAGACGATATGAAAACATGG

TTCTCCCAAGGCCAGAGGGTTACACAGACTATCCATCCGCAACTTCTGGGCCGAAC  
TGACTTGAGATCCGGCTGCNACAAAGCCCNAAGGAAGTN

Amino Acid Sequence:

MGSSHHHHHSSGLVPRGSHMPTLFDPIDFGPIHAKNRIVMSPLTRGRADKEAVPAPIM  
AEYYAQRASAGLIITEATGISREGLGWPFAPGIWSDAQVEAWKPIVAGVHAKGGKIVCQ  
LWHMGRMVHSSVTGTQPVSSSATTAPGEVHTYEGKKPFEQARAIDAADISRILNDYENA  
ARNAIRAGFDGVQIHAANGYLIDEFLRNGTNHRTDEYGGVPENRIRFLKEVTERVIAAIG  
ADRTGVRLSPNGDTQGCIDSAPETVFPAAKLLQDLGVAWLELREPGPNGTFGKTDQP  
KLSPQIRKVFLRPLVLNQDYTFEAAQTALAEGKADAIAFGRMFISNPDLPERFARGIALQ  
PDDMKTWFSQGPEGYTDYPSATSGPN

## Reaction Optimization

**General Procedure for reaction optimization experiments:** For each reaction, 3.1 mg of substrate **1** (10  $\mu\text{mol}$ , 1 equiv.) was weighed into a shell vial and imported into a Coy anaerobic chamber. Inside the anaerobic chamber, a 10x stock solution of “turnover mix” was prepared by dissolving GDH-105 (3 mg, 10 wt%/rxn),  $\text{NADP}^+$  (2 mg, 2 mol%/rxn) and glucose (108 mg, 6 equiv./rxn) in 1 mL of 100 mM buffer. 100  $\mu\text{L}$  of this solution was transferred to a shell vial equipped with a cross stir bar and diluted with 100 mM buffer (365  $\mu\text{L}$ ). A 100 nmol aliquot of GluER enzyme (33  $\mu\text{L}^*$ ) was added and the mixture was gently vortexed until the yellow color faded and the mixture became clear. Substrate **1** was dissolved in co-solvent (30  $\mu\text{L}$ ) and transferred via pipette to the reaction mixture. The substrate vial was rinsed with an additional 30  $\mu\text{L}$  of co-solvent that was then transferred to the reaction mixture. The vial was capped with a septum, removed from the anaerobic chamber, and irradiated with cyan LEDs at room temperature for 48 hours. At this time, the reaction mixture was removed from the light source and diluted with 2 mL of MeCN containing 0.5 mg/mL 1,3,5-trimethoxybenzene (TMB) and stirred 30-60 minutes at room temperature. The reaction was further diluted with 1.44 mL of water to a final volume of 4 mL. Insoluble protein components were removed by centrifuging the vials in a Genevac and filtering a portion of the mixture through a cotton plug directly into an HPLC vial. Yields were calculated based on the ratio of product to TMB. The contents of the HPLC vial were then combined into the total reaction mixture and the mixtures were extracted three times with EtOAc. The combined organic layers were concentrated by Genevac and redissolved in 20% isopropanol in hexane for analysis by chiral HPLC.

\*If a larger volume aliquot of enzyme was used, the amount of buffer used to dilute the turnover mix was decreased by a corresponding amount. The total reaction volume adds to 558  $\mu\text{L}$ .

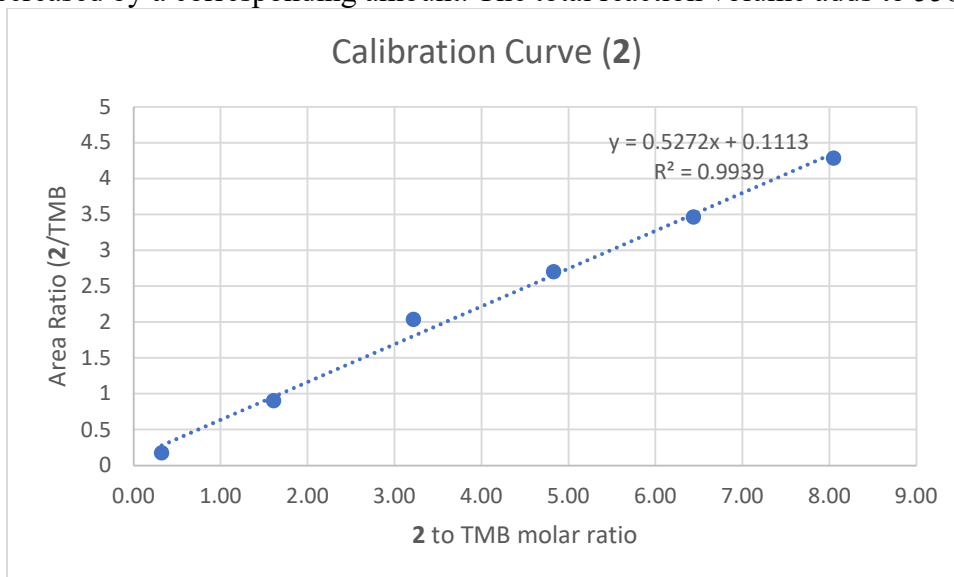

**Figure SI-1.** Calibration curve for product **2**.

**Table SI-1:** Evaluation of GluER variants.

| <div><div>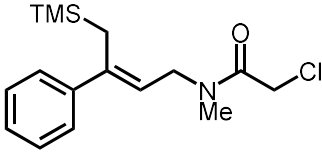</div><div><p><b>GluER Variant</b> (1 mol%)<br/>NADP<sup>+</sup>, GDH, glucose</p><p>100 mM TEOA pH = 8<br/>10% v/v DMSO<br/>Cyan LEDs</p></div><div>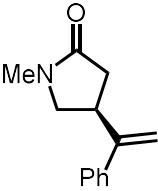</div></div> |                |       |
|-------------------------------------------------------------------------------------------------------------------------------------------------------------------------------------------------------------------------------------------------------------------------------------------------------------------------------------------------|----------------|-------|
| GluER Variant                                                                                                                                                                                                                                                                                                                                   | % yield (HPLC) | e.r.  |
| GluER-WT                                                                                                                                                                                                                                                                                                                                        | 77             | >99:1 |
| GluER-T36A                                                                                                                                                                                                                                                                                                                                      | 64             | >99:1 |
| GluER-T36A-K317M-Y343F (G6)                                                                                                                                                                                                                                                                                                                     | 79             | >99:1 |

**Table SI-2:** Evaluation of reaction buffers.

| <div><div>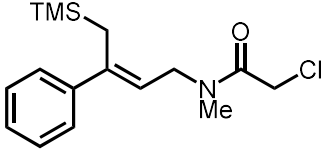</div><div><p>GluER-G6 (1 mol%)<br/>NADP<sup>+</sup>, GDH, glucose</p><p><b>Buffer (100 mM pH = 8)</b><br/>10% v/v DMSO<br/>Cyan LEDs</p></div><div>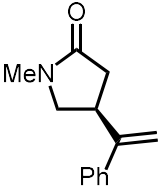</div></div> |                |       |
|--------------------------------------------------------------------------------------------------------------------------------------------------------------------------------------------------------------------------------------------------------------------------------------------------------------------------------------------------|----------------|-------|
| Buffer                                                                                                                                                                                                                                                                                                                                           | % yield (HPLC) | e.r.  |
| KP <sub>i</sub>                                                                                                                                                                                                                                                                                                                                  | 56             | >99:1 |
| Tricine                                                                                                                                                                                                                                                                                                                                          | 78             | >99:1 |
| TRIS                                                                                                                                                                                                                                                                                                                                             | 69             | >99:1 |
| TEOA                                                                                                                                                                                                                                                                                                                                             | 79             | >99:1 |

**Table SI-3:** Evaluation of organic co-solvents.

| <div><div>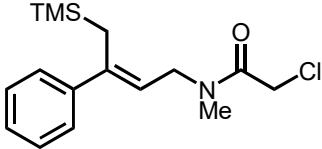</div><div><div>GluER-G6 (1 mol%)<br/>NADP<sup>+</sup>, GDH, glucose</div><div>TEOA (100 mM pH = 8)<br/><b>10% v/v Solvent</b><br/>Cyan LEDs</div></div><div>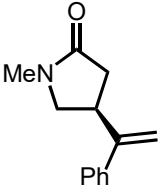</div></div> |                |       |
|---------------------------------------------------------------------------------------------------------------------------------------------------------------------------------------------------------------------------------------------------------------------------------------------------------------------------------------------------------|----------------|-------|
| Solvent                                                                                                                                                                                                                                                                                                                                                 | % yield (HPLC) | e.r.  |
| DMSO                                                                                                                                                                                                                                                                                                                                                    | 79             | >99:1 |
| MeCN                                                                                                                                                                                                                                                                                                                                                    | 63             | >99:1 |
| THF                                                                                                                                                                                                                                                                                                                                                     | 71             | >99:1 |
| EtOH                                                                                                                                                                                                                                                                                                                                                    | 76             | >99:1 |
| iPrOH                                                                                                                                                                                                                                                                                                                                                   | 92             | >99:1 |
| Acetone                                                                                                                                                                                                                                                                                                                                                 | 80             | >99:1 |
| DMF                                                                                                                                                                                                                                                                                                                                                     | 72             | >99:1 |

**Table SI-4:** Evaluation of buffer pH.

| <div><div>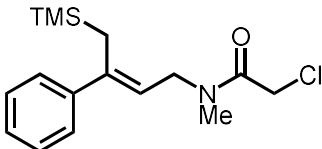</div><div><div>GluER-G6 (1 mol%)<br/>NADP<sup>+</sup>, GDH, glucose</div><div>TEOA (100 mM <b>pH = X</b>)<br/>10% v/v IPA<br/>Cyan LEDs</div></div><div>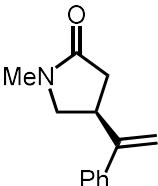</div></div> |                |       |
|-------------------------------------------------------------------------------------------------------------------------------------------------------------------------------------------------------------------------------------------------------------------------------------------------------------------------------------------------------|----------------|-------|
| pH                                                                                                                                                                                                                                                                                                                                                    | % yield (HPLC) | e.r.  |
| 7                                                                                                                                                                                                                                                                                                                                                     | 72             | >99:1 |
| 7.5                                                                                                                                                                                                                                                                                                                                                   | 78             | >99:1 |
| 8                                                                                                                                                                                                                                                                                                                                                     | 92             | >99:1 |
| 8.5                                                                                                                                                                                                                                                                                                                                                   | 83             | >99:1 |

**Table SI-5:** Evaluation of flavin recycling systems.

| <div style="display: flex; align-items: center; justify-content: space-around;"> <div style="text-align: center;"> 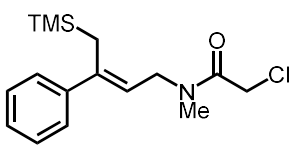 </div> <div style="text-align: center;"> <p>GluER-G6 (1 mol%)</p> <p><b>Cofactor Turnover Enzyme</b></p> <hr style="width: 50%; margin: 0 auto;"/> <p>NADP<sup>+</sup></p> <p>TEOA (100 mM pH = 8)</p> <p>10% v/v IPA</p> <p>Cyan LEDs</p> </div> <div style="text-align: center;"> 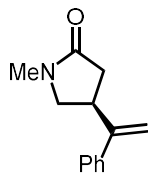 </div> </div> |                          |                        |                      |
|--------------------------------------------------------------------------------------------------------------------------------------------------------------------------------------------------------------------------------------------------------------------------------------------------------------------------------------------------------------------------------------------------------------------------------------------------------------------------------------------------------------------------------------------------------------------------------------------|--------------------------|------------------------|----------------------|
| substrate concentration                                                                                                                                                                                                                                                                                                                                                                                                                                                                                                                                                                    | KRED* Turnover (% yield) | GDH Turnover (% yield) | dithionite (% yield) |
| 18                                                                                                                                                                                                                                                                                                                                                                                                                                                                                                                                                                                         | 84                       | 86                     | 25                   |
| 24                                                                                                                                                                                                                                                                                                                                                                                                                                                                                                                                                                                         | 63                       | 64                     | n.d.                 |
| 36                                                                                                                                                                                                                                                                                                                                                                                                                                                                                                                                                                                         | 62                       | 38                     | n.d.                 |

\*Codexis KRED P103

**Table SI-6:** Evaluation of different wavelengths of light.

| <div style="display: flex; align-items: center; justify-content: space-around;"> <div style="text-align: center;"> 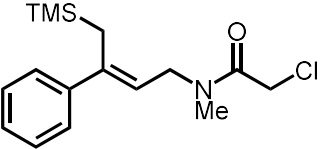 </div> <div style="text-align: center;"> <p>GluER-G6 (1 mol%)</p> <p>NADP<sup>+</sup>, GDH, glucose</p> <hr style="width: 50%; margin: 0 auto;"/> <p>TEOA (100 mM pH = 8)</p> <p>10% v/v iPrOH</p> <p><b>Color LED</b></p> </div> <div style="text-align: center;"> 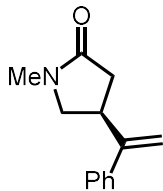 </div> </div> |                |  |       |
|----------------------------------------------------------------------------------------------------------------------------------------------------------------------------------------------------------------------------------------------------------------------------------------------------------------------------------------------------------------------------------------------------------------------------------------------------------------------------------------------------------------------------------------------------------------------------|----------------|--|-------|
| LED Color                                                                                                                                                                                                                                                                                                                                                                                                                                                                                                                                                                  | % yield (HPLC) |  | e.r.  |
| Cyan ( $\lambda_{\text{max}}$ = 497 nm)                                                                                                                                                                                                                                                                                                                                                                                                                                                                                                                                    | 92             |  | >99:1 |
| Blue ( $\lambda_{\text{max}}$ = 465 nm)                                                                                                                                                                                                                                                                                                                                                                                                                                                                                                                                    | 72             |  | >99:1 |
| Violet ( $\lambda_{\text{max}}$ = 395 nm)                                                                                                                                                                                                                                                                                                                                                                                                                                                                                                                                  | 19             |  | >99:1 |
| No Light                                                                                                                                                                                                                                                                                                                                                                                                                                                                                                                                                                   | 0              |  | >99:1 |

**Table SI-7:** Various control experiments

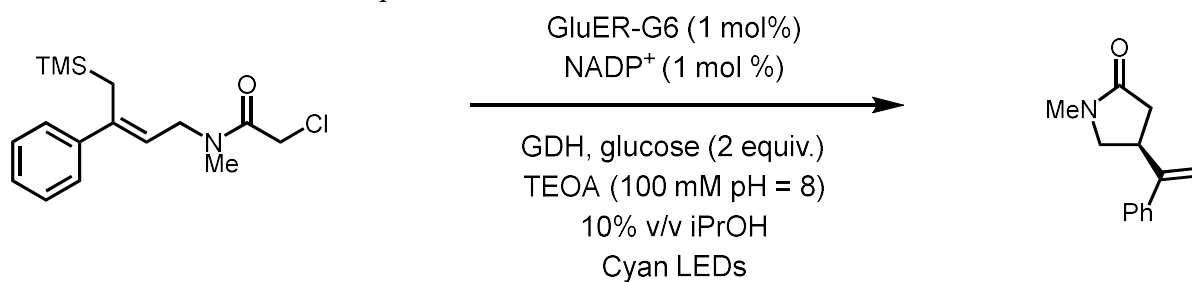

| Control Experiments    | % yield (HPLC) | e.r.  |
|------------------------|----------------|-------|
| Standard Conditions    | 92             | >99:1 |
| 1 equiv. of Glucose    | 79             | >99:1 |
| GluER-T36A (0.5 mol %) | 67             | >99:1 |
| GluER-G6 (0.5 mol %)   | 93             | >99:1 |
| no turnover mix        | 72             | >99:1 |
| no GluER-G6            | 0              | >99:1 |

## **Mechanistic Investigation**

### **Transient Absorption Studies**

All samples were prepared in an Mbraun oxygen free (<0.5ppm) glovebox. Solvents were freeze pump thawed and allowed to equilibrate in inert atmosphere for 24 hours. The buffer solution of 100mM TEOA pH 8 with 5% isopropyl alcohol. Each sample was prepared with 200nmoles of protein, and 1mg of sodium dithionite was used as the reducing agent to convert FMN<sub>OX</sub> to FMN<sub>HQ</sub>. Substrate **1** was added in 5mg quantity and the total volume of the solution was kept at 1mL. Transient absorption spectroscopy using the Ultrafast systems EOS or Helios and was conducted in sealed 2mm quartz cuvettes that were stirred and translated continually during the measurement.

Samples were excited at 370nm (Figure SI-3) with 300nJ of energy and the spot size was characterized in Figure SI-2. No appreciable aggregation or sample degradation was observed over the course of the experiment. Using the same methodology as in our previous studies<sup>1</sup> a quantum yield of 0.76% is observed for this reaction. To test the validity of the laser experiments LCMS was performed post experiment for both 370nm and 490nm samples and product formation compared. Product was formed under both conditions (Table SI-6).

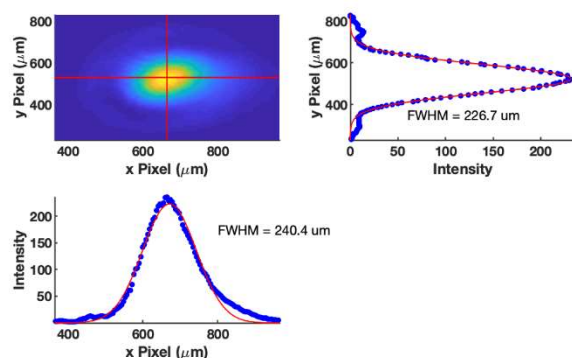

**Figure SI-2:** Gaussian fits to the excitation pulse size as measured on a CCD camera at sample position

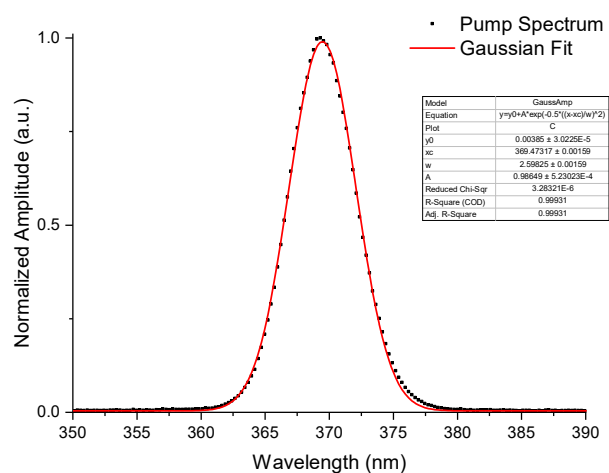

**Figure SI-3:** Gaussian fit to excitation pulse

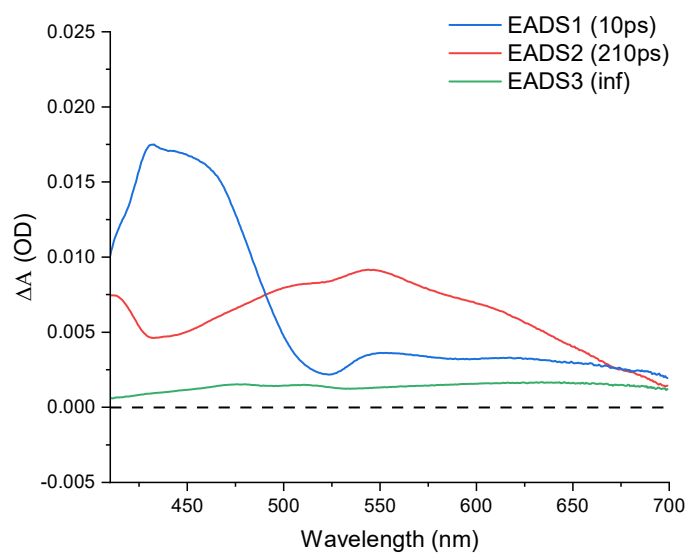

**Figure SI-4:** Evolutionary associated difference spectra for G6 and model substrate **1** in 100mM TEOA buffer pH 8 from 0 to 8ns.

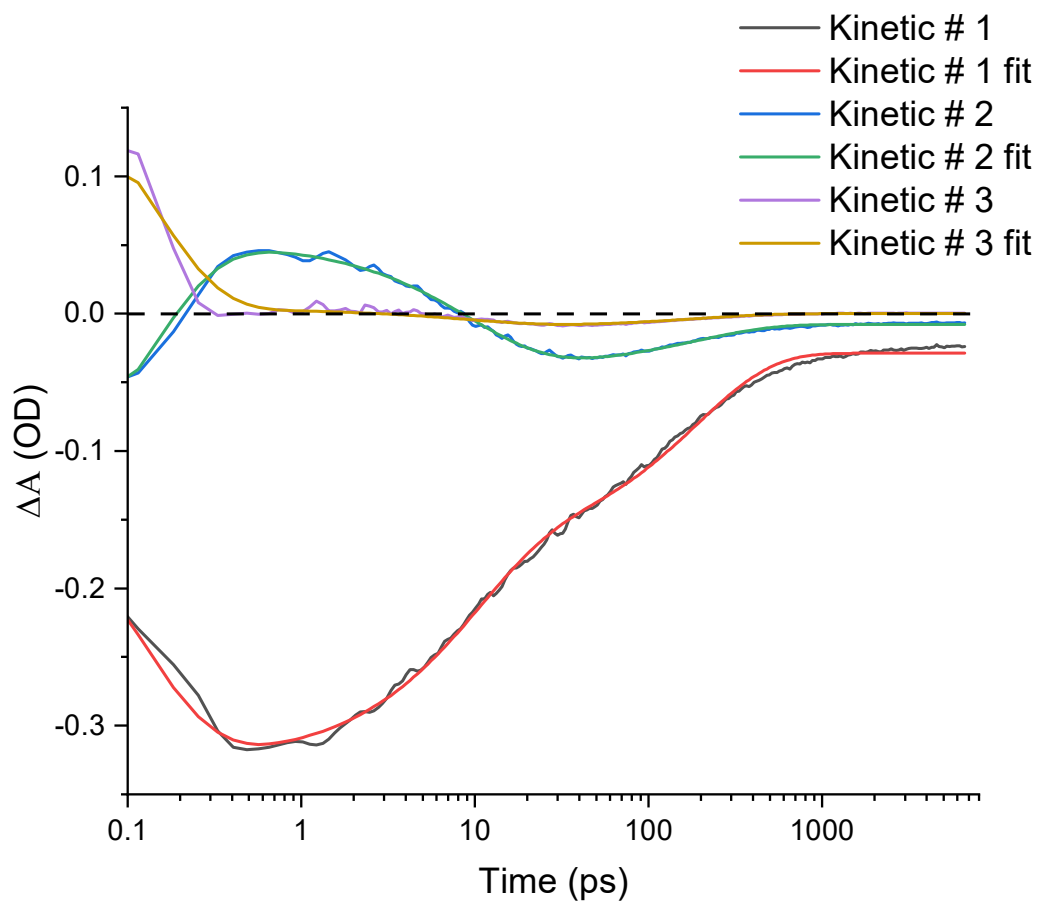

**Figure SI-5:** Principle kinetic fits for G6 and model substrate **1** in 100mM TEOA buffer pH 8 from 0 to 8ns.

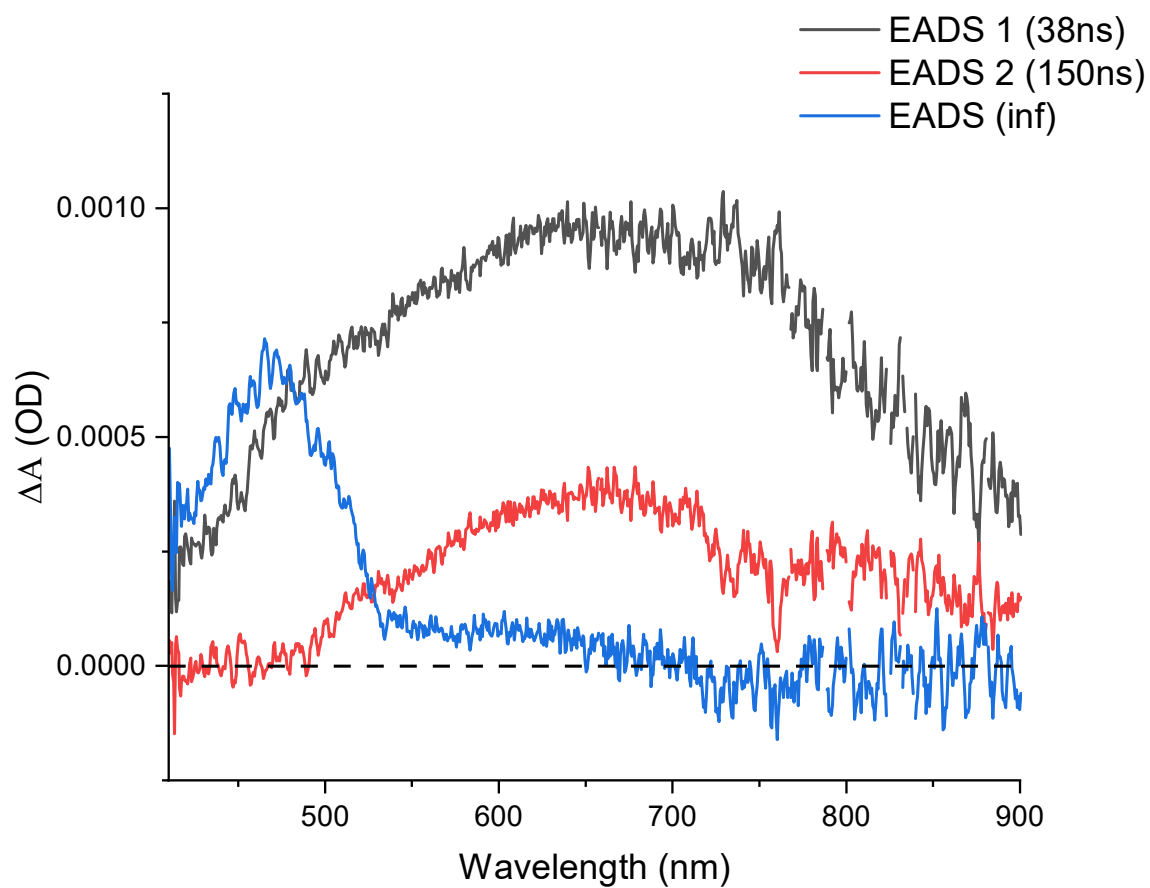

**Figure SI-6:** Evolutionary associated difference spectra for G6 and model substrate **1** in 100mM TEOA buffer pH 8 from 0 to 1  $\mu$ s.

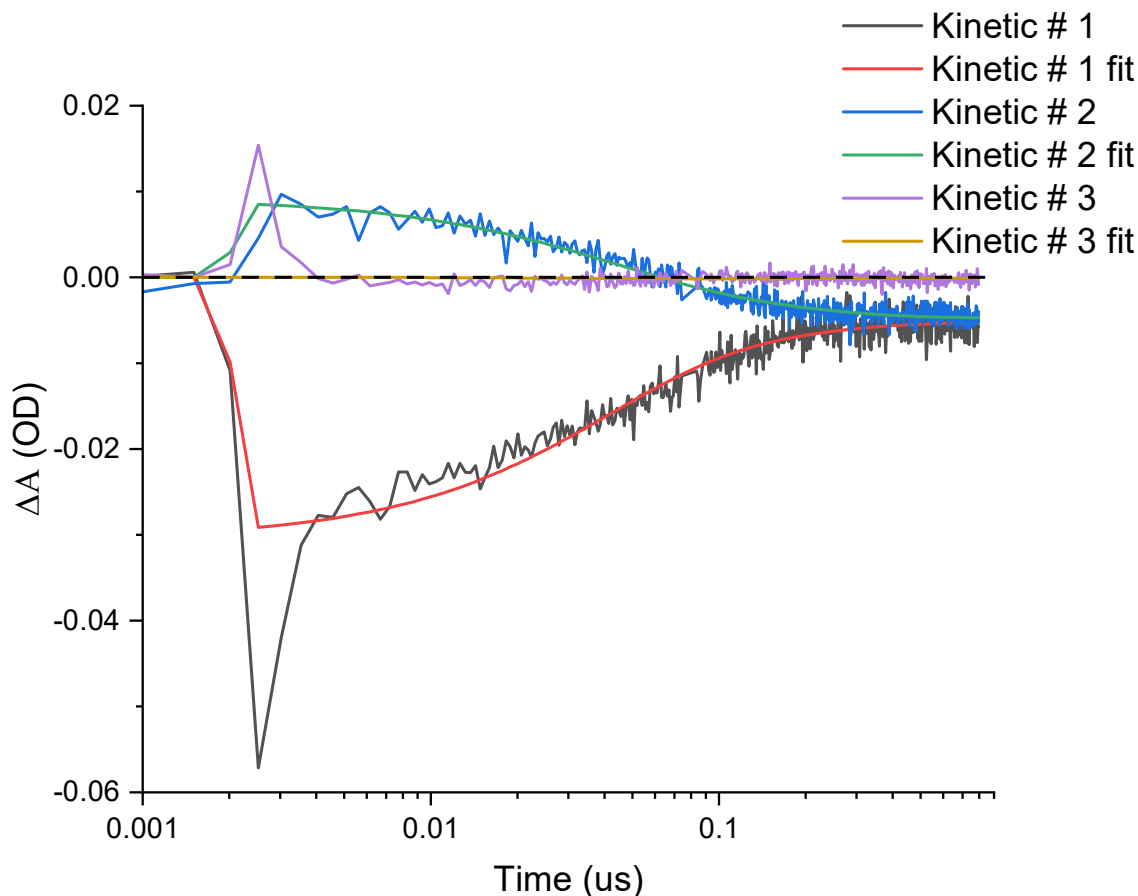

**Figure SI-7:** Principle kinetic fits for G6 and model substrate in 100mM TEOA buffer pH 8 from 0 to 1  $\mu$ s.

## Description

## Description

Performing global analysis on the transient absorption results and comparing them to data obtained previously<sup>2</sup>. The short time transient absorption results show initial mesolytic cleavage step after electron injection occurs within 10 ps as previously observed<sup>1,2</sup>. (Figure SI-7) Two other features are observed new broadly absorbing component is fit with infinite lifetime as it does not decay on this timescale and a 200 ps component is also observed and attributed to excited uncomplexed G6 hydroquinone. To elucidate the infinite time component, long-time transition absorption spectroscopy was conducted, and global analysis was again applied (Figure SI-6). The first 1 ns is fit with an instrument response function, so the short-time components are removed. The broadly absorbing feature can be seen to decay with a lifetime of 38 ns which is attributed to the beta-scission. An absorption spectrum of the neutral semiquinone then persists with a lifetime of 150 ns which decays to the oxidized flavin. As formation of oxidized flavin is observed the silyl radical abstracts the H-atom from the neutral semiquinone.

a)

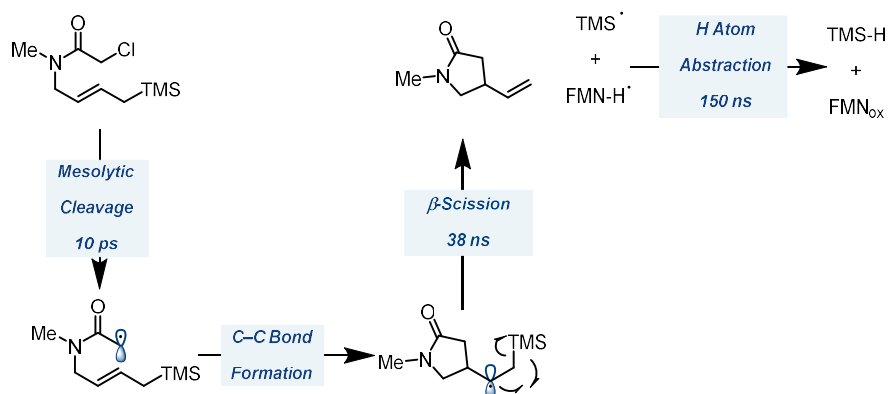

b)

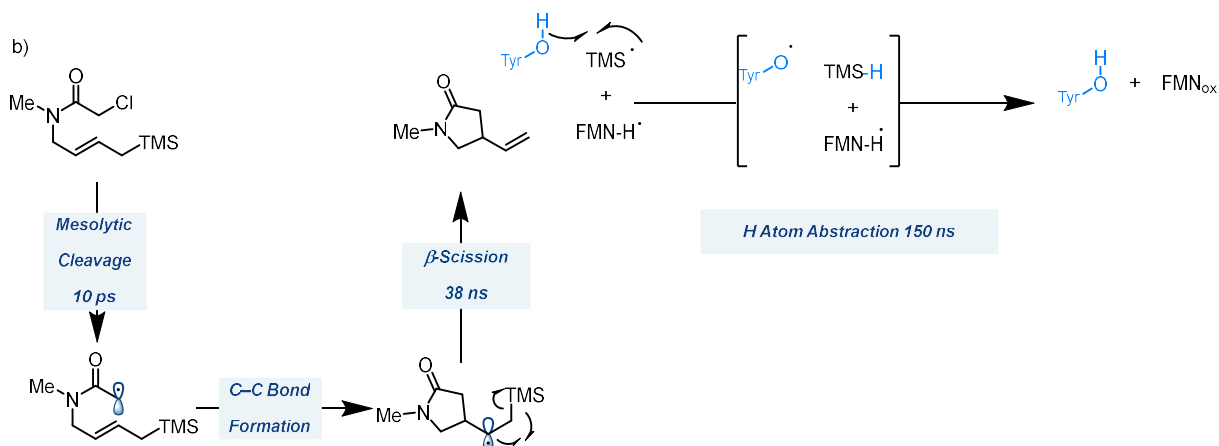

**Scheme SI-1:** Transient absorption mechanism with two possibilities for TMS radical termination. A) HAT from flavin semiquinone to TMS radical. B) HAT from an enzymatic tyrosine to TMS radical, followed by reaction between tyrosyl radical and FMN semiquinone to form the flavin quinone.

## Charge-Transfer Complex

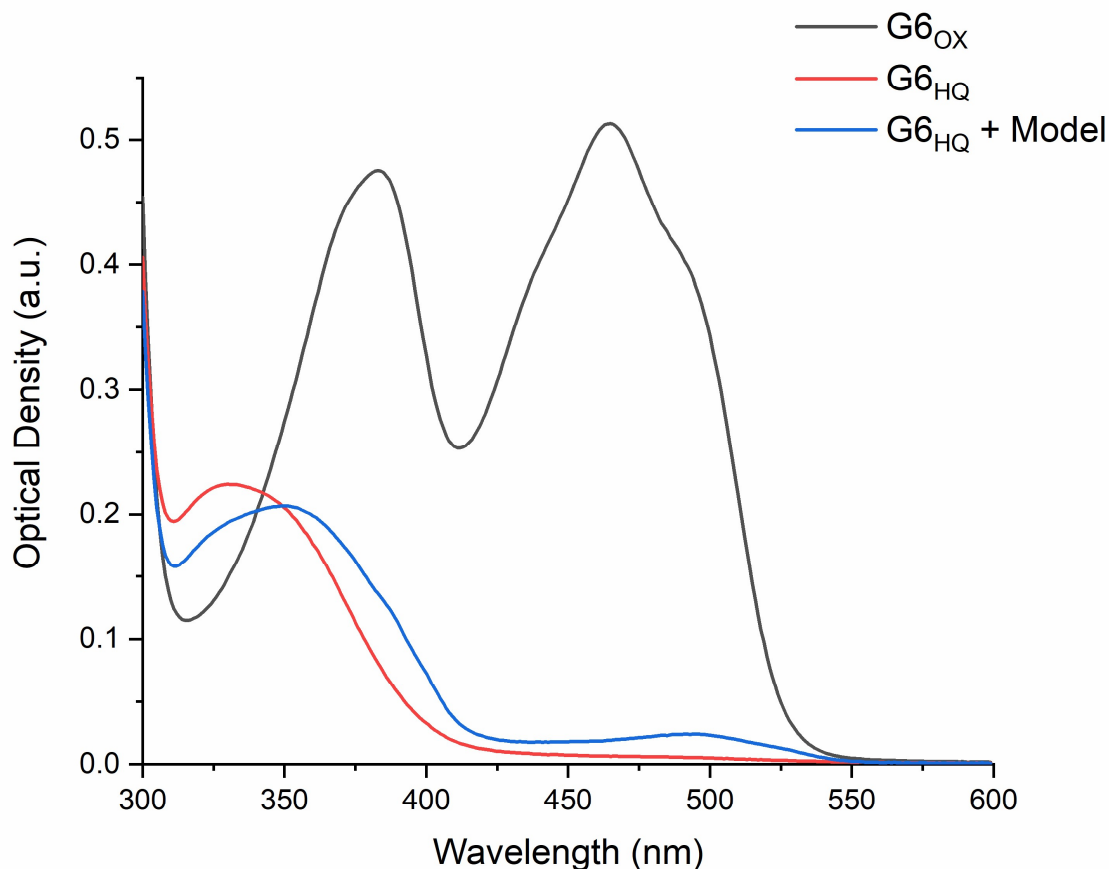

**Figure SI-8:** UV-vis spectrum of G6 enzyme with FMN in the oxidized state (gray), reduced G6 (FMN hydroquinone, red), and reduced G6 with an excess of model substrate **1** (blue). The spectral feature at 490 nm indicates the presence of a charge-transfer complex.

The charge transfer state was characterized in 2mm quartz cuvette prepared in the same manner as for transient absorption studies. The UV-Vis spectrum of G6 in the oxidized form was taken with baseline subtraction followed by the additional of 0.05mg of sodium dithionite in 10uL of buffer solution to generate the reduced form of the flavin and again verified by UV-Vis. Finally, addition of 5mg of **1** was added in 50uL of isopropyl alcohol and the UV-Vis spectrum was taken showing a growth at 490nm.

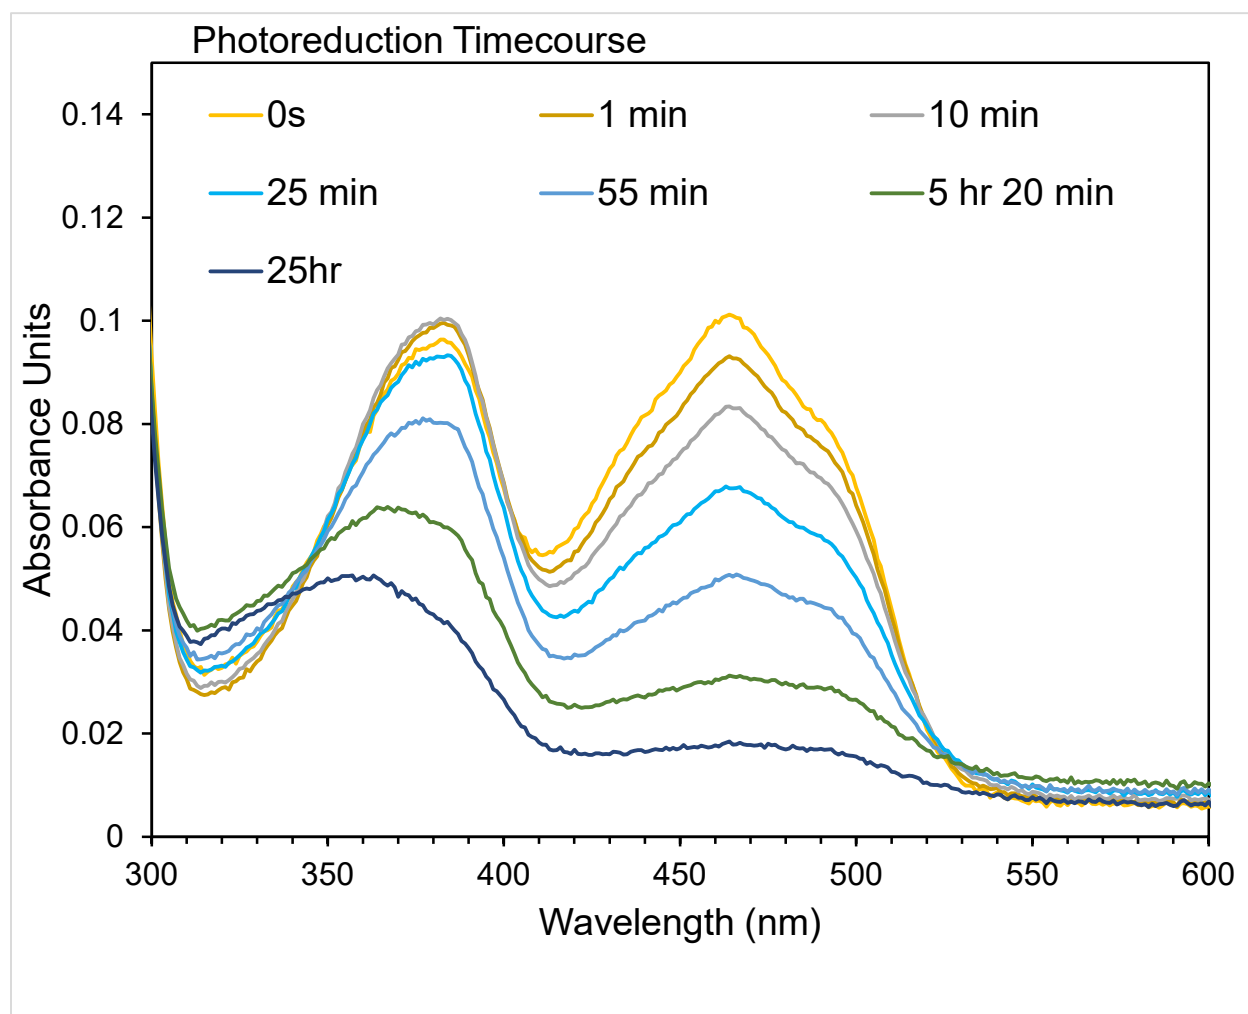

**Figure SI-9:** UV-vis spectrum of G6 enzyme in TEOA buffer (pH = 8) with FMN in the oxidized state (yellow, 0 s), irradiated with cyan light over the course of 25 hours, at which point the primary species was the fully reduced flavin hydroquinone (dark blue, 25 hr).

A thoroughly cleansed 1mL quartz cuvette with a Schlenk adaptor was filled with approximately 2 mL of buffer (100 mM TEOA, pH = 8). The volume of buffer then thoroughly freeze-pump-thawed for a total of 4 cycles. Each cycle entailed the following: first freezing the buffer/enzymatic mixture for 3 minutes using an acetone and dry ice bath. Then once the mixture was completely frozen, it was opened to vacuum for another 5 minutes while in the dry ice/IPA bath. The vacuum was then closed and the mixture was allowed to thaw under static vacuum in room temperature water, and then repeated for another 2 cycles. The buffer vessel was then placed under static vacuum and taken into an oxygen free mBraun glove box. Once inside the glove box, the static vacuum was released. 100 nanomoles/95 microliters of G6 GluER aliquots were added to the freeze pump thawed buffer mixture and the schlenk cuvette was resealed inside this oxygen free environment (<4ppm O<sub>2</sub>). This schlenk cuvette of the GluER enzymatic buffer mixture was then sealed tightly, removed from the glovebox and exposed to cyan irradiation for over a course of 26 hour. At several time increments, the enzymatic buffer filled

cuvette was briefly taken to a UV spectrometer to observe the photoreduction of Flavin cofactor inside the GluER ene-reductase, before returning to being cyan irradiated. At the beginning of the experiment (0 s of photoreduction), most of the flavin species present in the mixture is currently residing at its fully oxidized state, as indicated by large absorbance bands at approximately 380 nm and 460 nm. However, over the course of a few hours, it can be seen that the primary Flavin redox species is that of its hydroquinone, by a significant band feature growth at 360 nm.

## General Procedures for Substrate Synthesis

### Synthesis of Unsubstituted Allylsilane Substrates

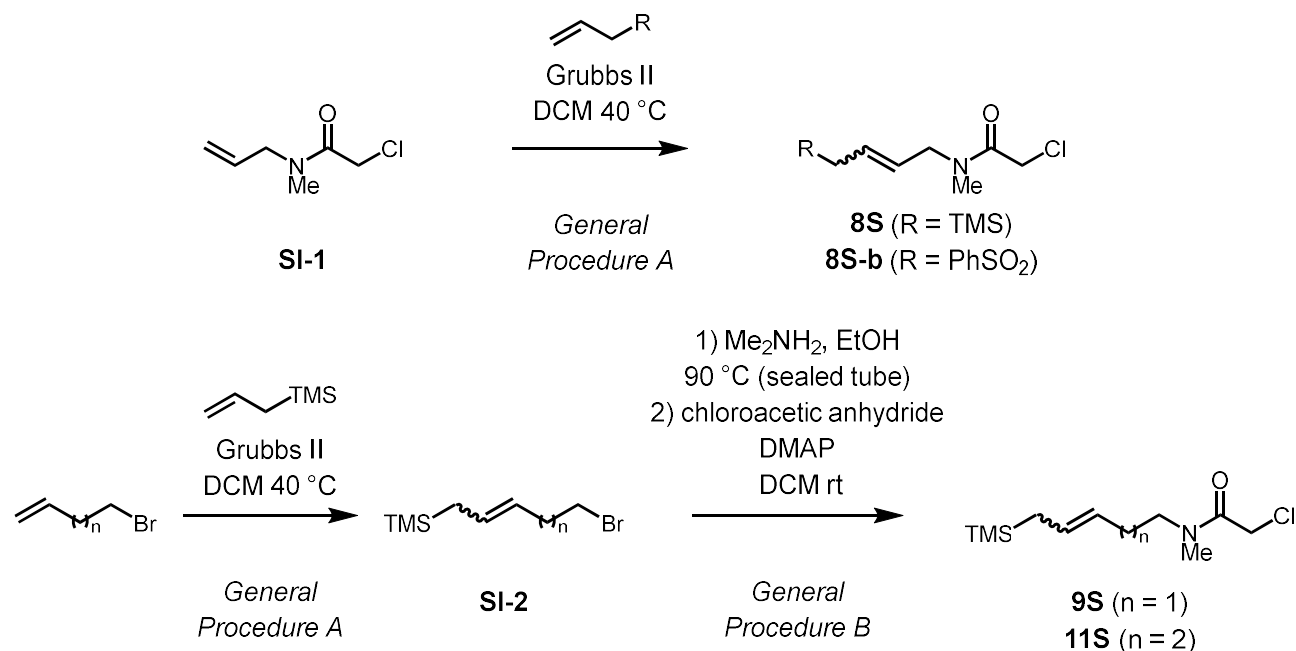

**General Procedure A:** Terminal olefin (1 equiv.) and allyltrimethylsilane (3 equiv.) were dissolved in DCM (0.1 M) and Grubbs second generation catalyst (3 mol%) was added according to a procedure adapted from Rodriguez and coworkers<sup>3</sup>. The reaction mixture was sparged for 15 minutes with N<sub>2</sub> and heated to reflux overnight. The crude reaction mixture was concentrated by rotary evaporator and purified by flash column chromatography eluting with hexanes/EtOAc to afford the title compound as a clear or brown oil. For mixtures of *E* and *Z* isomers, the <sup>1</sup>H and <sup>13</sup>C NMR data is reported for the mixture. Note: amide rotamers lead to the doubling of many peaks in the <sup>13</sup>C NMR spectra. When non-overlapping peaks chemical shift round to the same value, they are reported followed by “(2)”.

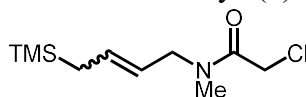

16

**(*E/Z*)-2-chloro-N-methyl-N-(4-(trimethylsilyl)but-2-en-1-yl)acetamide (8S):** Prepared according to General Procedure A using 346 mg (2.4 mmol) SI-1<sup>4</sup> to afford 67 mg (11% yield) of 8S as a clear oil. <sup>1</sup>H NMR (400 MHz, CDCl<sub>3</sub>) δ 5.62 (ddddd, *J* = 11.6, 9.6, 8.2, 5.1, 3.5 Hz, 1H), 5.23 (ddddd, *J* = 12.0, 10.6, 6.4, 3.0 Hz, 1H), 4.07 (s, 2H), 3.93 (d, *J* = 6.7 Hz, 1H), 3.88 (dd, *J* = 6.0, 1.4 Hz, 1H), 2.96 (d, *J* = 27.1 Hz, 3H), 1.55 – 1.44 (m, 2H), 0.00 (d, *J* = 2.9 Hz, 9H). <sup>13</sup>C NMR (126 MHz, CDCl<sub>3</sub>) δ 166.7, 166.3, 132.2, 131.7, 122.1, 122.0, 52.5, 50.2, 41.7, 41.3, 34.7, 33.7, 23.1, -1.7, -1.8. IR (cm<sup>-1</sup>): 2953, 1734, 1616, 1406, 1248, 1192, 849. HRMS: calculated for C<sub>10</sub>H<sub>21</sub>ClNOSi [M+H]<sup>+</sup>: 234.1075. Found [M+H]<sup>+</sup>: 234.1033.

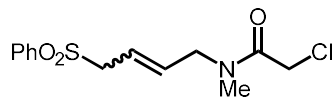

**16b**

**(*E/Z*)-2-chloro-*N*-methyl-*N*-(4-(phenylsulfonyl)but-2-en-1-yl)acetamide (8S-b):** Prepared according to General Procedure A using **SI-1** using 100 mg **SI-1** (0.68 mmol) to afford 56 mg (27% yield) of **8S-b** as a slightly brown oil.  $^1\text{H}$  NMR (400 MHz,  $\text{CDCl}_3$ )  $\delta$  7.85 (dt,  $J = 7.2, 1.4$  Hz, 2H), 7.70 – 7.62 (m, 1H), 7.60 – 7.52 (m, 2H), 5.71 – 5.36 (m, 2H), 4.04 (s, 1H), 3.97 – 3.91 (m, 3H), 3.81 (dd,  $J = 13.9, 6.1$  Hz, 2H), 2.89 (d,  $J = 51.5$  Hz, 3H).  $^{13}\text{C}$  NMR (101 MHz,  $\text{CDCl}_3$ )  $\delta$  166.5, 138.5, 134.6, 134.1, 129.4, 128.5, 119.7, 59.7, 49.5, 41.4, 35.4. IR ( $\text{cm}^{-1}$ ): 2968, 1645, 1447, 1404, 1378, 1305, 1138, 1085, 974, 951. HRMS: calculated for  $\text{C}_{13}\text{H}_{17}\text{ClNO}_3\text{S}$   $[\text{M}+\text{H}]^+$ : 302.06122. Found  $[\text{M}+\text{H}]^+$ : 302.0624.

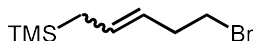

**SI-2a**

**(*E/Z*)-(5-bromopent-2-en-1-yl)trimethylsilane (SI-2a):** Prepared according to General Procedure A using 1.0 g (7.4 mmol) of 4-bromobut-1-ene to afford 1.4 g (85% yield) of **SI-2a** as a clear oil.  $^1\text{H}$  NMR (400 MHz,  $\text{CDCl}_3$ )  $\delta$  5.52 (dddd,  $J = 16.2, 9.4, 6.1, 2.0$  Hz, 1H), 5.25 – 5.17 (m, 1H), 3.35 (td,  $J = 7.3, 1.7$  Hz, 2H), 2.65 – 2.48 (m, 2H), 1.40 (dt,  $J = 4.3, 2.6$  Hz, 2H), 0.01 – -0.01 (m, 9H).

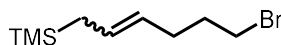

**SI-2b**

**(*E/Z*)-(6-bromohex-2-en-1-yl)trimethylsilane (SI-2b):** Prepared according to General Procedure A using 1.0 g (6.7 mmol) of 5-bromopent-1-ene to afford 1.0 g (63% yield) of **SI-2b** as a clear oil.  $^1\text{H}$  NMR (400 MHz,  $\text{CDCl}_3$ )  $\delta$  5.59 – 5.38 (m, 1H), 5.20 (tdd,  $J = 9.5, 6.5, 4.5$  Hz, 1H), 3.46 – 3.29 (m, 2H), 2.31 – 2.09 (m, 2H), 1.90 (q,  $J = 7.0$  Hz, 2H), 1.45 – 1.36 (m, 2H), -0.01 (d,  $J = 2.4$  Hz, 9H).

**General Procedure B:** Alkyl bromide (1 equiv.) was dissolved in a solution of  $\text{MeNH}_2$  (33% in EtOH, 0.3 M) in a sealed tube and heated to 90 °C overnight. The reaction mixture was concentrated by rotary evaporator and the crude product was diluted with diethyl ether and 1M HCl. The layers were separated and the aqueous layer was adjusted to pH >12 by addition of 1M NaOH and extracted with three portions of diethyl ether. The combined organic layers were dried over  $\text{MgSO}_4$  and concentrated by rotary evaporator. The resulting crude amine was dissolved in DCM (0.1 M) and treated with chloroacetic anhydride (1.2 equiv.) and DMAP (0.1 equiv.) at room temperature. When judged complete by TLC analysis, the reaction mixture was poured onto 1M HCl and diluted with DCM. The layers were separated and the aqueous layer was extracted with two additional portions of DCM. The combined organic layers were dried over  $\text{Na}_2\text{SO}_4$  and concentrated by rotary evaporator before purification by flash column chromatography to afford the title  $\alpha$ -chloroamide as a clear oil. For mixtures of *E* and *Z* isomers, the  $^1\text{H}$  and  $^{13}\text{C}$  NMR data is reported for the mixture.

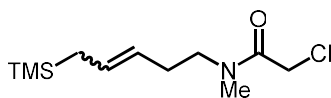

**9S**

**(*E/Z*)-2-chloro-*N*-methyl-*N*-(5-(trimethylsilyl)pent-3-en-1-yl)acetamide (9S):** Prepared according to General Procedure B using **SI-2a** (451 mg 2.0 mmol) to afford 188 mg (37% yield) of **9S** as a clear oil.  $^1\text{H NMR}$  (500 MHz,  $\text{CDCl}_3$ )  $\delta$  5.59 – 5.41 (m, 1H), 5.26 – 5.11 (m, 1H), 4.07 (dd,  $J$  = 12.6, 7.4 Hz, 2H), 3.43 – 3.30 (m, 2H), 3.01 (dd,  $J$  = 52.5, 11.1 Hz, 3H), 2.28 (ddd,  $J$  = 25.8, 10.7, 5.1 Hz, 2H), 1.52 – 1.38 (m, 2H), -0.01 (dd,  $J$  = 14.0, 6.0 Hz, 9H).  $^{13}\text{C NMR}$  (126 MHz,  $\text{CDCl}_3$ )  $\delta$  166.5, 130.8, 129.5, 129.3, 128.4, 124.6, 123.3, 123.0, 121.8, 50.9, 50.3, 48.8, 48.6, 41.7, 41.2, 41.1, 36.2, 36.0, 33.9, 33.8, 32.0, 30.7, 26.2, 25.0, 23.1, 22.9, 19.0, 18.8, -1.8. **IR** ( $\text{cm}^{-1}$ ): 2959, 1652, 1404, 1247, 1152, 849. **HRMS**: calculated for  $\text{C}_{11}\text{H}_{23}\text{ClNO}_3\text{Si}$   $[\text{M}+\text{H}]^+$ : 248.1232. Found  $[\text{M}+\text{H}]^+$ : 248.1245.

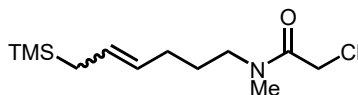

**11S**

**(*E/Z*)-2-chloro-*N*-methyl-*N*-(6-(trimethylsilyl)hex-4-en-1-yl)acetamide (11S):** Prepared according to General Procedure B using **SI-2b** (265 mg, 1.1 mmol) to afford 96 mg (33% yield) of **11S** as a clear oil.  $^1\text{H NMR}$  (400 MHz,  $\text{CDCl}_3$ )  $\delta$  5.55 – 5.34 (m, 1H), 5.23 (dt,  $J$  = 14.8, 7.0 Hz, 1H), 4.11 (d,  $J$  = 16.8 Hz, 2H), 3.44 – 3.26 (m, 2H), 3.01 (dd,  $J$  = 45.0, 1.9 Hz, 3H), 2.02 (dt,  $J$  = 12.5, 5.8 Hz, 2H), 1.63 (dt,  $J$  = 32.5, 7.7 Hz, 2H), 1.49 – 1.36 (m, 2H), -0.01 (dd,  $J$  = 5.7, 4.3 Hz, 9H).  $^{13}\text{C NMR}$  (126 MHz,  $\text{CDCl}_3$ )  $\delta$  170.2, 166.9, 166.8, 128.3, 127.7, 127.5, 127.3, 126.7, 126.7, 126.2, 125.4, 50.1, 48.4, 48.3, 41.5, 40.9, 40.8, 40.8, 35.9 (2), 34.0, 30.1, 29.9, 28.6, 28.5, 27.3, 27.1, 24.3, 24.0, 22.9, 22.8, 18.9, 18.7, -1.8 (2). **IR** ( $\text{cm}^{-1}$ ): 2952, 1652, 1405, 1247, 1152, 841. **HRMS**: calculated for  $\text{C}_{12}\text{H}_{25}\text{ClNOSi}$   $[\text{M}+\text{H}]^+$ : 262.1388. Found  $[\text{M}+\text{H}]^+$ : 262.1401.

### Synthesis of Trisubstituted Substrates

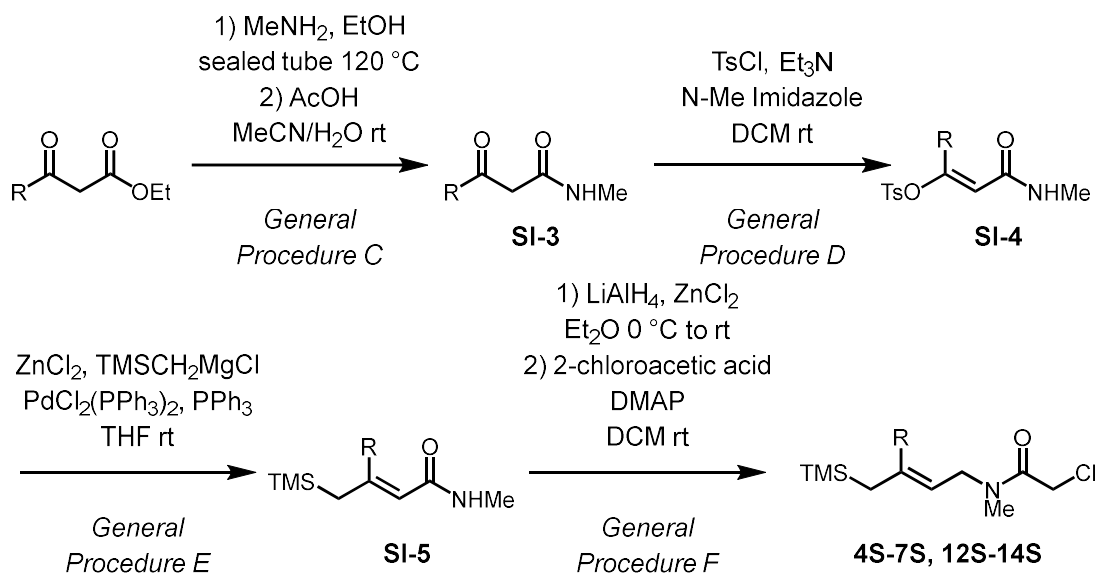

**General procedure C:**  $\beta$ -keto ester (1 equiv.) was added to a solution of MeNH<sub>2</sub> (33% in EtOH, 0.3 M) in a sealed tube and heated to 120 °C for 24 hours. After cooling to room temperature, the reaction mixture was concentrated by rotary evaporator and the crude reaction mixture was redissolved in MeCN/H<sub>2</sub>O (9:1, 0.25 M) and AcOH (1% v/v of MeCN/H<sub>2</sub>O mix) was added. The reaction mixture was allowed to stir for 24 hours at room temperature before diluting with sodium bicarbonate solution and extracting with three portions of EtOAc. The combined organic layers were dried over Na<sub>2</sub>SO<sub>4</sub>, concentrated by rotary evaporator and purified by flash column chromatography eluting with hexane/EtOAc to afford the  $\beta$ -keto amides **SI-3**.

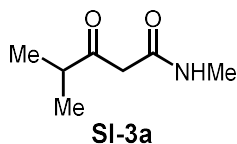

**N,4-dimethyl-3-oxopentanamide (SI-3a):** Prepared according to General Procedure C using ethyl 4-methyl-3-oxopentanoate (3.0 g, 19.0 mmol) to afford 1.03g (38% yield) of **SI-3a**. <sup>1</sup>H NMR (300 MHz, CDCl<sub>3</sub>)  $\delta$  7.09 (s, 1H), 3.44 (s, 2H), 2.83 (d,  $J$  = 4.9 Hz, 3H), 2.68 (p,  $J$  = 6.9 Hz, 1H), 1.13 (d,  $J$  = 7.0 Hz, 6H).

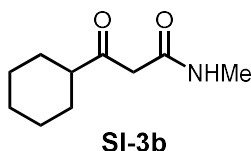

**3-cyclohexyl-N-methyl-3-oxopropanamide (SI-3b):** Prepared according to General Procedure C using methyl 3-cyclohexyl-3-oxopropanoate<sup>5</sup> (10.0 g, 54.2 mmol) split across two sealed tubes (5 g each) to afford 3.0 g (30% yield) of **SI-3b**. <sup>1</sup>H NMR (400 MHz, CDCl<sub>3</sub>)  $\delta$  3.45 (s, 2H), 2.85 (d,  $J$  = 4.9 Hz, 3H), 2.44 (tt,  $J$  = 11.1, 3.5 Hz, 1H), 1.93 – 1.06 (m, 10H).

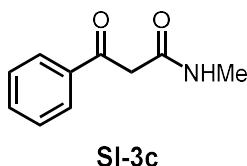

**N-methyl-3-oxo-3-phenylpropanamide (SI-3c):** Prepared according to General Procedure C using methyl 3-oxo-3-phenylpropanoate (5.0 g, 26.0 mmol) to afford 2.05 g (44% yield) of **SI-3c**. <sup>1</sup>H NMR (300 MHz, CDCl<sub>3</sub>)  $\delta$  8.05 – 7.90 (m, 2H), 7.66 – 7.55 (m, 1H), 7.49 (dd,  $J$  = 8.4, 7.1 Hz, 2H), 3.95 (s, 2H), 2.86 (d,  $J$  = 4.9 Hz, 3H).

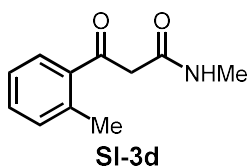

**N-methyl-3-oxo-3-(o-tolyl)propanamide (SI-3d):** Prepared according to General Procedure C using methyl 3-oxo-3-(o-tolyl)propanoate<sup>6</sup> (4.0 g, 20.8 mmol) to afford 1.4 g (35% yield) of **SI-3d**. <sup>1</sup>H NMR (400 MHz, CDCl<sub>3</sub>)  $\delta$  7.75 (d,  $J$  = 7.7 Hz, 1H), 7.48 – 7.28 (m, 2H), 3.91 (s, 2H), 2.88 (d,  $J$  = 4.6 Hz, 3H), 2.52 (s, 3H).

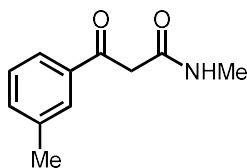

**SI-3e**

***N*-methyl-3-oxo-3-(*m*-tolyl)propenamide (SI-3e):** Prepared according to General Procedure C using methyl 3-oxo-3-(*m*-tolyl)propanoate<sup>4</sup> (2.6g, 13.5 mmol) to afford 1.65 g (64% yield) of **SI-3e**. <sup>1</sup>H NMR (300 MHz, CDCl<sub>3</sub>) δ 7.80 (s, 1H), 7.46 – 7.35 (m, 2H), 7.29 (s, 1H), 3.94 (s, 2H), 2.87 (d, *J* = 4.9 Hz, 3H), 2.42 (s, 3H).

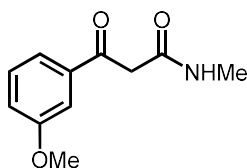

**SI-3f**

**3-(3-methoxyphenyl)-*N*-methyl-3-oxopropenamide (SI-3f):** Prepared according to General Procedure C using methyl 3-(3-methoxyphenyl)-3-oxopropanoate<sup>7</sup> (3.4 g, 16.3 mmol) to afford 2.06 g (61% yield) of **SI-3f**. <sup>1</sup>H NMR (300 MHz, CDCl<sub>3</sub>) δ 7.58 (dt, *J* = 7.6, 1.2 Hz, 1H), 7.53 – 7.48 (m, 1H), 7.40 (t, *J* = 8.0 Hz, 1H), 7.19 – 7.13 (m, 1H), 3.94 (s, 2H), 3.86 (s, 3H), 2.87 (d, *J* = 4.8 Hz, 3H).

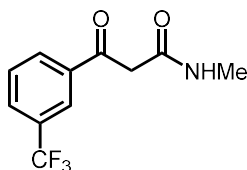

**SI-3g**

***N*-methyl-3-oxo-3-(3-(trifluoromethyl)phenyl)propenamide (SI-3g):** Prepared according to General Procedure C using methyl 3-oxo-3-(3-(trifluoromethyl)phenyl)propanoate<sup>8</sup> (5.89 g, 23.9 mmol) to afford 2.6g (44% yield) of **SI-3g**. <sup>1</sup>H NMR (400 MHz, CDCl<sub>3</sub>) δ 8.29 – 8.16 (m, 2H), 7.87 (d, *J* = 7.7 Hz, 1H), 7.65 (t, *J* = 7.7 Hz, 1H), 3.99 (s, 2H), 2.88 (d, *J* = 4.6 Hz, 3H).

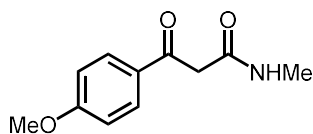

**SI-3h**

**3-(4-methoxyphenyl)-*N*-methyl-3-oxopropenamide (SI-3h):** Prepared according to General Procedure C using methyl 3-(4-methoxyphenyl)-3-oxopropanoate<sup>4</sup> (2.5 g, 12 mmol) to afford 2.13 g (86% yield) of **SI-3h**. <sup>1</sup>H NMR (300 MHz, CDCl<sub>3</sub>) δ 8.03 – 7.91 (m, 2H), 7.18 (s, 1H), 6.99 – 6.88 (m, 2H), 3.89 (s, 2H), 3.88 (s, 3H), 2.85 (d, *J* = 4.8 Hz, 3H).

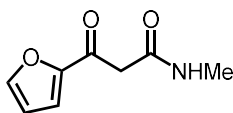

**SI-3i**

**3-(furan-2-yl)-N-methyl-3-oxopropanamide (SI-3i):** Prepared according to General Procedure C using methyl 3-(furan-2-yl)-3-oxopropanoate<sup>9</sup> (5.7 g, 34 mmol) to afford 580 mg (10% yield) of **SI-3i**. <sup>1</sup>H NMR (400 MHz, CDCl<sub>3</sub>) δ 7.61 (s, 1H), 7.30 (s, 1H), 7.11 (s, 1H), 6.54 (s, 1H), 3.77 (d, *J* = 1.8 Hz, 2H), 2.81 (d, *J* = 4.5 Hz, 3H).

**General procedure D:** Following a modified procedure to that reported by Mazet and coworkers<sup>10</sup> (The *E* enol tosylate stereochemistry was assigned by analogy to the esters prepared therein): β-keto amide **SI-3** (1 equiv.) was dissolved in DCM (0.13 M) and treated with triethylamine (3 equiv.), N-methylimidazole (2 equiv.), and tosyl chloride (2 equiv.) and allowed to stir at room temperature overnight. The mixture was diluted with DCM and washed with 1M HCl. The aqueous layer was extracted with two portions of EtOAc and the combined organic layers were dried over Na<sub>2</sub>SO<sub>4</sub>, concentrated by rotary evaporator and purified by flash column chromatography eluting with hexanes/EtOAc to afford the tosylates **SI-4**.

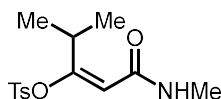

**SI-4a**

**(E)-4-methyl-1-(methylamino)-1-oxopent-2-en-3-yl 4-methylbenzenesulfonate (SI-4a):** Prepared according to General Procedure D using **SI-3a** (2.0 g, 14.0 mmol) to afford 1.16 g (28% yield) of **SI-4a**. <sup>1</sup>H NMR (300 MHz, CDCl<sub>3</sub>) δ 7.89 – 7.75 (m, 2H), 7.37 (d, *J* = 8.0 Hz, 2H), 6.29 (s, 1H), 5.50 (d, *J* = 1.2 Hz, 1H), 2.80 – 2.71 (m, 1H), 2.68 (d, *J* = 4.9 Hz, 3H), 2.46 (s, 3H), 1.08 (d, *J* = 6.8 Hz, 6H).

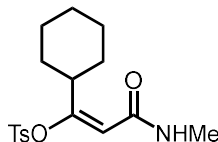

**SI-4b**

**(E)-1-cyclohexyl-3-(methylamino)-3-oxoprop-1-en-1-yl 4-methylbenzenesulfonate (SI-4b):** Prepared according to General Procedure D using **SI-3b** (3.0 g, 16.4 mmol) to afford 2.3 g (42% yield) of **SI-4b**. <sup>1</sup>H NMR (400 MHz, CDCl<sub>3</sub>) δ 7.86 – 7.77 (m, 2H), 7.44 – 7.35 (m, 2H), 6.28 (s, 1H), 5.45 (d, *J* = 1.2 Hz, 1H), 2.69 (d, *J* = 4.9 Hz, 3H), 2.47 (s, 3H), 2.42 – 2.34 (m, 1H), 1.93 (d, *J* = 12.3 Hz, 2H), 1.75 (d, *J* = 12.1 Hz, 2H), 1.25 – 1.00 (m, 6H).

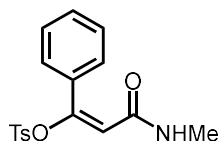

**SI-4c**

**(E)-3-(methylamino)-3-oxo-1-phenylprop-1-en-1-yl 4-methylbenzenesulfonate (SI-4c):** Prepared according to General Procedure D using **SI-3c** (1.6 g, 9.0 mmol) to afford 1.9 g (64% yield) of **SI-4c**. <sup>1</sup>H NMR (500 MHz, CDCl<sub>3</sub>) δ 7.63 (d, *J* = 8.0 Hz, 2H), 7.34 (t, *J* = 9.1 Hz, 3H), 7.25 (dd, *J* = 11.6, 7.6 Hz, 4H), 6.61 – 6.48 (m, 1H), 6.01 (s, 1H), 2.80 (d, *J* = 4.6 Hz, 3H), 2.42 (s, 3H).

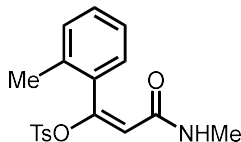

**SI-4d**

**(E)-3-(methylamino)-3-oxo-1-(o-tolyl)prop-1-en-1-yl 4-methylbenzenesulfonate (SI-4d):** Prepared according to General Procedure D using **SI-3d** (1.4 g, 7.28 mmol) to afford 1.16 g (46% yield) of **SI-4d**. <sup>1</sup>H NMR (300 MHz, CDCl<sub>3</sub>) δ 7.45 – 7.34 (m, 2H), 7.21 – 7.06 (m, 5H), 6.96 (d, *J* = 7.5 Hz, 1H), 6.79 (s, 1H), 5.72 (s, 1H), 2.92 (d, *J* = 4.9 Hz, 3H), 2.38 (s, 3H), 2.16 (s, 3H).

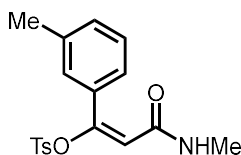

**SI-4e**

**(E)-3-(methylamino)-3-oxo-1-(m-tolyl)prop-1-en-1-yl 4-methylbenzenesulfonate (SI-4e):** Prepared according to General Procedure D using **SI-3e** (1.53 g, 8.0 mmol) to afford 1.75 g (63% yield) of **SI-4e**. <sup>1</sup>H NMR (300 MHz, CDCl<sub>3</sub>) δ 7.77 – 7.68 (m, 2H), 7.41 – 7.22 (m, 6H), 6.67 (s, 1H), 6.11 (d, *J* = 1.3 Hz, 1H), 2.93 (dd, *J* = 4.9, 1.3 Hz, 3H), 2.53 (s, 3H), 2.34 (s, 3H).

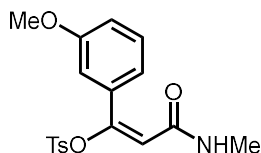

**SI-4f**

**(E)-1-(3-methoxyphenyl)-3-(methylamino)-3-oxoprop-1-en-1-yl 4-methylbenzenesulfonate (SI-4f):** Prepared according to General Procedure D using **SI-3f** (1.79 g, 8.6 mmol) to afford 3.06 g (98% yield) of **SI-4f**. <sup>1</sup>H NMR (300 MHz, CDCl<sub>3</sub>) δ 7.73 – 7.66 (m, 2H), 7.31 (d, *J* = 8.1 Hz, 2H), 7.22 (d, *J* = 7.9 Hz, 1H), 7.05 – 6.81 (m, 3H), 6.61 (s, 1H), 6.09 (s, 1H), 3.79 (s, 3H), 2.87 (d, *J* = 4.9 Hz, 3H), 2.49 (s, 3H).

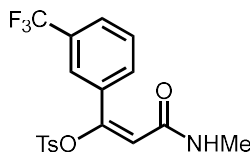

**SI-4g**

**(E)-3-(methylamino)-3-oxo-1-(3-(trifluoromethyl)phenyl)prop-1-en-1-yl 4-methylbenzenesulfonate (SI-4g):** Prepared according to General Procedure D using **SI-3g** (2.6

g, 10.5 mmol) to afford 2.9 g (70% yield) of **SI-4g**.  $^1\text{H}$  NMR (400 MHz,  $\text{CDCl}_3$ )  $\delta$  7.63 – 7.54 (m, 4H), 7.46 – 7.40 (m, 2H), 7.24 – 7.19 (m, 2H), 6.58 (s, 1H), 6.09 (s, 1H), 2.86 (d,  $J$  = 4.9 Hz, 3H), 2.40 (s, 3H).

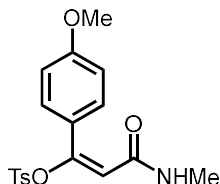

**SI-4h**

**(E)-1-(4-methoxyphenyl)-3-(methylamino)-3-oxoprop-1-en-1-yl 4-methylbenzenesulfonate (SI-4h):** Prepared according to General Procedure D using **SI-3h** (2.5 g, 12 mmol) to afford 2.2 g (60% yield) of **SI-4h**.  $^1\text{H}$  NMR (300 MHz,  $\text{CDCl}_3$ )  $\delta$  7.67 – 7.56 (m, 2H), 7.33 – 7.18 (m, 4H), 6.84 – 6.70 (m, 2H), 6.48 (s, 1H), 5.89 (s, 1H), 3.80 (s, 3H), 2.76 (d,  $J$  = 4.8 Hz, 3H), 2.42 (s, 3H).

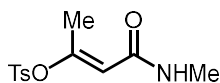

**SI-4i**

**(E)-4-(methylamino)-4-oxobut-2-en-2-yl 4-methylbenzenesulfonate (SI-4i):** Prepared according to General Procedure D using N-methyl-3-oxobutanamide (3 g, 26.1 mmol, ~70% in water) to afford 700 mg (10% yield) of **SI-4i**.  $^1\text{H}$  NMR (500 MHz,  $\text{CDCl}_3$ )  $\delta$  7.87 – 7.72 (m, 2H), 7.37 (d,  $J$  = 8.2 Hz, 2H), 6.28 (s, 1H), 5.43 (d,  $J$  = 1.3 Hz, 1H), 2.69 (d,  $J$  = 5.0 Hz, 3H), 2.46 (s, 3H), 2.13 – 2.03 (m, 3H).

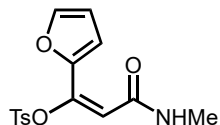

**SI-4j**

**(E)-1-(furan-2-yl)-3-(methylamino)-3-oxoprop-1-en-1-yl 4-methylbenzenesulfonate (SI-4j):** Prepared according to General Procedure D using **SI-3i** (580 mg, 3.5 mmol) to afford 388 mg (34% yield) of **SI-4j**.  $^1\text{H}$  NMR (400 MHz,  $\text{CDCl}_3$ )  $\delta$  7.82 (d,  $J$  = 8.2 Hz, 2H), 7.35 (dd,  $J$  = 18.6, 10.4 Hz, 3H), 6.48 (d,  $J$  = 3.4 Hz, 1H), 6.38 (s, 1H), 6.13 (s, 2H), 2.71 (d,  $J$  = 4.9 Hz, 3H), 2.46 (s, 3H).

**General procedure E:**  $\text{ZnCl}_2$  (2 equiv.) was dissolved in diethyl ether (1M) and cooled on an ice bath.  $\text{TMSCH}_2\text{MgCl}$  (1M in diethyl ether, 2.3 equiv.) was added as a slow stream via syringe and the ice bath was removed and stirring was continued at room temperature for one hour. Tosylate **SI-4** (1 equiv.),  $\text{PdCl}_2(\text{PPh}_3)_2$  (2 mol%) and  $\text{PPh}_3$  (1 mol%) were combined in a separate vessel and dissolved in THF (0.1 M), then transferred via syringe to the freshly formed organozinc reagent. The reaction mixture was stirred at room temperature until judged complete by TLC (~5-18 hours), at which time it was diluted with EtOAc and poured onto saturated ammonium chloride solution. The layers were separated and the aqueous layer was washed with two additional portions of EtOAc. The combined organic layers were dried over  $\text{Na}_2\text{SO}_4$ , concentrated and purified by flash column chromatography eluting with hexanes/EtOAc.

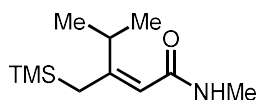

**SI-5a**

**(E)-N,4-dimethyl-3-((trimethylsilyl)methyl)pent-2-enamide (SI-5a):** Prepared according to General Procedure E using **SI-4a** (565 mg, 1.9 mmol) to afford 272 mg (67% yield) of **SI-5a**. <sup>1</sup>H NMR (300 MHz, CDCl<sub>3</sub>) δ 5.36 (s, 1H), 5.27 (s, 1H), 2.85 – 2.75 (m, 3H), 2.47 (s, 2H), 2.15 (p, *J* = 6.8 Hz, 1H), 1.05 (d, *J* = 6.8 Hz, 6H), 0.04 (s, 9H).

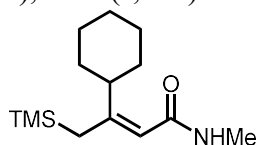

**SI-5b**

**(E)-3-cyclohexyl-N-methyl-4-(trimethylsilyl)but-2-enamide (SI-5b):** Prepared according to General Procedure E using **SI-4b** (800 mg, 2.4 mmol) to afford 480 mg (80% yield) of **SI-5b**. <sup>1</sup>H NMR (400 MHz, CDCl<sub>3</sub>) δ 5.33 (s, 1H), 5.23 (s, 1H), 2.81 (d, *J* = 4.1 Hz, 3H), 2.51 – 2.41 (m, 2H), 1.76 (dd, *J* = 24.7, 11.4 Hz, 6H), 1.32 – 1.04 (m, 5H), 0.06 (d, *J* = 3.2 Hz, 9H).

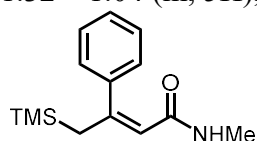

**SI-5c**

**(E)-N-methyl-3-phenyl-4-(trimethylsilyl)but-2-enamide (SI-5c):** Prepared according to General Procedure E using **SI-4c** (1.9 g, 9.0 mmol) to afford 850 mg (60% yield) of **SI-5c**. <sup>1</sup>H NMR (500 MHz, CDCl<sub>3</sub>) δ 7.38 – 7.31 (m, 5H), 5.71 (s, 1H), 5.41 (s, 1H), 2.92 – 2.84 (m, 5H), -0.12 (d, *J* = 1.6 Hz, 9H).

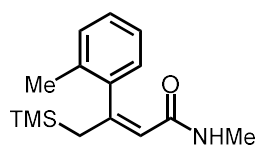

**SI-5d**

**(E)-N-methyl-3-(o-tolyl)-4-(trimethylsilyl)but-2-enamide (SI-5d):** Prepared according to General Procedure E using **SI-4d** (750 mg, 2.2 mmol) to afford 254 mg (45% yield) of **SI-5d**. <sup>1</sup>H NMR (400 MHz, CDCl<sub>3</sub>) δ 7.21 – 7.10 (m, 3H), 7.05 (d, *J* = 7.3 Hz, 1H), 5.45 (s, 1H), 5.34 (s, 1H), 2.86 (d, *J* = 4.4 Hz, 3H), 2.77 (s, 2H), 2.32 (s, 3H), -0.07 (s, 9H).

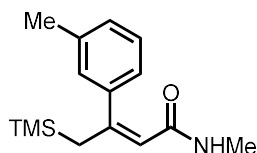

**SI-5e**

**(*E*)-N-methyl-3-(*m*-tolyl)-4-(trimethylsilyl)but-2-enamide (SI-5e):** Prepared according to General Procedure E using **SI-4e** (1.0 g, 2.9 mmol) to afford 490 mg (65% yield) of **SI-5e**. <sup>1</sup>H NMR (300 MHz, CDCl<sub>3</sub>) δ 7.23 – 7.09 (m, 4H), 5.70 (s, 1H), 5.38 (s, 1H), 2.91 – 2.83 (m, 5H), 2.36 (s, 3H), -0.11 (s, 9H).

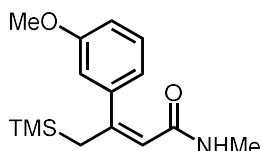

**SI-5f**

**(*E*)-3-(3-methoxyphenyl)-N-methyl-4-(trimethylsilyl)but-2-enamide (SI-5f):** Prepared according to General Procedure E using **SI-4f** (1.05 g, 2.9 mmol) to afford 570 mg (71% yield) of **SI-5f**. <sup>1</sup>H NMR (300 MHz, CDCl<sub>3</sub>) δ 7.23 (d, *J* = 7.9 Hz, 1H), 6.98 – 6.83 (m, 3H), 5.72 (s, 1H), 5.39 (s, 1H), 3.82 (s, 3H), 2.87 (d, *J* = 5.1 Hz, 5H), -0.10 (s, 9H).

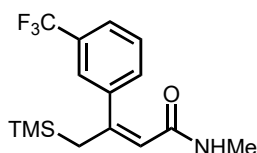

**SI-5g**

**(*E*)-N-methyl-3-(3-(trifluoromethyl)phenyl)-4-(trimethylsilyl)but-2-enamide (SI-5g):** Prepared according to General Procedure E using **SI-4g** (1.7 g, 4.3 mmol) to afford 988 mg (72% yield) of **SI-5g**. <sup>1</sup>H NMR (300 MHz, CDCl<sub>3</sub>) δ 7.68 – 7.36 (m, 4H), 5.74 (s, 1H), 5.44 (s, 1H), 3.01 – 2.80 (m, 5H), -0.11 (d, *J* = 2.0 Hz, 9H).

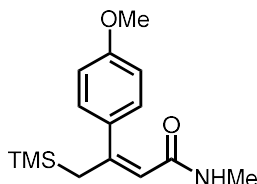

**SI-5h**

**(*E*)-3-(4-methoxyphenyl)-N-methyl-4-(trimethylsilyl)but-2-enamide (SI-5h):** Prepared according to General Procedure E using **SI-4h** (2.1 g, 5.8 mmol) to afford 776 mg (48% yield) of **SI-5h**. <sup>1</sup>H NMR (400 MHz, CDCl<sub>3</sub>) δ 7.32 (d, *J* = 8.7 Hz, 2H), 6.86 (d, *J* = 8.8 Hz, 2H), 5.68 (s, 1H), 5.36 (s, 1H), 3.82 (s, 3H), 2.93 – 2.82 (m, 5H), -0.11 (s, 9H).

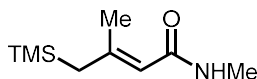

**SI-5i**

**(*E*)-N,3-dimethyl-4-(trimethylsilyl)but-2-enamide (SI-5i):** Prepared according to General Procedure E using **SI-4i** (700 mg, 2.6 mmol) to afford 403 mg (85% yield) of **SI-5i**. <sup>1</sup>H NMR (500 MHz, CDCl<sub>3</sub>) δ 5.38 (s, 1H), 5.19 (s, 1H), 2.80 (d, *J* = 4.1 Hz, 3H), 2.45 (s, 2H), 1.80 (s, 3H), 0.06 (s, 9H).

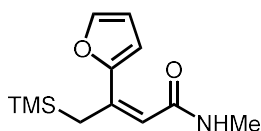

**SI-5j**

**(*E*)-3-(furan-2-yl)-N-methyl-4-(trimethylsilyl)but-2-enamide (SI-5j):** Prepared according to General Procedure E using **SI-4j** (388 mg, 1.2 mmol) to afford 204 mg (70% yield) of **SI-5j**. <sup>1</sup>H NMR (500 MHz, CDCl<sub>3</sub>) δ 7.39 (d, *J* = 1.4 Hz, 1H), 6.49 (d, *J* = 3.4 Hz, 1H), 6.42 (dd, *J* = 3.4, 1.8 Hz, 1H), 6.11 (s, 1H), 5.45 (br s, 1H), 2.86 (d, *J* = 4.9 Hz, 3H), 2.75 (s, 2H), 0.06 – 0.01 (m, 9H).

**General procedure F:** ZnCl<sub>2</sub> (5 equiv.) and LiAlH<sub>4</sub> (10 equiv.) were dissolved in diethyl ether (0.2 M) and stirred at room temperature for 3 hours, at which point the slurry was filtered through an oven-dried fritted funnel into a dry round-bottom flask. The filter cake was washed with additional diethyl ether (equal volume to the initial portion, such that the final concentration of the substrate is 0.1 M). *Safety note:* the resulting filter cake can readily ignite and should be quenched with caution. The filtrate was cooled to 0 °C and amide **SI-5** (1 equiv.) was added as a solid and the reaction mixture was allowed to warm to room temperature and stirred for 48 hours. The mixture was quenched by the Fieser workup (sequential addition of 1 mL H<sub>2</sub>O/g LiAlH<sub>4</sub>, 1 mL 15% aqueous NaOH/g LiAlH<sub>4</sub> and 3 mL H<sub>2</sub>O/g LiAlH<sub>4</sub>). The mixture was stirred for 30 minutes, then dried with excess MgSO<sub>4</sub> and stirred another 30-90 minutes. The solids were removed by filtration and the filter cake washed with diethyl ether. The solvent was removed by rotary evaporator. The crude material was taken up in DCM (0.3 M) and 2-chloroacetic acid (1 equiv.) and DMAP (0.1 equiv.) were added and stirred at room temperature until judged complete by TLC analysis (<1 hour). The reaction mixture was diluted with DCM and 1M HCl and the layers were separated. The aqueous layer was extracted with two additional portions of DCM and the combined organic layers were dried over Na<sub>2</sub>SO<sub>4</sub>, concentrated by rotary evaporator, and purified by flash column chromatography eluting with hexanes/EtOAc. The yields of the products reported here are of the material isolated from column chromatography and contained minor unidentified impurities. The materials were further purified by reverse phase chromatography on a semi-preparative HPLC column and the characterization data is reported based on this further purified material. Note: amide rotamers lead to the doubling of many peaks in the <sup>13</sup>C NMR spectra and the full list of peaks is reported. When non-overlapping peaks chemical shift round to the same value, they are reported followed by “(2)”.

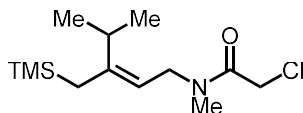

**13S**

**(*E*)-2-chloro-N-methyl-N-(4-methyl-3-((trimethylsilyl)methyl)pent-2-en-1-yl)acetamide (13S):** Prepared according to General Procedure F using **SI-5a** (163 mg, 0.76 mmol) to afford 86 mg (40% yield) of **13S**. <sup>1</sup>H NMR (500 MHz, CDCl<sub>3</sub>) δ 5.04 – 4.92 (m, 1H), 4.12 – 4.01 (m, 2H), 3.97 (d, *J* = 6.9 Hz, 1H), 3.87 (d, *J* = 6.3 Hz, 1H), 2.94 (dd, *J* = 19.8, 1.3 Hz, 3H), 2.06 (h, *J* = 6.9 Hz, 1H), 1.62 (d, *J* = 13.2 Hz, 2H), 1.02 (ddd, *J* = 6.9, 3.2, 1.3 Hz, 6H), 0.03 (dd, *J* = 9.9, 1.3 Hz, 9H). <sup>13</sup>C NMR (126 MHz, CDCl<sub>3</sub>) δ 166.5, 166.1, 149.8, 149.7, 112.7, 112.4, 48.7, 45.6,

41.7, 41.3, 35.6 (2), 34.5, 33.8, 22.5, 22.2, 22.1 (2), -0.6 (2). **IR** (cm<sup>-1</sup>): 2957, 1648, 1461, 1403, 1248, 1155, 1105, 893, 854, 837. **HRMS**: Calculated for C<sub>13</sub>H<sub>27</sub>ClNOSi [M+H]<sup>+</sup>: 276.1545. Found [M+H]<sup>+</sup>: 276.1541.

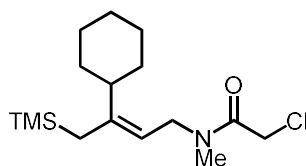

**14S**

**(E)-2-chloro-N-(3-cyclohexyl-4-(trimethylsilyl)but-2-en-1-yl)-N-methylacetamide (14S)**: Prepared according to General Procedure F using **SI-5b** (90 mg, 0.36 mmol) to afford 30 mg (27% yield) of **14S**. **<sup>1</sup>H NMR** (500 MHz, CDCl<sub>3</sub>) δ 4.89 (dt, *J* = 11.5, 6.7 Hz, 1H), 4.00 (d, *J* = 14.4 Hz, 2H), 3.91 (d, *J* = 6.9 Hz, 1H), 3.82 (d, *J* = 6.3 Hz, 1H), 2.88 (d, *J* = 22.9 Hz, 3H), 1.80 – 1.46 (m, 8H), 1.32 – 0.95 (m, 5H), -0.03 (d, *J* = 10.4 Hz, 9H). **<sup>13</sup>C NMR** (126 MHz, CDCl<sub>3</sub>) δ 166.3, 165.9, 148.7 (2), 113.3, 112.9, 48.5, 46.4, 46.3, 45.4, 41.6, 41.2, 34.3, 33.5, 32.8, 32.7, 27.0, 26.9, 26.4, 26.3, 22.6, 22.2, -0.8 (2). **IR** (cm<sup>-1</sup>): 2926, 2852, 1661, 1449, 1328, 854, 839. **HRMS**: Calculated for C<sub>16</sub>H<sub>31</sub>ClNOSi [M+H]<sup>+</sup>: 316.1858. Found [M+H]<sup>+</sup>: 316.1837.

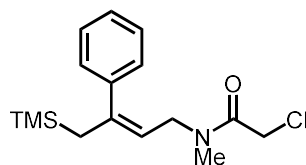

**1**

**(E)-2-chloro-N-methyl-N-(3-phenyl-4-(trimethylsilyl)but-2-en-1-yl)acetamide (1)**: Prepared according to General Procedure F using **SI-5c** (500 mg, 2.0 mmol) to afford 312 mg (50% yield) of **1**. **<sup>1</sup>H NMR** (400 MHz, CDCl<sub>3</sub>) δ 7.32 – 7.15 (m, 5H), 5.43 – 5.33 (m, 1H), 4.09 (d, *J* = 7.0 Hz, 1H), 4.05 – 3.99 (m, 3H), 2.96 (d, *J* = 22.9 Hz, 3H), 2.00 (d, *J* = 21.2 Hz, 2H), -0.19 (d, *J* = 9.4 Hz, 9H). **<sup>13</sup>C NMR** (101 MHz, CDCl<sub>3</sub>) δ 166.5, 166.2, 144.0, 143.4, 143.3, 143.2, 128.4, 128.3, 127.7, 127.4, 126.7, 126.6, 119.5, 119.3, 49.3, 46.5, 41.6, 41.3, 35.0, 34.0, 22.0, 21.7, -0.9, -1.0. **IR** (cm<sup>-1</sup>): 2359, 1659, 1491, 1443, 1249, 909, 856, 841. **HRMS**: Calculated for C<sub>16</sub>H<sub>25</sub>ClNOSi [M+H]<sup>+</sup>: 310.1388. Found [M+H]<sup>+</sup>: 310.1400.

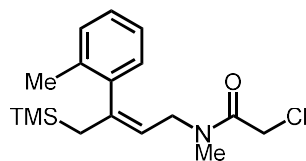

**5S**

**(E)-2-chloro-N-methyl-N-(3-(o-tolyl)-4-(trimethylsilyl)but-2-en-1-yl)acetamide (5S)**: Prepared according to General Procedure F using **SI-5d** (700 mg, 2.6 mmol) to afford 47 mg (6% yield) of **5S**. **<sup>1</sup>H NMR** (500 MHz, CDCl<sub>3</sub>) δ 7.21 – 7.04 (m, 4H), 5.43 (d, *J* = 6.7 Hz, 1H), 4.20 – 4.04 (m, 4H), 3.02 (d, *J* = 27.5 Hz, 3H), 2.35 (d, *J* = 6.7 Hz, 3H), 2.04 (d, *J* = 26.4 Hz, 2H), -0.13 (d, *J* = 12.2 Hz, 9H). **<sup>13</sup>C NMR** (126 MHz, CDCl<sub>3</sub>) δ 166.6, 166.3, 144.0, 143.4, 143.3, 138.0, 137.8, 128.5, 128.3, 128.2 (2), 127.5, 127.3, 123.8, 123.7, 119.3, 119.1, 49.3, 46.5, 41.6, 41.3, 35.0, 34.0, 22.0, 21.7, 21.6, -0.9 (2). **IR** (cm<sup>-1</sup>): 2952, 1733, 1651, 1403, 1248, 840. **HRMS**: Calculated for C<sub>17</sub>H<sub>27</sub>ClNOSi [M+H]<sup>+</sup>: 324.1545. Found [M+H]<sup>+</sup>: 324.1560.

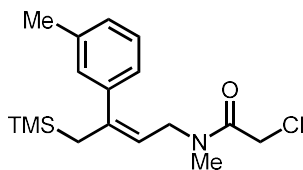

**7S**

**(*E*)-2-chloro-N-methyl-N-(3-(*m*-tolyl)-4-(trimethylsilyl)but-2-en-1-yl)acetamide (7S):**

Prepared according to General Procedure F using **SI-5e** (200 mg, 0.77 mmol) to afford 60 mg (24% yield) of **7S**.  $^1\text{H NMR}$  (500 MHz,  $\text{CDCl}_3$ )  $\delta$  7.25 – 7.03 (m, 4H), 5.43 (t,  $J$  = 6.9 Hz, 1H), 4.15 (d,  $J$  = 7.0 Hz, 1H), 4.12 – 4.04 (m, 3H), 3.02 (d,  $J$  = 27.4 Hz, 3H), 2.35 (d,  $J$  = 6.7 Hz, 3H), 2.04 (d,  $J$  = 26.2 Hz, 2H), -0.12 (d,  $J$  = 12.0 Hz, 9H).  $^{13}\text{C NMR}$  (126 MHz,  $\text{CDCl}_3$ )  $\delta$  166.3, 144.0, 143.4, 143.3, 138.0, 137.8, 128.5, 128.3, 128.2, 128.1, 127.5, 127.3, 123.8, 123.7, 119.3, 119.1, 49.3, 46.5, 41.6, 41.3, 35.0, 34.0, 22.0, 21.7, 21.6, -0.9 (2). **IR** ( $\text{cm}^{-1}$ ): 2952, 1733, 1614, 1408, 1247, 839. **HRMS**: Calculated for  $\text{C}_{17}\text{H}_{27}\text{ClNOSi}$   $[\text{M}+\text{H}]^+$ : 324.1545. Found  $[\text{M}+\text{H}]^+$ : 324.1560.

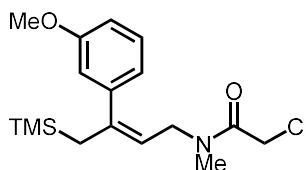

**6S**

**(*E*)-2-chloro-N-(3-(3-methoxyphenyl)-4-(trimethylsilyl)but-2-en-1-yl)-N-methylacetamide (6S):**

Prepared according to General Procedure F using **SI-5f** (485 mg, 1.8 mmol) to afford 40 mg (7% yield) of **6S**.  $^1\text{H NMR}$  (500 MHz,  $\text{CDCl}_3$ )  $\delta$  7.24 – 7.17 (m, 1H), 6.93 (dt,  $J$  = 7.8, 1.2 Hz, 1H), 6.86 (dt,  $J$  = 9.1, 2.2 Hz, 1H), 6.80 (d,  $J$  = 2.8 Hz, 1H), 5.50 – 5.38 (m, 1H), 4.14 (d,  $J$  = 6.9 Hz, 1H), 4.08 (t,  $J$  = 7.7 Hz, 3H), 3.81 (d,  $J$  = 4.0 Hz, 3H), 3.01 (d,  $J$  = 29.3 Hz, 3H), 2.03 (d,  $J$  = 27.4 Hz, 2H), -0.12 (d,  $J$  = 12.0 Hz, 9H).  $^{13}\text{C NMR}$  (126 MHz,  $\text{CDCl}_3$ )  $\delta$  166.5, 166.3, 159.7, 159.6, 145.5, 144.9, 143.1, 143.0, 129.4, 129.2, 119.6, 119.3, 119.3, 119.2, 112.8, 112.7, 112.6 (2z), 55.4, 49.3, 46.4, 41.5, 41.3, 35.0, 34.0, 22.1, 21.8, -0.9, -1.0. **IR** ( $\text{cm}^{-1}$ ): 2952, 1750, 1652, 1597, 1464, 1285, 1247, 1043, 850. **HRMS**: Calculated for  $\text{C}_{17}\text{H}_{27}\text{ClNO}_2\text{Si}$   $[\text{M}+\text{H}]^+$ : 340.1494. Found  $[\text{M}+\text{H}]^+$ : 340.1509.

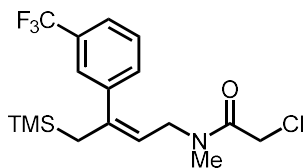

**15**

**(*E*)-2-chloro-N-methyl-N-(3-(3-(trifluoromethyl)phenyl)-4-(trimethylsilyl)but-2-en-1-yl)acetamide (15):**

Prepared according to General Procedure F using **SI-5g** (300 mg, 0.95 mmol) to afford 130 mg (36% yield) of **15S**.  $^1\text{H NMR}$  (500 MHz,  $\text{CDCl}_3$ )  $\delta$  7.57 (d,  $J$  = 7.2 Hz, 1H), 7.52 (q,  $J$  = 7.9 Hz, 2H), 7.43 (dt,  $J$  = 15.2, 7.7 Hz, 1H), 5.49 (q,  $J$  = 6.8 Hz, 1H), 4.16 (d,  $J$  = 6.9 Hz, 1H), 4.09 (d,  $J$  = 3.8 Hz, 3H), 3.03 (d,  $J$  = 38.2 Hz, 3H), 2.07 (d,  $J$  = 26.2 Hz, 2H), -0.12 (d,  $J$  = 12.1 Hz, 9H).  $^{13}\text{C NMR}$  (126 MHz,  $\text{CDCl}_3$ )  $\delta$  166.4, 166.3, 144.6, 144.0, 141.9 (2), 130.9,

130.7 (2), 130.5, 129.9, 129.8, 128.9, 128.7, 125.2, 124.3 (2), 124.0 (2), 123.9, 123.3 (3), 123.2 (3), 123.1, 121.0, 120.8, 49.1, 46.5, 41.4, 41.1, 35.1, 33.9, 22.0, 21.6, -1.0, -1.1. **<sup>19</sup>F NMR** (470 MHz, CDCl<sub>3</sub>) δ -62.6 (2; rotamers). **IR** (cm<sup>-1</sup>): 2954, 1654, 1488, 1434, 1334, 1249, 1165, 1123, 1073, 841. **HRMS**: Calculated for C<sub>17</sub>H<sub>24</sub>ClF<sub>3</sub>NO<sub>2</sub>Si [M+H]<sup>+</sup>: 378.1262 Found [M+H]<sup>+</sup>: 378.1252.

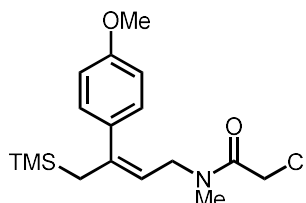

**4S**

**(E)-2-chloro-N-(3-(4-methoxyphenyl)-4-(trimethylsilyl)but-2-en-1-yl)-N-methylacetamide (4S)**: Prepared according to General Procedure F using **SI-5h** (700 mg, 2.5 mmol) to afford 315 mg (37% yield) of **4S**. **<sup>1</sup>H NMR** (400 MHz, CDCl<sub>3</sub>) δ 7.29 – 7.24 (m, 2H), 6.89 – 6.79 (m, 2H), 5.38 (t, *J* = 6.7 Hz, 1H), 4.18 – 4.05 (m, 4H), 3.81 (d, *J* = 2.9 Hz, 3H), 3.02 (d, *J* = 23.0 Hz, 3H), 2.07 – 1.95 (m, 2H), -0.12 (d, *J* = 10.0 Hz, 9H). **<sup>13</sup>C NMR** (101 MHz, CDCl<sub>3</sub>) δ 166.5, 166.2, 159.3, 159.1, 142.6, 142.5, 136.4, 135.7, 127.7, 127.6, 118.2, 117.9, 113.8, 113.6, 55.4 (2), 49.4, 46.5, 41.6, 41.3, 34.9, 34.0, 21.9, 21.6, -0.9 (2). **IR** (cm<sup>-1</sup>): 2951, 1652, 1606, 1509, 1243, 1178, 1033, 830, 802. **HRMS**: Calculated for C<sub>17</sub>H<sub>27</sub>ClNO<sub>2</sub>Si [M+H]<sup>+</sup>: 340.1494. Found [M+H]<sup>+</sup>: 340.1485.

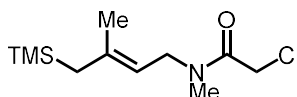

**12S**

**(E)-2-chloro-N-methyl-N-(3-methyl-4-(trimethylsilyl)but-2-en-1-yl)acetamide (12S)**: Prepared according to General Procedure F using **SI-5i** (400 mg, 2.2 mmol) to afford 144 mg (27% yield) of **12S**. **<sup>1</sup>H NMR** (400 MHz, CDCl<sub>3</sub>) δ 5.05 – 4.96 (m, 1H), 4.06 (d, *J* = 5.6 Hz, 2H), 3.93 (d, *J* = 7.0 Hz, 1H), 3.86 (d, *J* = 6.4 Hz, 1H), 2.96 (d, *J* = 28.0 Hz, 3H), 1.79 – 1.70 (m, 3H), 1.59 (d, *J* = 18.7 Hz, 2H), 0.05 (d, *J* = 8.9 Hz, 9H). **<sup>13</sup>C NMR** (101 MHz, CDCl<sub>3</sub>) δ 166.5, 166.1, 139.3, 139.2, 116.5, 116.1, 48.6, 45.8, 41.6, 41.3, 34.8, 33.8, 26.4 (2), 24.0, 23.8, -0.7 (2). **IR** (cm<sup>-1</sup>): 2953, 1647, 1403, 1247, 836. **HRMS**: Calculated for C<sub>11</sub>H<sub>23</sub>ClNOSi [M+H]<sup>+</sup>: 248.1232. Found [M+H]<sup>+</sup>: 248.1222.

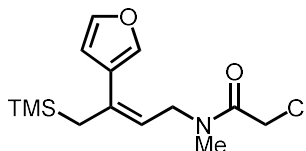

**15S**

**(E)-2-chloro-N-(3-(furan-3-yl)-4-(trimethylsilyl)but-2-en-1-yl)-N-methylacetamide (15S)**: Prepared according to General Procedure F using **SI-5j** (204 mg, 0.84 mmol) to afford 40 mg (16% yield) of **15S**. **<sup>1</sup>H NMR** (500 MHz, CDCl<sub>3</sub>) δ 7.33 (d, *J* = 10.8 Hz, 1H), 6.36 (ddd, *J* = 9.9, 3.1, 1.8 Hz, 1H), 6.25 (dd, *J* = 10.5, 3.3 Hz, 1H), 5.83 (t, *J* = 6.9 Hz, 1H), 4.14 (d, *J* = 7.2 Hz,

1H), 4.10 – 4.03 (m, 3H), 3.02 (d,  $J = 36.1$  Hz, 3H), 1.92 (d,  $J = 30.9$  Hz, 2H), -0.00 (d,  $J = 12.7$  Hz, 9H).  **$^{13}\text{C}$  NMR** (126 MHz,  $\text{CDCl}_3$ )  $\delta$  166.5, 166.3, 155.4, 154.8, 142.0, 141.6, 131.7, 131.4, 116.0, 115.8, 111.3, 111.2, 106.7, 106.3, 48.5, 45.8, 41.6, 41.3, 35.1, 34.0, 19.0, 18.8, -0.8, -0.9. **IR** ( $\text{cm}^{-1}$ ): 2953, 1654, 1488, 1404, 1165, 1111, 855, 841. **HRMS**: Calculated for  $\text{C}_{14}\text{H}_{23}\text{ClNO}_2\text{Si}$   $[\text{M}+\text{H}]^+$ : 300.1187 Found  $[\text{M}+\text{H}]^+$ : 300.1183.

## Synthesis of Aryl-Substituted 6-membered substrate

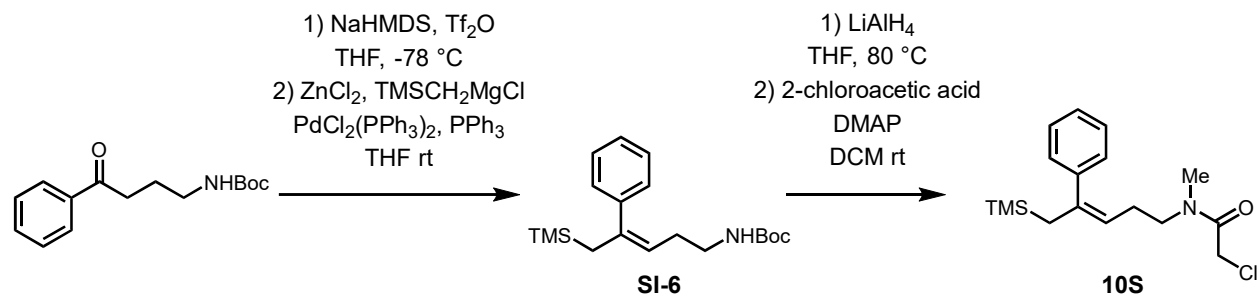

**tert-butyl (E)-(4-phenyl-5-(trimethylsilyl)pent-3-en-1-yl)carbamate (SI-6):** *tert*-butyl (4-oxo-4-phenylbutyl)carbamate<sup>11</sup> (500 mg, 1.9 mmol) and  $\text{PhNTf}_2$  were dissolved in THF (10 mL) and cooled to  $-78\text{ }^\circ\text{C}$  and NaHMDS (2M in THF, 2 mL, 4.0 mmol) was added slowly dropwise. The resulting mixture was stirred for 30 minutes and quenched with saturated aqueous ammonium chloride and extracted with two portions of EtOAc. The combined organic layers were dried over  $\text{Na}_2\text{SO}_4$  and concentrated. The triflate was crudely purified by rapid flash column chromatography eluting with hexanes/EtOAc to afford 250 mg (33% yield) of material that was not analyzed further. Anhydrous  $\text{ZnCl}_2$  (172 mg, 1.3 mmol) was dissolved in THF (1.3 mL) and cooled to  $0\text{ }^\circ\text{C}$  on an ice bath before addition of trimethylsilylmethylmagnesium chloride (1 M, 1.5 mL, 1.5 mmol). After stirring for 30 minutes,  $\text{PdCl}_2(\text{PPh}_3)_2$  and (22 mg, 5 mol%),  $\text{PPh}_3$  (4 mg, 2.5 mol%) were added, followed by a solution of the triflate in THF (6 mL). The reaction mixture was stirred overnight with warming to room temperature and quenched with saturated ammonium chloride solution. The aqueous layer was extracted with 3 portions of EtOAc, dried over  $\text{Na}_2\text{SO}_4$  and concentrated by rotary evaporator. Flash column chromatography eluting with hexanes/EtOAc afforded 79 mg (37% yield from the triflate) of **SI-6**.  $^1\text{H}$  NMR (400 MHz,  $\text{CDCl}_3$ )  $\delta$  7.34 – 7.27 (m, 4H), 7.25 – 7.19 (m, 1H), 5.43 (t,  $J = 7.1\text{ Hz}$ , 1H), 3.28 – 3.17 (m, 2H), 2.32 (q,  $J = 6.9\text{ Hz}$ , 2H), 2.00 (s, 2H), 1.45 (s, 9H),  $-0.15$  (s, 10H).

**(E)-2-chloro-N-methyl-N-(4-phenyl-5-(trimethylsilyl)pent-3-en-1-yl)acetamide (10S):** **SI-6** (79 mg, 0.24 mmol) was dissolved in THF (10 mL) and  $\text{LiAlH}_4$  (36 mg, 0.95 mmol) were added at  $0\text{ }^\circ\text{C}$ . The reaction mixture was heated to reflux overnight. After cooling on an ice bath, the reaction was diluted with diethyl ether and quenched with sodium sulfate decahydrate and filtered, washing the filter cake with ether. The solvent was removed by rotary evaporator and the crude material was redissolved in DCM (10 mL). 2-chloroacetic anhydride (49 mg, 0.28 mmol) and DMAP (6 mg, 0.47 mmol) were added sequentially and the reaction mixture was stirred until judged complete by TLC (approximately 30 minutes). The mixture was poured onto 1 M HCl solution and diluted with additional DCM. The aqueous layer was washed with 2 additional portions of DCM and the combined organic layers were dried over  $\text{Na}_2\text{SO}_4$  and concentrated by rotary evaporator. Flash column chromatography afforded 23 mg (29% yield) of **10S**. Further purification by preparative HPLC afforded an analytically pure sample and material that was used for the biocatalytic cyclization. Note: various impurities are present and unable to be separated by flash chromatography. One decomposition pathway was identified: a Peterson-

type elimination to form a diene<sup>9</sup>. **<sup>1</sup>H NMR** (400 MHz, CDCl<sub>3</sub>)  $\delta$  7.33 – 7.27 (m, 4H), 7.25 – 7.20 (m, 1H), 5.40 (dt,  $J$  = 21.6, 7.2 Hz, 1H), 4.09 (d,  $J$  = 3.9 Hz, 2H), 3.53 – 3.38 (m, 2H), 3.06 (d,  $J$  = 37.0 Hz, 3H), 2.50 – 2.34 (m, 2H), 2.00 (d,  $J$  = 3.1 Hz, 2H), -0.15 (d,  $J$  = 2.8 Hz, 9H). **<sup>13</sup>C NMR** (101 MHz, CDCl<sub>3</sub>)  $\delta$  166.8, 166.6, 144.6, 144.2, 142.0, 140.8, 128.5, 128.3, 128.2, 127.7, 127.2, 126.9, 126.7, 126.6, 121.2, 119.8, 50.3, 48.7, 41.5, 40.9, 36.3, 34.1, 28.3, 27.1, 21.7, 21.4, -0.9, -1.0. **IR** (cm<sup>-1</sup>): 2951, 1650, 1492, 1405, 1247, 1154, 1028, 978. **HRMS**: Calculated for C<sub>17</sub>H<sub>27</sub>ClNOSi [M+H]<sup>+</sup>: 324.1545. Found [M+H]<sup>+</sup>: 325.1537.

## **Biocatalytic Reaction**

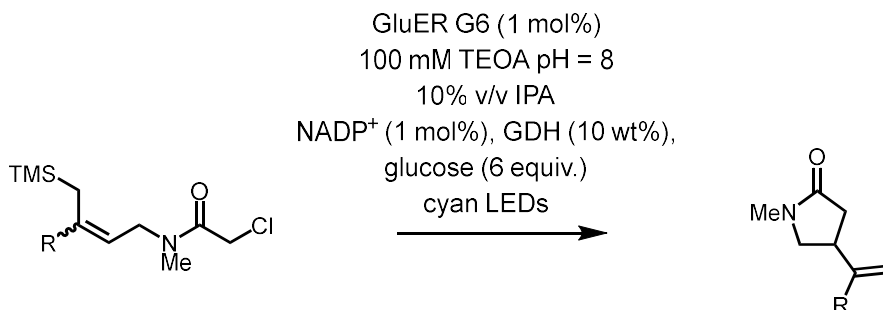

**General procedure for biocatalytic cyclization:** Allylsilane substrate (20  $\mu\text{mol}$ , 1 equiv.) was weighed into a shell vial and imported into a Coy anaerobic chamber. Inside the anaerobic chamber, a 10x stock solution of “turnover mix” was prepared by dissolving GDH-105 (10 wt%/rxn), NADP<sup>+</sup> (2 mol%/rxn) and glucose (2 equiv./reaction) in 1 mL of 100 mM buffer. 100  $\mu\text{L}$  of this solution was transferred to a shell vial equipped with a cross stir bar and diluted with 100 mM buffer (836  $\mu\text{L}$ ). Two 100 nmol aliquots of GluER enzyme (33  $\mu\text{L}$  each) was added and the mixture was gently vortexed until the yellow color faded and the mixture became clear. Substrate was dissolved in isopropanol (55  $\mu\text{L}$ ) and transferred via pipette to the reaction mixture. The substrate vial was rinsed with an additional 55  $\mu\text{L}$  of isopropanol that was then transferred to the reaction mixture. The vial was capped with a septum, removed from the anaerobic chamber, and irradiated with cyan LEDs at room temperature (with fan cooling to offset the heat from the LEDs) for 48 hours. At this time, the reaction mixture was removed from the light source and 100  $\mu\text{L}$  of a 10 mg/mL 1,3,5-trimethoxybenzene (TMB) stock solution (total 1 mg TMB/reaction) was added. The reaction mixture was diluted with approximately 1 mL of EtOAc and stirred 30-60 minutes at room temperature. The reaction mixture was centrifuged (Genevac) to facilitate separation of the layers. The organic layer was removed and the aqueous layer was extracted with five additional portions of EtOAc, centrifuging as needed if an emulsion was formed. The combined organic layers were concentrated by rotary evaporator or Genevac and yields were calculated based on the ratio of product to TMB. Each reaction was performed in duplicate and the reported yield is the average of the two replicates. The crude reaction products were analyzed by chiral HPLC to determine e.r. The absolute configuration (*S*) was assigned by analogy to the reductive cyclization product previously studied in our laboratories using this enzyme<sup>1,2</sup>.

Note: 33  $\mu\text{L}$  aliquots 100 nmol aliquots were commonly used in this study but not exclusively. For different concentrations, an aliquot equivalent to 100 nmol protein was used and the volume of buffer (836  $\mu\text{L}$  in the above procedure) was increased or decreased accordingly.

For unsubstituted and alkyl-substituted products (**8-14**), multiple biocatalytic reactions were performed in tandem and combined for HPLC purification to isolate an analytically pure sample. The characterization data from these samples is reported here. For aryl-substituted products (**2, 4-7**), characterization data and HPLC conditions are reported under the racemic synthesis section below (“Synthesis of Aryl-Substituted Product Standards”).

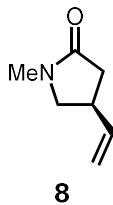

**1-methyl-4-vinylpyrrolidin-2-one (8):** 56% yield (Average of two reactions performed according to general procedure for biocatalytic cyclization with 4.6 mg of **8S**). 70:30 e.r. **<sup>1</sup>H NMR** (400 MHz, CDCl<sub>3</sub>) δ 5.82 (ddd, *J* = 17.4, 10.2, 7.7 Hz, 1H), 5.17 – 5.03 (m, 2H), 3.50 (dd, *J* = 9.6, 8.2 Hz, 1H), 3.16 (dd, *J* = 9.7, 6.9 Hz, 1H), 3.01 (q, *J* = 8.0 Hz, 1H), 2.84 (s, 3H), 2.56 (dd, *J* = 16.8, 8.9 Hz, 1H), 2.26 (dd, *J* = 16.8, 8.1 Hz, 1H). **<sup>13</sup>C NMR** (126 MHz, CDCl<sub>3</sub>) δ 174.1, 138.9, 115.8, 54.8, 37.2, 36.0, 29.7. **IR** (cm<sup>-1</sup>): 2954, 2922, 2852, 1733, 1683, 1463, 1264, 915, 812. **HRMS**: Calculated for C<sub>7</sub>H<sub>12</sub>NO [M+H]<sup>+</sup>: 126.0913. Found [M+H]<sup>+</sup>: 126.0913. **HPLC**: AS-H, 20% isopropanol in hexanes, 45 minute method.

When using allylsulfone starting material **8S-b** (6.0 mg) as a substrate in the general procedure for biocatalytic cyclization, 25% yield is observed (68:32 e.r.).

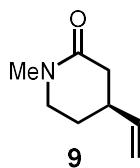

**1-methyl-4-vinylpiperidin-2-one (9):** 75% yield (Average of two reactions performed according to general procedure for biocatalytic cyclization using 5 mg of **9S**). 57:43 e.r. **<sup>1</sup>H NMR** (500 MHz, CDCl<sub>3</sub>) δ 5.85 – 5.71 (m, 1H), 5.11 – 4.99 (m, 2H), 3.36 – 3.26 (m, 2H), 2.94 (s, 3H), 2.52 (dtd, *J* = 13.8, 4.5, 2.1 Hz, 2H), 2.20 (dd, *J* = 18.5, 11.5 Hz, 1H), 1.95 (dtt, *J* = 13.6, 4.6, 1.8 Hz, 1H), 1.70 – 1.58 (m, 1H). **<sup>13</sup>C NMR** (126 MHz, CDCl<sub>3</sub>) δ 169.3, 140.4, 114.4, 48.8, 37.5, 36.7, 34.6, 28.8. **IR** (cm<sup>-1</sup>): 3079, 2933, 1635, 1504, 1447, 1700, 1337, 1252, 913. **HRMS**: Calculated for C<sub>8</sub>H<sub>14</sub>NO [M+H]<sup>+</sup>: 140.1070. Found [M+H]<sup>+</sup>: 140.1070. **HPLC**: AS-H, 20% isopropanol in hexanes, 70 minute method.

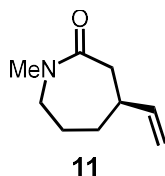

**1-methyl-4-vinylazepan-2-one (11):** 49% yield (Average of two reactions performed according to general procedure for biocatalytic cyclization with 5.2 mg **11S**). 61:39 e.r. **<sup>1</sup>H NMR** (500 MHz, CDCl<sub>3</sub>) δ 5.79 (ddd, *J* = 17.2, 10.4, 6.8 Hz, 1H), 5.09 – 4.92 (m, 2H), 3.48 (ddd, *J* = 15.1, 10.3, 1.2 Hz, 1H), 3.28 – 3.18 (m, 1H), 2.99 (s, 3H), 2.58 – 2.55 (m, 2H), 2.40 – 2.26 (m, 1H), 2.01 – 1.91 (m, 1H), 1.90 – 1.79 (m, 1H), 1.62 – 1.55 (m, 1H), 1.52 – 1.41 (m, 1H). **<sup>13</sup>C NMR** (126 MHz, CDCl<sub>3</sub>) δ 174.3, 142.5, 113.4, 51.3, 42.4, 38.0, 36.0 (2), 26.9. **IR** (cm<sup>-1</sup>): 2926, 1642, 1491, 1396, 1220, 1061, 912. **HRMS**: Calculated for C<sub>9</sub>H<sub>16</sub>NO [M+H]<sup>+</sup>: 154.1226. Found [M+H]<sup>+</sup>: 154.1227. **HPLC**: AS-H, 20% isopropanol in hexanes, 45 minute method.

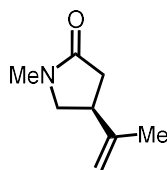

12

**1-methyl-4-(prop-1-en-2-yl)pyrrolidin-2-one (12):** 50% yield (Average of two reactions performed with 4.6 mg **12S** according to general procedure for biocatalytic cyclization with 5.0 mg of **12S**). 76:24 e.r.  $^1\text{H}$  NMR (500 MHz,  $\text{CDCl}_3$ )  $\delta$  4.86 – 4.74 (m, 2H), 3.49 (dd,  $J$  = 9.7, 8.3 Hz, 1H), 3.23 (dd,  $J$  = 9.7, 7.2 Hz, 1H), 3.06 – 2.96 (m, 1H), 2.86 (s, 3H), 2.53 (dd,  $J$  = 16.8, 9.0 Hz, 1H), 2.34 (dd,  $J$  = 16.8, 8.5 Hz, 1H).  $^{13}\text{C}$  NMR (126 MHz,  $\text{CDCl}_3$ )  $\delta$  174.3, 144.7, 111.2, 53.8, 38.7, 35.9, 29.7, 20.2. IR ( $\text{cm}^{-1}$ ): 3080, 2925, 2857, 1694, 1500, 1436, 1401, 1235, 1131, 995. HRMS: Calculated for  $\text{C}_8\text{H}_{14}\text{NO}$   $[\text{M}+\text{H}]^+$ : 140.1070. Found  $[\text{M}+\text{H}]^+$ : 140.1061. HPLC: AS-H, 20% isopropanol in hexanes, 45 minute method.

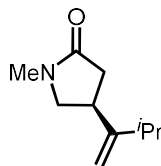

13

**1-methyl-4-(3-methylbut-1-en-2-yl)pyrrolidin-2-one (13):** 69% yield (Average of two reactions performed according to general procedure for biocatalytic cyclization using 5.5 mg of **13S**). 91:9 e.r.  $^1\text{H}$  NMR (400 MHz,  $\text{CDCl}_3$ )  $\delta$  4.89 (d,  $J$  = 1.0 Hz, 1H), 4.81 (d,  $J$  = 1.2 Hz, 1H), 3.51 (dd,  $J$  = 9.5, 8.2 Hz, 1H), 3.23 (dd,  $J$  = 9.5, 7.4 Hz, 1H), 3.07 – 2.94 (m, 1H), 2.85 (s, 3H), 2.55 (dd,  $J$  = 16.6, 8.8 Hz, 1H), 2.34 (dd,  $J$  = 16.7, 8.8 Hz, 1H), 2.28 – 2.14 (m, 1H), 1.06 (d,  $J$  = 6.8 Hz, 6H).  $^{13}\text{C}$  NMR (126 MHz,  $\text{CDCl}_3$ )  $\delta$  174.2, 156.4, 107.1, 55.3, 37.6, 36.2, 33.5, 29.7, 22.4, 22.3. IR ( $\text{cm}^{-1}$ ): 2961, 2873, 1693, 1501, 1434, 1401, 1381, 1266, 1130, 1101, 992, 893. HRMS: Calculated for  $\text{C}_{10}\text{H}_{18}\text{NO}$   $[\text{M}+\text{H}]^+$ : 168.1383. Found  $[\text{M}+\text{H}]^+$ : 168.1373. HPLC: AS-H, 20% isopropanol in hexanes, 60 minute method.

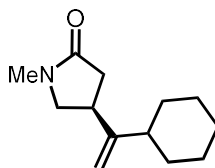

14

**4-(1-cyclohexylvinyl)-1-methylpyrrolidin-2-one (14):** 41% yield (Average of two reactions performed according to general procedure for biocatalytic cyclization with 6.3 mg **14S**). 97:3 e.r.  $^1\text{H}$  NMR (500 MHz,  $\text{CDCl}_3$ )  $\delta$  4.86 (s, 1H), 4.81 (d,  $J$  = 1.0 Hz, 1H), 3.49 (dd,  $J$  = 9.5, 8.2 Hz, 1H), 3.21 (dd,  $J$  = 9.5, 7.5 Hz, 1H), 3.05 – 2.95 (m, 1H), 2.85 (s, 3H), 2.53 (dd,  $J$  = 16.6, 8.8 Hz, 1H), 2.33 (dd,  $J$  = 16.6, 8.8 Hz, 1H), 1.85 – 1.67 (m, 6H), 1.21 (tt,  $J$  = 25.9, 12.7, 3.8 Hz, 5H).  $^{13}\text{C}$  NMR (126 MHz,  $\text{CDCl}_3$ )  $\delta$  174.3, 155.6, 107.7, 55.2, 43.8, 37.4, 36.6, 33.2, 33.1, 29.7, 26.9, 26.9, 26.4. IR ( $\text{cm}^{-1}$ ): 2925, 2852, 1697, 1499, 1448, 1400, 1268. HRMS: Calculated for  $\text{C}_{13}\text{H}_{22}\text{NO}$   $[\text{M}+\text{H}]^+$ : 208.1696. Found  $[\text{M}+\text{H}]^+$ : 208.1683. HPLC: IB, 1% isopropanol in hexanes, 30 minute method.

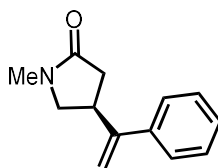

2

**1-methyl-4-(1-phenylvinyl)pyrrolidin-2-one (2):** 92% yield (3.1 mg, 10  $\mu$ mol scale; yield measured by HPLC analysis vs. TMB). >99:1 e.r.

This reaction was also performed on isolation scale with 75mg (0.24 mmol) of starting material **1** according to the following procedure, adapted from previous work in our group<sup>2</sup>: Inside of an oxygen-free glove box and using deoxygenated buffer and solvents, a stock solution containing the following solids was prepared in 2 mL 100 mM TEOA buffer (pH = 8): 12.4 mg of KRED, 6 mg NADP<sup>+</sup> and 144 mg of glucose. 1.75 mL of this turnover system stock solution was then added to a 50 mL round-bottomed flask equipped with a large cross stir bar (3 mol% NADP<sup>+</sup>, 14.5 wt% KRED, 2.9 eq glucose). Next, eighteen 100 nanomole aliquots of GluER-G6 (0.75 mol %) were added and the mixture was diluted to a total volume of 5.5 mL with 100 mM TEOA buffer (pH = 8). 75 mg (0.24 micromole) of **1** was dissolved in a total of 200 microliters of isopropanol in a 1 mL vessel, and added to the reaction mixture. The flask was sealed with a septum, parafilm and electrical tape and then removed from the glove box to a 3 °C cold room and stirred on an aluminum-foil wrapped stir plate under cyan light irradiation (2 lamps) with fan cooling. After 96 hours, the reaction mixture was removed from irradiation and quenched with 30 mL EtOAc and solid NaCl (until supersaturation). 5 mL of 15 wt % KOH was added and the mixture was stirred for 30 minutes, at which time the mixture was transferred into four 20 mL scintillation vials and extracted 6 times with EtOAc. Emulsions were resolved by centrifugation. The organic phases were combined and the combined aqueous phases were further extracted with three portions of DCM, which was added to the EtOAc extract and dried over Na<sub>2</sub>SO<sub>4</sub>, concentrated and purified by flash column chromatography (biotage, 25 g cartridge) eluting with hexanes/EtOAc to afford 22 mg (46% yield) of **2**.

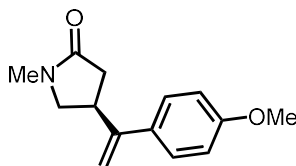

4

**4-(1-(4-methoxyphenyl)vinyl)-1-methylpyrrolidin-2-one (4):** 82% yield (Average of two reactions performed according to general procedure for biocatalytic cyclization using 6.8 mg of **4S**). >99:1 e.r.

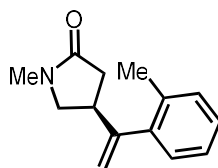

**5**

**1-methyl-4-(1-(o-tolyl)vinyl)pyrrolidin-2-one (5):** 87% yield (Average of two reactions performed according to general procedure for biocatalytic cyclization using 6.5 mg of **5S**). 97:3 e.r.

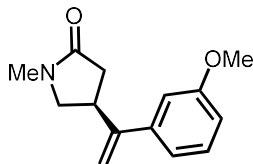

**6**

**4-(1-(3-methoxyphenyl)vinyl)-1-methylpyrrolidin-2-one (6):** 63% yield (Average of two reactions performed according to general procedure for biocatalytic cyclization using 6.8 mg of **6S**). >99:1 e.r.

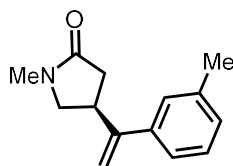

**7**

**1-methyl-4-(1-(m-tolyl)vinyl)pyrrolidin-2-one (7):** 51% yield (Average of two reactions performed according to general procedure for biocatalytic cyclization using 6.5 mg of **7S**). 99:1 e.r.

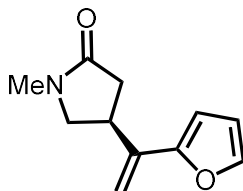

**15**

**4-(1-(furan-2-yl)vinyl)-1-methylpyrrolidin-2-one (15):** 38% yield (Average of two reactions performed according to general procedure for biocatalytic cyclization using 6.5 mg of **S15**). 99:1 e.r.

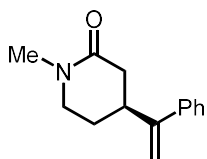

10

**(S)-1-methyl-4-(1-phenylvinyl)piperidin-2-one (10):** 53% yield (Average of two reactions performed according to general procedure for biocatalytic cyclization using 6.5 mg of **10S**). 65:35 e.r. An authentic sample was isolated by silica gel column chromatography.  $^1\text{H}$  NMR (500 MHz,  $\text{CDCl}_3$ )  $\delta$  7.33 (d,  $J = 6.7$  Hz, 5H), 5.27 (s, 1H), 5.04 (s, 1H), 3.34 – 3.26 (m, 2H), 3.13 – 2.99 (m, 1H), 2.95 (s, 3H), 2.64 (dd,  $J = 17.5, 4.8$  Hz, 1H), 2.32 (dd,  $J = 17.3, 10.2$  Hz, 1H), 2.03 (dd,  $J = 11.7, 6.8$  Hz, 1H), 1.69 (dt,  $J = 13.6, 4.6$  Hz, 1H).  $^{13}\text{C}$  NMR (126 MHz,  $\text{CDCl}_3$ )  $\delta$  169.5, 150.9, 141.3, 128.6 (2), 127.8, 126.7 (2), 112.2, 48.9, 37.7, 37.1, 34.5, 28.1. IR ( $\text{cm}^{-1}$ ): 2925, 2855, 1643, 1504, 1338, 1251, 902. HRMS: Calculated for  $\text{C}_{14}\text{H}_{18}\text{NO}$   $[\text{M}+\text{H}]^+$ : 216.1383. Found  $[\text{M}+\text{H}]^+$ : 216.1020. HPLC: AS-H, 20% isopropanol in hexanes, 60 minute method.

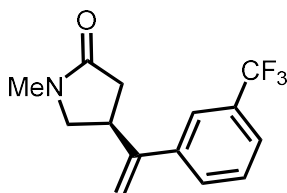

17

**1-methyl-4-(1-(3-(trifluoromethyl)phenyl)vinyl)pyrrolidin-2-one (15):** 3% yield (Average of two reactions performed according to general procedure for biocatalytic cyclization using 7.5 mg of **15S**. e.r not determined.

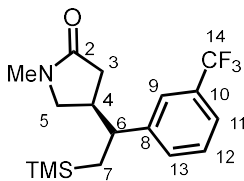

18

**1-methyl-4-(1-(3-(trifluoromethyl)phenyl)-2-(trimethylsilyl)ethyl)pyrrolidin-2-one (18):** 53% yield (Average of two reactions performed according to general procedure for biocatalytic cyclization using 7.5 mg of **15**). e.r. not determined. An analytical sample was obtained by pr  $^1\text{H}$  NMR (599 MHz,  $\text{CDCl}_3$ )  $\delta$  7.49 (d,  $J = 8.0$  Hz, 1H), 7.44 – 7.40 (m, 1H), 7.39 (s, 1H), 7.34 (d,  $J = 7.6$  Hz, 1H), 3.56 (dd,  $J = 9.7, 8.2$  Hz, 1H), 3.17 (dd,  $J = 9.5, 7.9$  Hz, 1H), 2.82 (s, 3H), 2.68 – 2.60 (m, 1H), 2.56 (app. p,  $J = 8.4$  Hz, 1H), 2.03 (dd,  $J = 17.0, 9.0$  Hz, 1H), 1.95 (dd,  $J = 17.2, 9.0$  Hz, 1H), 1.00 – 0.93 (m, 2H), -0.26 (s, 9H).  $^{13}\text{C}$  NMR signals were not detectable on the small sample isolated and most of the peaks could be extracted from NOESY and HMBC analysis. See "1H and 13C NMR Spectra of Substrates and Products" for additional details.

| Atom # | $\delta^{13}\text{C}$ (ppm) <sup>a</sup> | $\delta^1\text{H}$ (ppm) | Multiplicity | NOESY | HMBC |
|--------|------------------------------------------|--------------------------|--------------|-------|------|
| 2      | 173.93                                   |                          |              |       |      |

|      |                  |              |                                                  |                                          |          |
|------|------------------|--------------|--------------------------------------------------|------------------------------------------|----------|
| 3    | 36.17            | 1.95<br>2.03 | dd, $J = 17.2, 9.0$ Hz<br>dd, $J = 17.0, 9.0$ Hz | H-4                                      |          |
| 4    | 40.81            | 2.55         | app. p, $J = 8.4$ Hz                             | H-3'', H-5''                             |          |
| 5    | 54.09            | 3.17<br>3.56 | dd, $J = 9.5, 7.9$ Hz<br>dd, $J = 9.7, 8.2$ Hz   | H-5'', H-7, N-Me<br>H-4, H-5', H-7, N-Me |          |
| 6    | 46.62            | 2.60-2.68    | m                                                | H-7, H-13, TMS                           |          |
| 7    | 21.67            | 0.93-1.00    | m                                                | H-5', H-5'', H-6, TMS                    |          |
| 8    | n/d <sup>b</sup> |              |                                                  |                                          |          |
| 9    | 124.34           | 7.39         | s                                                |                                          |          |
| 10   | n/d <sup>b</sup> |              |                                                  |                                          |          |
| 11   | 123.70           | 7.49         | d, $J = 8.0$ Hz                                  |                                          |          |
| 12   | 129.16           | 7.43         | t, $J = 8.0$ Hz <sup>c</sup>                     |                                          |          |
| 13   | 131.22           | 7.33         | d, $J = 8.0$ Hz                                  | H-6                                      |          |
| TMS  | -1.23            | -0.26        | s                                                | H-6, H-7                                 | C-7, TMS |
| N-Me | 29.53            | 2.82         | S                                                | H-5', H-5''                              | C-2, C-5 |

<sup>a</sup> <sup>13</sup>C chemical shifts were determined from 2D HSQC and HMBC experiments

<sup>b</sup> Not detected

<sup>c</sup> Multiplicity determined from HSQC crosspeak

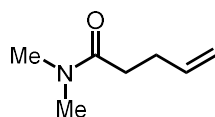

**23**

**N,N-dimethylpent-4-enamide (23):** 61% yield (10  $\mu$ mol scale; yield measured by HPLC analysis vs. TMB). When using allyl phenyl sulfone instead of trimethylallylsulfone: 74% yield. Spectral data matches the literature<sup>12</sup>. <sup>1</sup>H NMR (400 MHz, CDCl<sub>3</sub>)  $\delta$  5.97 – 5.77 (m, 1H), 5.13 – 4.90 (m, 2H), 3.00 (s, 3H), 2.94 (s, 3H), 2.39 (d,  $J = 3.0$  Hz, 4H).

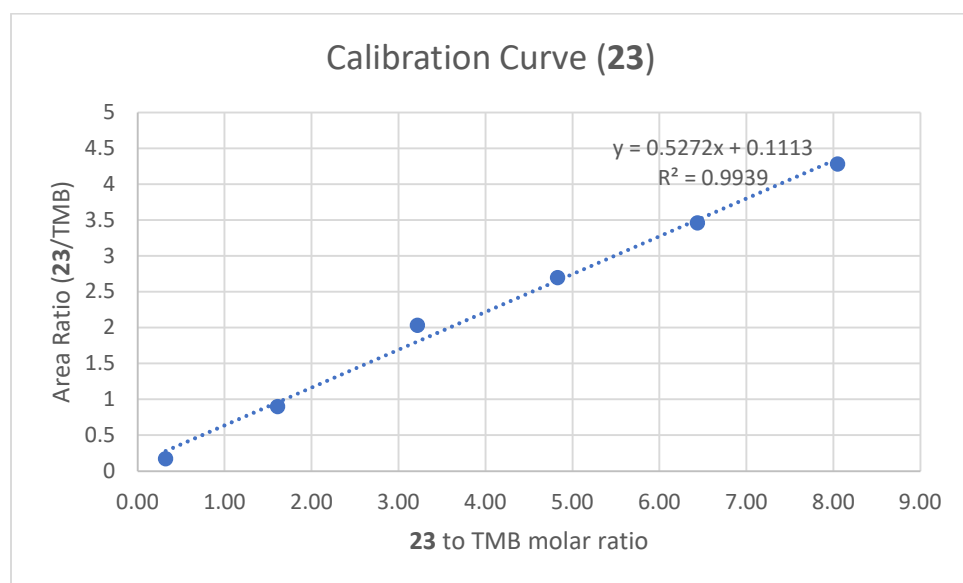

**Figure SI-10:** Calibration curve for product **23**.

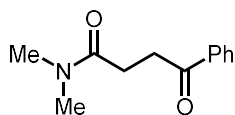

**24**

**N,N-dimethyl-4-oxo-4-phenylbutanamide (24):** 99% yield (Average of two reactions performed according to general procedure for biocatalytic cyclization 10 mmol, yield measured by HPLC vs. TMB). Spectral data matches the literature<sup>13</sup>.

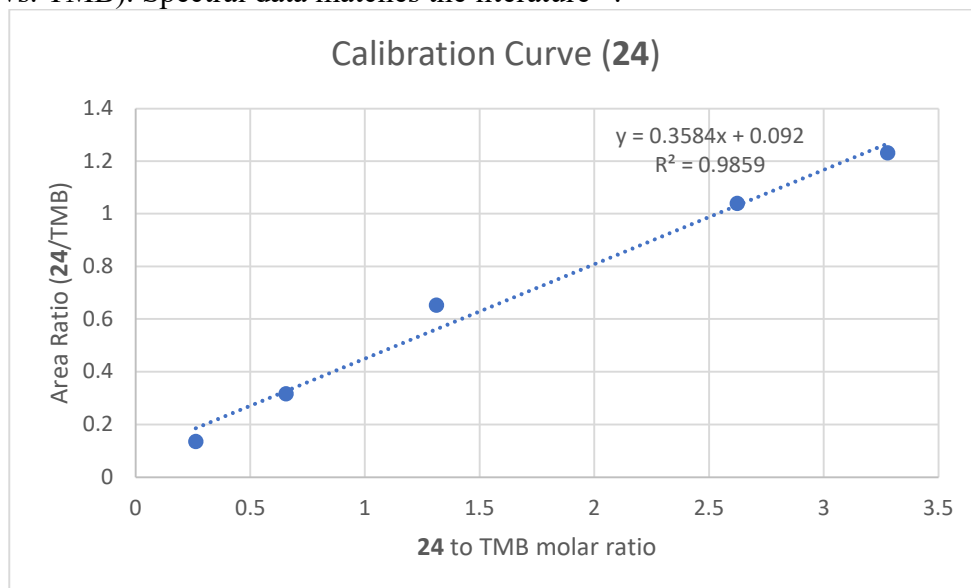

**Figure SI-11:** Calibration curve for product **24**.

## Preparation of Racemic Product Standards

### Synthesis of Unsubstituted and Alkyl-Substituted Racemic Standards

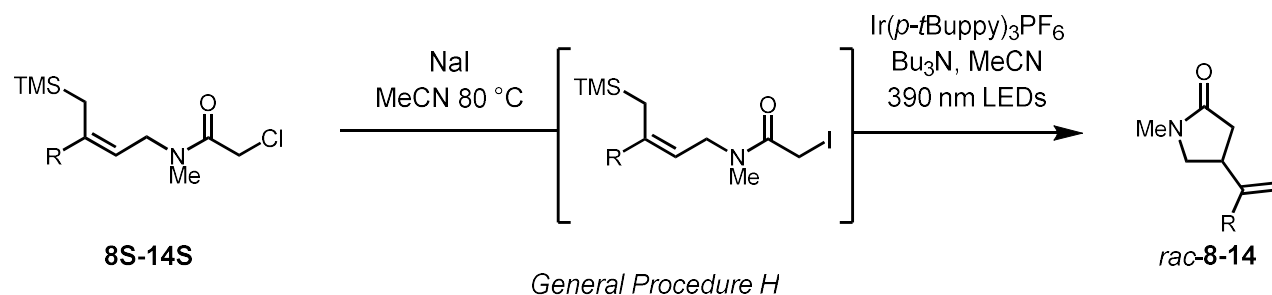

**General Procedure H:**  $\alpha$ -chloroamide substrates (1 equiv.) was dissolved in MeCN (0.1 M) and sodium iodide (3 equiv.) was added. The reaction mixture was heated at 80 °C overnight. After cooling to room temperature the mixture was filtered through a pad of Celite and concentrated. The crude material was taken up in DCM and additional insoluble salts were removed by again filtering through Celite. The mixture was concentrated and the resulting yellow/brown oil in a 20 mL scintillation vial was imported into a Coy anaerobic chamber along with  $\text{Ir}(p\text{-}t\text{Bu-ppy})_3$  (1 mol%) and both reagents were dissolved in MeCN (0.04 M) and tributylamine (2 equiv.) was added. The reaction mixture was vortexed until homogeneous and portioned into 4 mL shell vials (max 3.5 mL per vial) and capped with septa. The solutions were removed from the anaerobic chamber and irradiated with 395 nm violet light on a 96-well lumidox II LED array mounted on a tumble stirrer and cooled by a stream of air. Yields are less than 20% and not reported. The desired product is a minor component of the reaction mixture and an analytical sample of sufficient purity to analyze by chiral HPLC as a racemic standard. Figure SI-12 shows the compounds prepared according to this procedure. The optimal chiral HPLC separation conditions are reported with the biocatalytic cyclization product data under “Biocatalytic Reaction”. The HPLC traces are reported in the section “Chiral HPLC Traces of Products”.

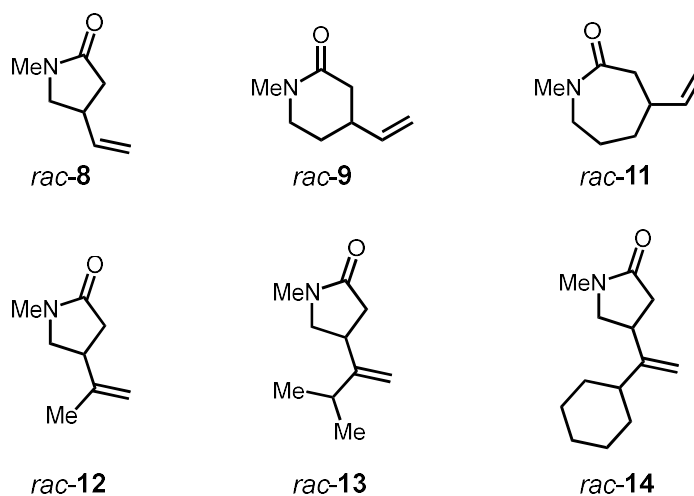

**Figure SI-12:** Racemic standards prepared by General Procedure H.

## Synthesis of Aryl-Substituted Product Standards

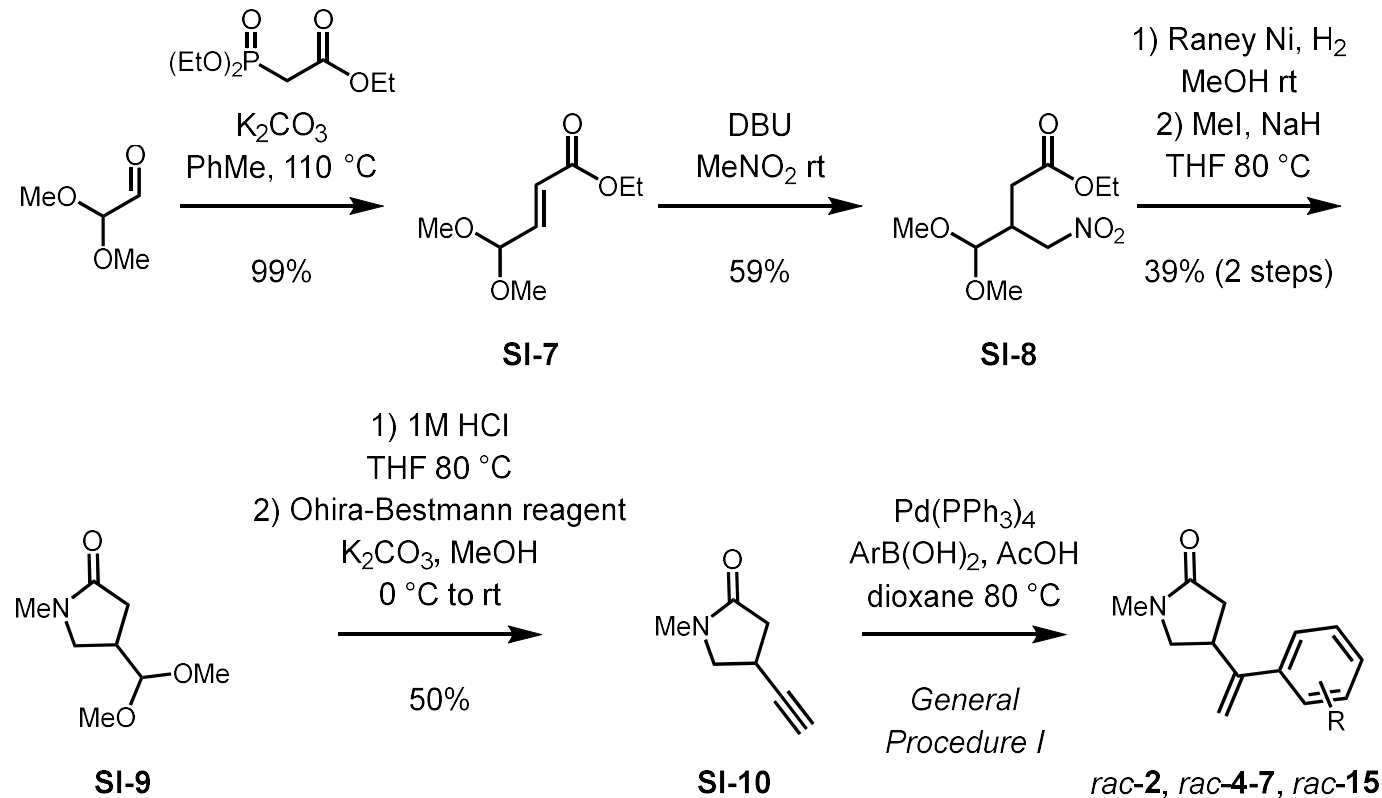

**Figure SI-13:** Synthetic approach to aryl-substituted racemic standards

**Ethyl (*E*)-4,4-dimethoxybut-2-enoate (SI-7):** Prepared according to the procedure reported by Hong and coworkers<sup>14</sup> as follows: Triethylphosphonoacetate (20 g, 89 mmol, 1 equiv.) and dimethyl glyoxal (60% solution in water, 17 g, 98 mmol, 1.1 equiv.) were dissolved in toluene (300 mL) and potassium carbonate (14.8 g, 107 mmol, 1.2 equiv.) was added before the mixture was heated to reflux for 2 hours. After cooling to room temperature, the reaction mixture was diluted with water and EtOAc and the layers were separated. The aqueous layer was washed with two additional portions of EtOAc and the combined organic layers were dried over  $\text{Na}_2\text{SO}_4$  and concentrated by rotary evaporator to afford the title compound (15.5 g, 99% yield) as a clear oil that was used without further purification or analysis.

**Ethyl 4,4-dimethoxy-3-(nitromethyl)butanoate (SI-8):** Adapted from the procedure reported by Kenda and coworkers<sup>15</sup> as follows: **SI-7** (15.5 g, 89 mmol, 1 equiv.) was dissolved in nitromethane (48 mL, 890 mmol, 10 equiv.) and DBU (14.6 mL, 98 mmol, 1.1 equiv.) was added dropwise, leading to a yellow-red solution. When the reaction was judged complete by TLC, the reaction mixture was concentrated by rotary evaporator and the crude material was purified by flash column chromatography eluting with hexanes/EtOAc to afford the title compound (17.4 g, 83% yield) as a pale yellow oil.  $^1\text{H}$  NMR (400 MHz,  $\text{CDCl}_3$ )  $\delta$  4.60 (dd,  $J = 13.3, 5.7$  Hz, 1H), 4.45 (dd,  $J = 13.2, 6.8$  Hz, 1H), 4.39 (d,  $J = 5.1$  Hz, 1H), 4.15 (q,  $J = 7.1$  Hz, 2H), 3.40 (s, 6H), 2.99 (ttd,  $J = 6.9, 5.9, 5.0$  Hz, 1H), 2.59 (dd,  $J = 16.8, 6.2$  Hz, 1H), 2.42 (dd,  $J = 16.8, 7.1$  Hz, 1H), 1.26 (t,  $J = 7.1$  Hz, 4H).

**4-(dimethoxymethyl)-1-methylpyrrolidin-2-one (SI-9):** Adapted from a protocol reported by Domingos and coworkers<sup>16</sup>: Raney nickel (3 g wet) was washed with three portions of methanol and added to a flask containing **SI-8** (5 g, 21 mmol, 1 equiv.) and methanol (70 mL) was added. The reaction mixture was evacuated under vacuum and backfilled with H<sub>2</sub>. After three additional evacuation/backfill cycles, the reaction mixture was allowed to vigorously stir under an atmosphere of H<sub>2</sub> (balloon) overnight. The reaction mixture was filtered through a pad of Celite and concentrated by rotary evaporator to afford crude 4-(dimethoxymethyl)pyrrolidin-2-one as a yellow-orange solid (2.83 g, 84% yield) that was not purified further. 1.83 g (11.5 mmol, 1 equiv.) of this material was dissolved in THF (38 mL) and cooled to 0 °C. Sodium hydride (60% dispersion in mineral oil, 690 mg, 1.5 equiv.) was added and stirred for 30 minutes before iodomethane (1.4 mL, 23 mmol) was added and the reaction mixture was heated to reflux for six hours. The reaction mixture was poured onto saturated ammonium chloride solution and diluted with EtOAc. The layers were separated and the aqueous layer was washed with four additional portions of EtOAc. The combined organic layers were dried over Na<sub>2</sub>SO<sub>4</sub> and concentrated by rotary evaporator, then purified by flash column chromatography eluting with hexanes/EtOAc to afford the title compound (911 mg, 46% yield; 39% calculated over 2 steps) as a yellow oil. <sup>1</sup>H NMR (400 MHz, CDCl<sub>3</sub>) δ 4.25 (d, *J* = 7.2 Hz, 1H), 3.43 – 3.32 (m, 7H), 3.26 (dd, *J* = 10.1, 5.8 Hz, 1H), 2.82 (d, *J* = 1.0 Hz, 3H), 2.74 – 2.60 (m, 1H), 2.46 (dd, *J* = 17.2, 9.6 Hz, 1H), 2.30 (dd, *J* = 17.2, 6.9 Hz, 1H).

**4-ethynyl-1-methylpyrrolidin-2-one (SI-10):** **SI-10** (1 g, 5.8 mmol, 1 equiv.) was dissolved in THF (19 mL) and HCl (1 M, 5.8 mmol, 5.8 mL) was added. The mixture was heated to reflux until judged complete by TLC. Upon cooling to room temperature, the reaction mixture was diluted with EtOAc and dried over Na<sub>2</sub>SO<sub>4</sub> before being concentrated by rotary evaporator to afford a crude red-orange oil. This crude material was directly taken up in MeOH (10 mL) and cooled to 0 °C before dimethyldiazomethylphosphonate (1.2 g, 5.8 mmol, 1 equiv.) was added, followed by solid K<sub>2</sub>CO<sub>3</sub> (1.2 g, 8.7 mmol, 1.5 equiv.). The reaction mixture was allowed to warm to room temperature overnight and then poured to onto saturated aqueous ammonium chloride and extracted with three portions of EtOAc. The combined organic layers were dried over Na<sub>2</sub>SO<sub>4</sub> and purified by flash column chromatography eluting with hexanes/EtOAc to afford the title compound (358 mg, 50% yield) as a clear oil. <sup>1</sup>H NMR (400 MHz, CDCl<sub>3</sub>) δ 4.25 (d, *J* = 7.2 Hz, 1H), 3.43 – 3.32 (m, 7H), 3.26 (dd, *J* = 10.1, 5.8 Hz, 1H), 2.82 (d, *J* = 1.0 Hz, 3H), 2.74 – 2.60 (m, 1H), 2.46 (dd, *J* = 17.2, 9.6 Hz, 1H), 2.30 (dd, *J* = 17.2, 6.9 Hz, 1H).

**General Procedure I:** In a procedure adapted from Schindler and coworkers<sup>17</sup>, alkyne **SI-10** (1 equiv.) was dissolved in degassed (sparged with N<sub>2</sub>, ~20 minutes) dioxane (0.3 M) and aryl boronic acid (1.2 equiv.) was added, followed by Pd(PPh<sub>3</sub>)<sub>4</sub> (3 mol%). Acetic acid (10 mol%) was added last and the reaction mixture was heated to 80 °C overnight. After cooling to room temperature, the reaction mixture was filtered through a plug of silica gel eluting with EtOAc. The solvent was removed by rotary evaporator and an analytical sample of the product was isolated by preparative HPLC to obtain characterization data and racemic HPLC traces for analysis of the biocatalytic reaction products.

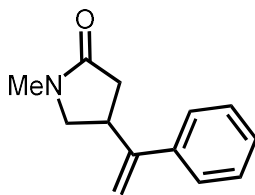

**1**

**1-methyl-4-(1-phenylvinyl)pyrrolidin-2-one (1):** Prepared according to General Procedure I using 20 mg (.16 mmol) of **SI-10** to afford 12 mg (37% yield) of **1**. **<sup>1</sup>H NMR** (500 MHz, CDCl<sub>3</sub>) δ 7.40 – 7.27 (m, 5H), 5.32 (s, 1H), 5.12 (d, *J* = 1.3 Hz, 1H), 3.61 – 3.50 (m, 2H), 3.25 – 3.16 (m, 1H), 2.83 (s, 3H), 2.65 (dd, *J* = 16.6, 8.3 Hz, 1H), 2.52 – 2.44 (m, 1H). **<sup>13</sup>C NMR** (126 MHz, CDCl<sub>3</sub>) δ 173.9, 149.1, 141.0, 128.7, 128.0, 126.6, 112.5, 54.7, 36.7, 36.2, 29.7. **IR** (cm<sup>-1</sup>): 2954, 1691, 1497, 1435, 1401, 1300, 1259, 992, 910. **HRMS**: Calculated for C<sub>13</sub>H<sub>16</sub>NO [M+H]<sup>+</sup>: 202.1226. Found [M+H]<sup>+</sup>: 202.1236. **HPLC**: IB, 2% isopropanol in hexanes, 60 minute method.

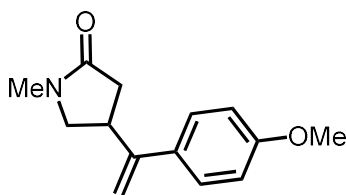

**4**

**4-(1-(4-methoxyphenyl)vinyl)-1-methylpyrrolidin-2-one (4):** Prepared according to General Procedure I using 30 mg (0.24 mmol) of **SI-10** to afford 8 mg (17% yield) of **4**. **<sup>1</sup>H NMR** (400 MHz, CDCl<sub>3</sub>) δ 7.31 – 7.26 (m, 2H), 6.95 – 6.77 (m, 2H), 5.26 (s, 1H), 5.04 (d, *J* = 1.3 Hz, 1H), 3.82 (s, 3H), 3.62 – 3.44 (m, 2H), 3.29 – 3.13 (m, 1H), 2.84 (s, 3H), 2.65 (dd, *J* = 16.6, 8.0 Hz, 1H), 2.55 – 2.38 (m, 1H). **<sup>13</sup>C NMR** (126 MHz, CDCl<sub>3</sub>) δ 174.0, 159.5, 148.4, 133.3, 127.6, 114.0, 111.0, 55.4, 54.8, 36.7, 36.2, 29.7. **IR** (cm<sup>-1</sup>): 2936, 1689, 1625, 1511, 1296, 1247, 1182, 1036, 913. **HRMS**: Calculated for C<sub>14</sub>H<sub>18</sub>NO<sub>2</sub> [M+H]<sup>+</sup>: 232.1332. Found [M+H]<sup>+</sup>: 232.1329. **HPLC**: IC, 20% isopropanol in hexanes, 55 minute method.

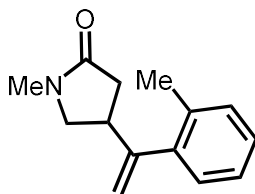

**5**

**1-methyl-4-(1-(o-tolyl)vinyl)pyrrolidin-2-one (5):** Prepared according to General Procedure I using 30 mg (0.24 mmol) of **SI-10** to afford 7.2 mg (14% yield) of **5**. **<sup>1</sup>H NMR** (400 MHz, CDCl<sub>3</sub>) δ 7.23 – 7.11 (m, 3H), 7.08 – 6.98 (m, 1H), 5.28 (t, *J* = 1.2 Hz, 1H), 5.02 (t, *J* = 1.0 Hz, 1H), 3.46 – 3.28 (m, 2H), 3.23 (dd, *J* = 8.3, 6.9 Hz, 1H), 2.81 (s, 3H), 2.62 – 2.40 (m, 2H), 2.27 (s, 3H). **<sup>13</sup>C NMR** (126 MHz, CDCl<sub>3</sub>) δ 174.0, 149.1, 141.3, 135.0, 130.5, 128.6, 127.5, 125.8,

114.5, 54.0, 38.6, 36.3, 29.7, 20.0. **IR** ( $\text{cm}^{-1}$ ): 2923, 2859, 1693, 1498, 1428, 1401, 1256, 913. **HRMS**: Calculated for  $\text{C}_{14}\text{H}_{18}\text{NO}$   $[\text{M}+\text{H}]^+$ : 216.1383. Found  $[\text{M}+\text{H}]^+$ : 216.1376. **HPLC**: OJ-H, 5% isopropanol in hexanes, 50 minute method.

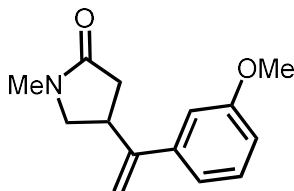

6

**4-(1-(3-methoxyphenyl)vinyl)-1-methylpyrrolidin-2-one (6)**: Prepared according to General Procedure I using 30 mg (0.24 mmol) of **SI-10** to afford 2 mg (4% yield) of **6**.  **$^1\text{H}$  NMR** (500 MHz,  $\text{CDCl}_3$ )  $\delta$  6.94 – 6.89 (m, 1H), 6.88 – 6.81 (m, 2H), 5.33 (d,  $J = 1.9$  Hz, 1H), 5.11 (d,  $J = 2.0$  Hz, 1H), 3.89 – 3.76 (m, 3H), 3.60 – 3.47 (m, 2H), 3.20 (q,  $J = 2.8$  Hz, 1H), 2.83 (d,  $J = 2.0$  Hz, 3H), 2.65 (dd,  $J = 17.0, 7.8$  Hz, 1H), 2.47 (dd,  $J = 16.6, 7.3$  Hz, 1H).  **$^{13}\text{C}$  NMR** (126 MHz,  $\text{CDCl}_3$ )  $\delta$  173.9, 159.8, 149.0, 142.5, 129.6, 119.0, 113.0, 112.7, 112.6, 55.4, 54.7, 36.6, 36.3, 29.7. **IR** ( $\text{cm}^{-1}$ ): 2999, 2362, 1609, 1576, 1488, 1289, 1225, 1046, 910. **HRMS**: Calculated for  $\text{C}_{14}\text{H}_{18}\text{NO}_2$   $[\text{M}+\text{H}]^+$ : 232.1332. Found  $[\text{M}+\text{H}]^+$ : 232.1321. **HPLC**: AS-H, 20% isopropanol in hexanes, 60 minute method.

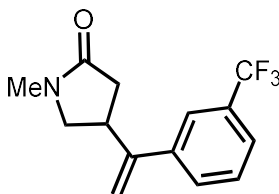

17

**1-methyl-4-(1-(3-(trifluoromethyl)phenyl)vinyl)pyrrolidin-2-one (16)**: Prepared according to General Procedure I using 30 mg (0.24 mmol) of **SI-10** to afford 3 mg (5% yield) of **15**.  **$^1\text{H}$  NMR** (500 MHz,  $\text{CDCl}_3$ )  $\delta$  7.57 (dd,  $J = 4.3, 2.2$  Hz, 2H), 7.54 – 7.46 (m, 2H), 5.39 (s, 1H), 5.22 (d,  $J = 1.5$  Hz, 1H), 3.61 – 3.51 (m, 2H), 3.27 – 3.18 (m, 1H), 2.85 (s, 3H), 2.71 – 2.63 (m, 1H), 2.46 (dd,  $J = 16.6, 7.7$  Hz, 1H).  **$^{13}\text{C}$  NMR** (126 MHz,  $\text{CDCl}_3$ )  $\delta$  173.5, 148.1, 141.8, 131.2(q), 129.8, 129.2, 124.7(q), 124.1(q,  $\text{CF}_3$ ) 123.3 (q), 114.0, 54.5, 36.6, 36.1, 29.7.  **$^{19}\text{F}$  NMR** (470 MHz,  $\text{CDCl}_3$ )  $\delta$  -62.7. **IR** ( $\text{cm}^{-1}$ ): 2927, 1692, 1500, 1434, 1402, 1330, 1165, 1123, 903. **HRMS**: Calculated for  $\text{C}_{14}\text{H}_{15}\text{F}_3\text{NO}$   $[\text{M}+\text{H}]^+$ : 270.1100. Found  $[\text{M}+\text{H}]^+$ : 270.1104.

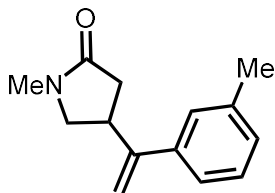

7

**1-methyl-4-(1-(m-tolyl)vinyl)pyrrolidin-2-one (7):** Prepared according to General Procedure I using 30 mg (0.24 mmol) of **SI-10** to afford 4 mg (8% yield) of **7**. **<sup>1</sup>H NMR** (400 MHz, CDCl<sub>3</sub>) δ 7.23 (d, *J* = 7.2 Hz, 1H), 7.12 (d, *J* = 8.4 Hz, 3H), 5.30 (s, 1H), 5.10 (d, *J* = 1.2 Hz, 1H), 3.62 – 3.48 (m, 2H), 3.21 (dd, *J* = 10.0, 3.5 Hz, 1H), 2.84 (s, 3H), 2.65 (dd, *J* = 16.6, 7.8 Hz, 1H), 2.47 (dd, *J* = 16.5, 7.7 Hz, 1H), 2.37 (s, 3H). **<sup>13</sup>C NMR** (126 MHz, CDCl<sub>3</sub>) δ 173.9, 149.3, 141.0, 138.3, 128.7, 128.5, 127.4, 123.6, 112.2, 54.8, 36.7, 36.3, 29.7, 21.6. **IR** (cm<sup>-1</sup>): 2925, 2857, 1698, 1457, 1400, 1266. **HRMS**: Calculated for C<sub>14</sub>H<sub>18</sub>NO [M+H]<sup>+</sup>: 216.1383. Found [M+H]<sup>+</sup>: 216.1380. **HPLC**: AS-H, 20% isopropanol in hexanes, 45 minute method.

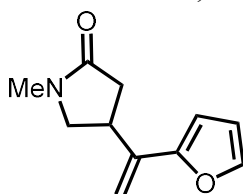

## 15

**4-(1-(furan-2-yl)vinyl)-1-methylpyrrolidin-2-one (15):** Prepared according to General Procedure I using 45 mg (0.36 mmol) of **SI-10** to afford 8 mg (12% yield) of **15**. **<sup>1</sup>H NMR** (400 MHz, CDCl<sub>3</sub>) δ 7.39 (s, 1H), 6.42 (d, *J* = 1.8 Hz, 1H), 6.34 (d, *J* = 3.3 Hz, 1H), 5.62 (s, 1H), 5.06 (s, 1H), 3.71 – 3.62 (m, 1H), 3.46 – 3.29 (m, 2H), 2.87 (d, *J* = 5.0 Hz, 3H), 2.68 (dd, *J* = 17.0, 9.0 Hz, 1H), 2.53 (q, *J* = 7.5 Hz, 1H). **<sup>13</sup>C NMR** (126 MHz, CDCl<sub>3</sub>) δ 173.8, 153.5, 142.4, 138.2, 111.3, 109.1, 106.6, 54.7, 36.5, 34.2, 29.7. **IR** (cm<sup>-1</sup>): 2941, 1604, 1505, 1434, 1403, 1301, 1264, 1163, 1018, 913. **HRMS**: Calculated for C<sub>11</sub>H<sub>14</sub>NO<sub>2</sub> [M+H]<sup>+</sup>: 192.1025. Found [M+H]<sup>+</sup>: 192.1376. **HPLC**: OJ-H, 5% isopropanol in hexanes, 50 minute method.

## REFERENCE LIST

- 1) Biegasiewicz, K. F.; Cooper, S. J.; Gao, X.; Oblinsky, D. G.; Kim, J. H.; Garfinkle, S. E.; Joyce, L. A.; Sandoval, B. A.; Scholes, G. D.; Hyster, T. K. *Science* **2019**, *364*, 1166–1169.
- 2) Nicholls, B. T.; Oblinsky, D. G.; Kurtoic, S. I.; Grosheva, D.; Ye, Y.; Scholes, G. D.; Hyster, T. K. *Angewandte Chemie International Edition* **2022**, *61*, e202113842.
- 3) Michaut, A.; Boddaert, T.; Coquerel, Y.; Rodriguez, J. *Synthesis* **2007**, *2007*, 2867–2871.
- 4) Sato, T.; Wada, Y.; Nishimoto, M.; Ishibashi, H.; Ikeda, M. *J. Chem. Soc., Perkin Trans. I* **1989**, *5*, 879–886.
- 5) Zheng, H.-J.; Chen, W.-B.; Wu, Z.-J.; Deng, J.-G.; Lin, W.-Q.; Yuan, W.-C.; Zhang, X.-M. *Chemistry – A European Journal* **2008**, *14*, 9864–9867.
- 6) Zhang, C.-C.; Chen, L.-J.; Shen, B.-C.; Xie, H.-D.; Li, W.; Sun, Z.-W. *Org. Biomol. Chem.* **2021**, *19*, 8607–8612.
- 7) Takeda, T.; Harada, S.; Nishida, A. *Org. Lett.* **2015**, *17*, 5184–5187.
- 8) Zhang, G.; Wang, Y.; Xu, J.; Sun, J.; Sun, F.; Zhang, Y.; Zhang, C.; Du, Y. *Chem. Sci.* **2020**, *11*, 947–953.
- 9) Yang, P.; Xu, H.; Zhou, J. *Angew. Chem. Int. Ed.* **2014**, *53*, 12210–12213.
- 10) Li, H.; Fiorito, D.; Mazet, C. *ACS Catal.* **2017**, *7*, 1554–1562.
- 11) Chen, Z.-D.; Xu, W.-K.; Guo, J.-M.; Chen, L.; Wei, B.-G.; Si, C.-M.; Lin, G.-Q. *J. Org. Chem.* **2021**, *86*, 11442–11455.

- 
- 12) Lu, Y.-S.; Yu, W.-Y. *Org. Lett.* **2016**, *18*, 1350–1353.
- 13) Tanaka, K.; Shibata, Y.; Suda, T.; Hagiwara, Y.; Hirano, M., *Org. Lett.* **2007**, *9*, 1215-1218.
- 14) Hong, B.-C.; Chen, P.-Y.; Kotame, P.; Lu, P.-Y.; Lee, G.-H.; Liao, J.-H. *Chem. Commun.* **2012**, *48*, 7790–7792.
- 15) Kenda, B. M.; Matagne, A. C.; Talaga, P. E.; Pasau, P. M.; Differding, E.; Lallemand, B. I.; Frycia, A. M.; Moureau, F. G.; Klitgaard, H. V.; Gillard, M. R.; Fuks, B.; Michel, P. *J. Med. Chem.* **2004**, *47*, 530–549.
- 16) Domingos, J. L. O.; Lima, E. C.; Dias, A. G.; Costa, P. R. R. *Tetrahedron: Asymmetry* **2004**, *15*, 2313–2314.
- 17) Ludwig, J. R.; Watson, R. B.; Nasrallah, D. J. Gianiono, J. B.; Zimmerman, P. M.; Wiscons, R. A.; Schindler C. S. *Science*, **2018**, *361*, 1363-1369.

## Chiral HPLC Traces of Products

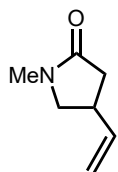

**8**

Racemic:

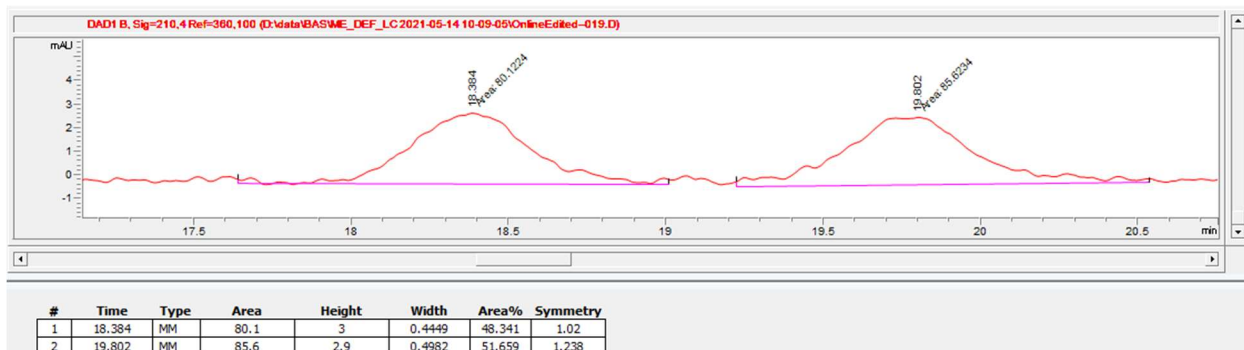

Biocatalytic Cyclization of allylsilane substrate **8S** (with GluER “G6”):

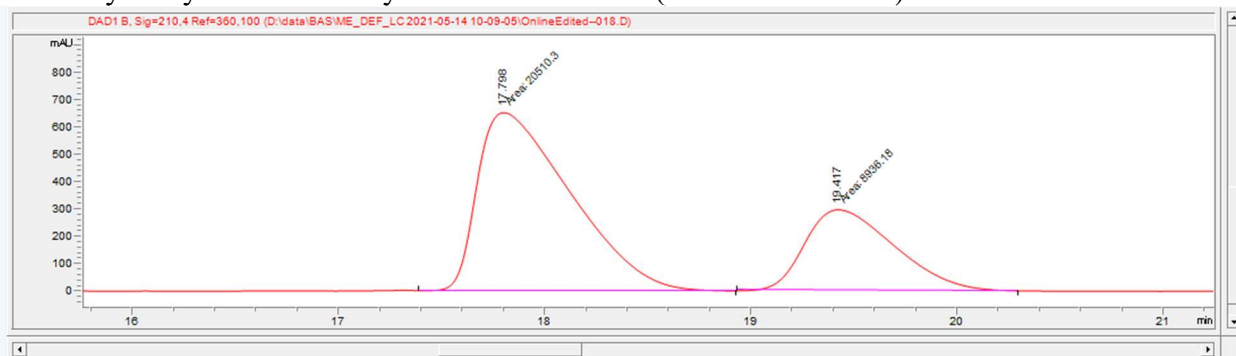

Biocatalytic Cyclization of allylsulfone substrate **8S-b** (with GluER “G6”):

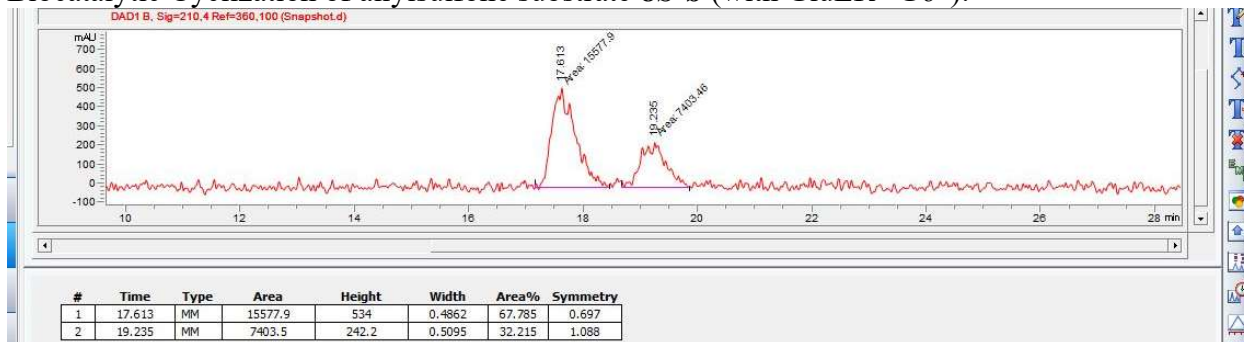

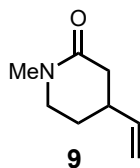

Racemic:

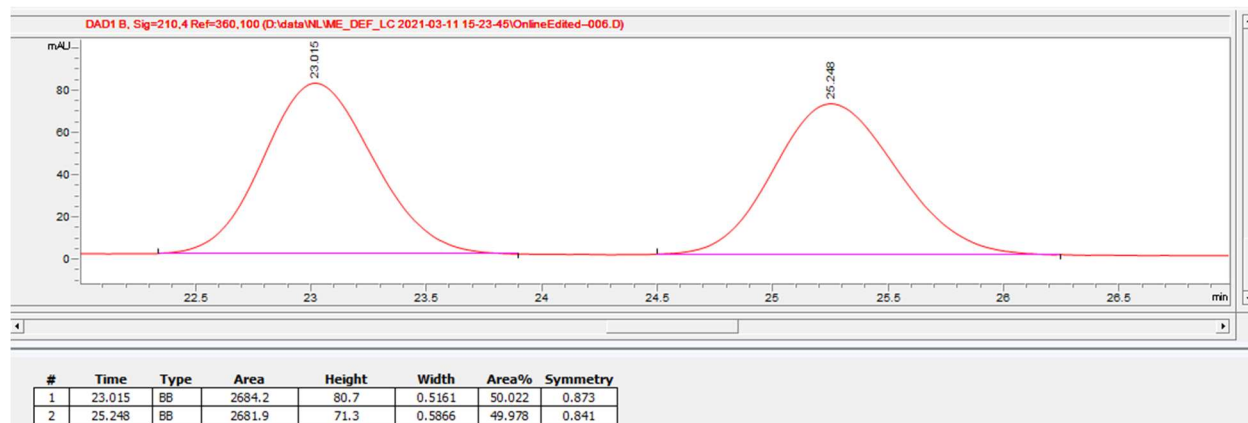

Biocatalytic Cyclization (with GluER “G6”):

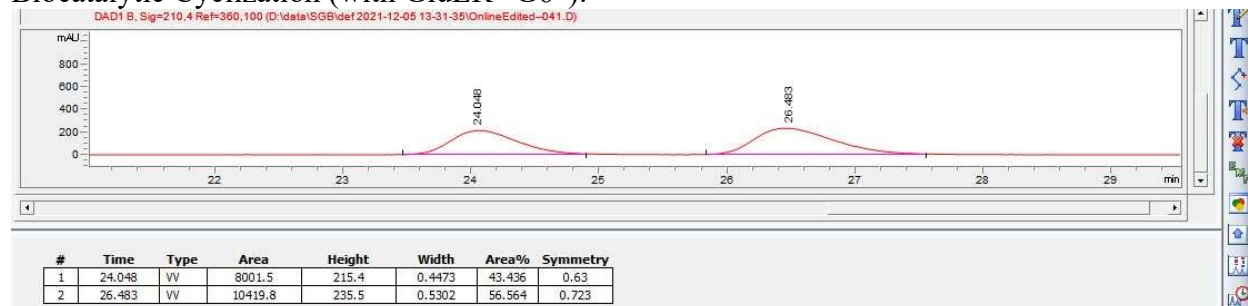

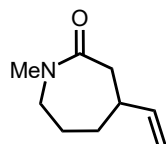

11

Racemic:

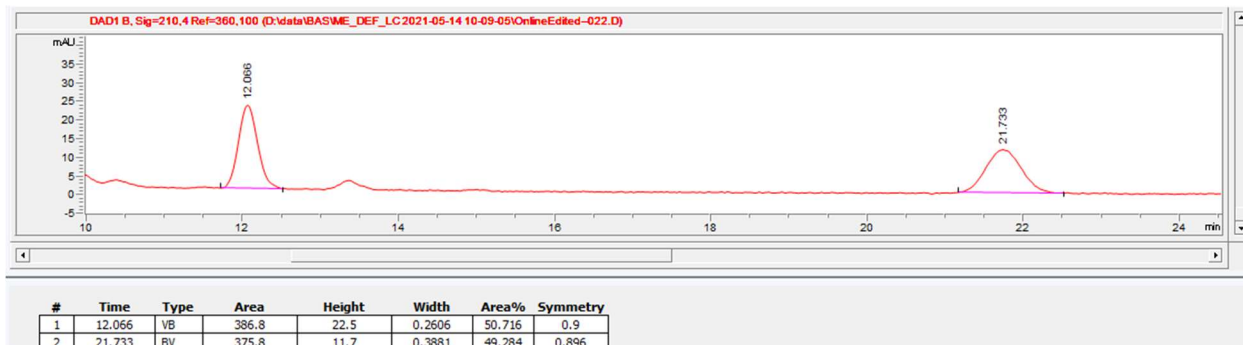

Biocatalytic Cyclization (with GluER "G6"):

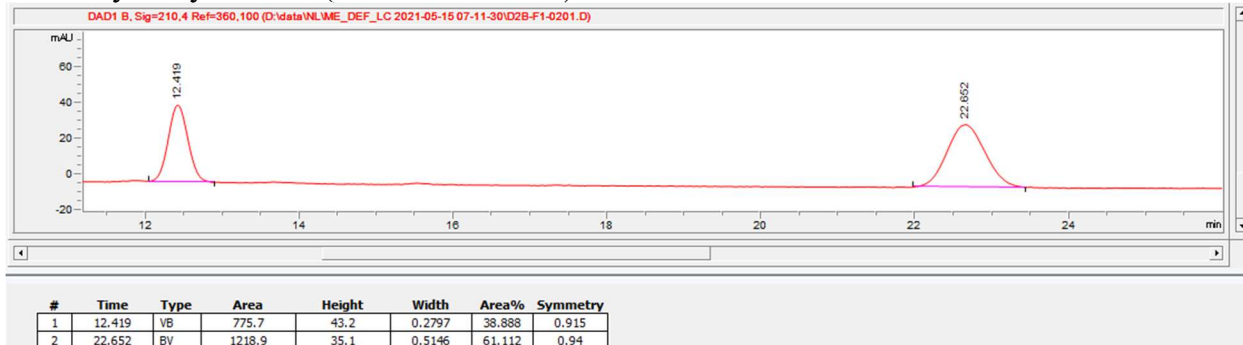

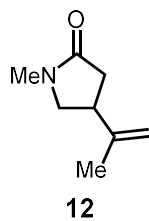

Racemic:

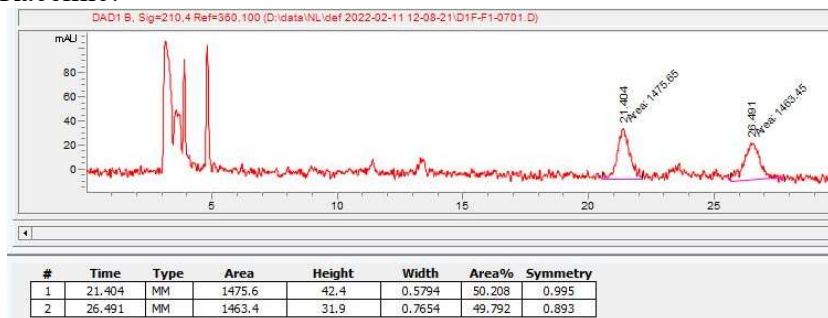

Biocatalytic Cyclization (with GluER “G6”):

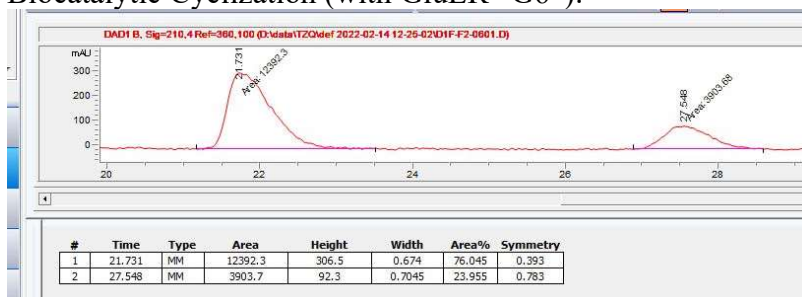

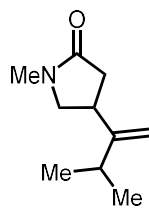

13

Racemic:

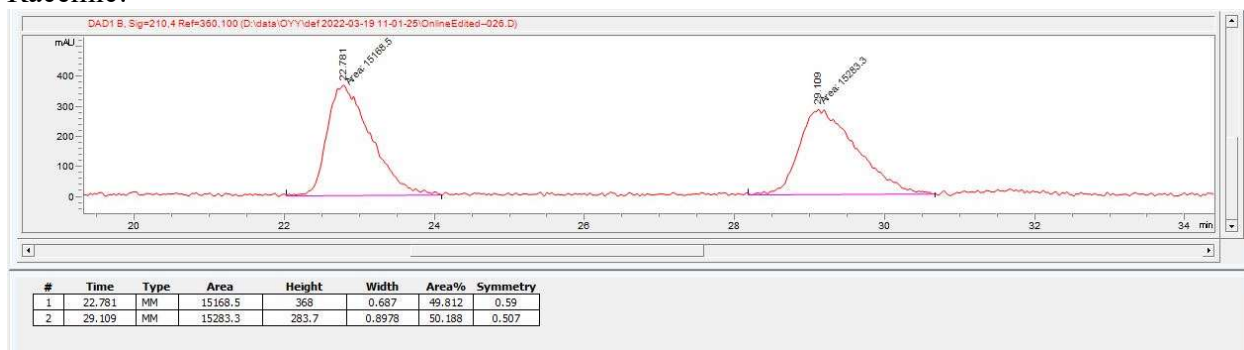

Biocatalytic Cyclization (with GluER “G6”):

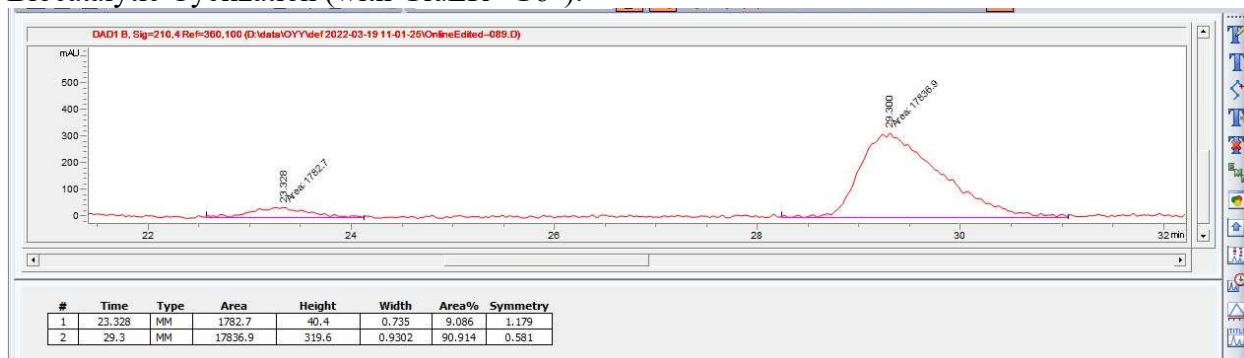

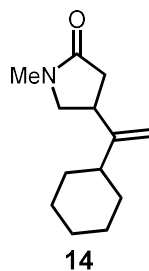

Racemic:

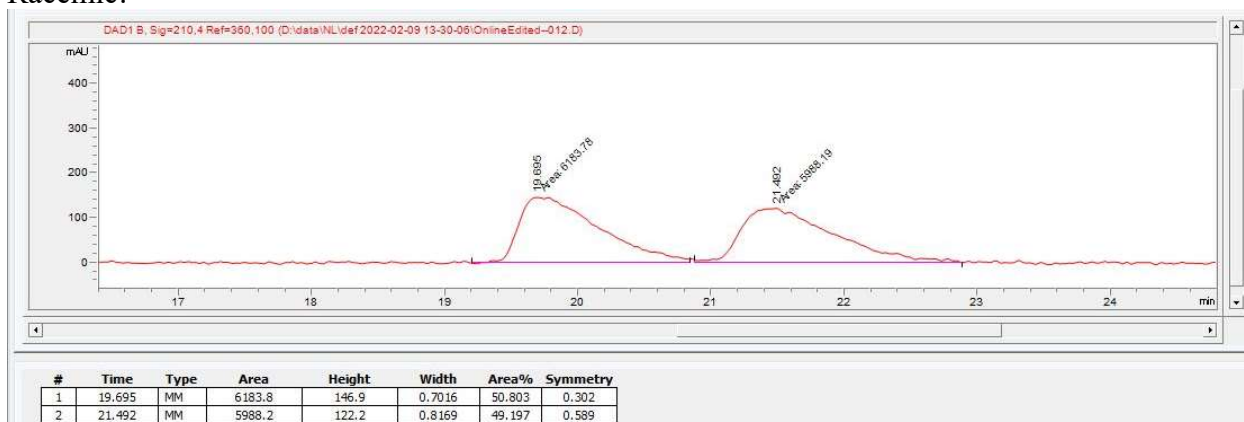

Biocatalytic Cyclization (with GluER “G6”):

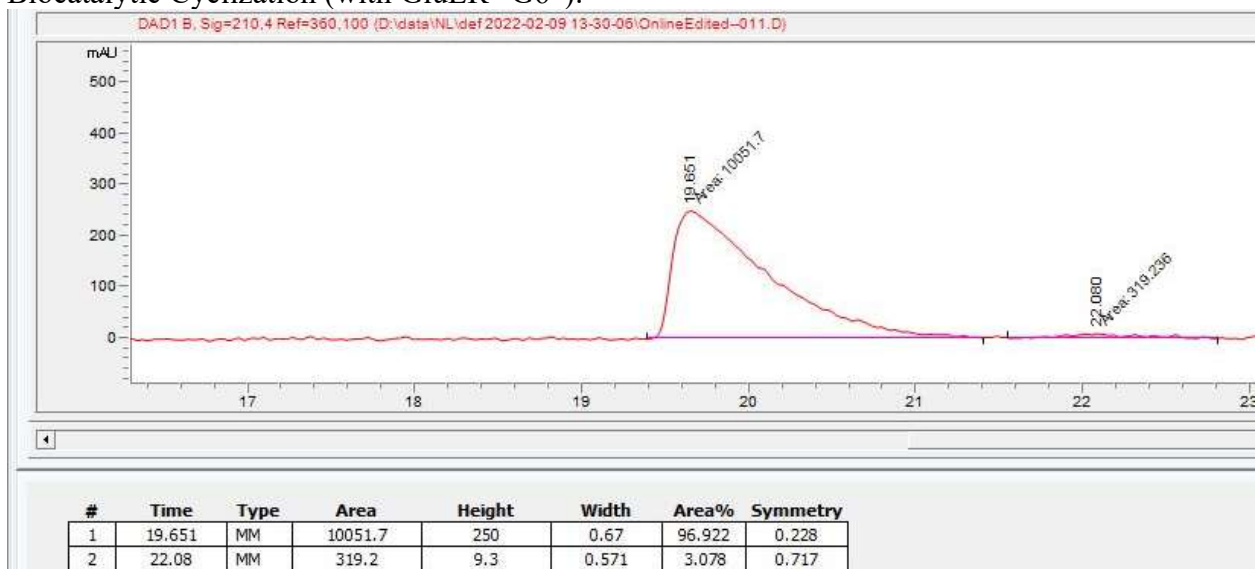

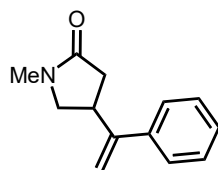

1

Racemic:

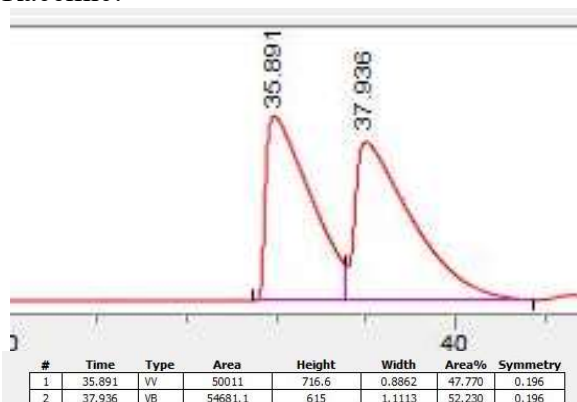

Biocatalytic Cyclization (with GluER “G6”):

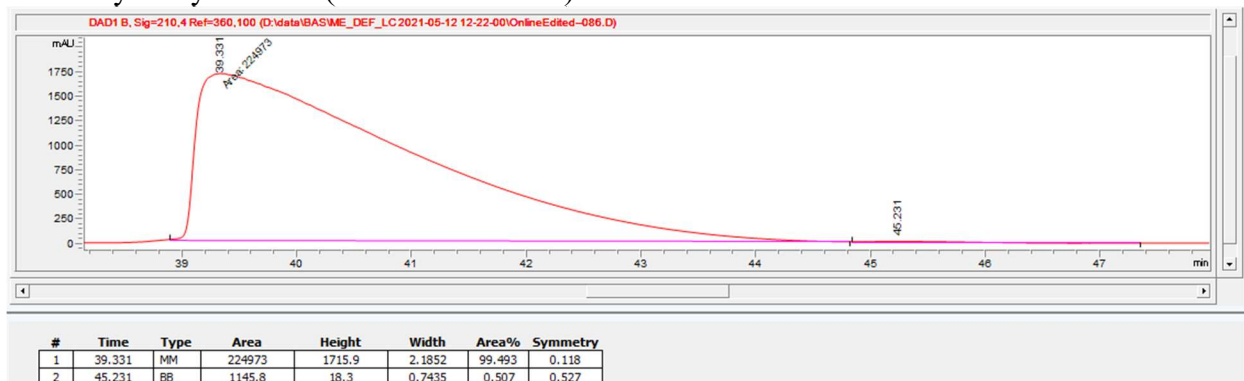

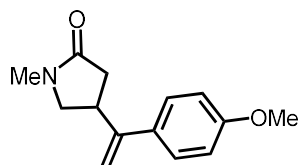

4

Racemic:

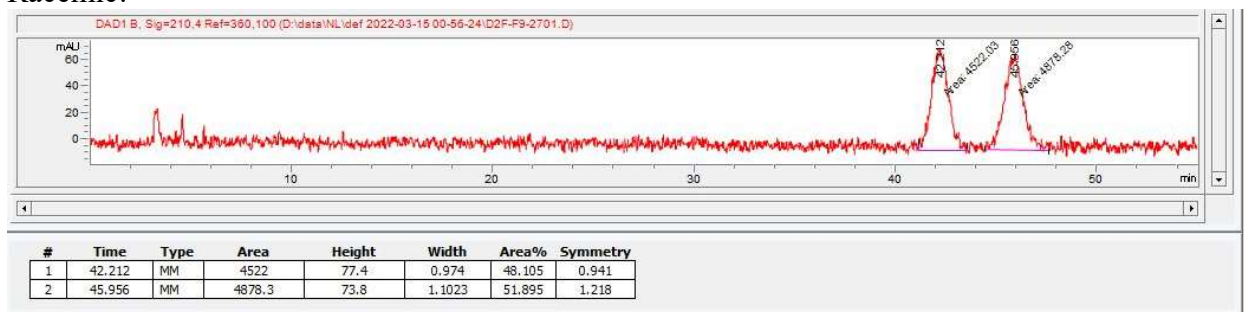

Biocatalytic Cyclization (with GluER “G6”):

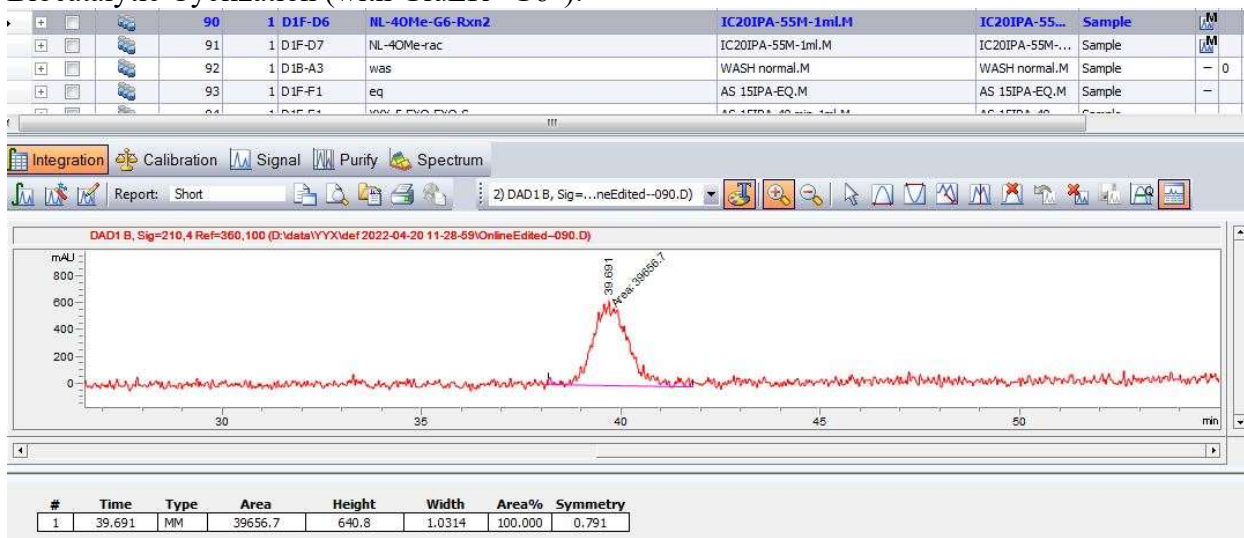

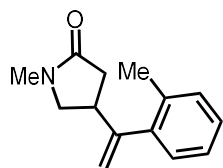

5

Racemic:

4-14 10-54-34\OnlineEdited-055.D\}

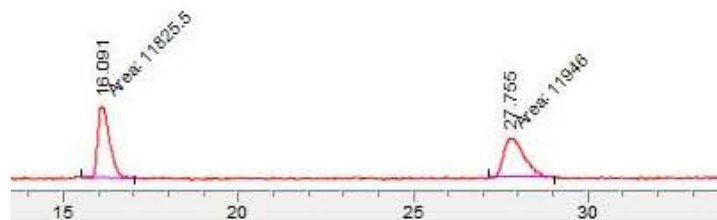

| # | Time   | Type | Area    | Height | Width  | Area%  | Symmetry |
|---|--------|------|---------|--------|--------|--------|----------|
| 1 | 16.091 | MM   | 11825.5 | 499.7  | 0.3945 | 49.747 | 0.631    |
| 2 | 27.755 | MM   | 11946   | 283.7  | 0.7019 | 50.253 | 0.449    |

Biocatalytic Cyclization (with GluER “G6”):

00 (D:\data\NL\def 2022-04-14 10-54-34\OnlineEdited-054.D)

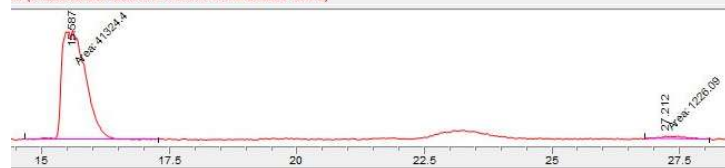

| # | Time   | Type | Area    | Height | Width  | Area%  | Symmetry |
|---|--------|------|---------|--------|--------|--------|----------|
| 1 | 15.587 | MM   | 41324.4 | 1255.2 | 0.5487 | 97.119 | 0.768    |
| 2 | 27.212 | MM   | 1226.1  | 34.2   | 0.5981 | 2.881  | 0.379    |

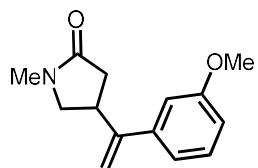

6

Racemic:

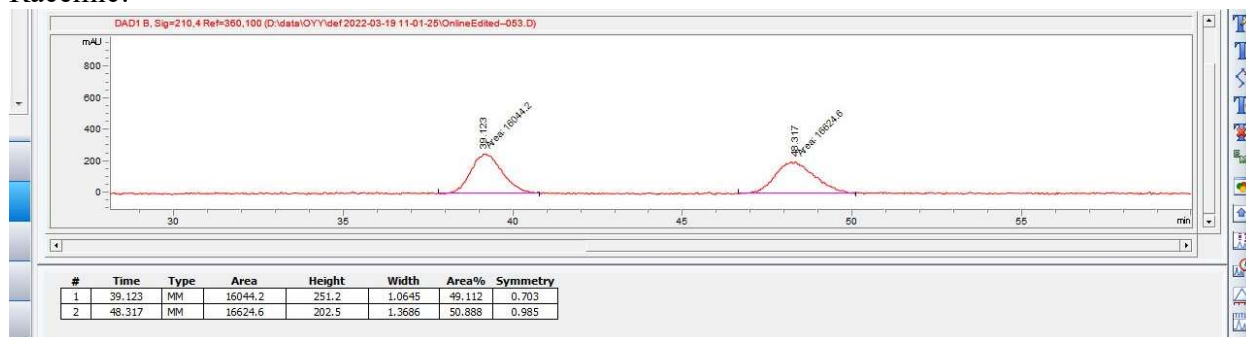

Biocatalytic Cyclization (with GluER “G6”):

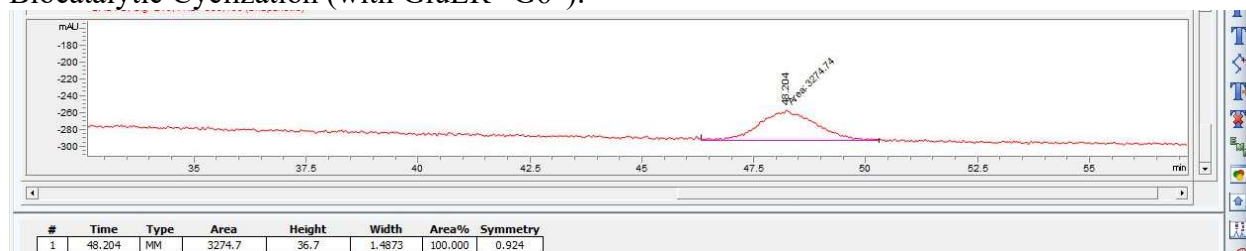

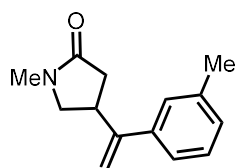

7

Racemic:

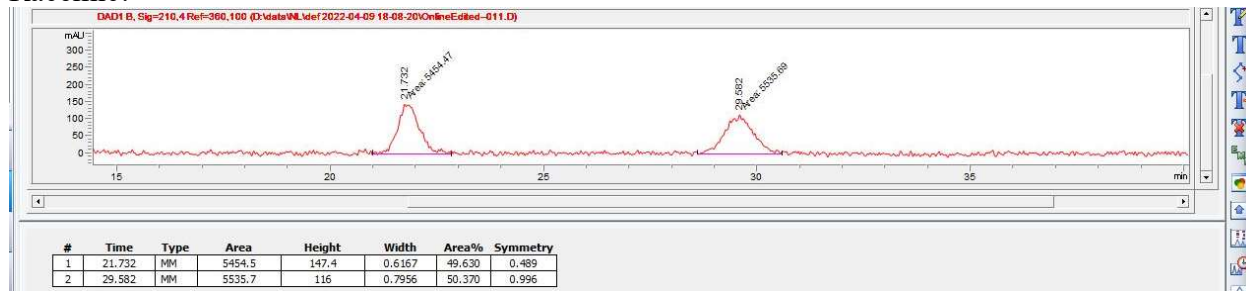

Biocatalytic Cyclization (with GluER “G6”):

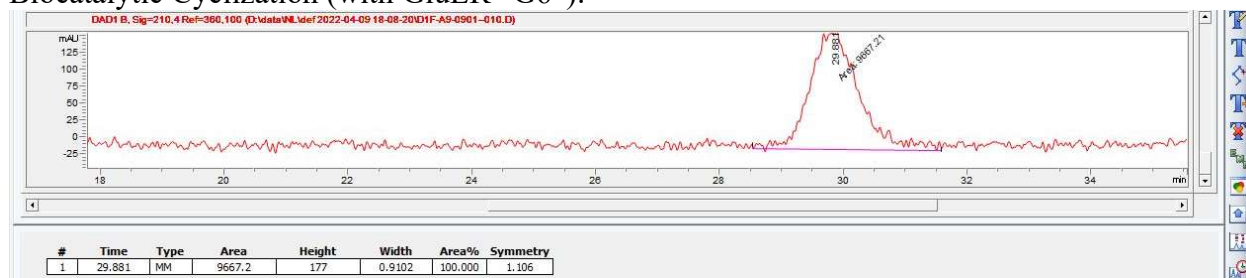

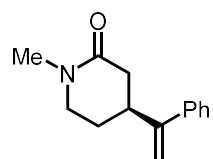

10

Biocatalytic Cyclization (with GluER “G6”):

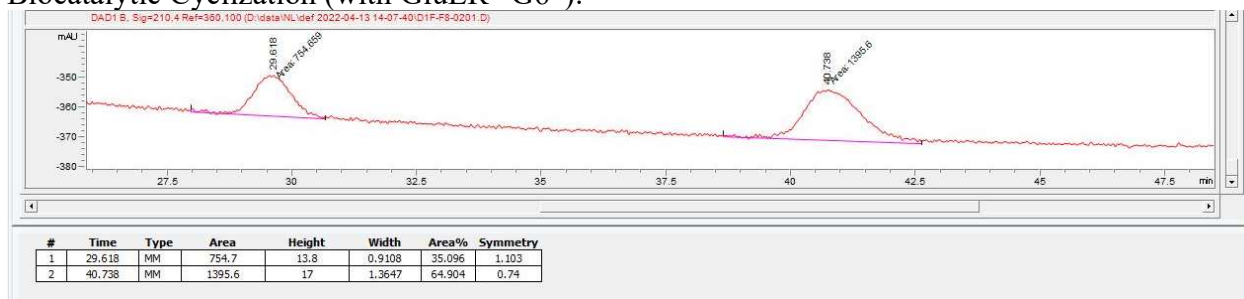

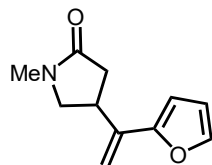

15

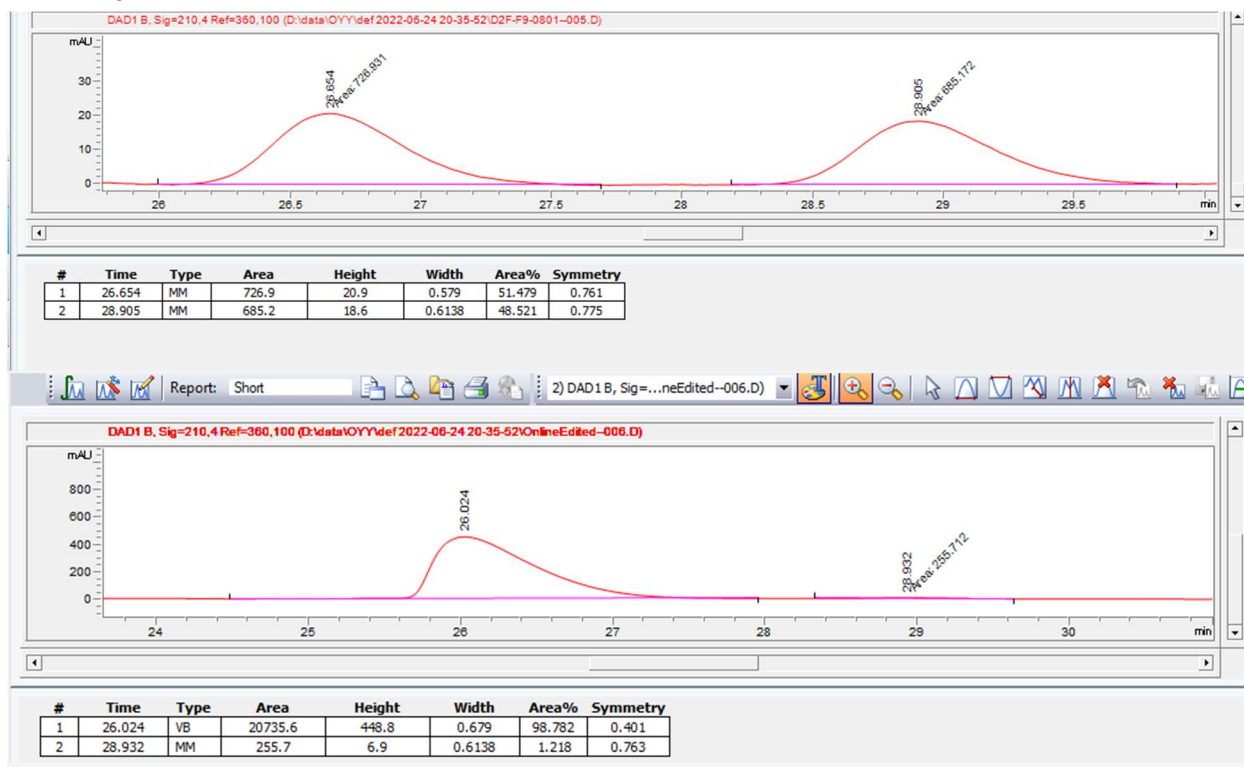

# <sup>1</sup>H and <sup>13</sup>C NMR of Substrates and Products

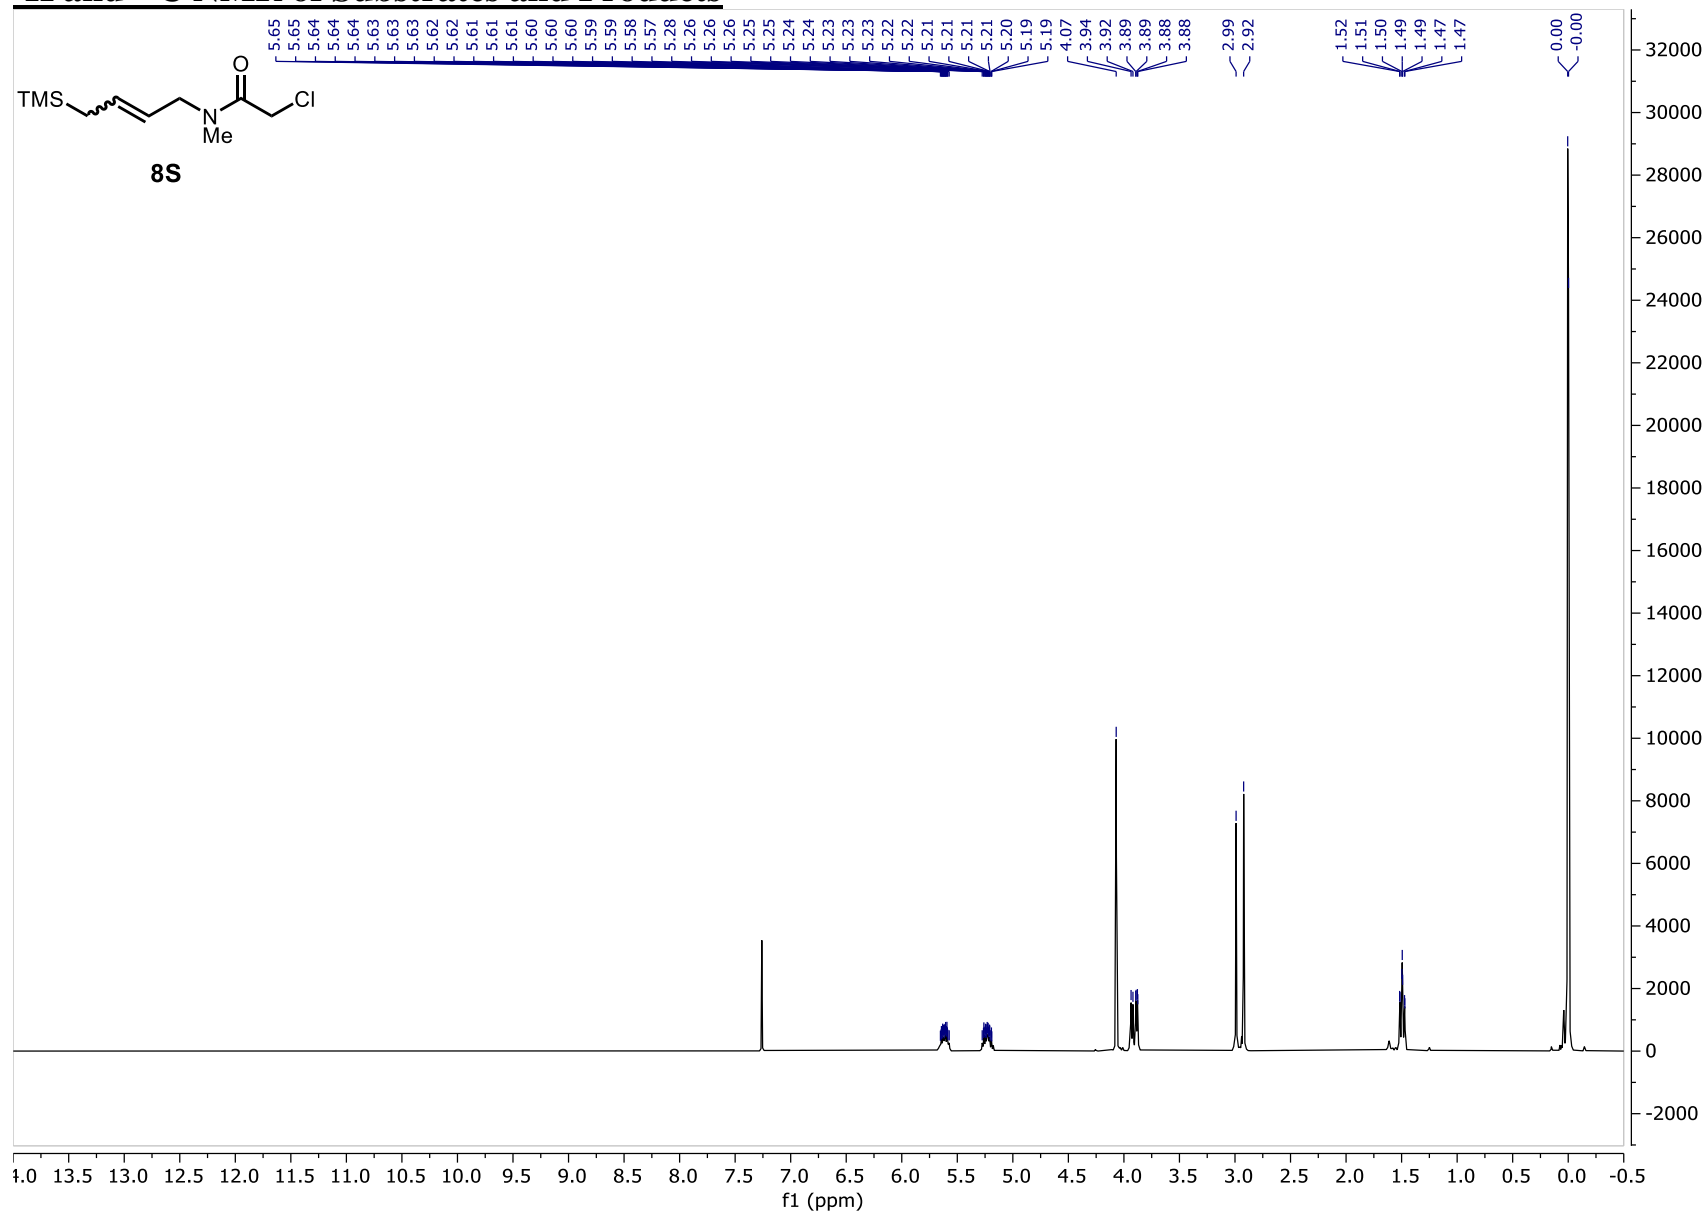

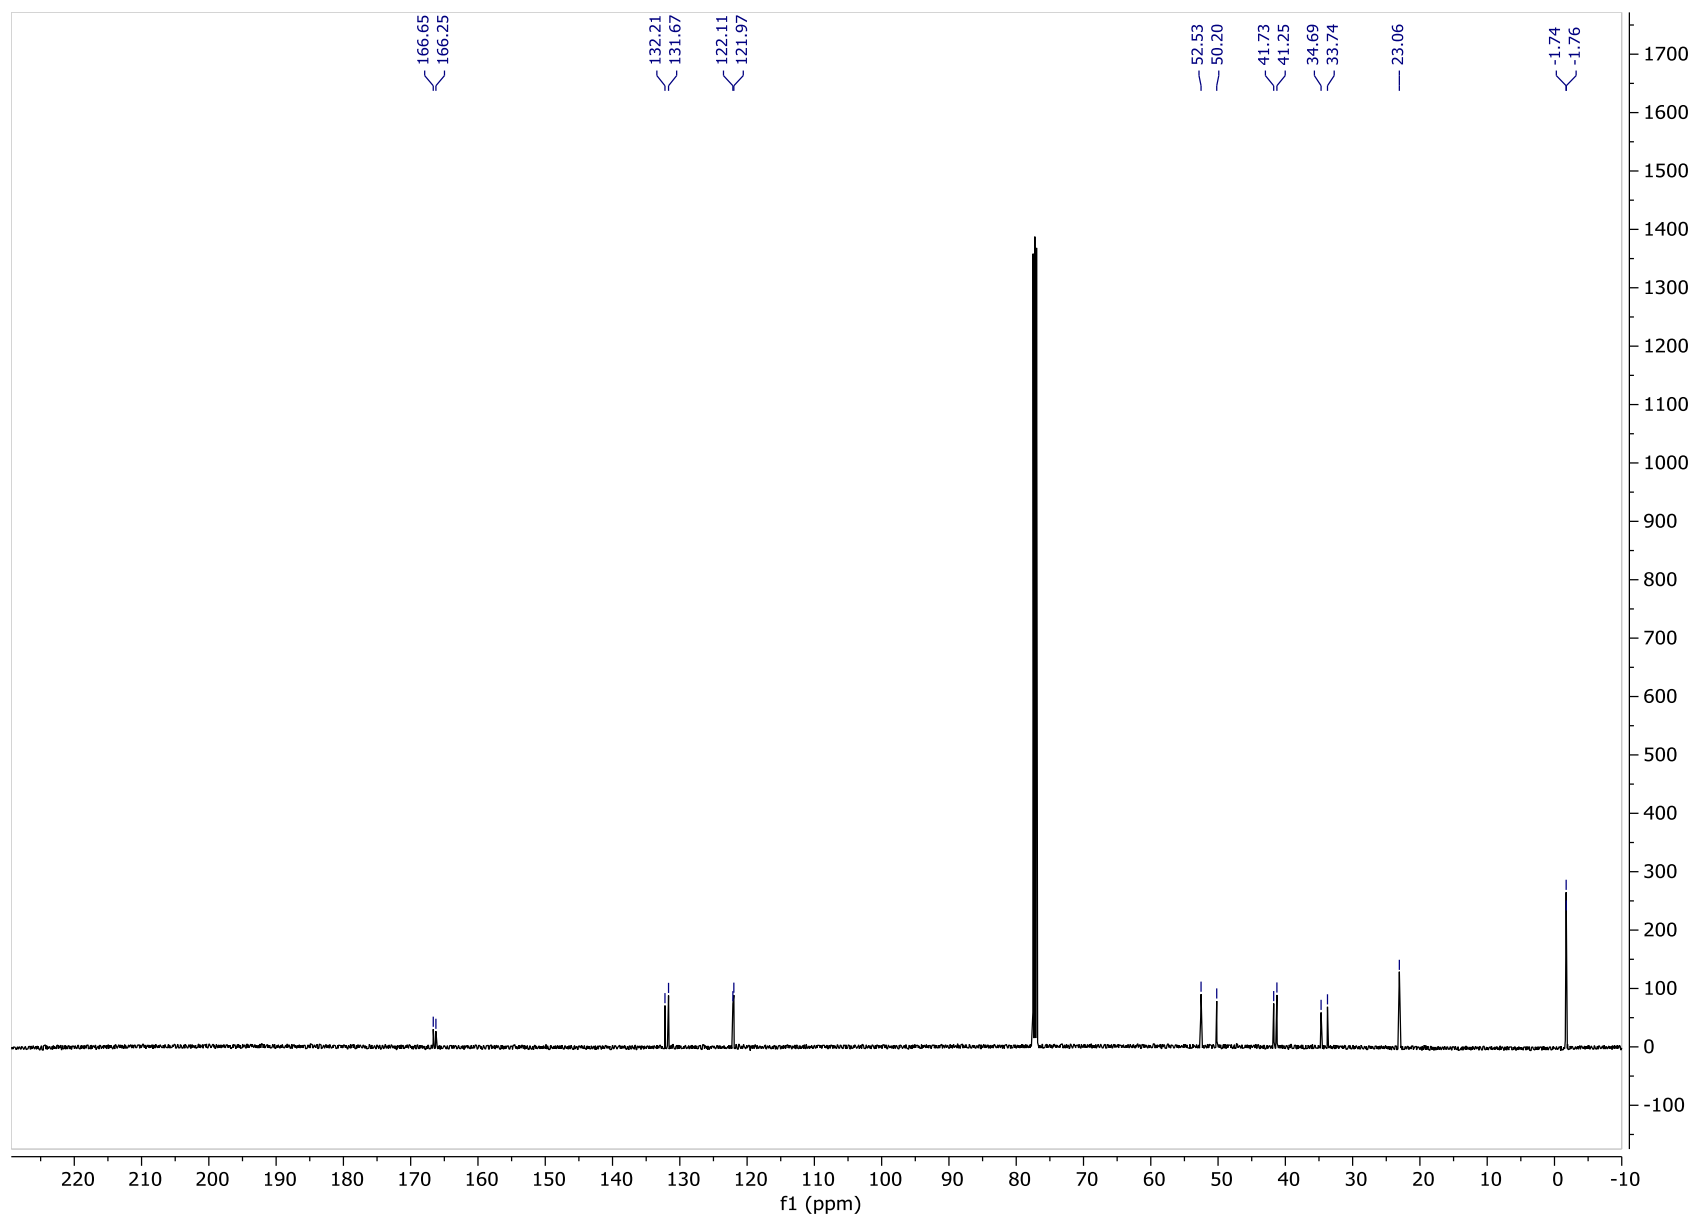

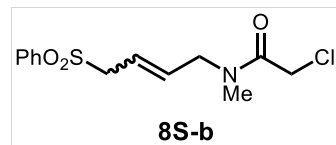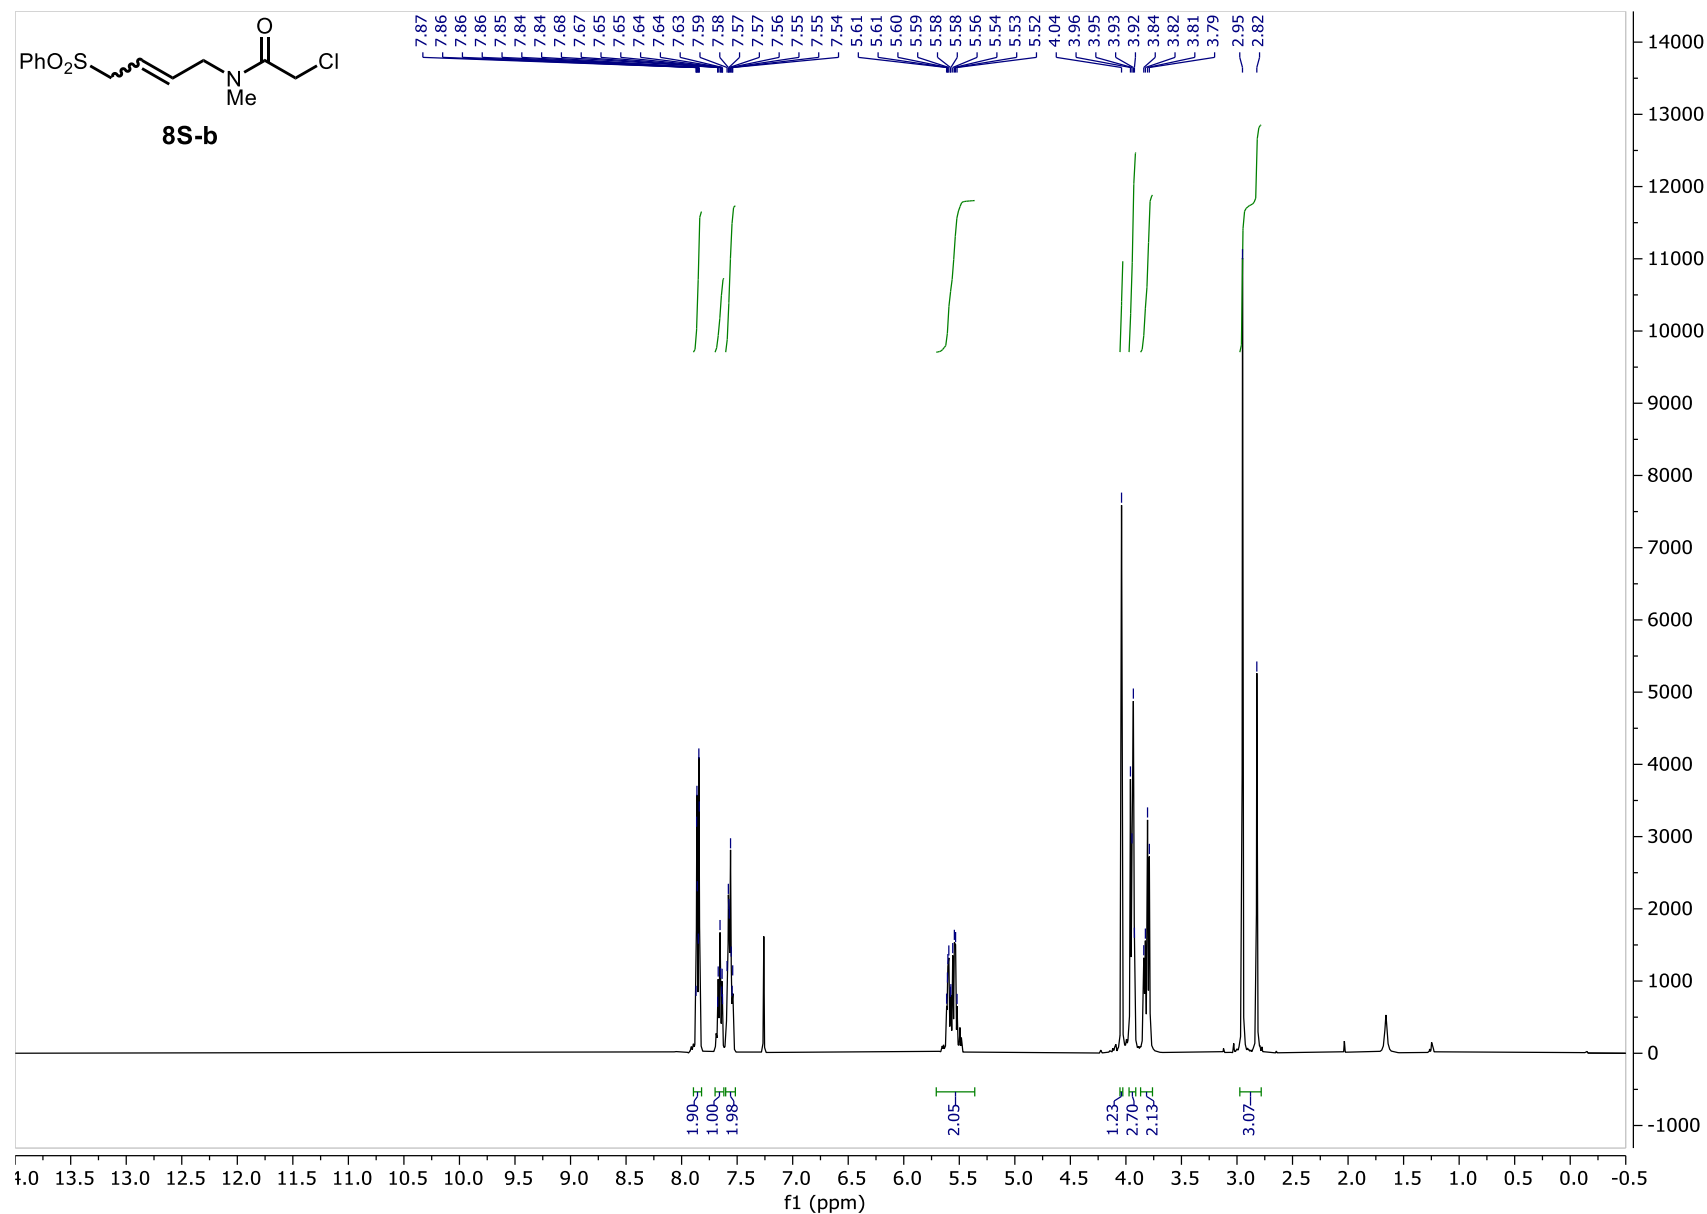

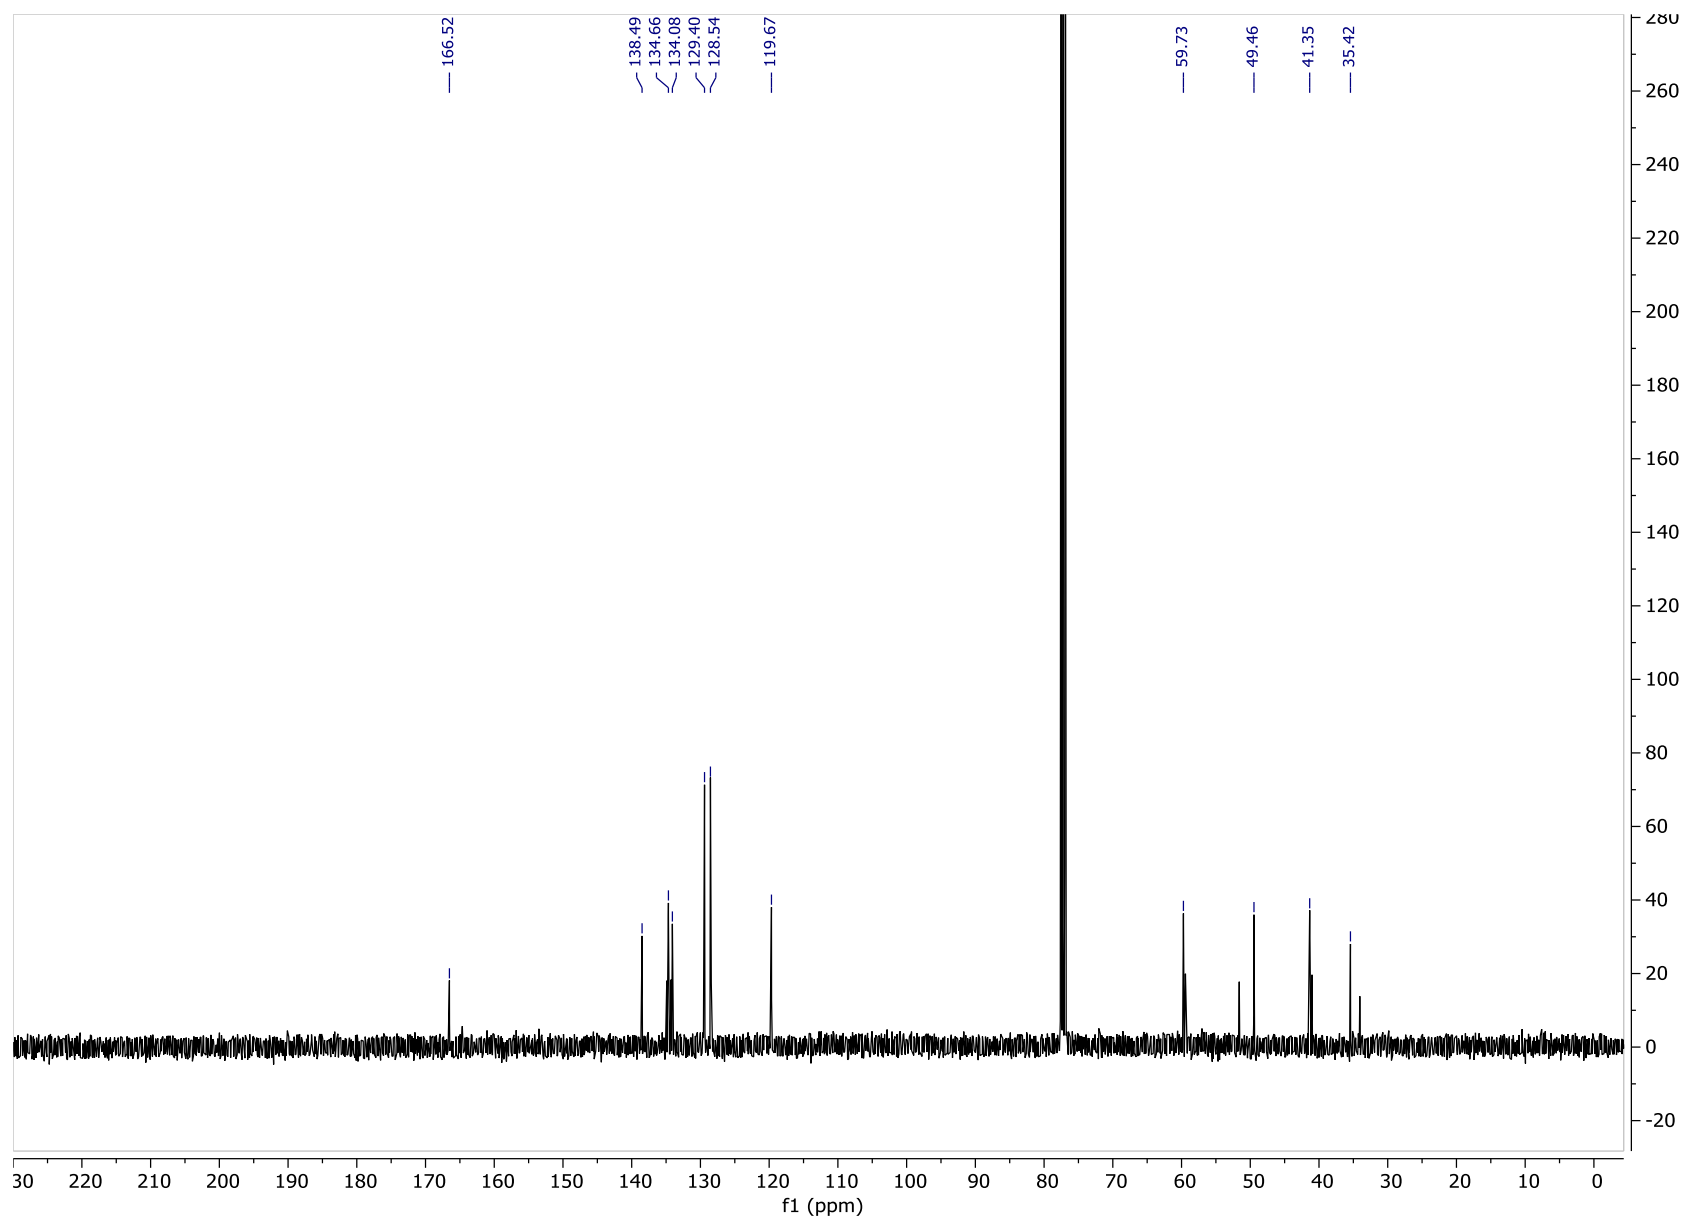

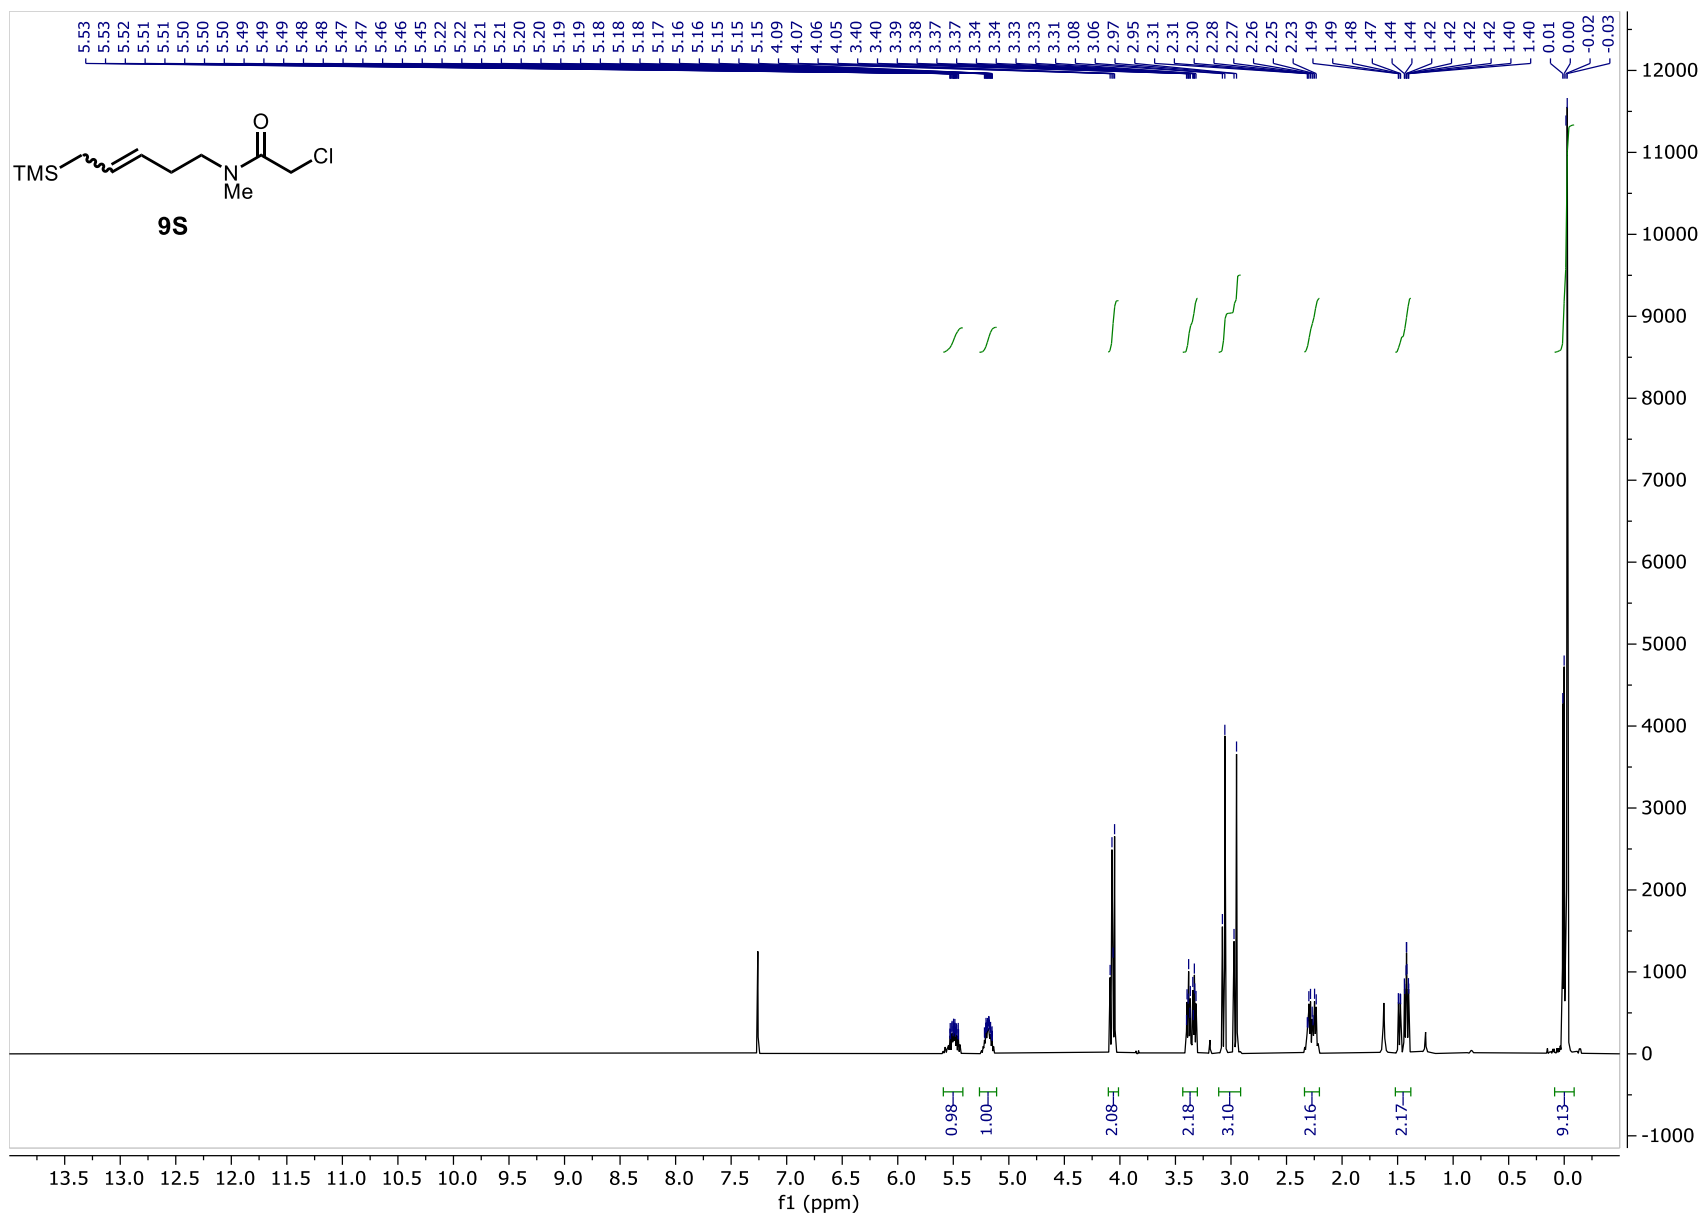

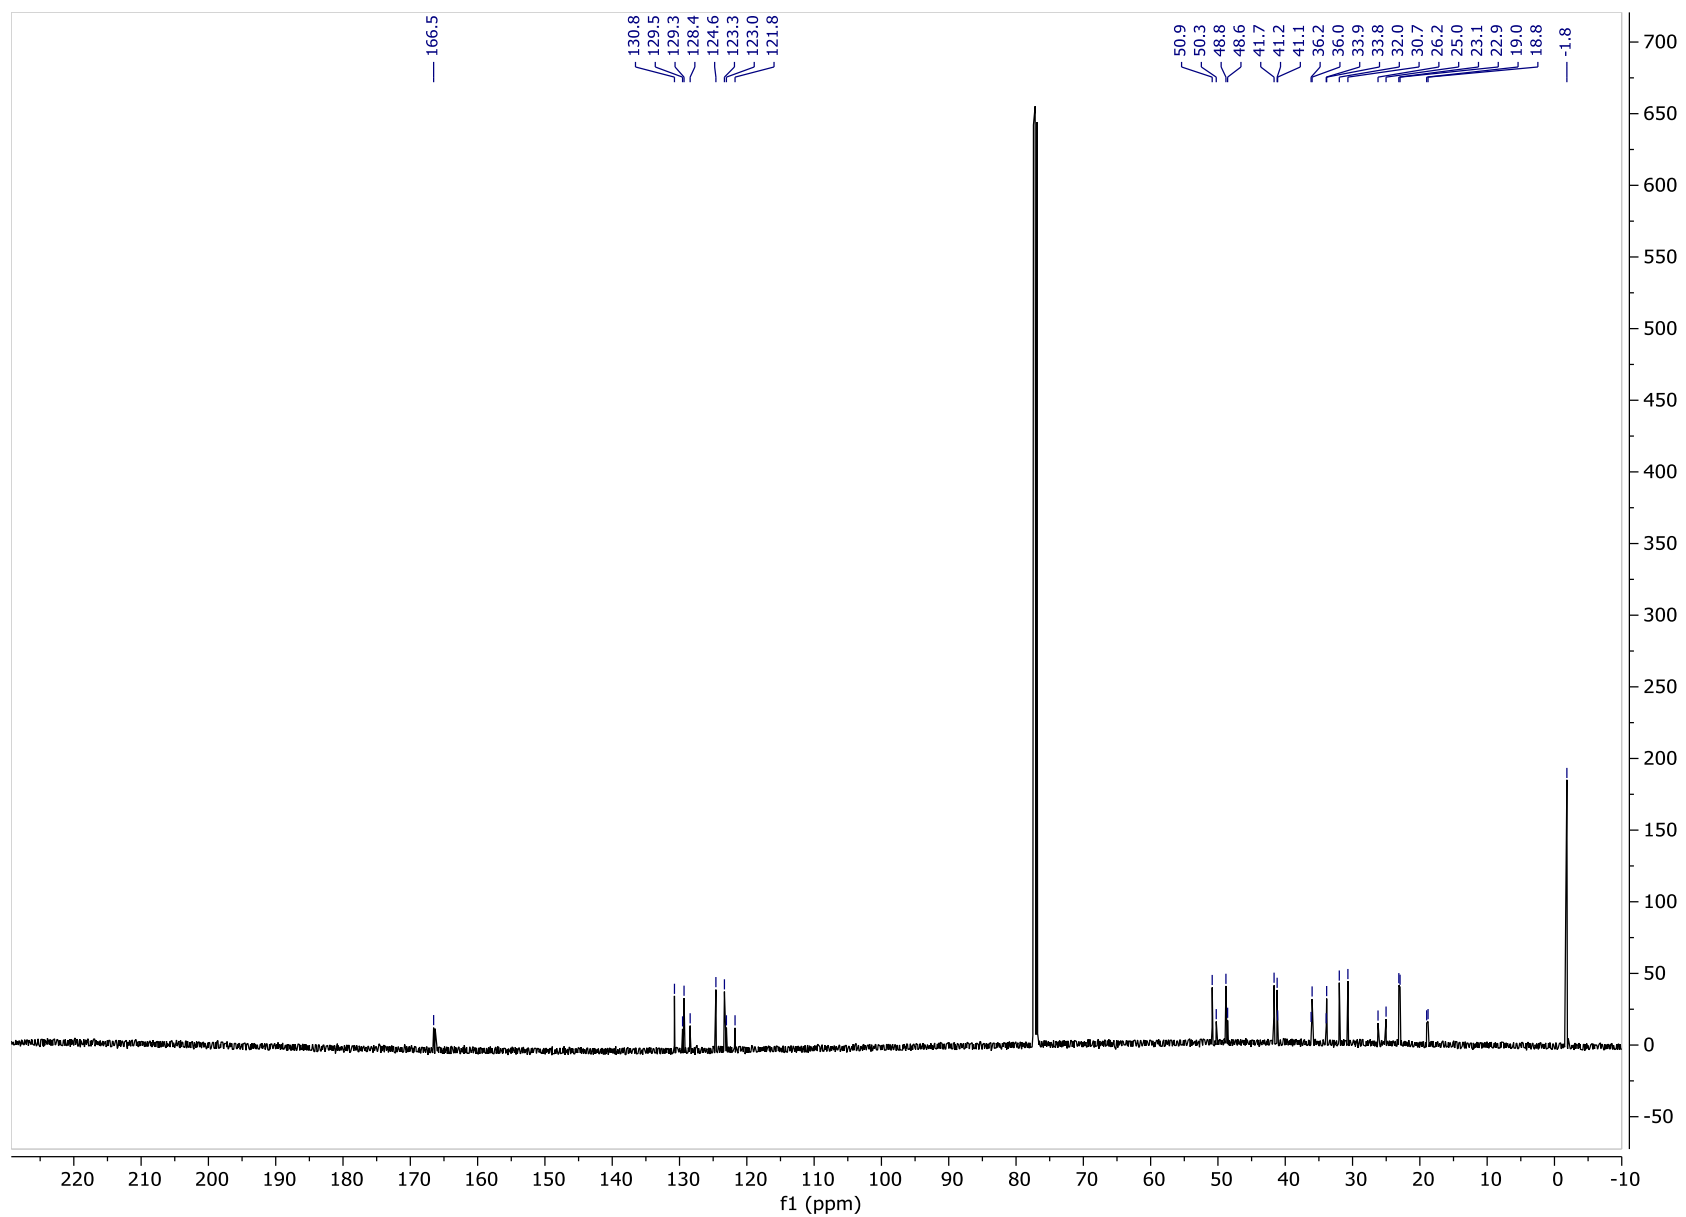

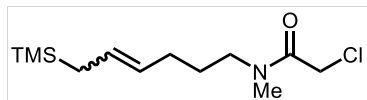

**10S**

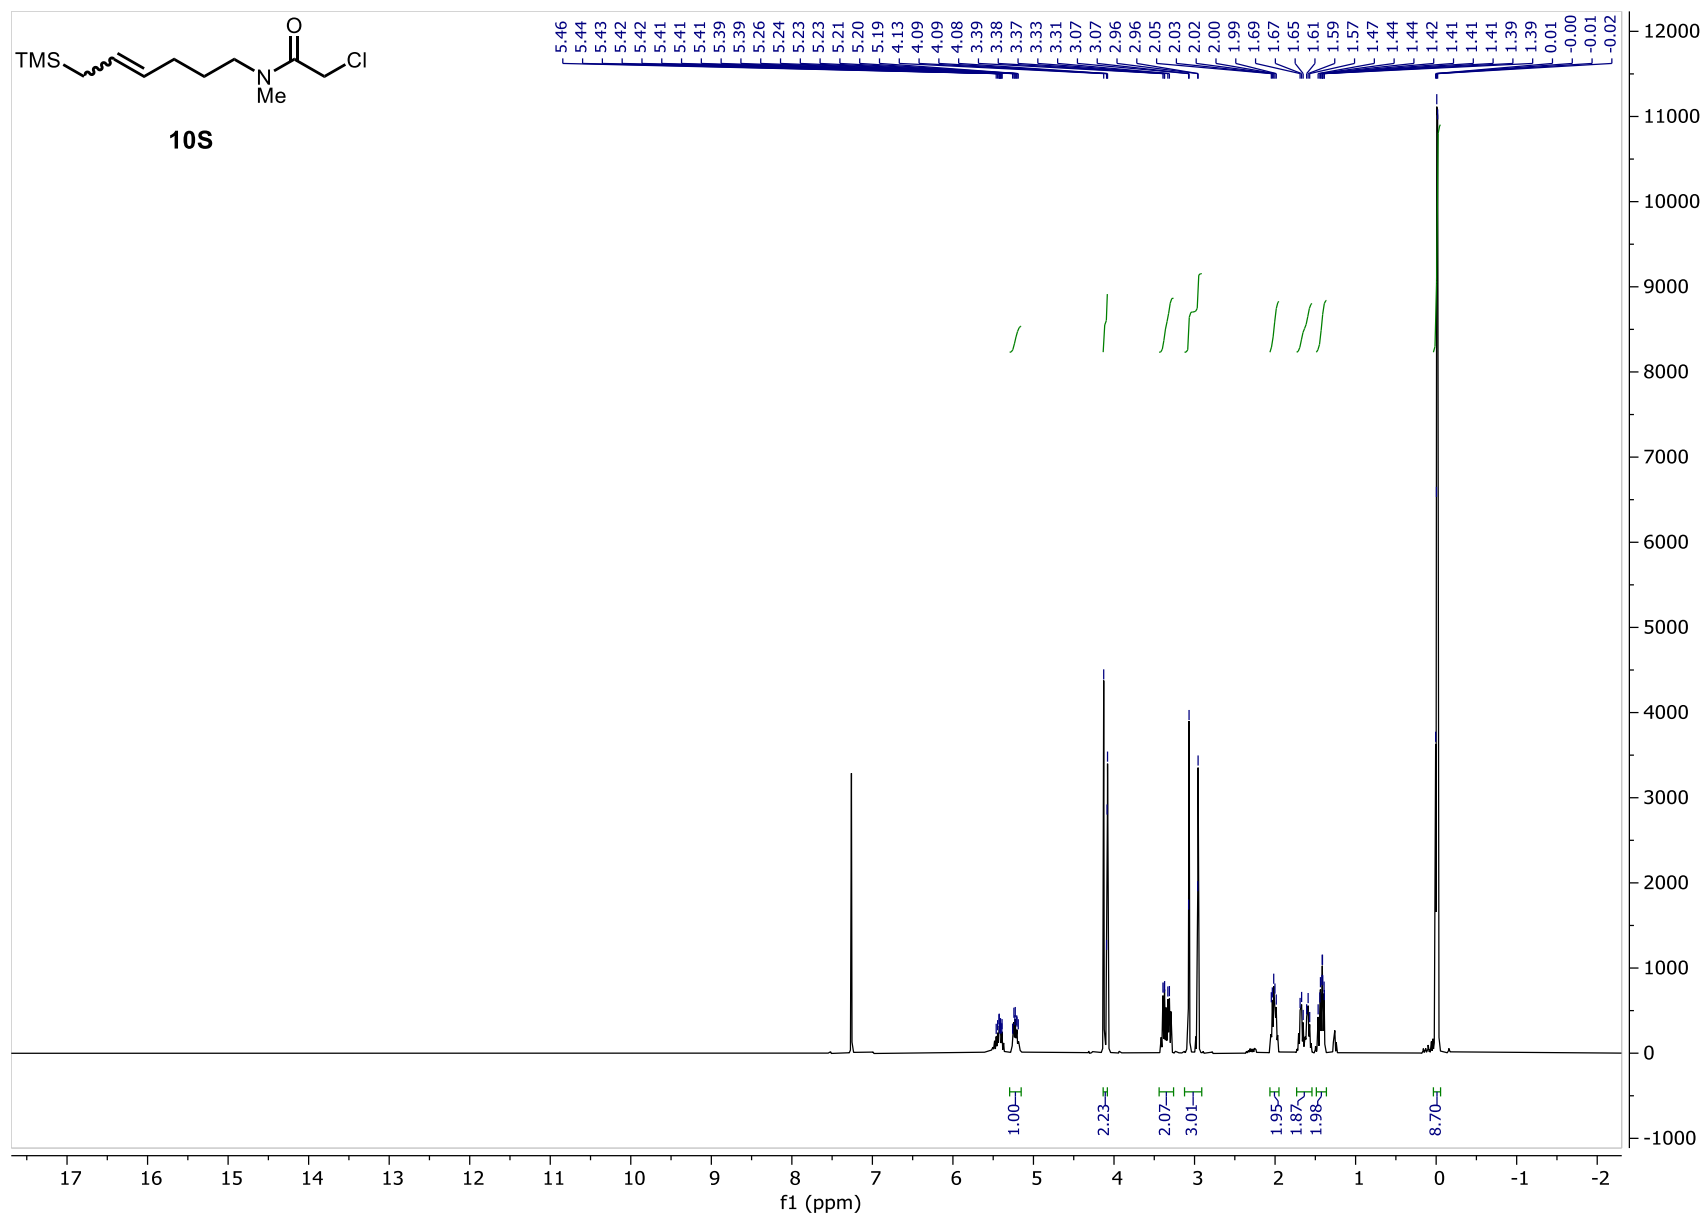

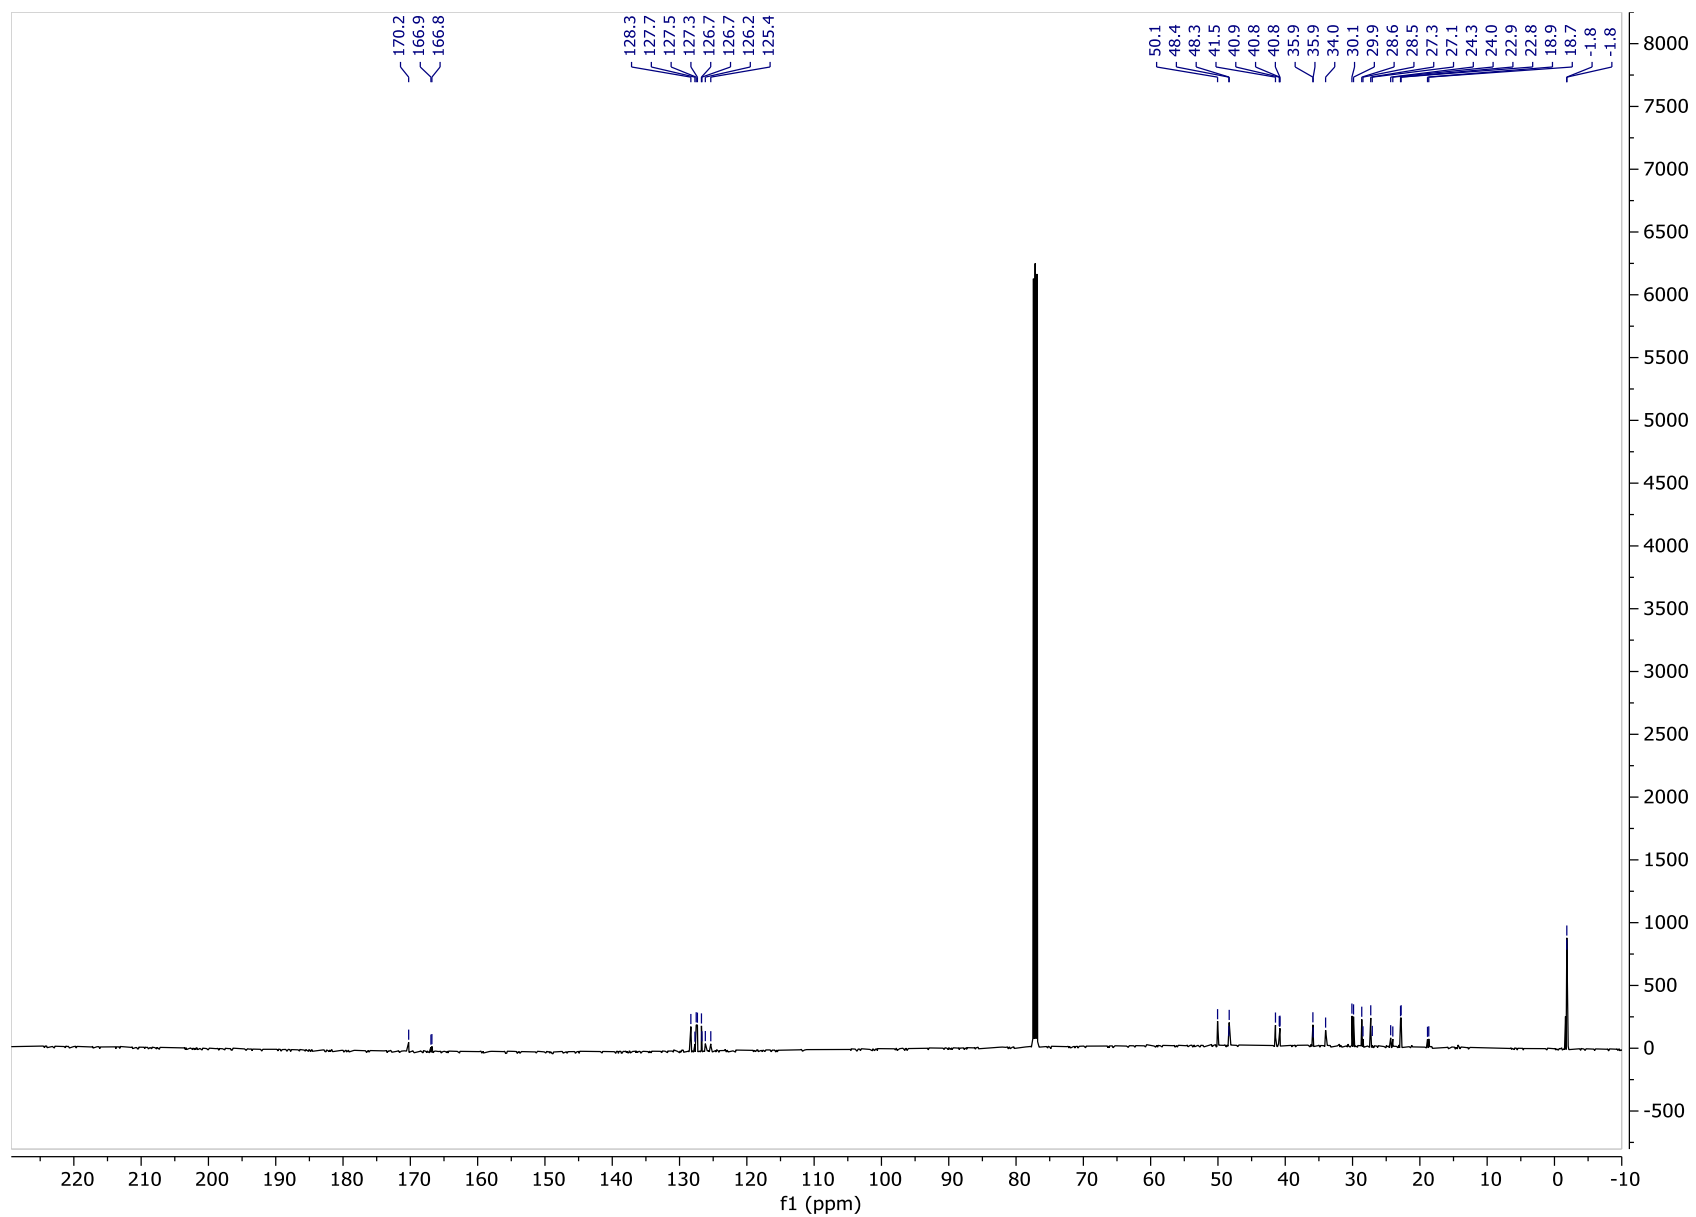

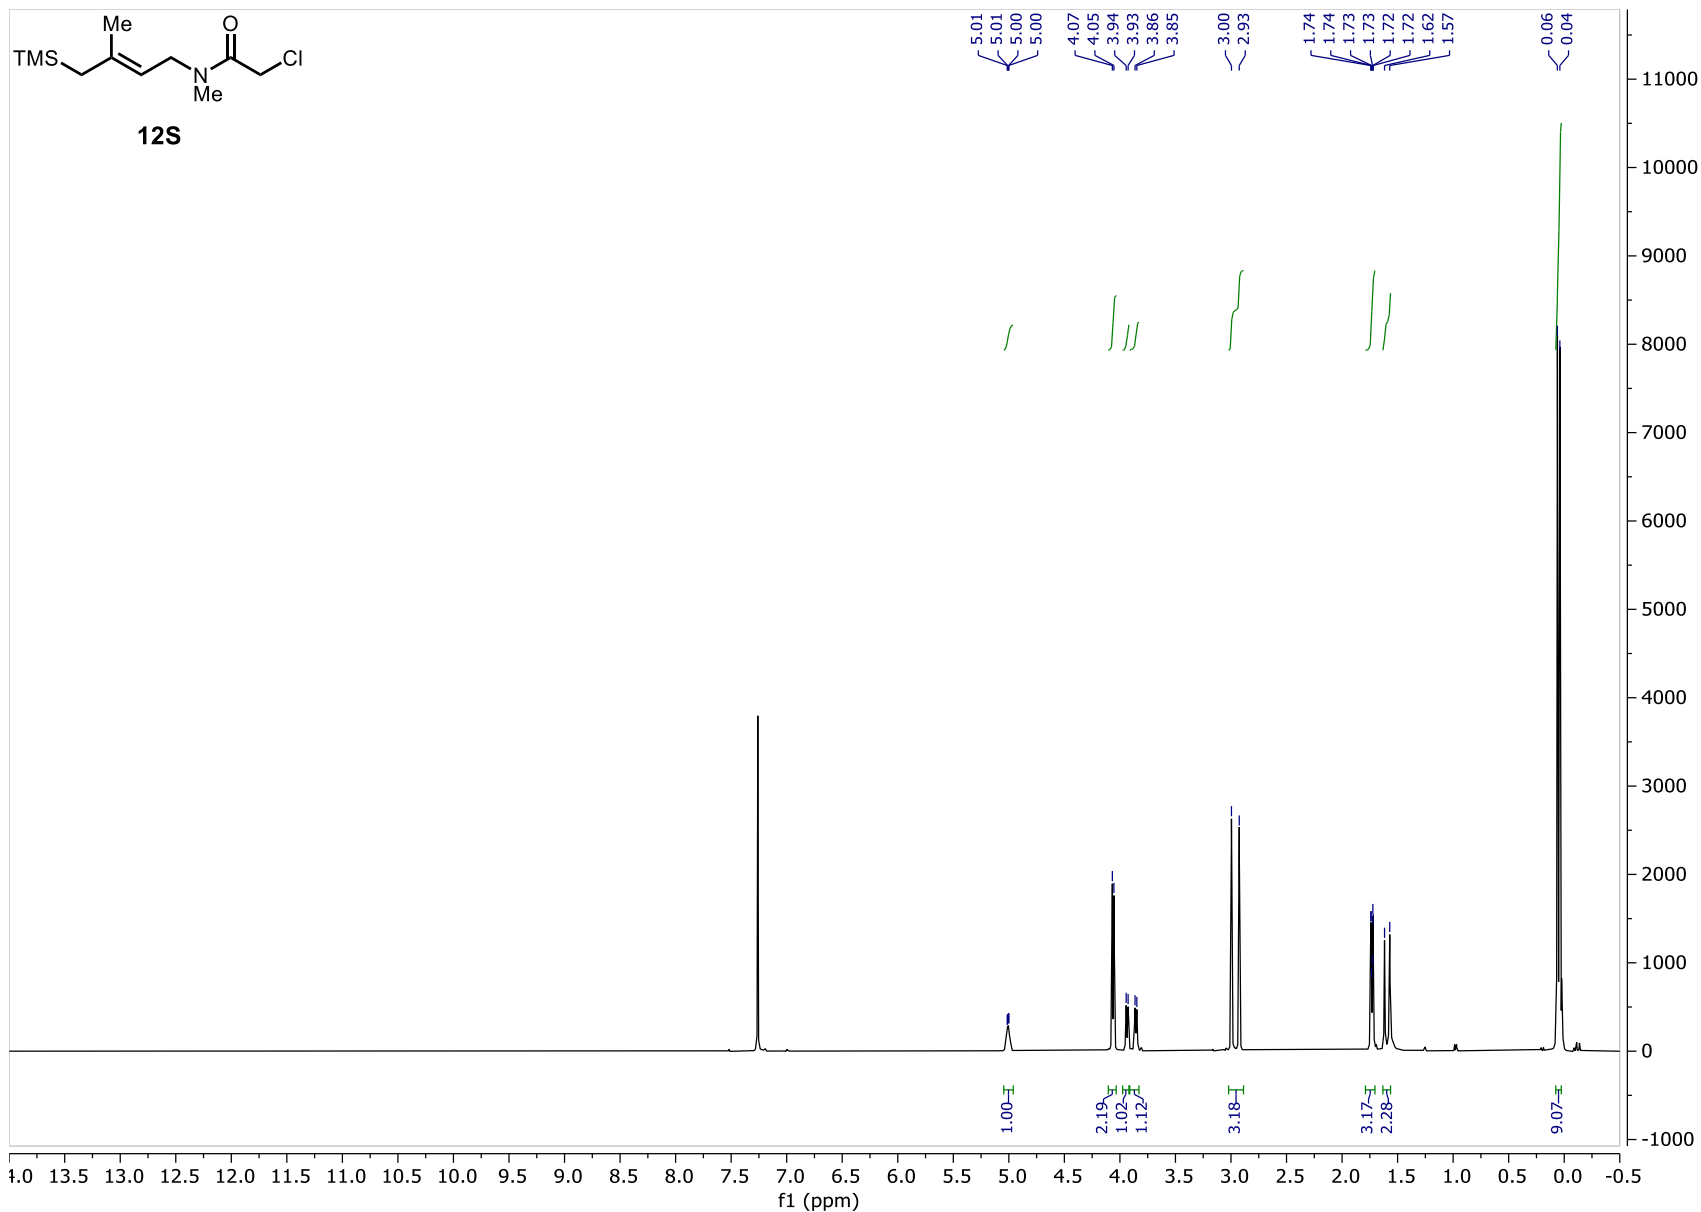

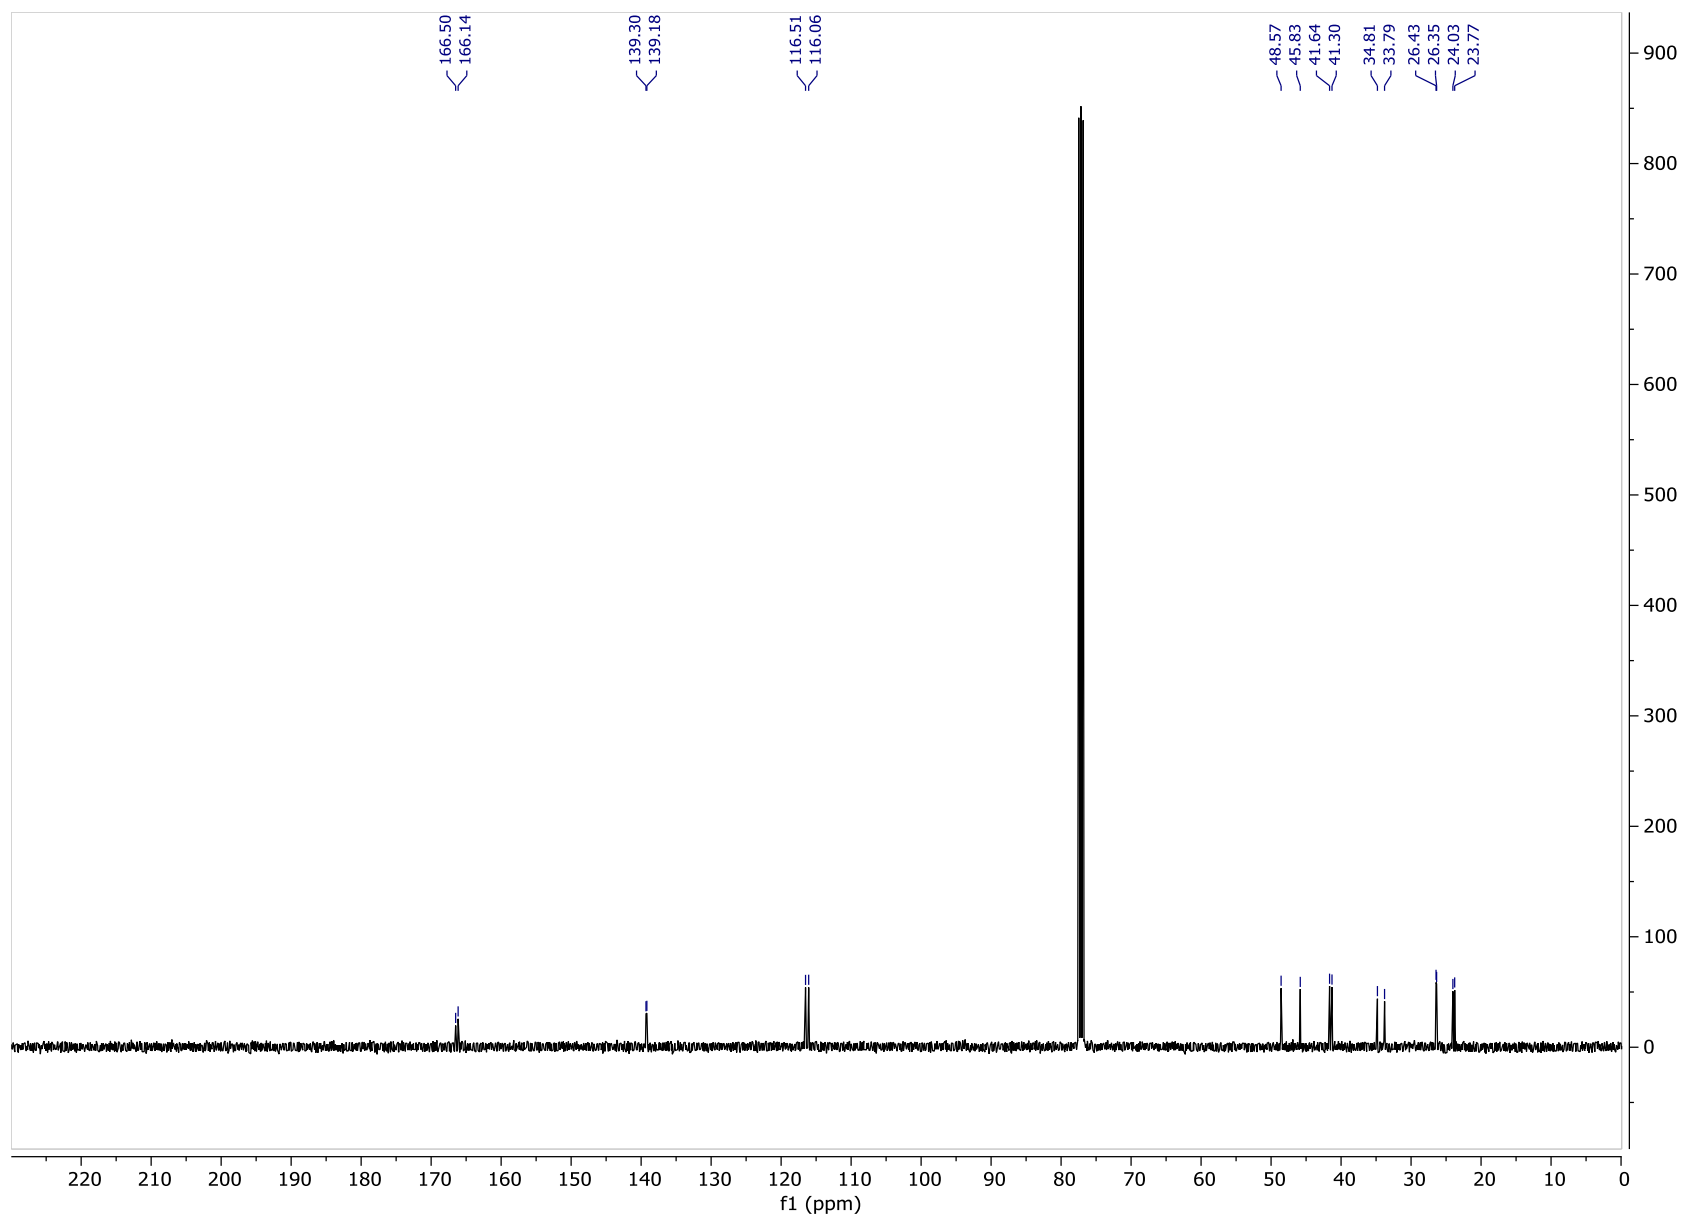

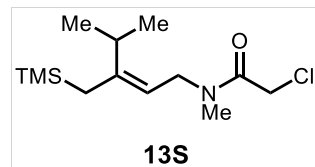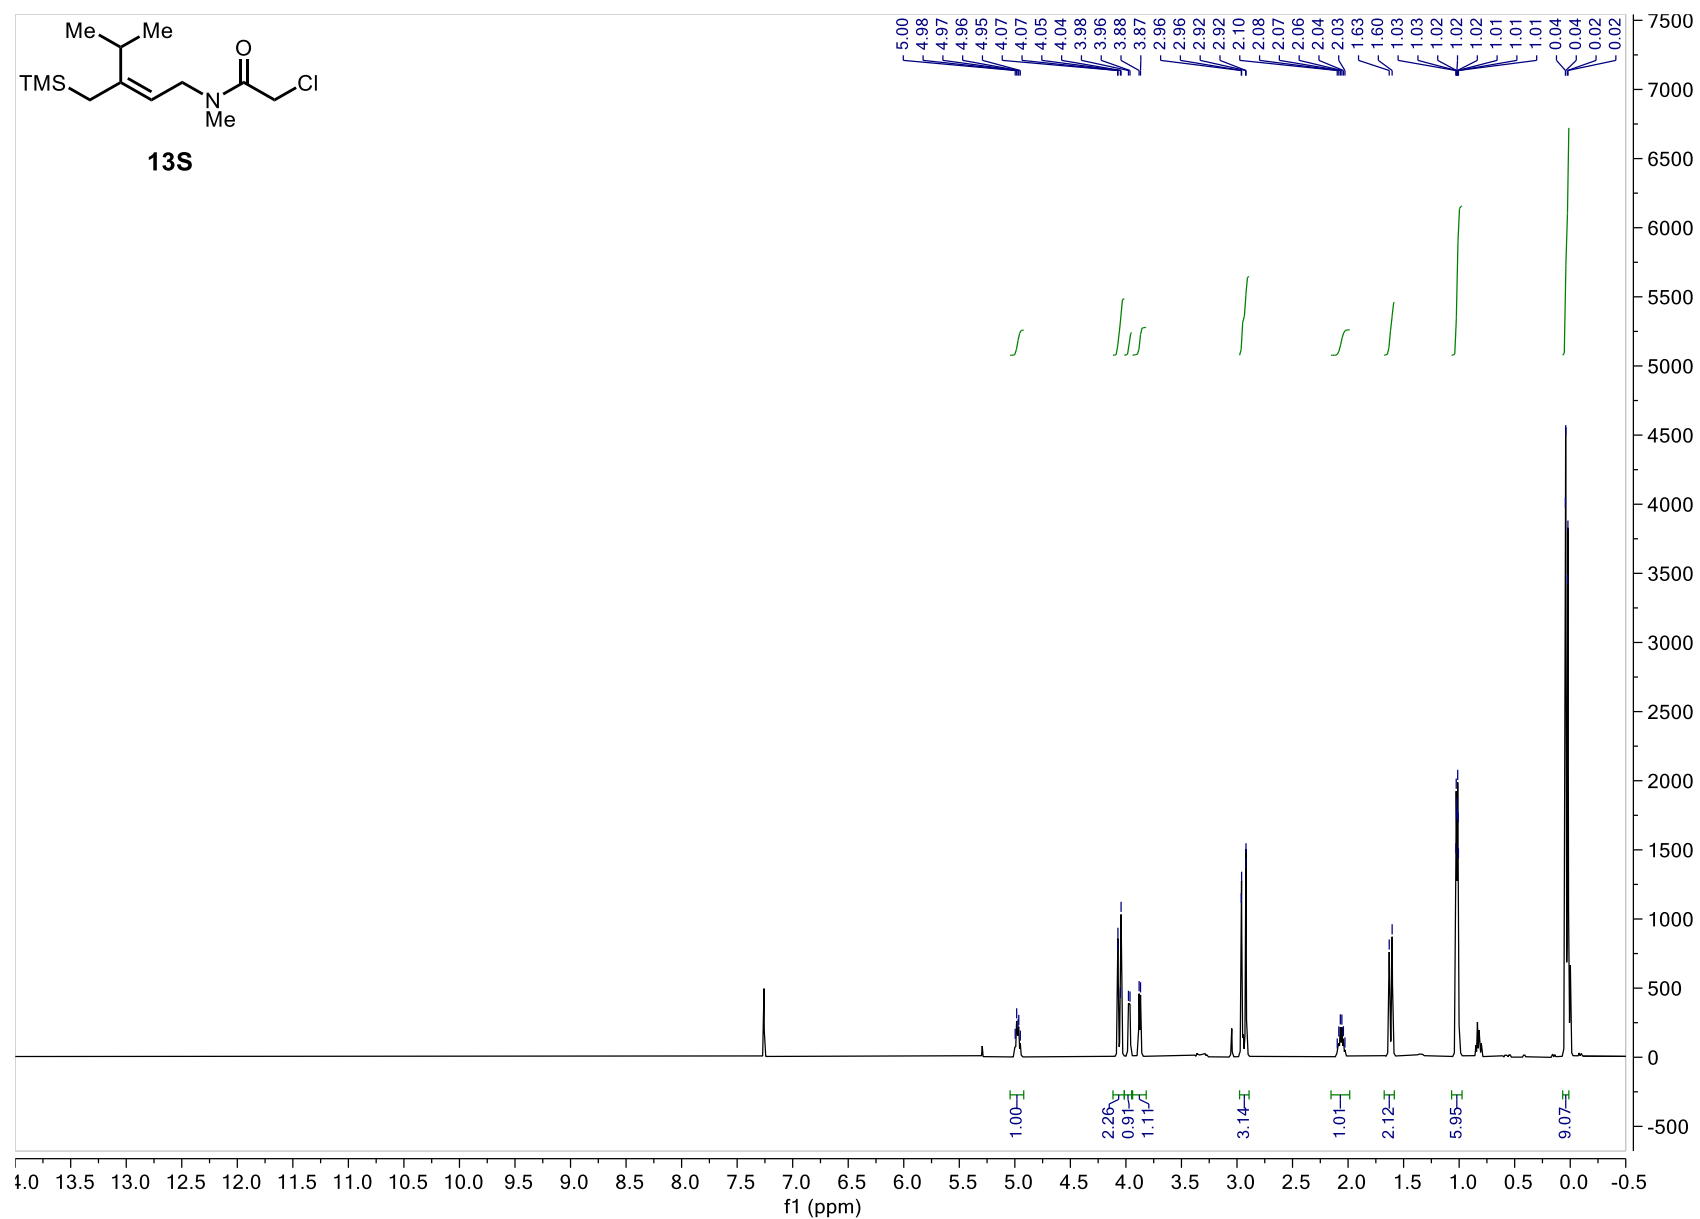

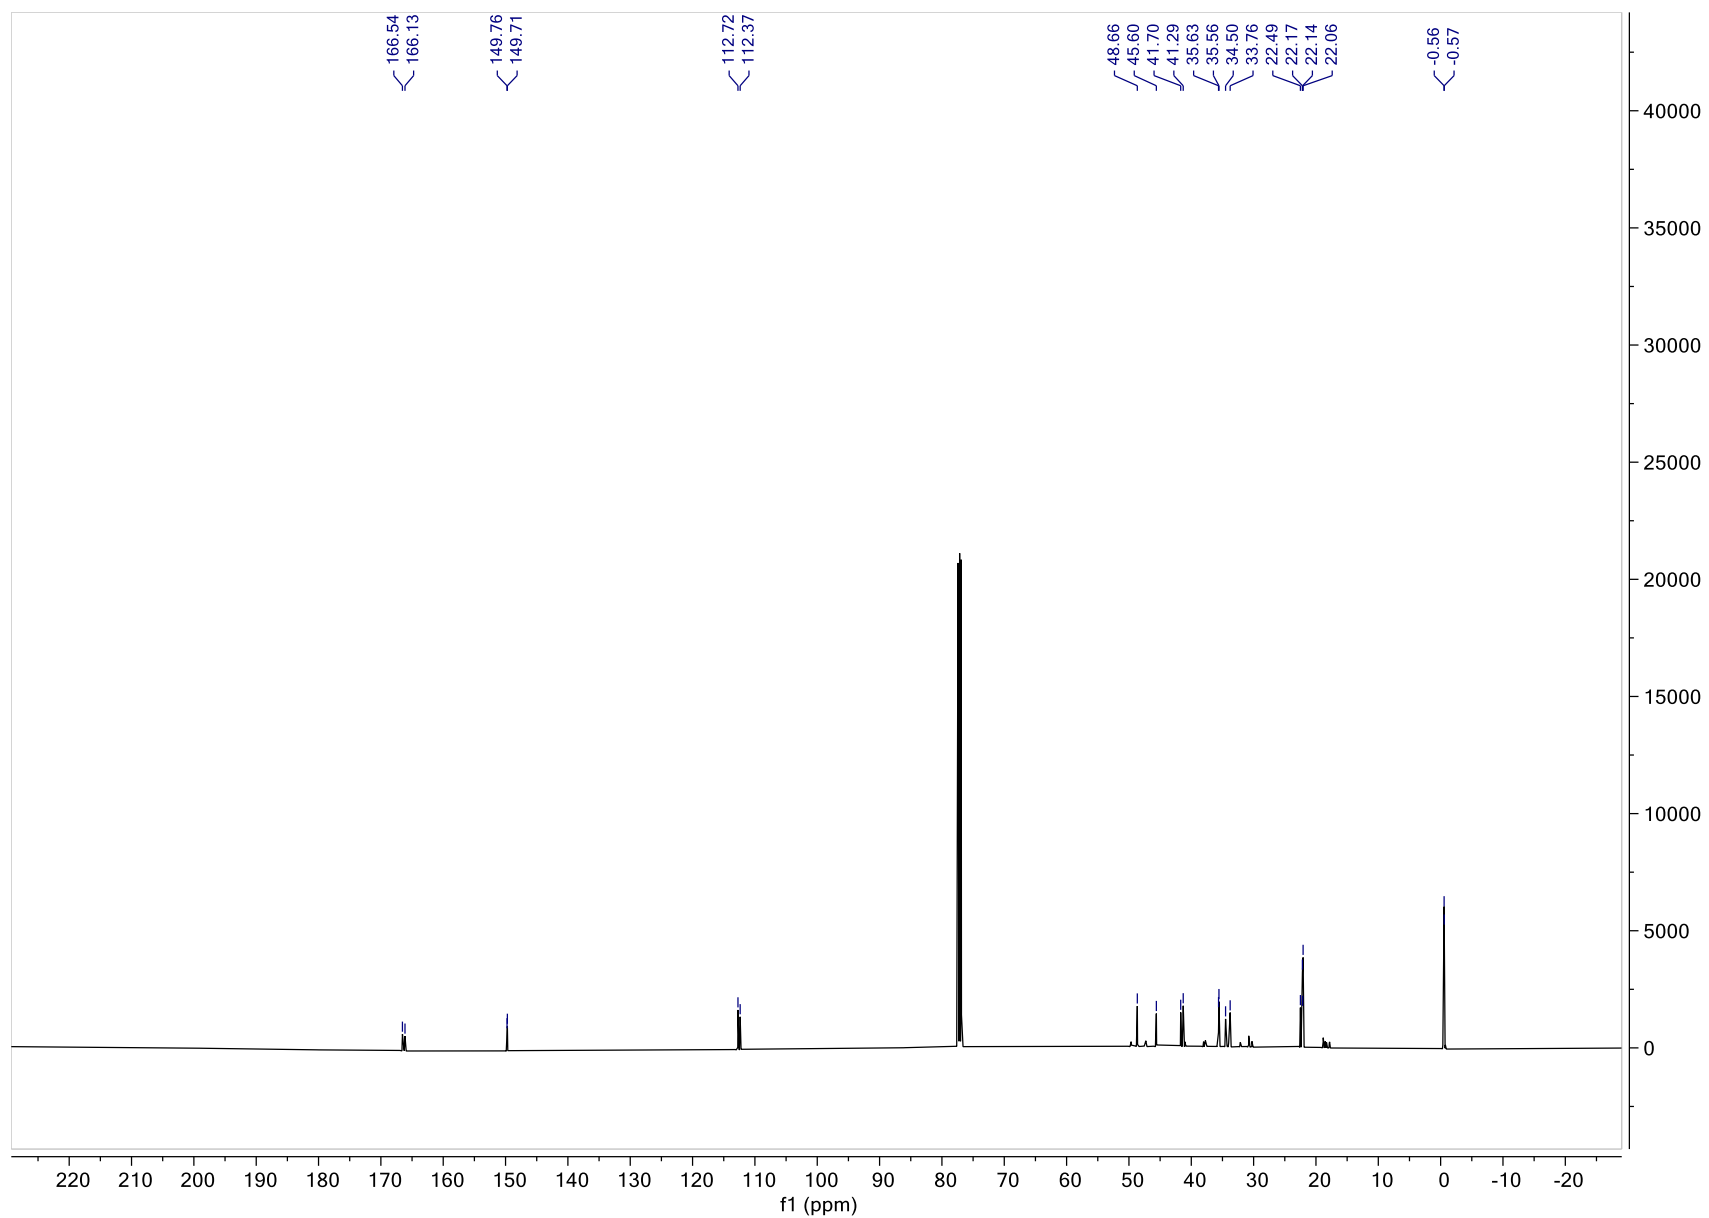

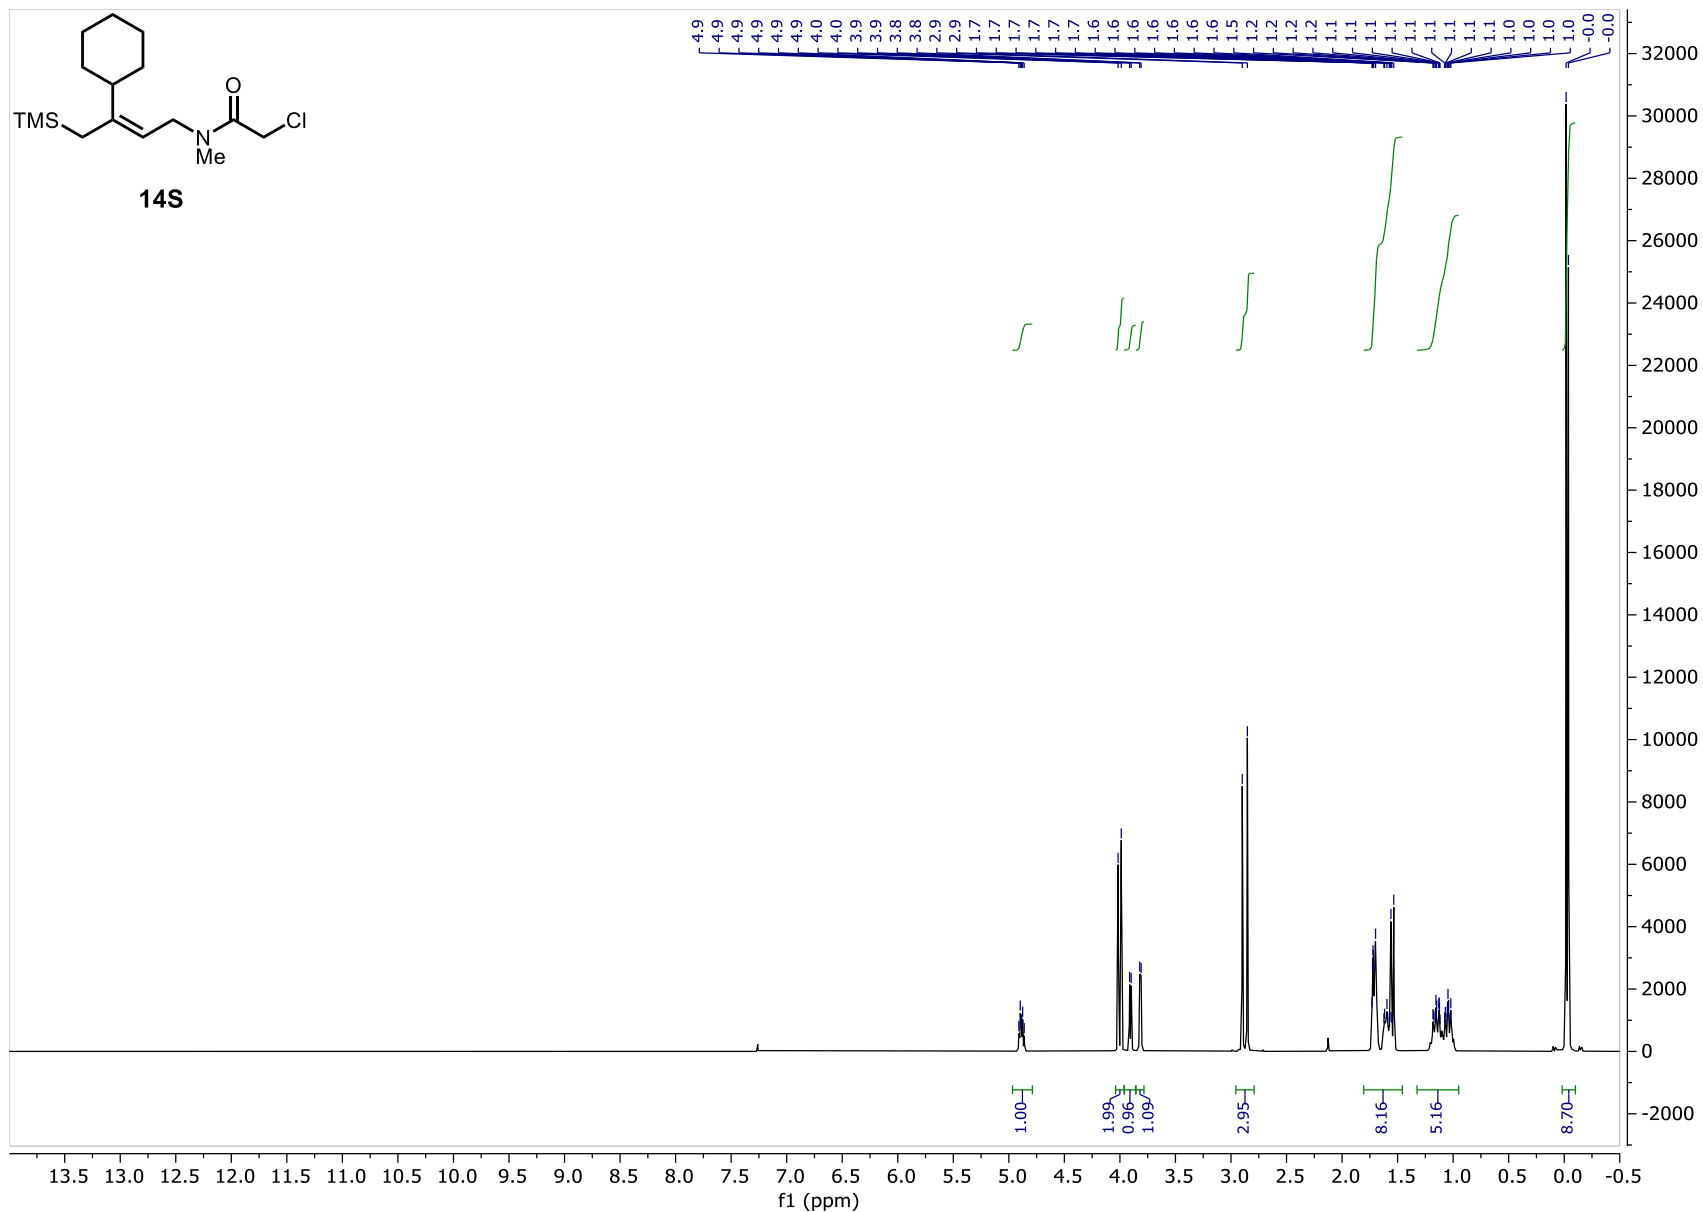

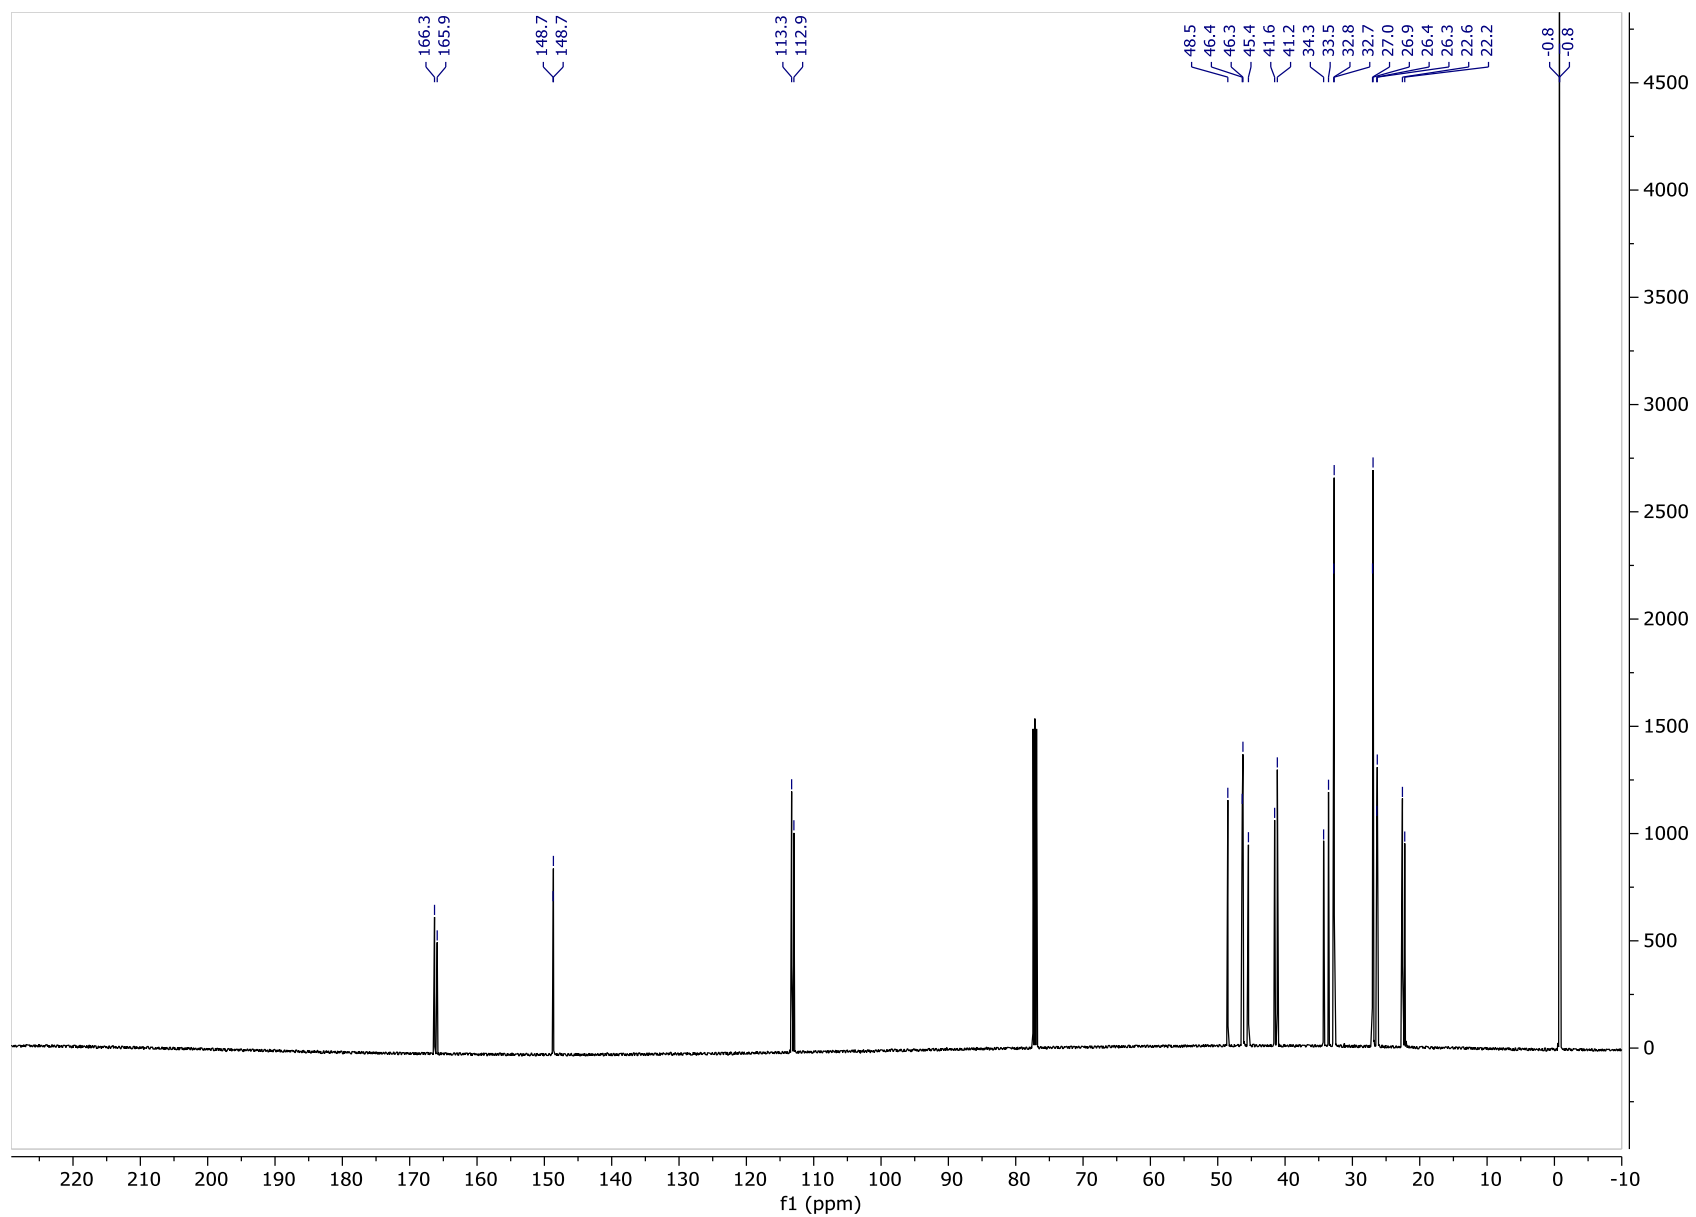

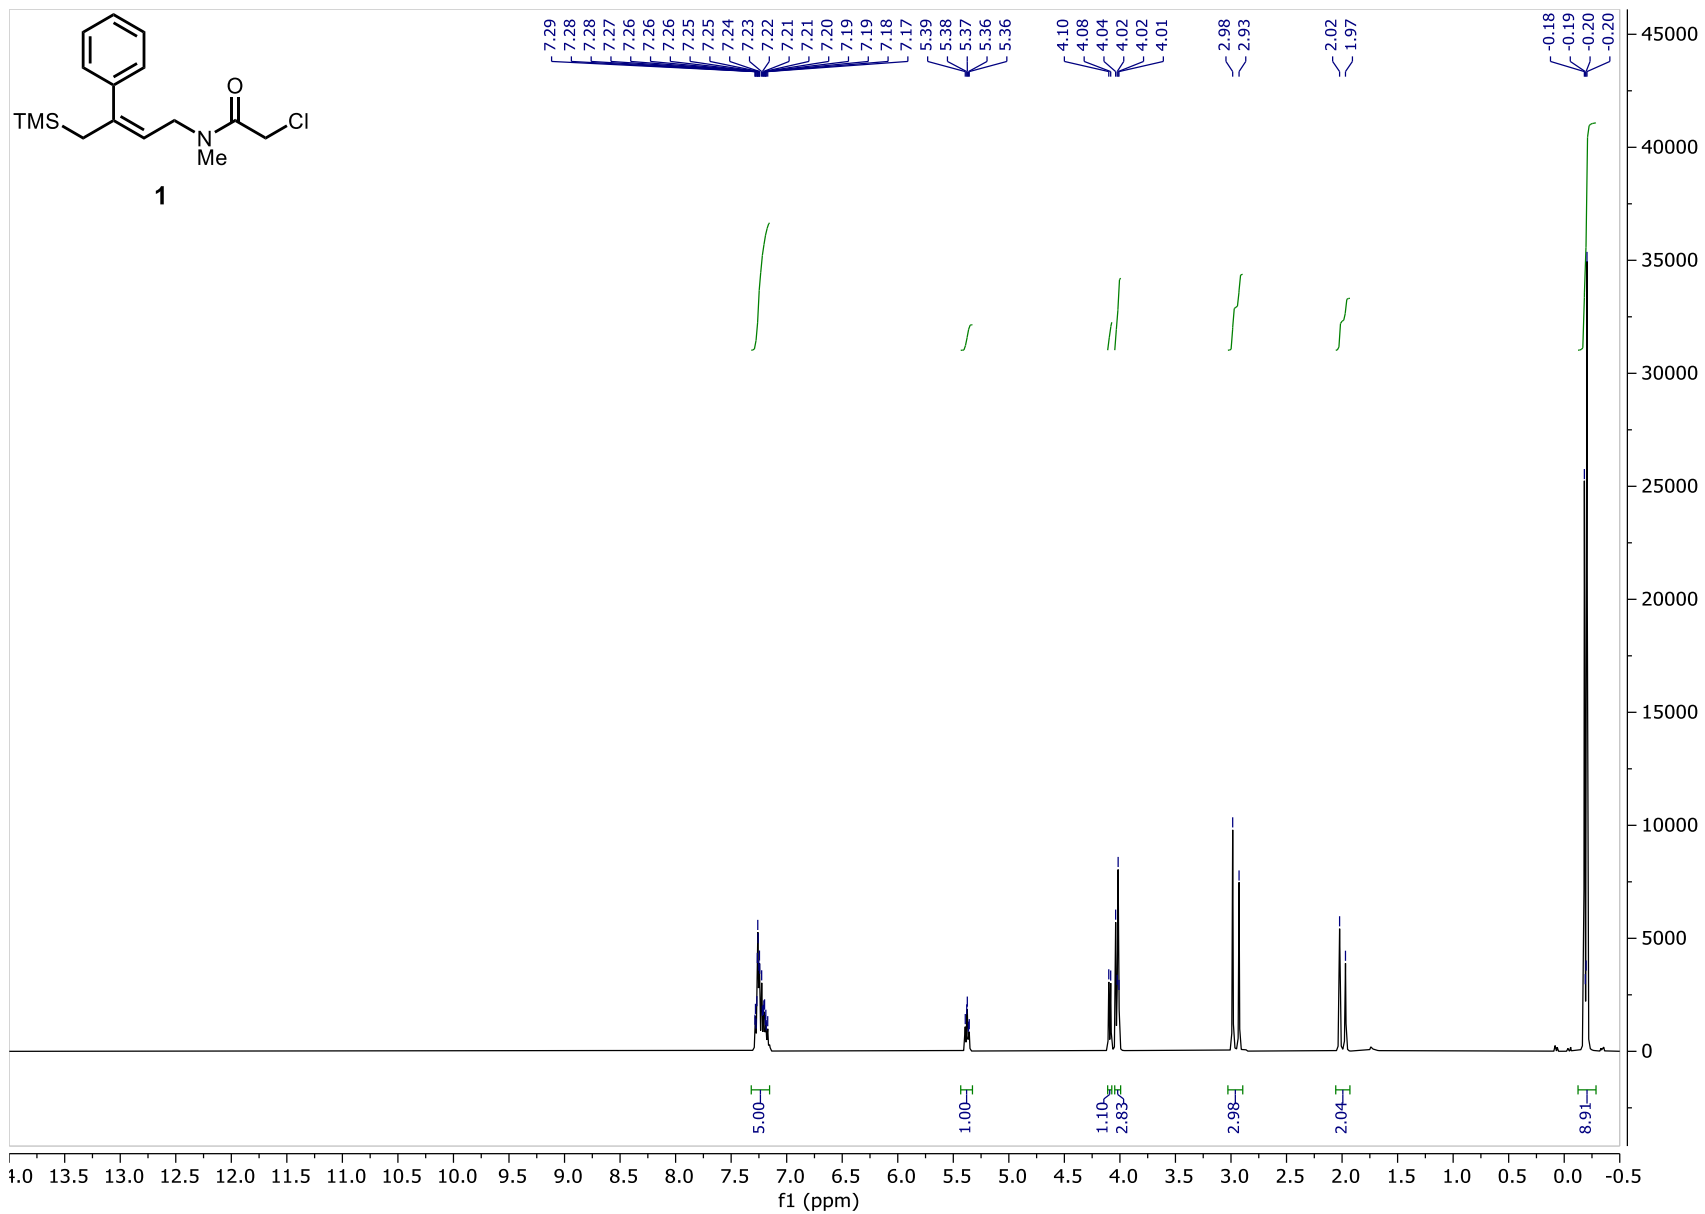

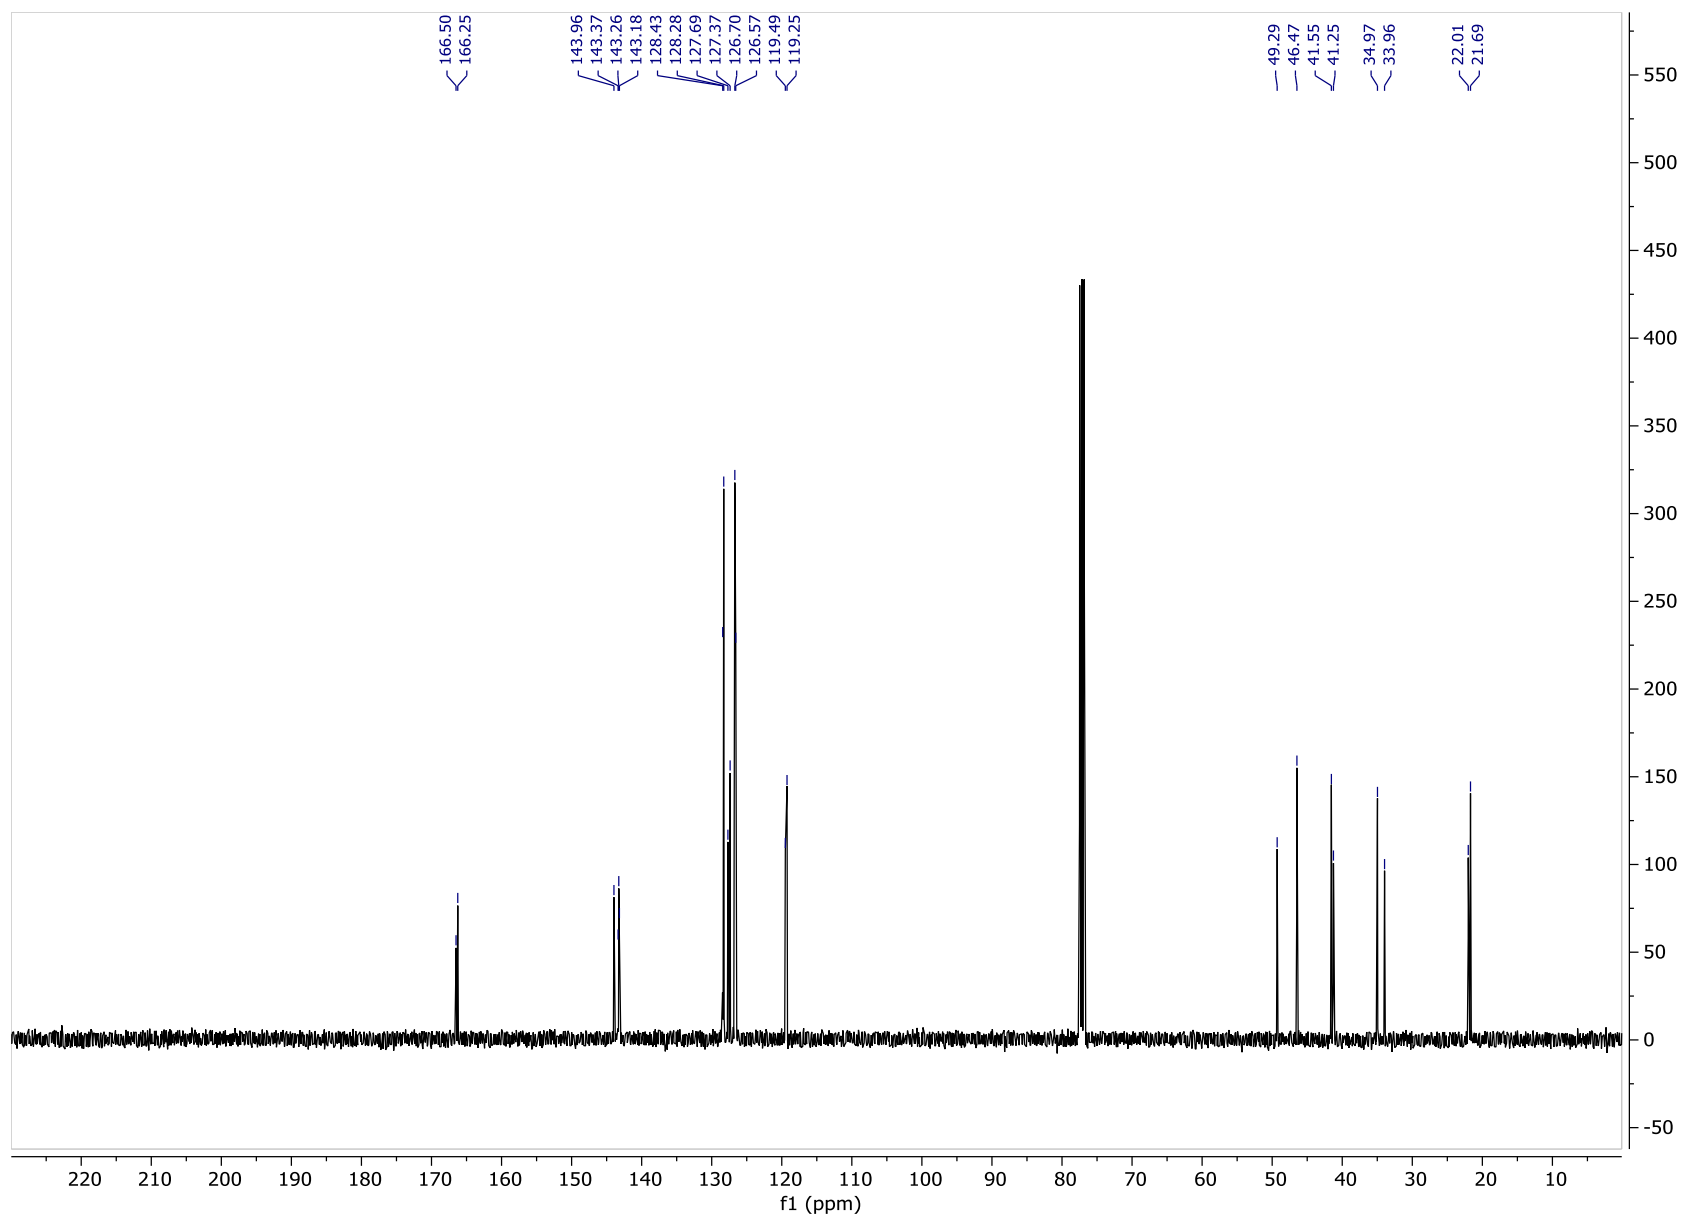

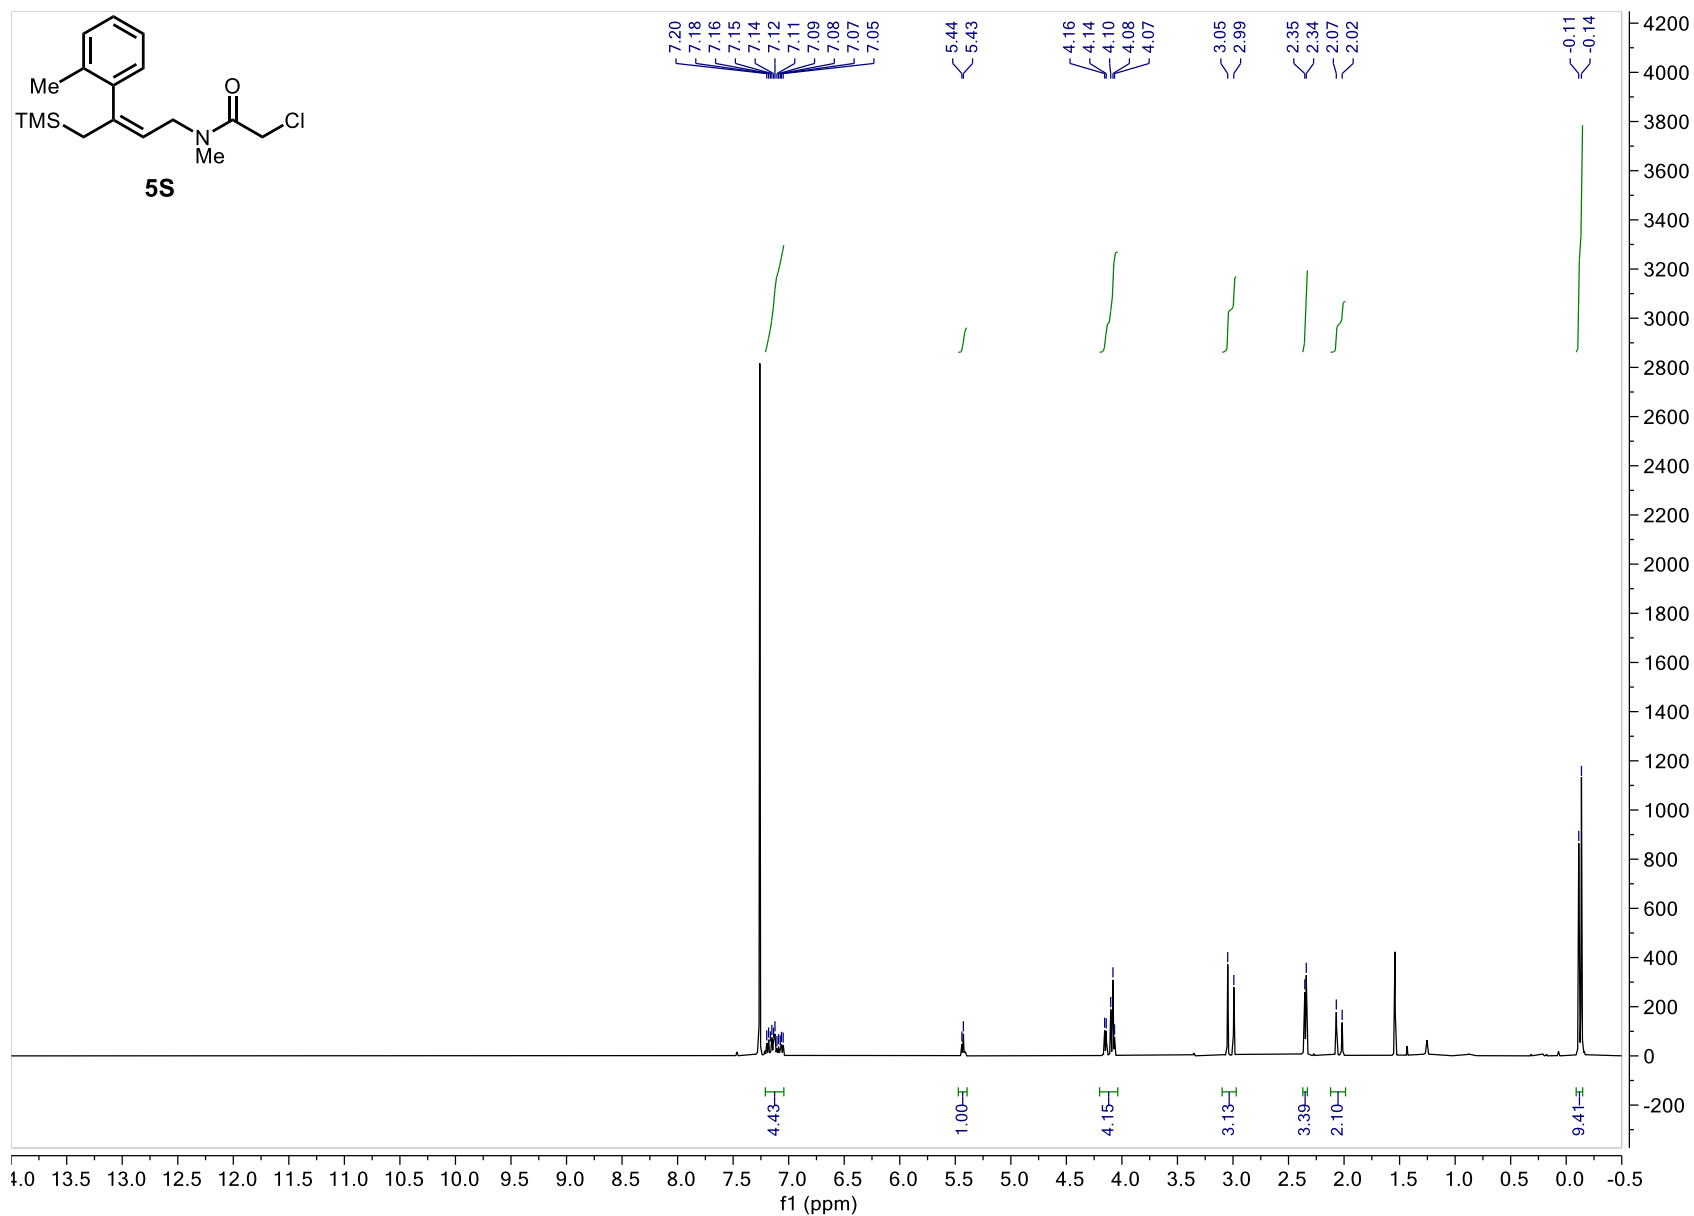

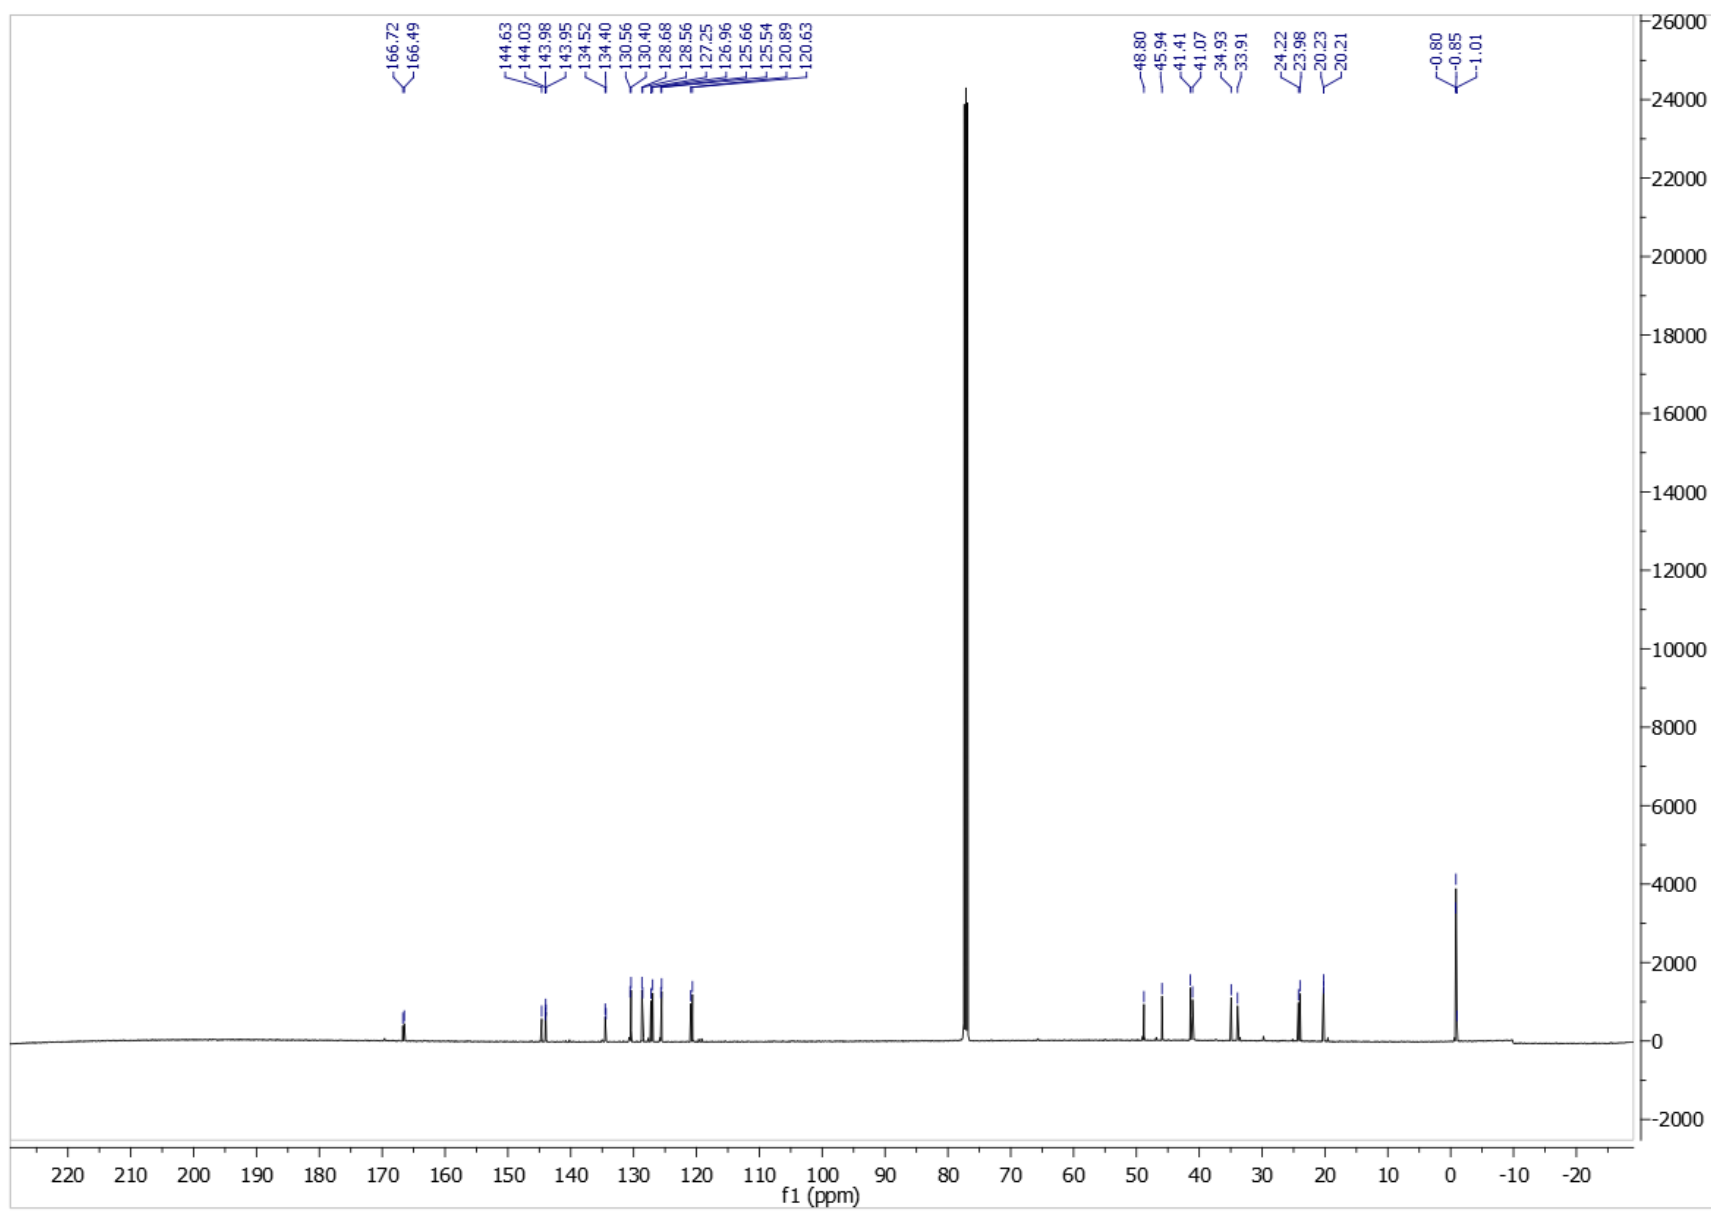

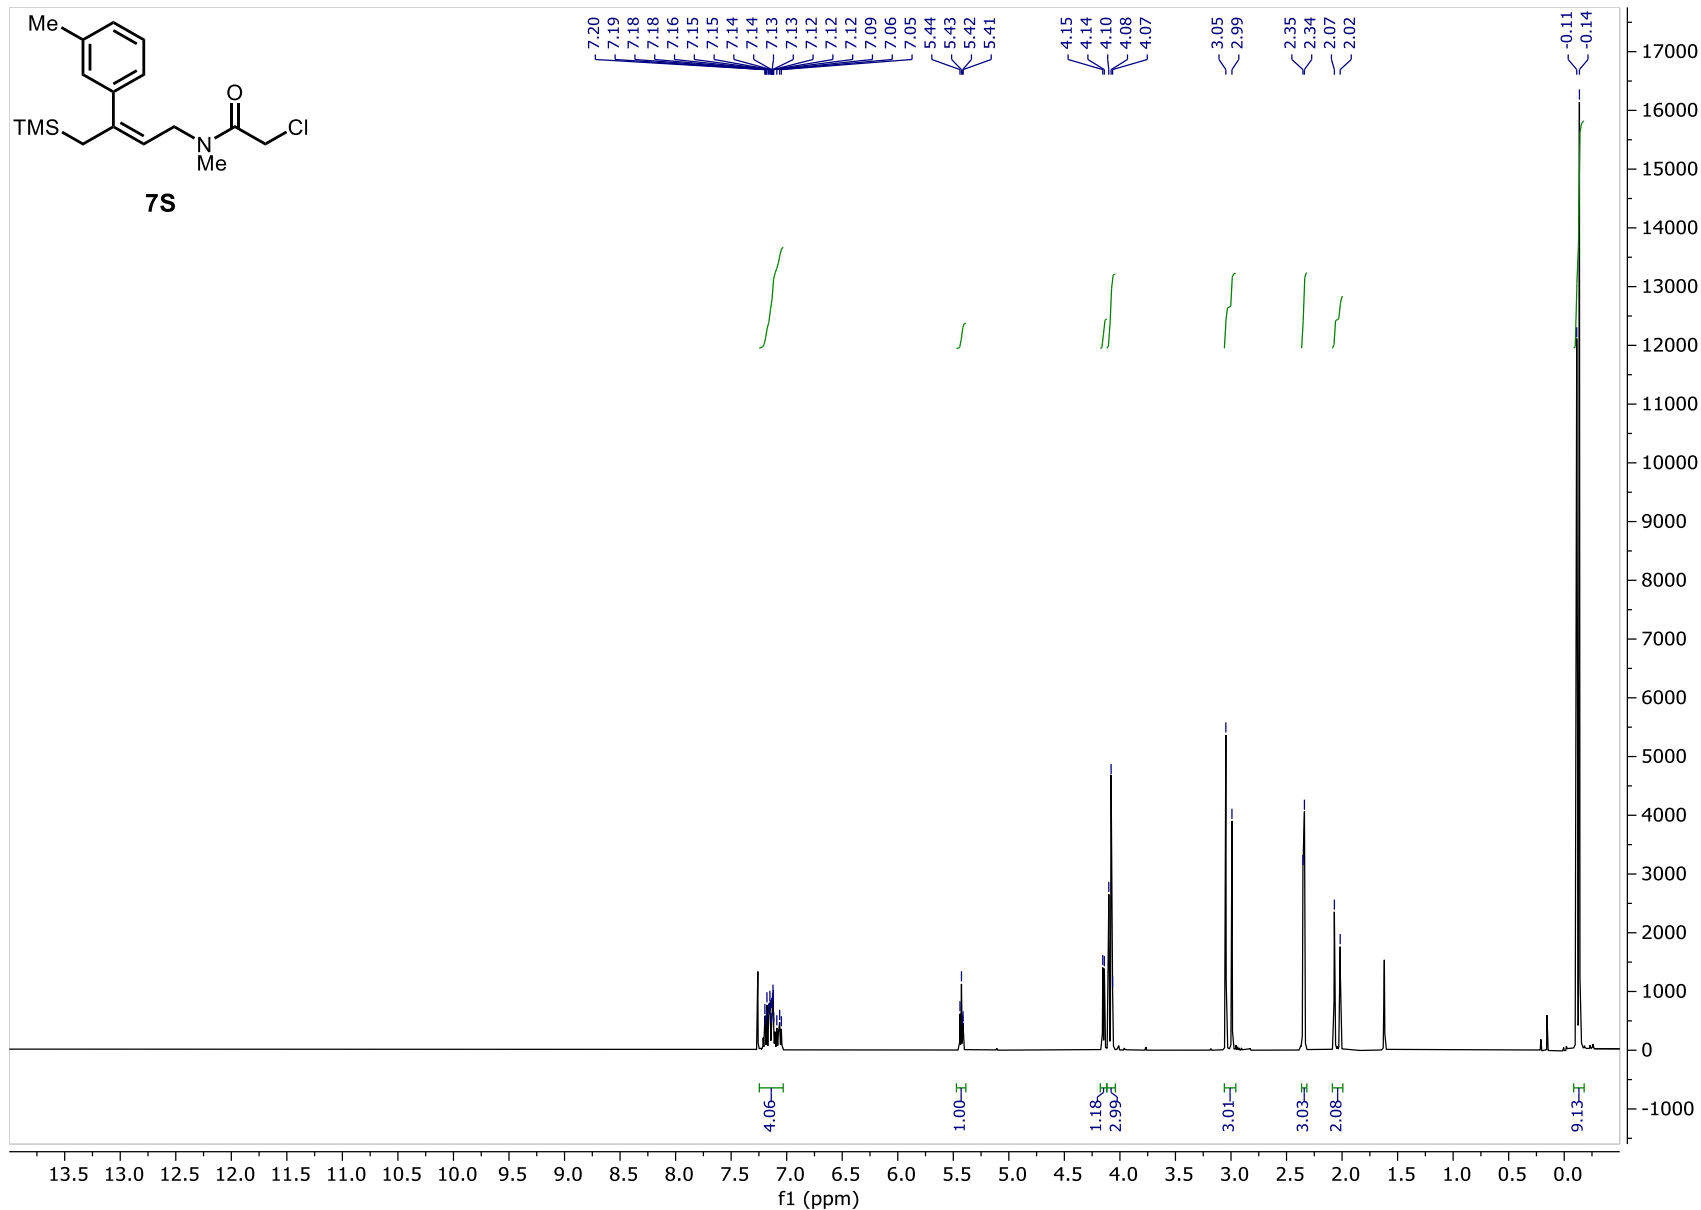

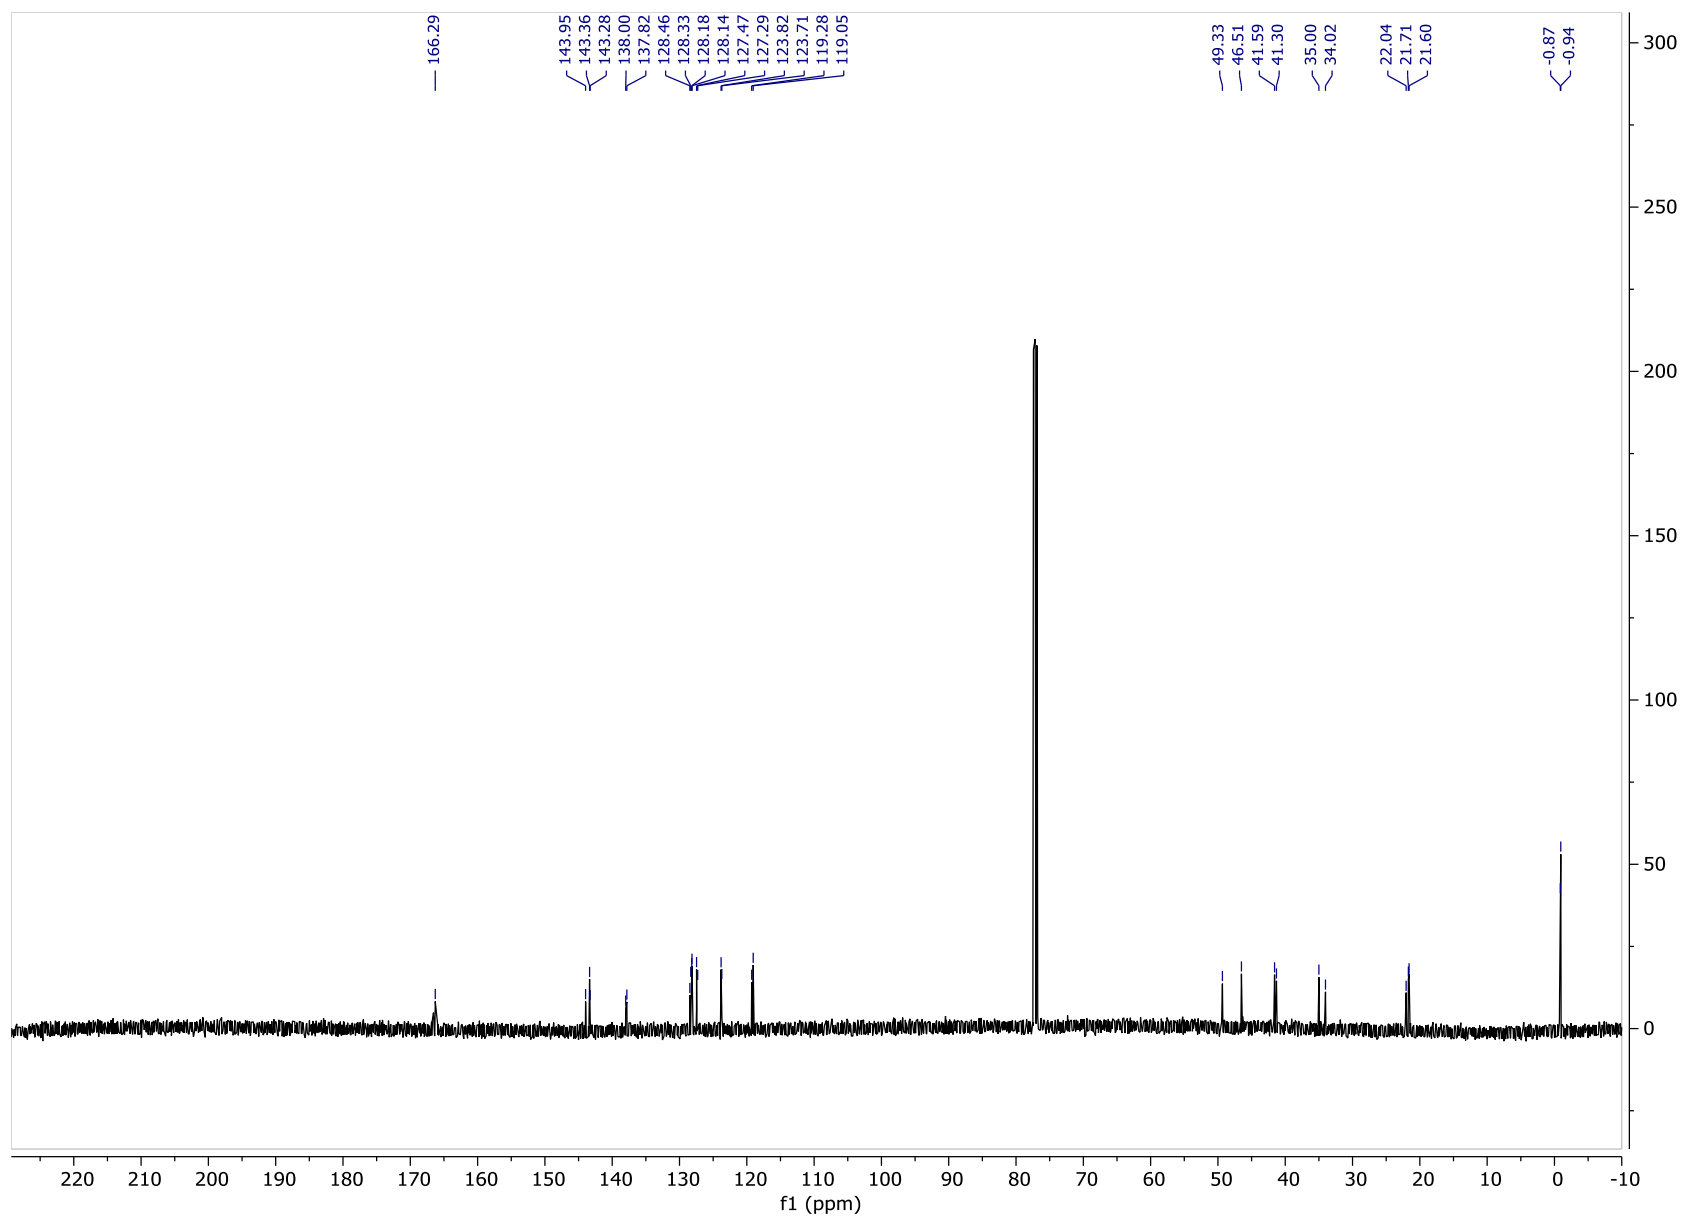

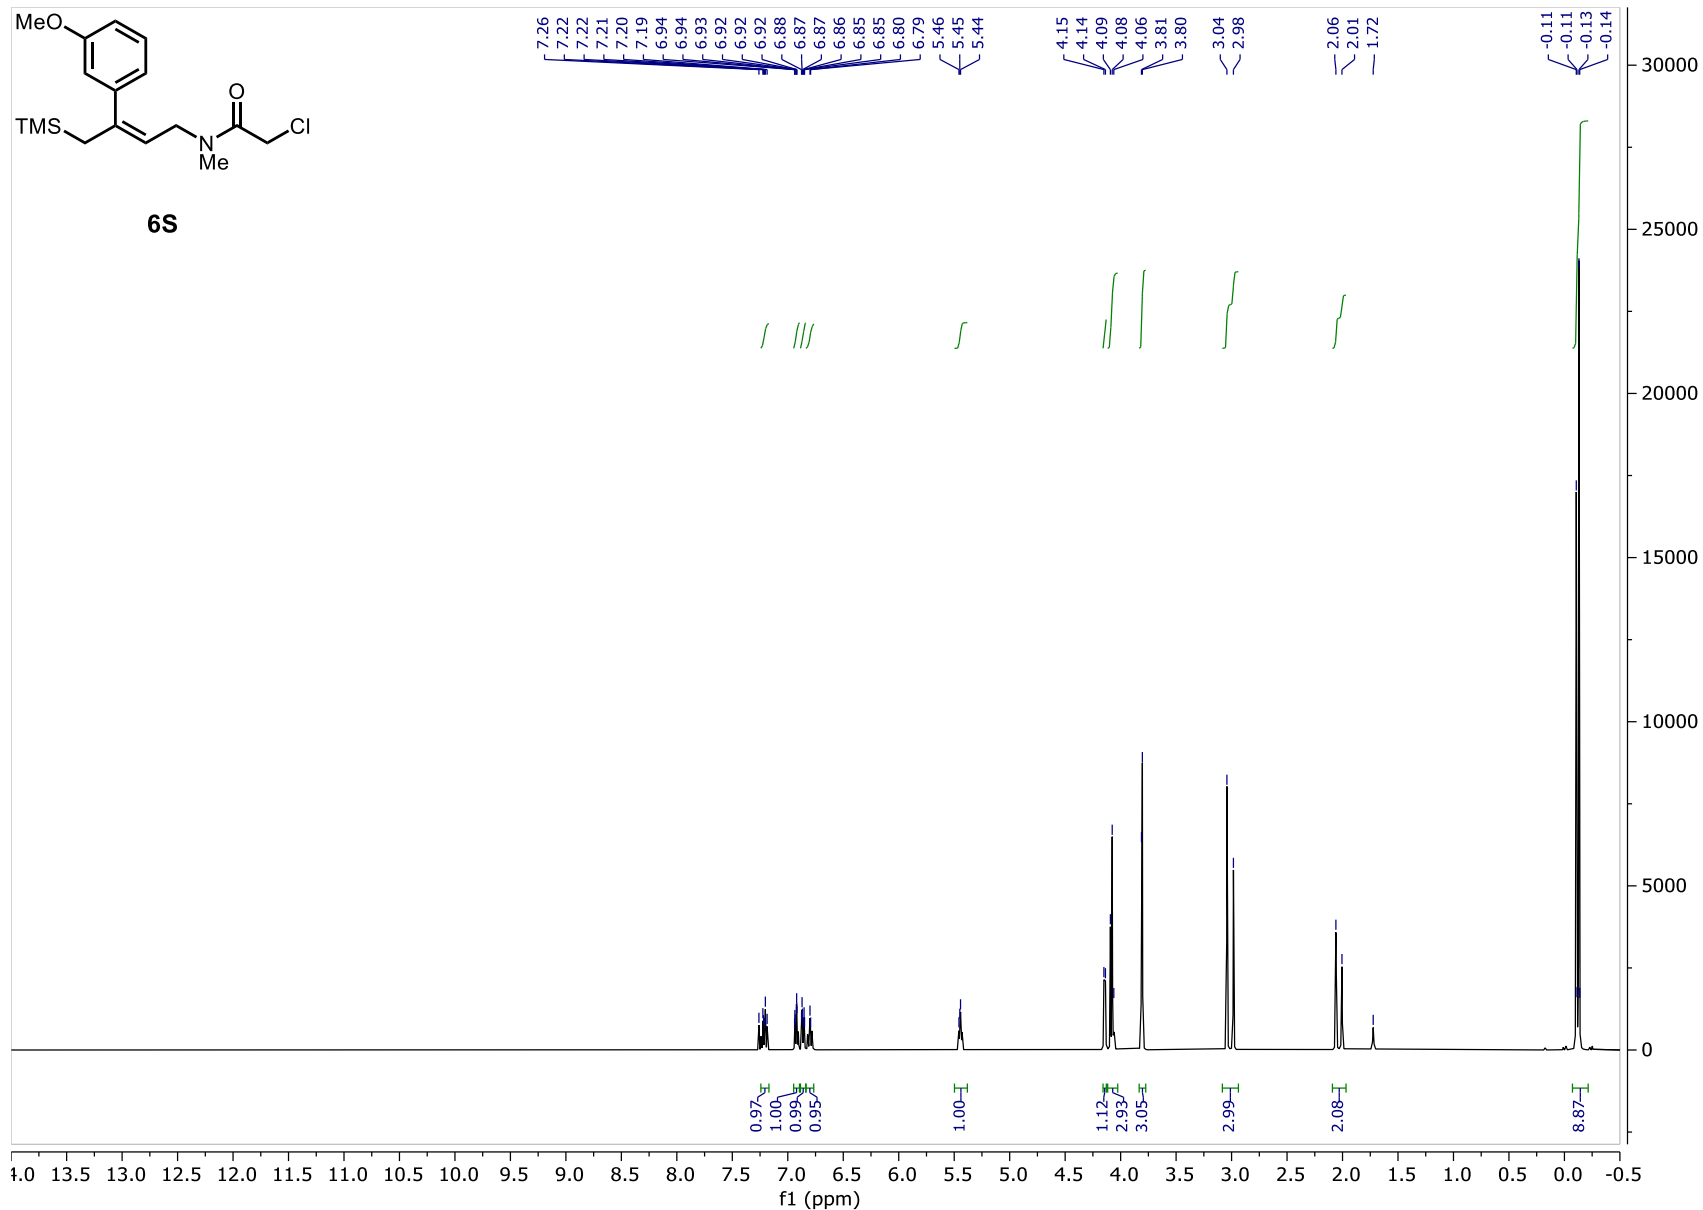

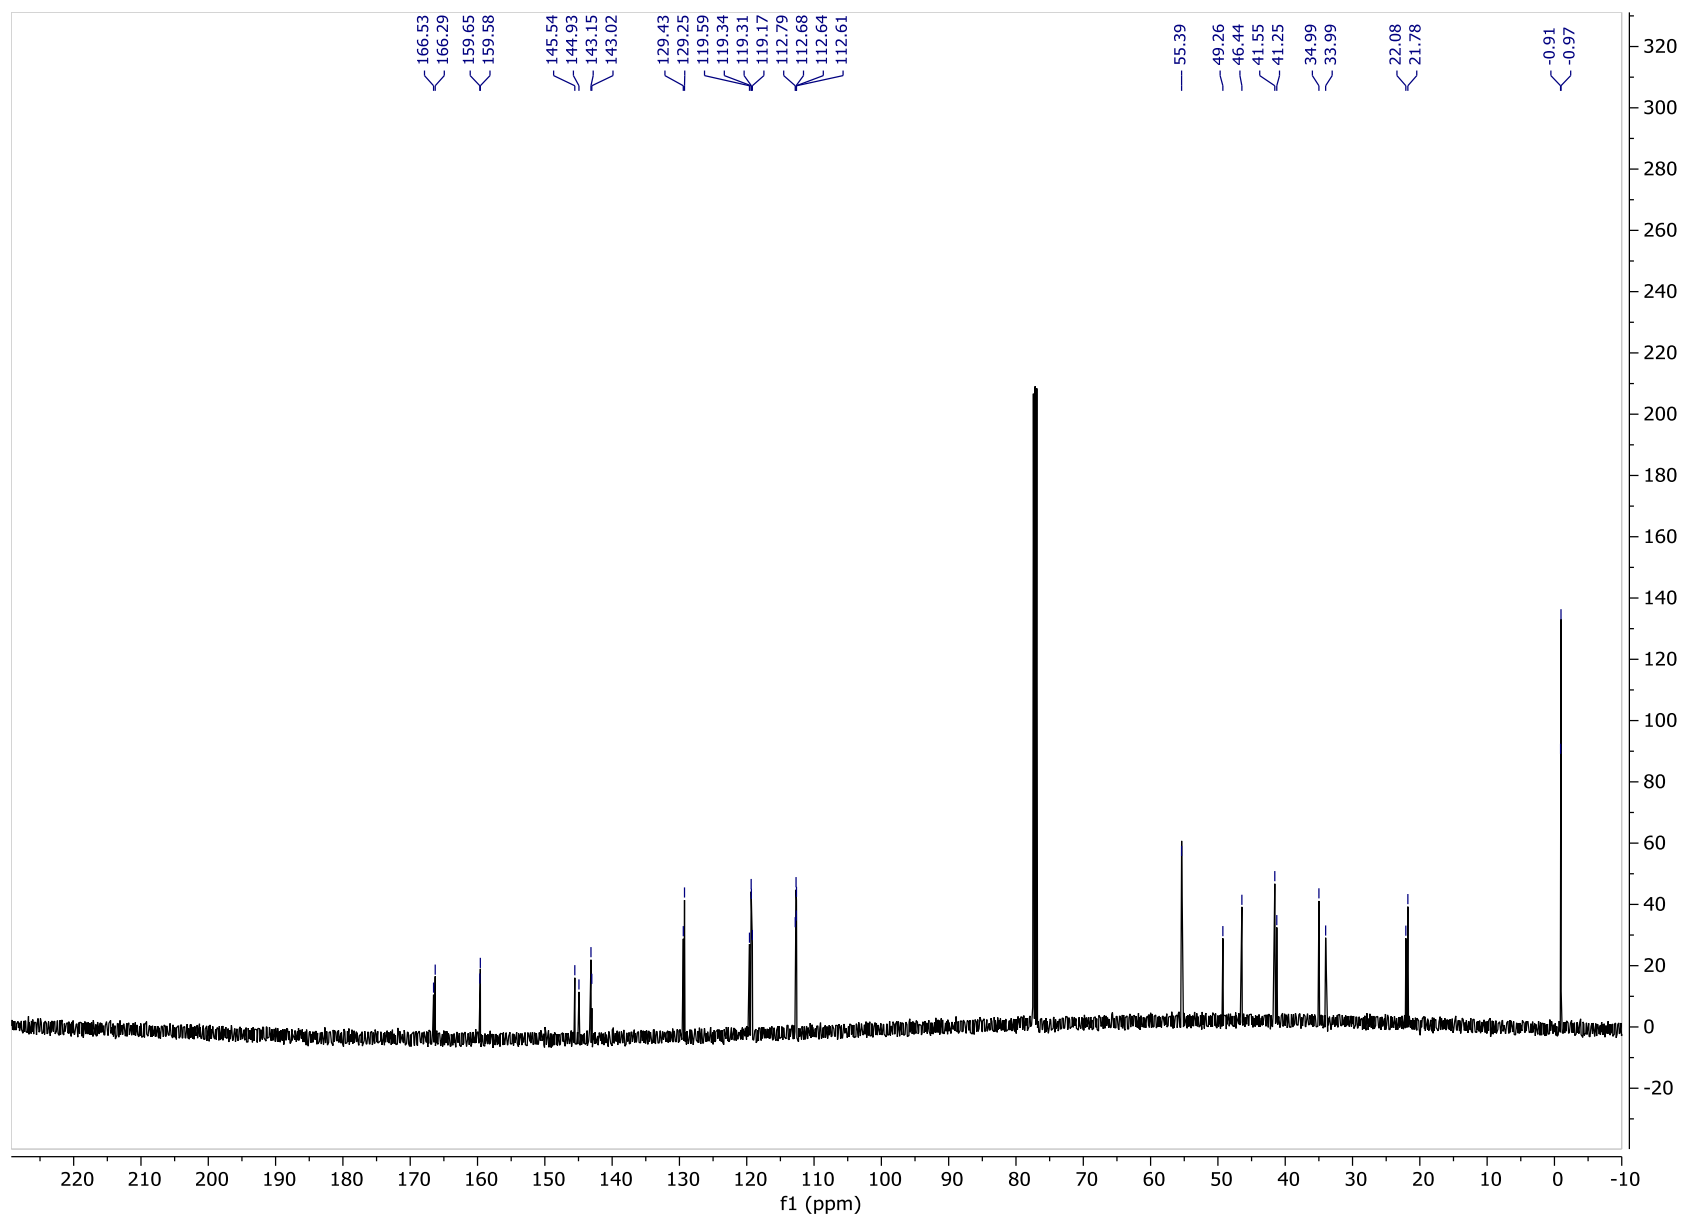

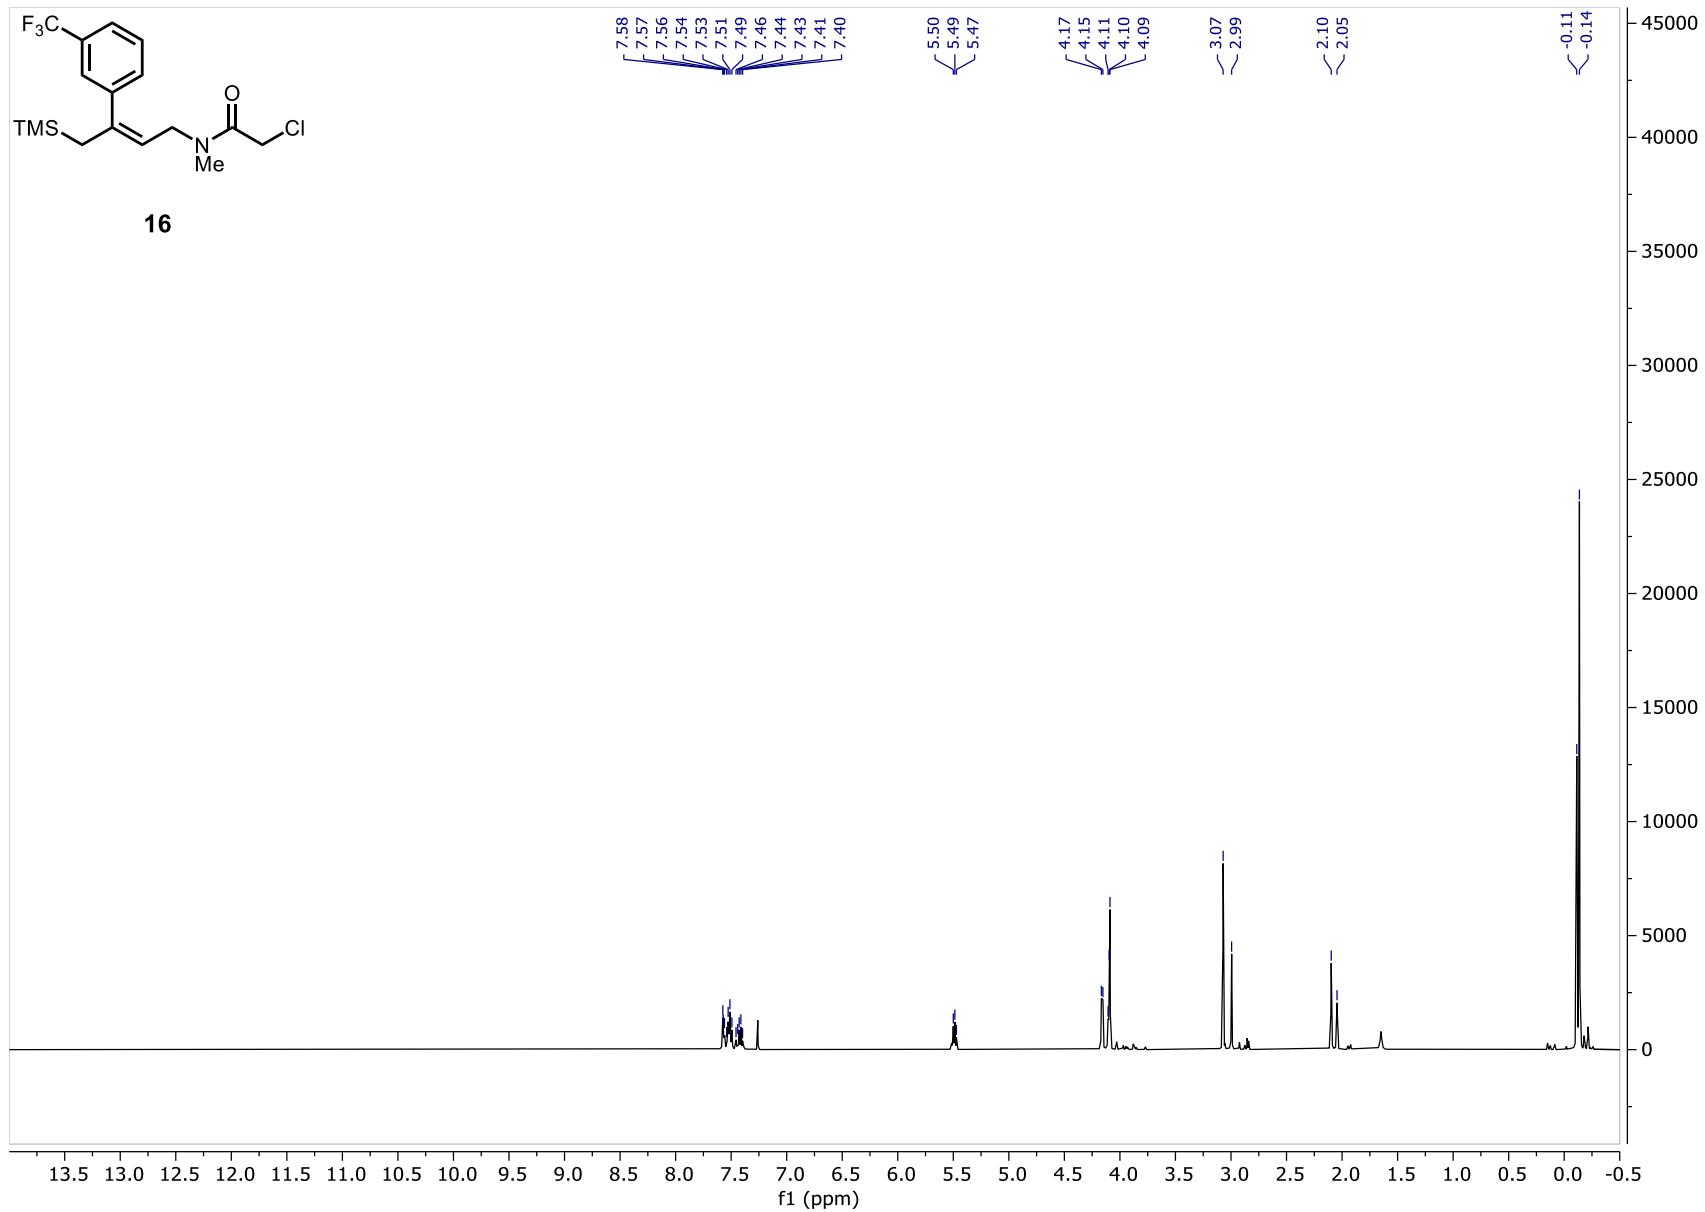

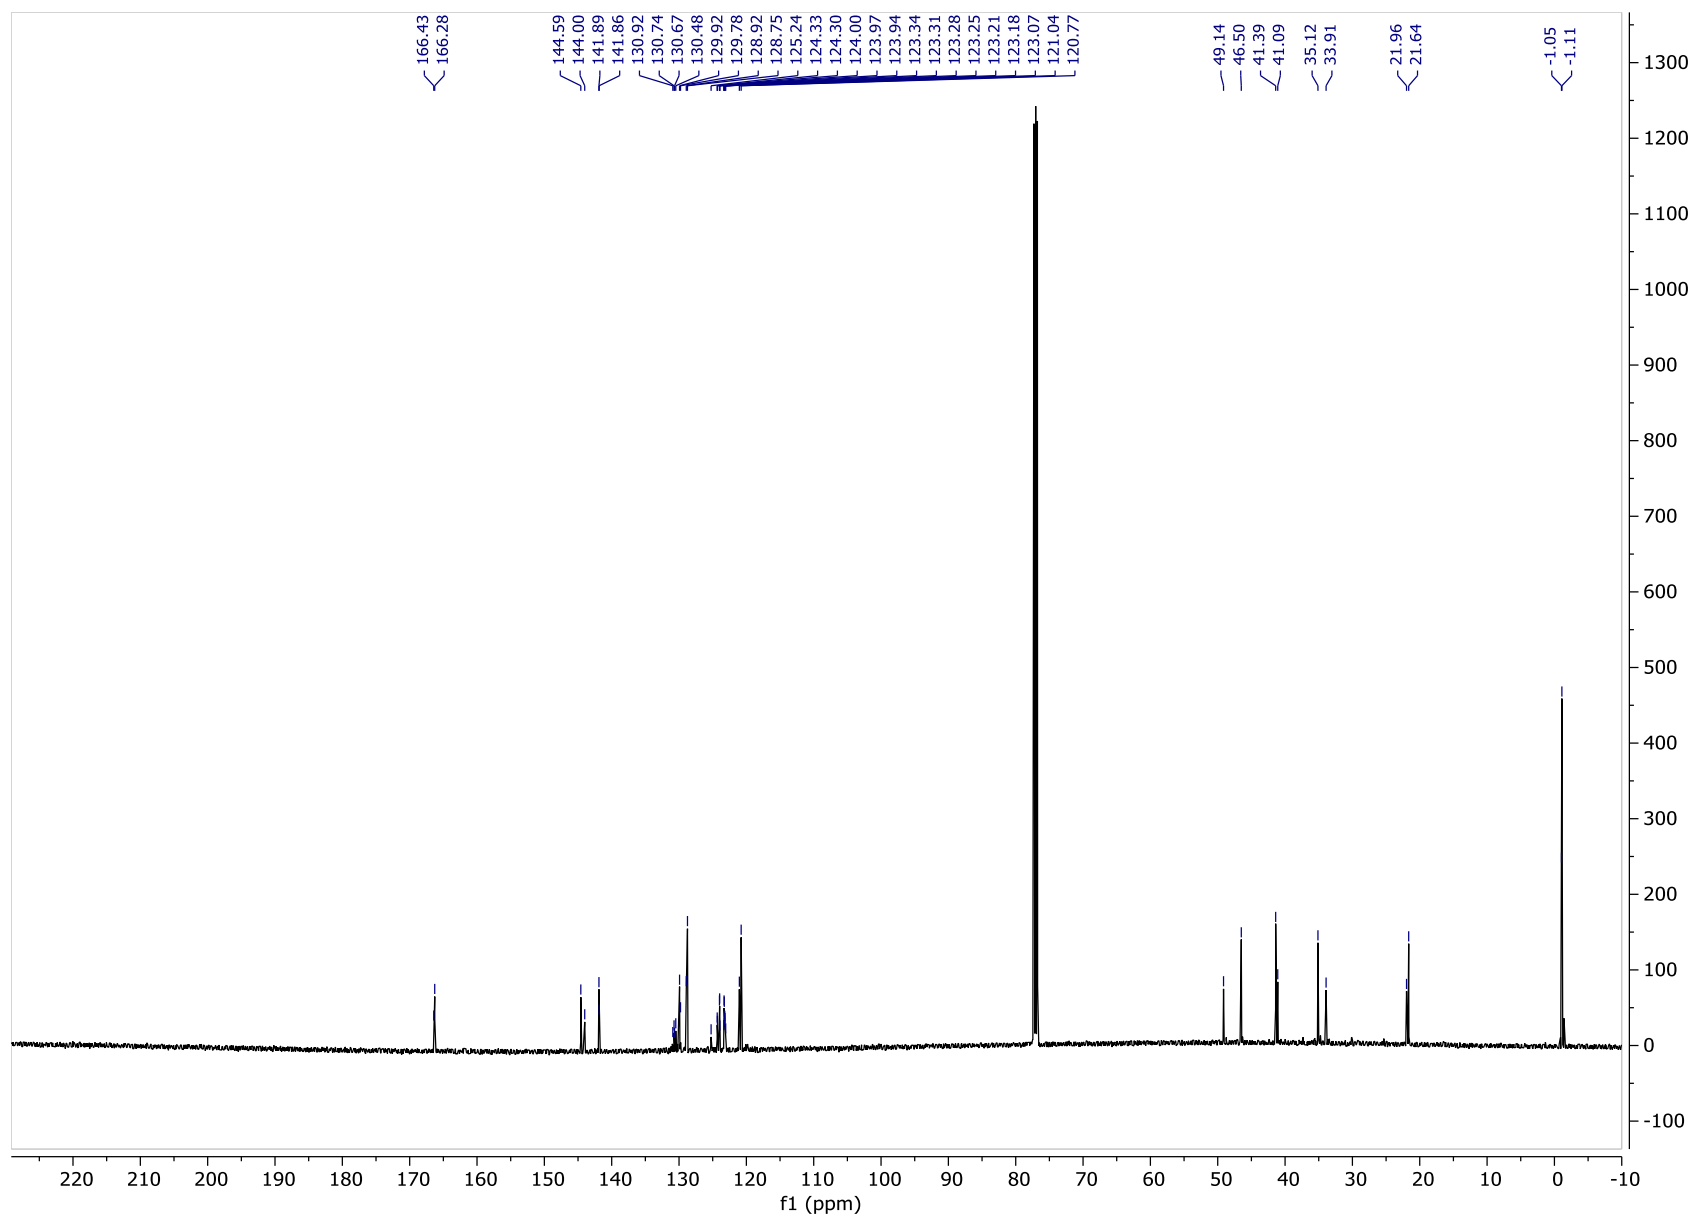

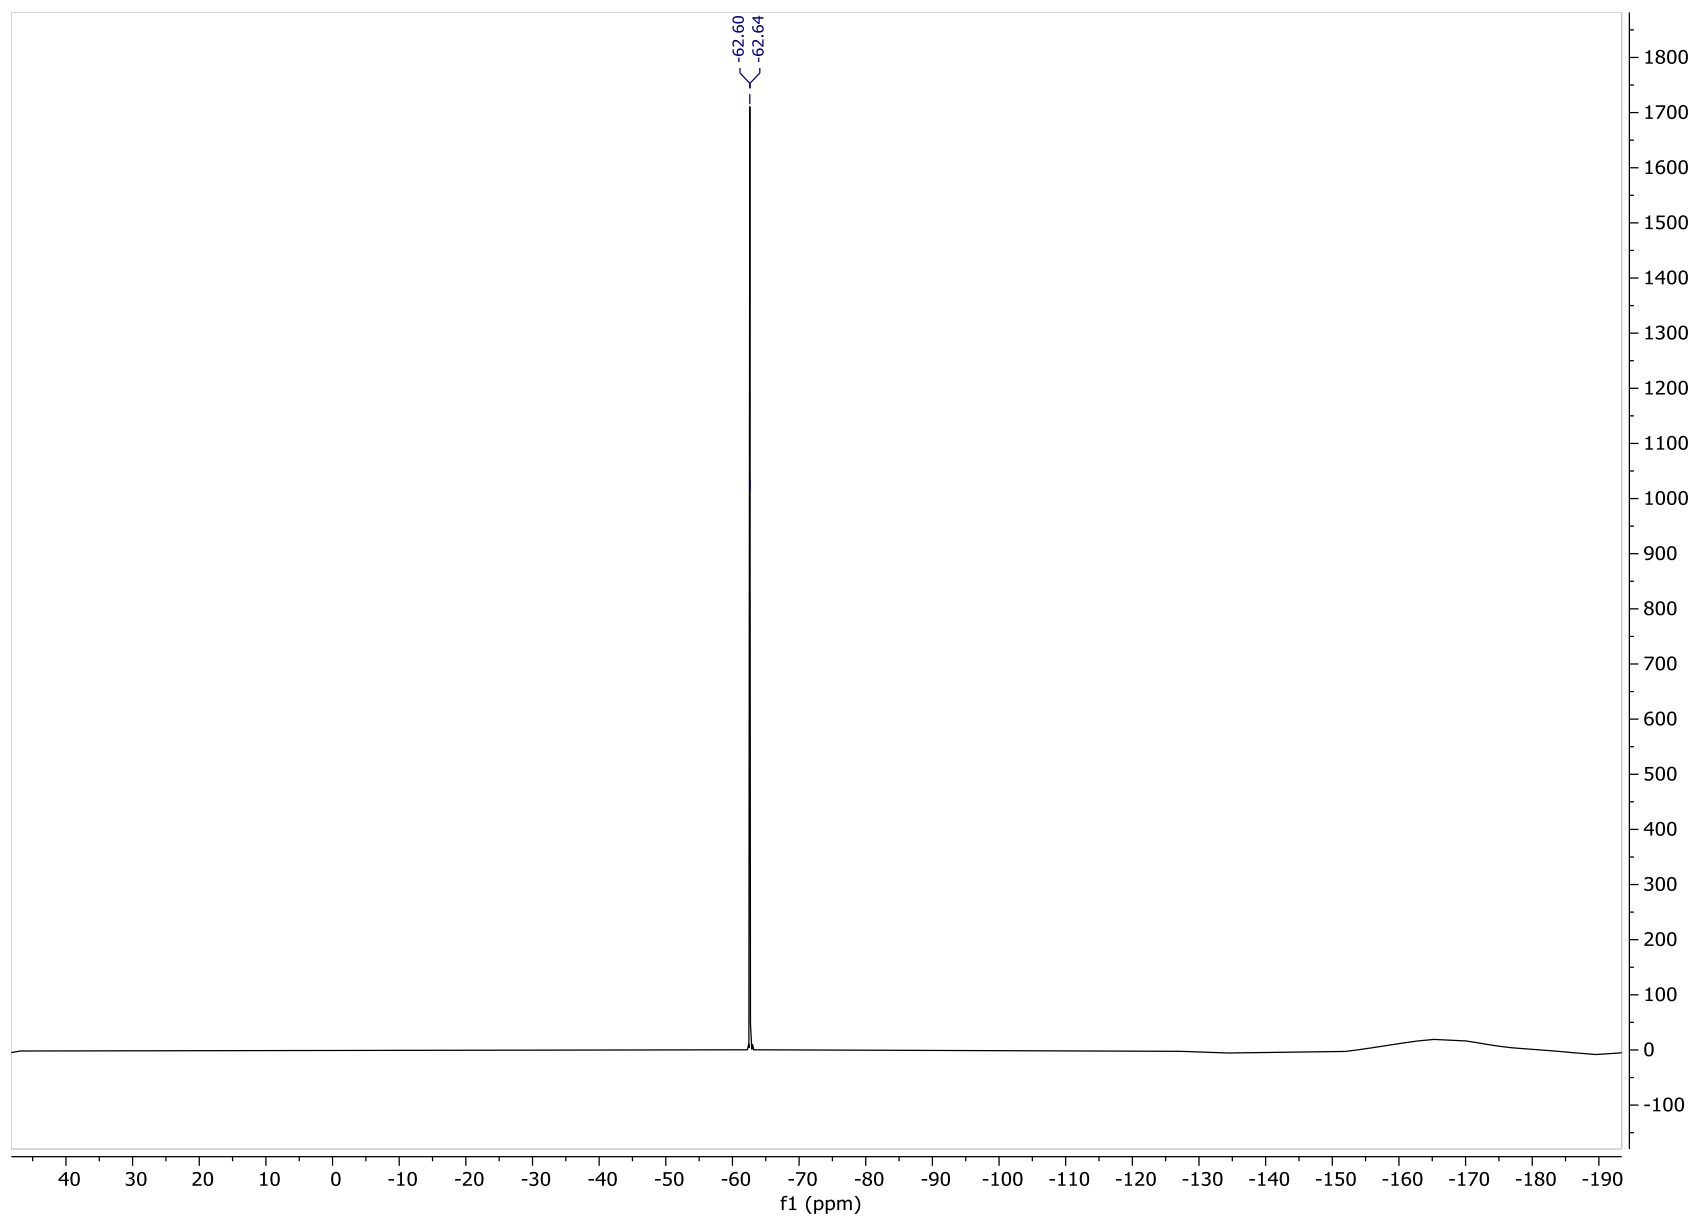

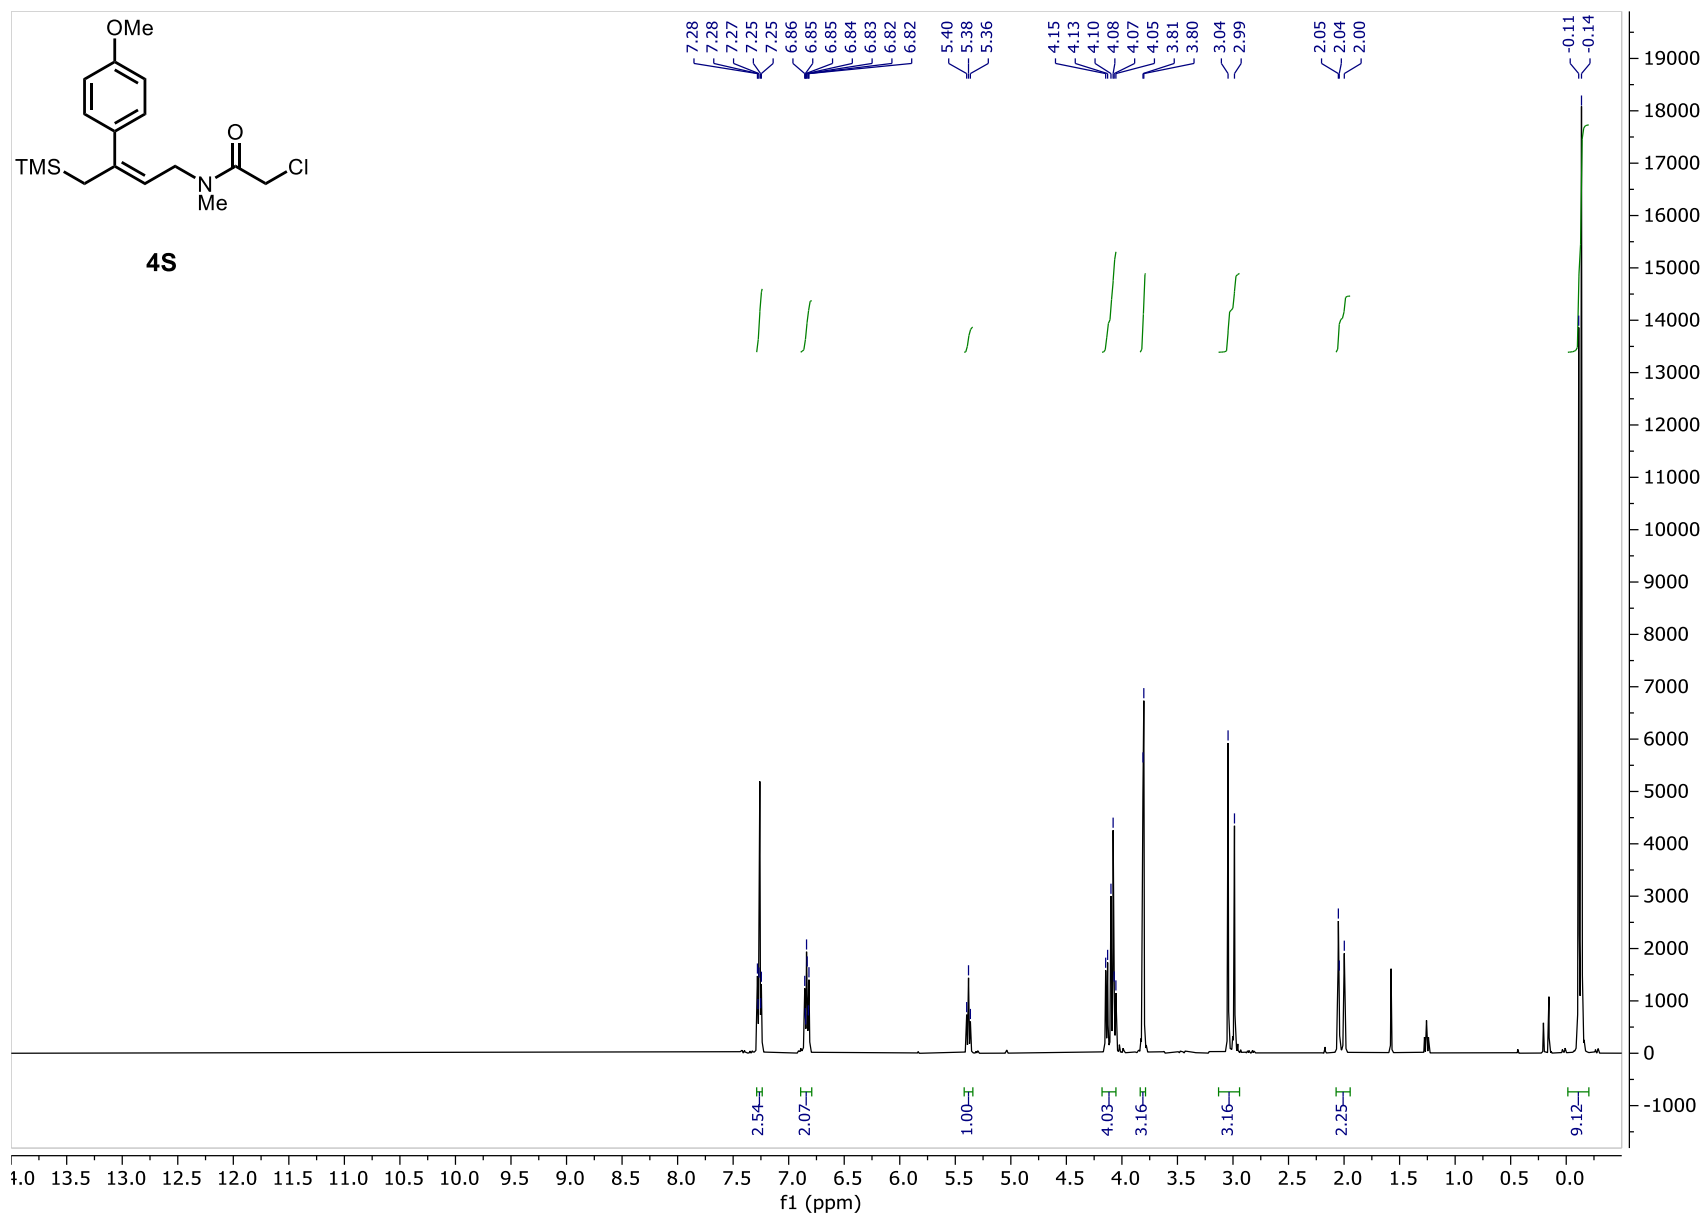

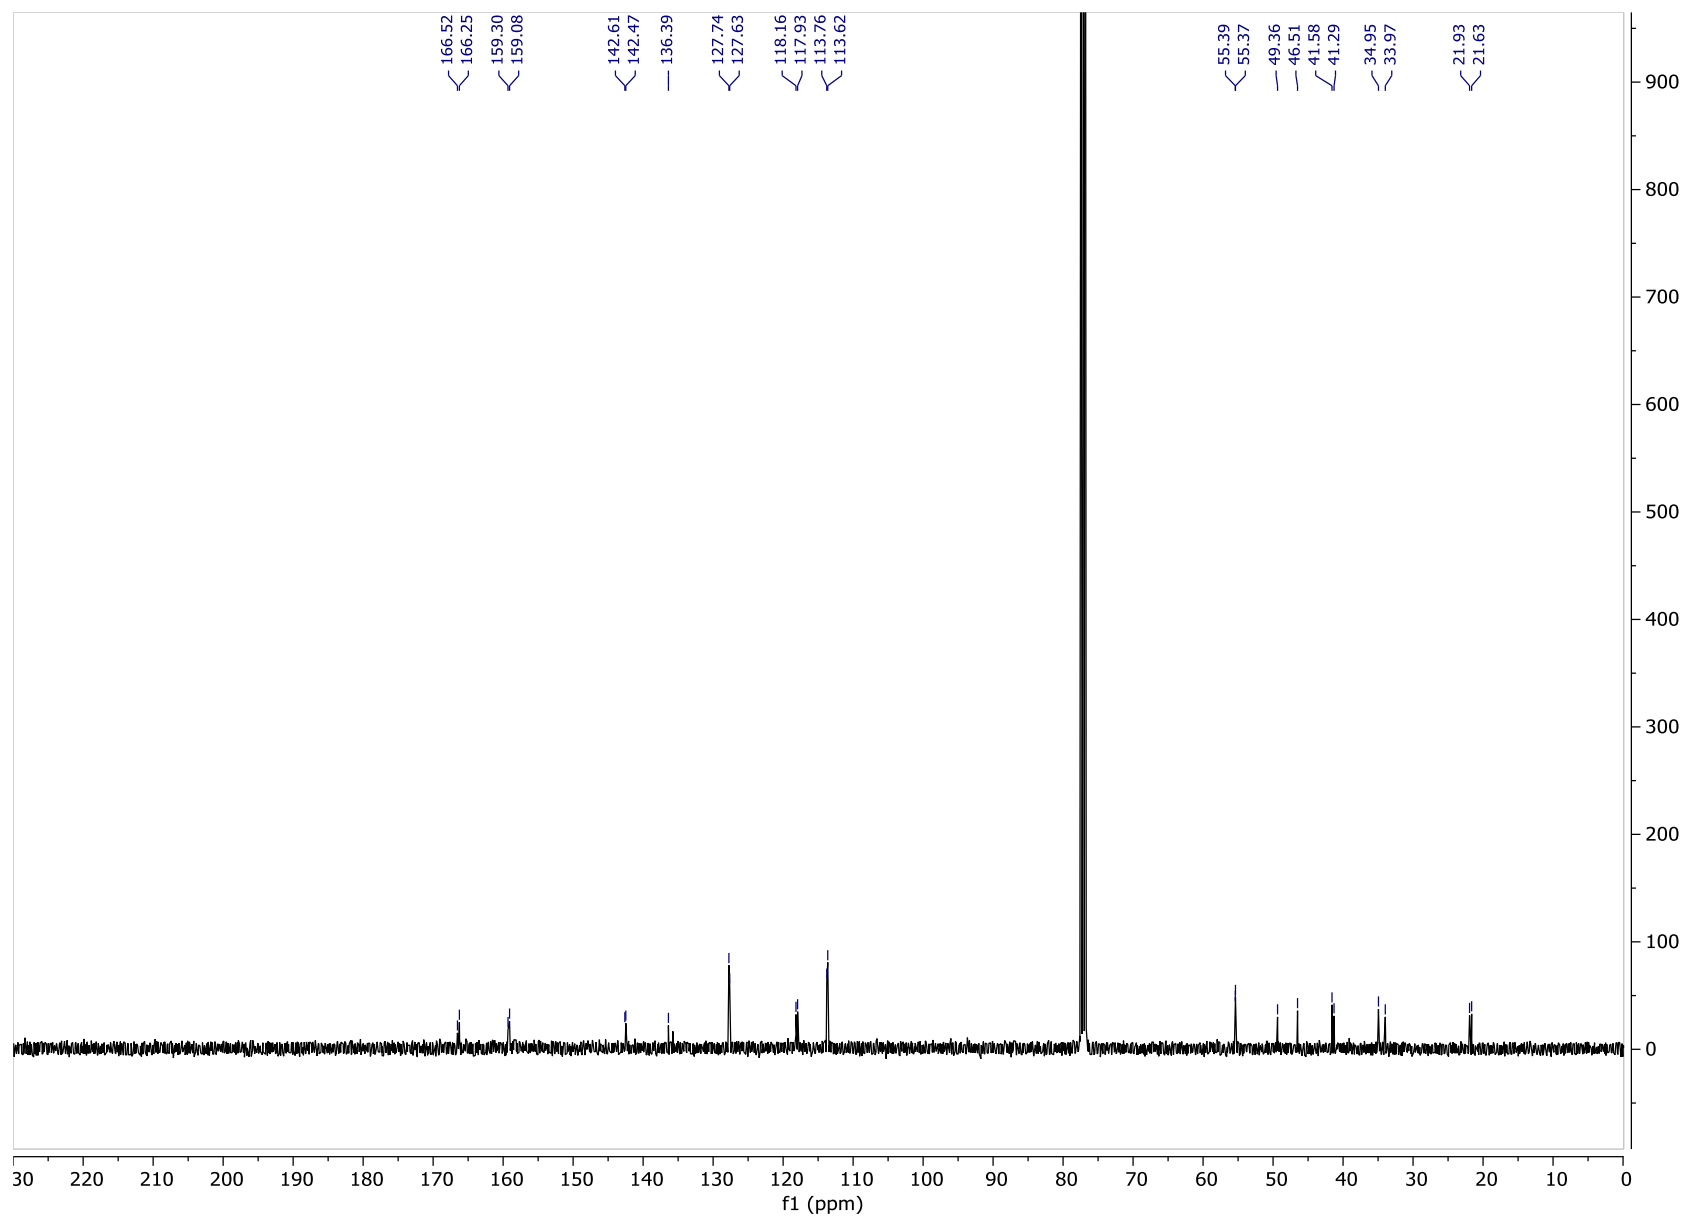

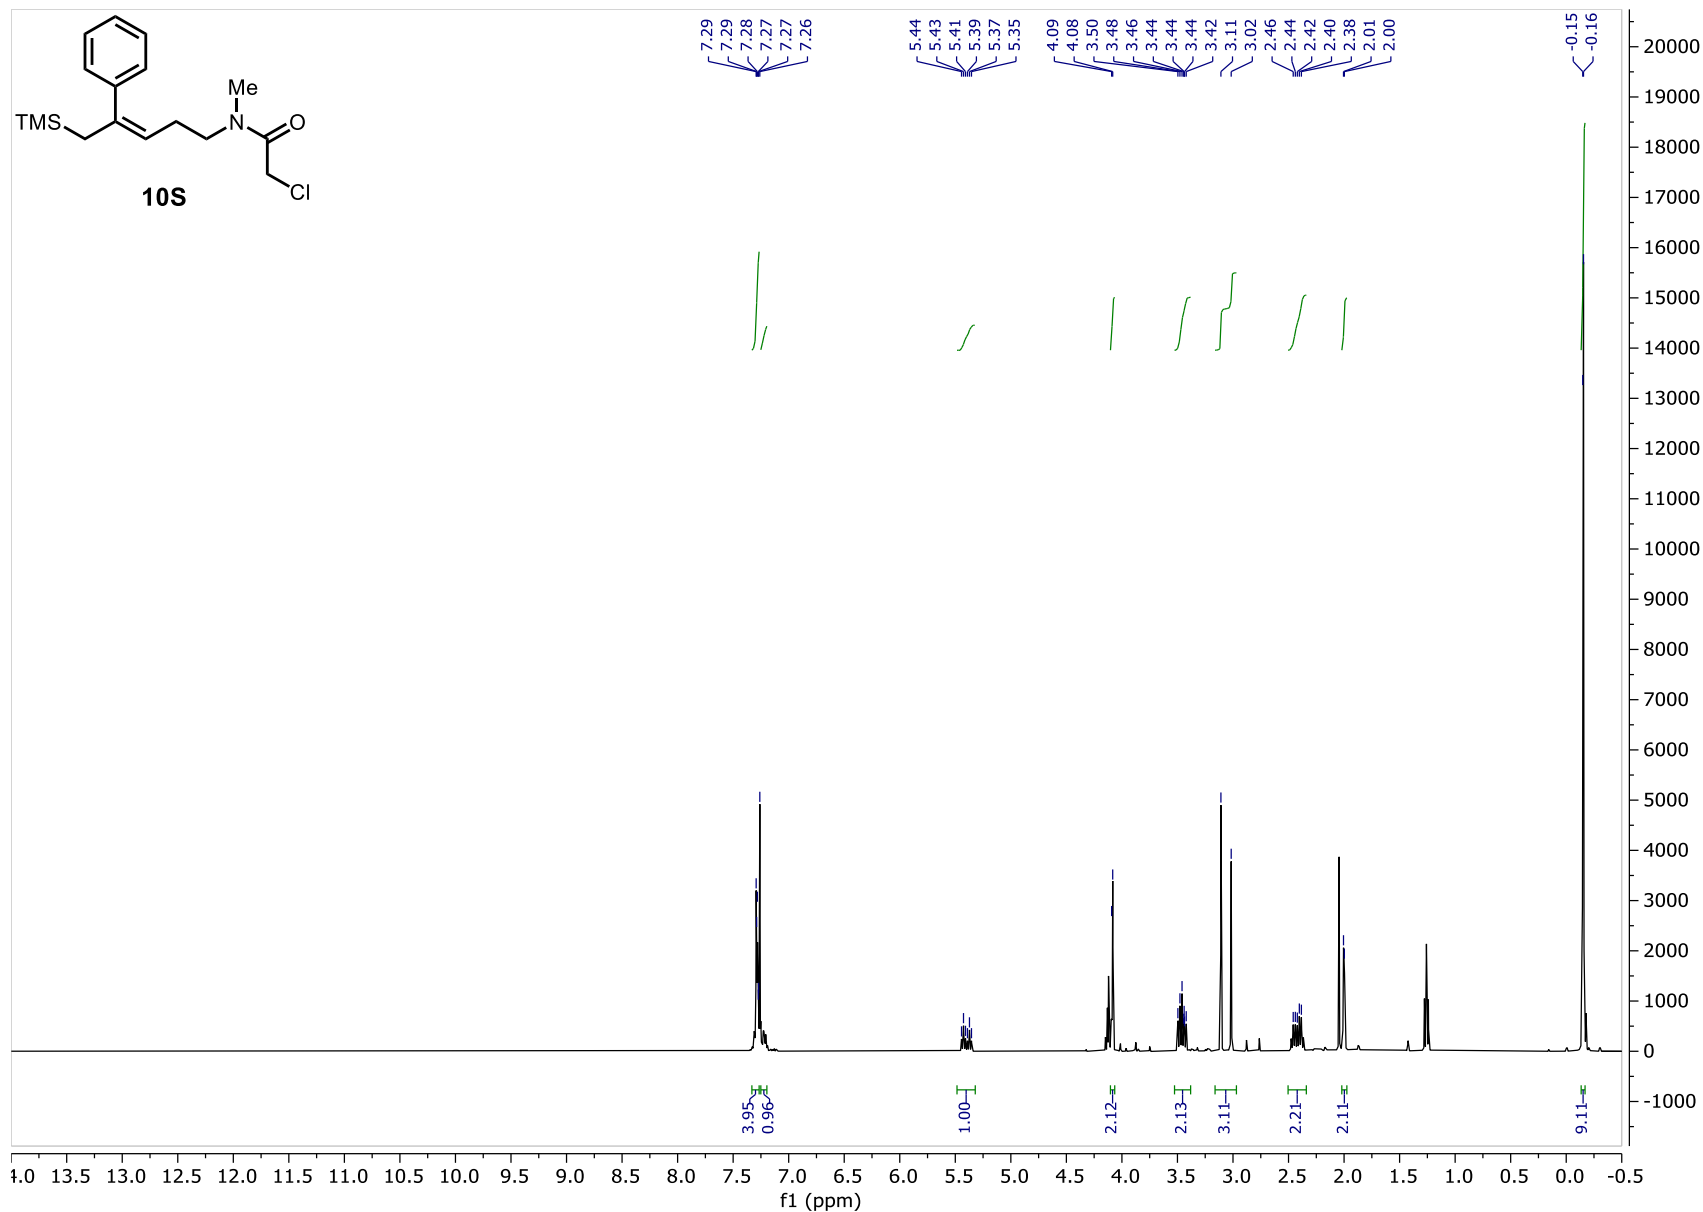

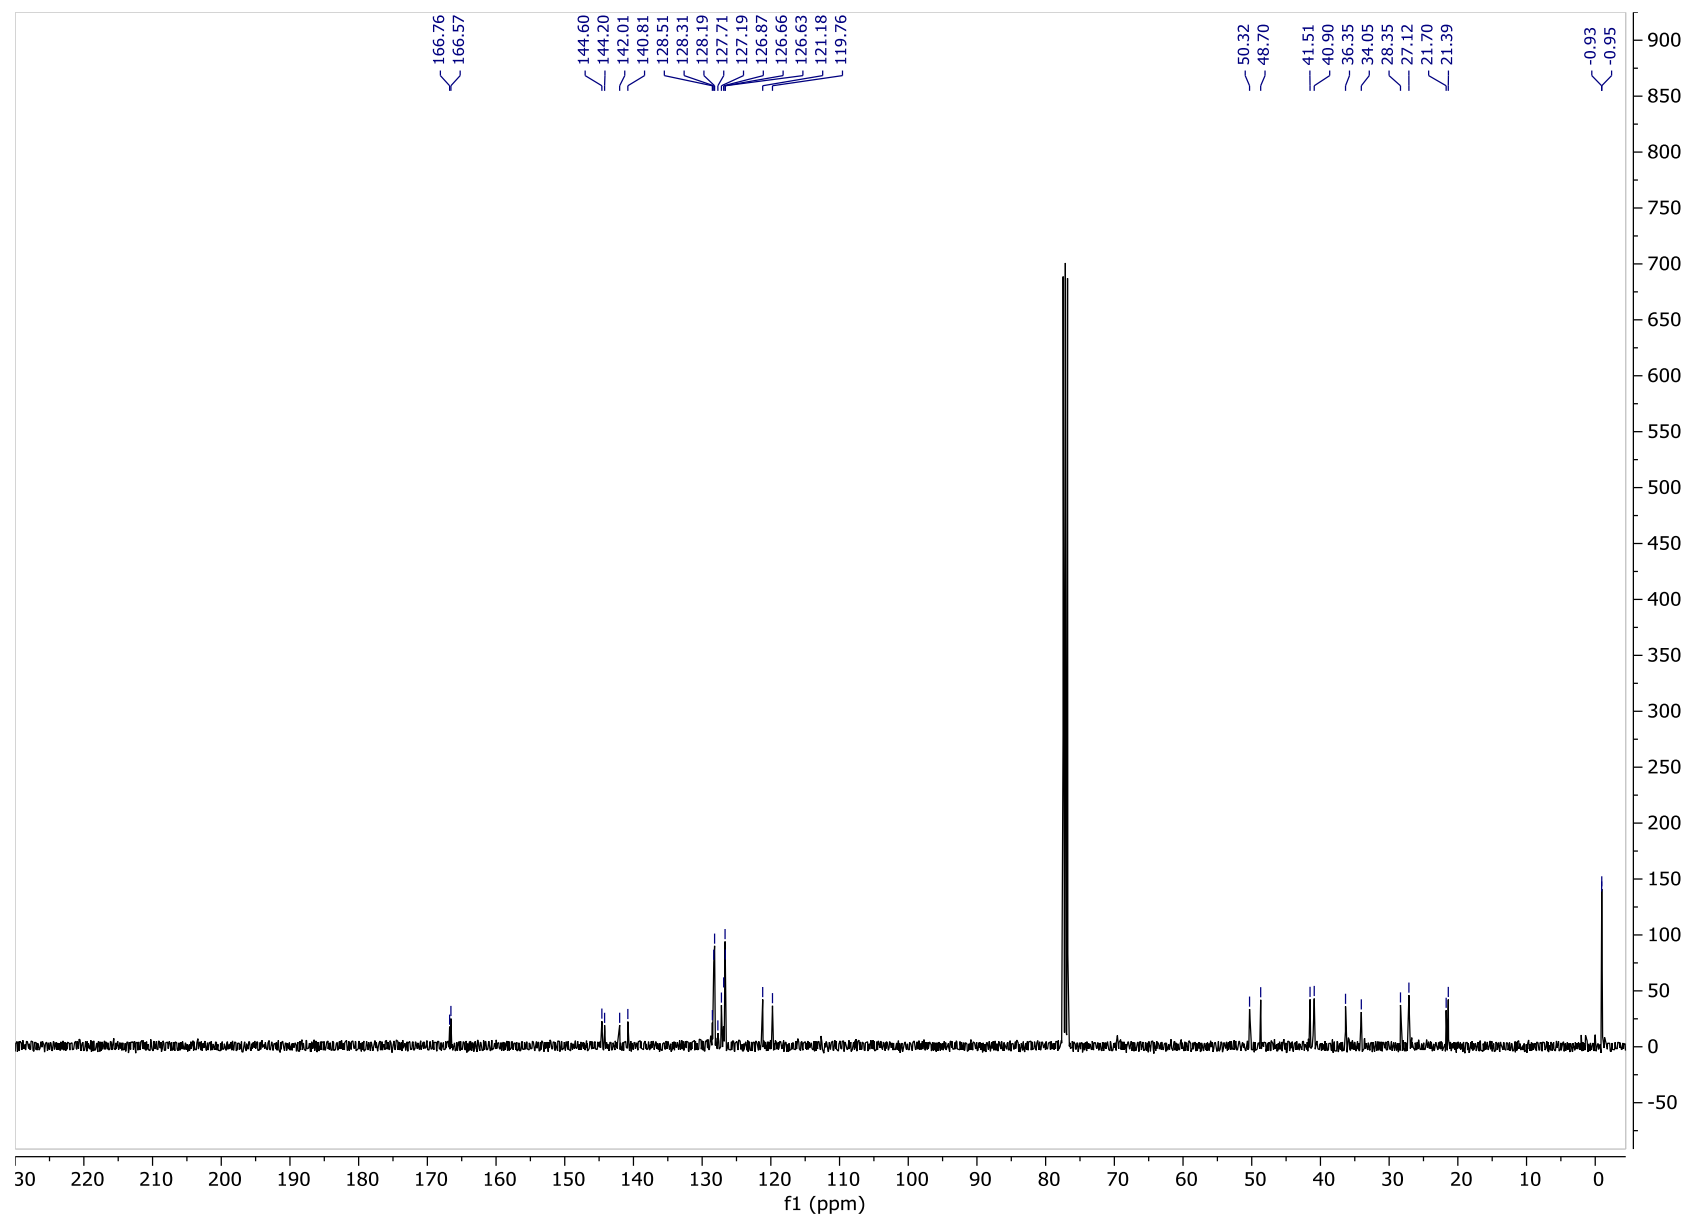

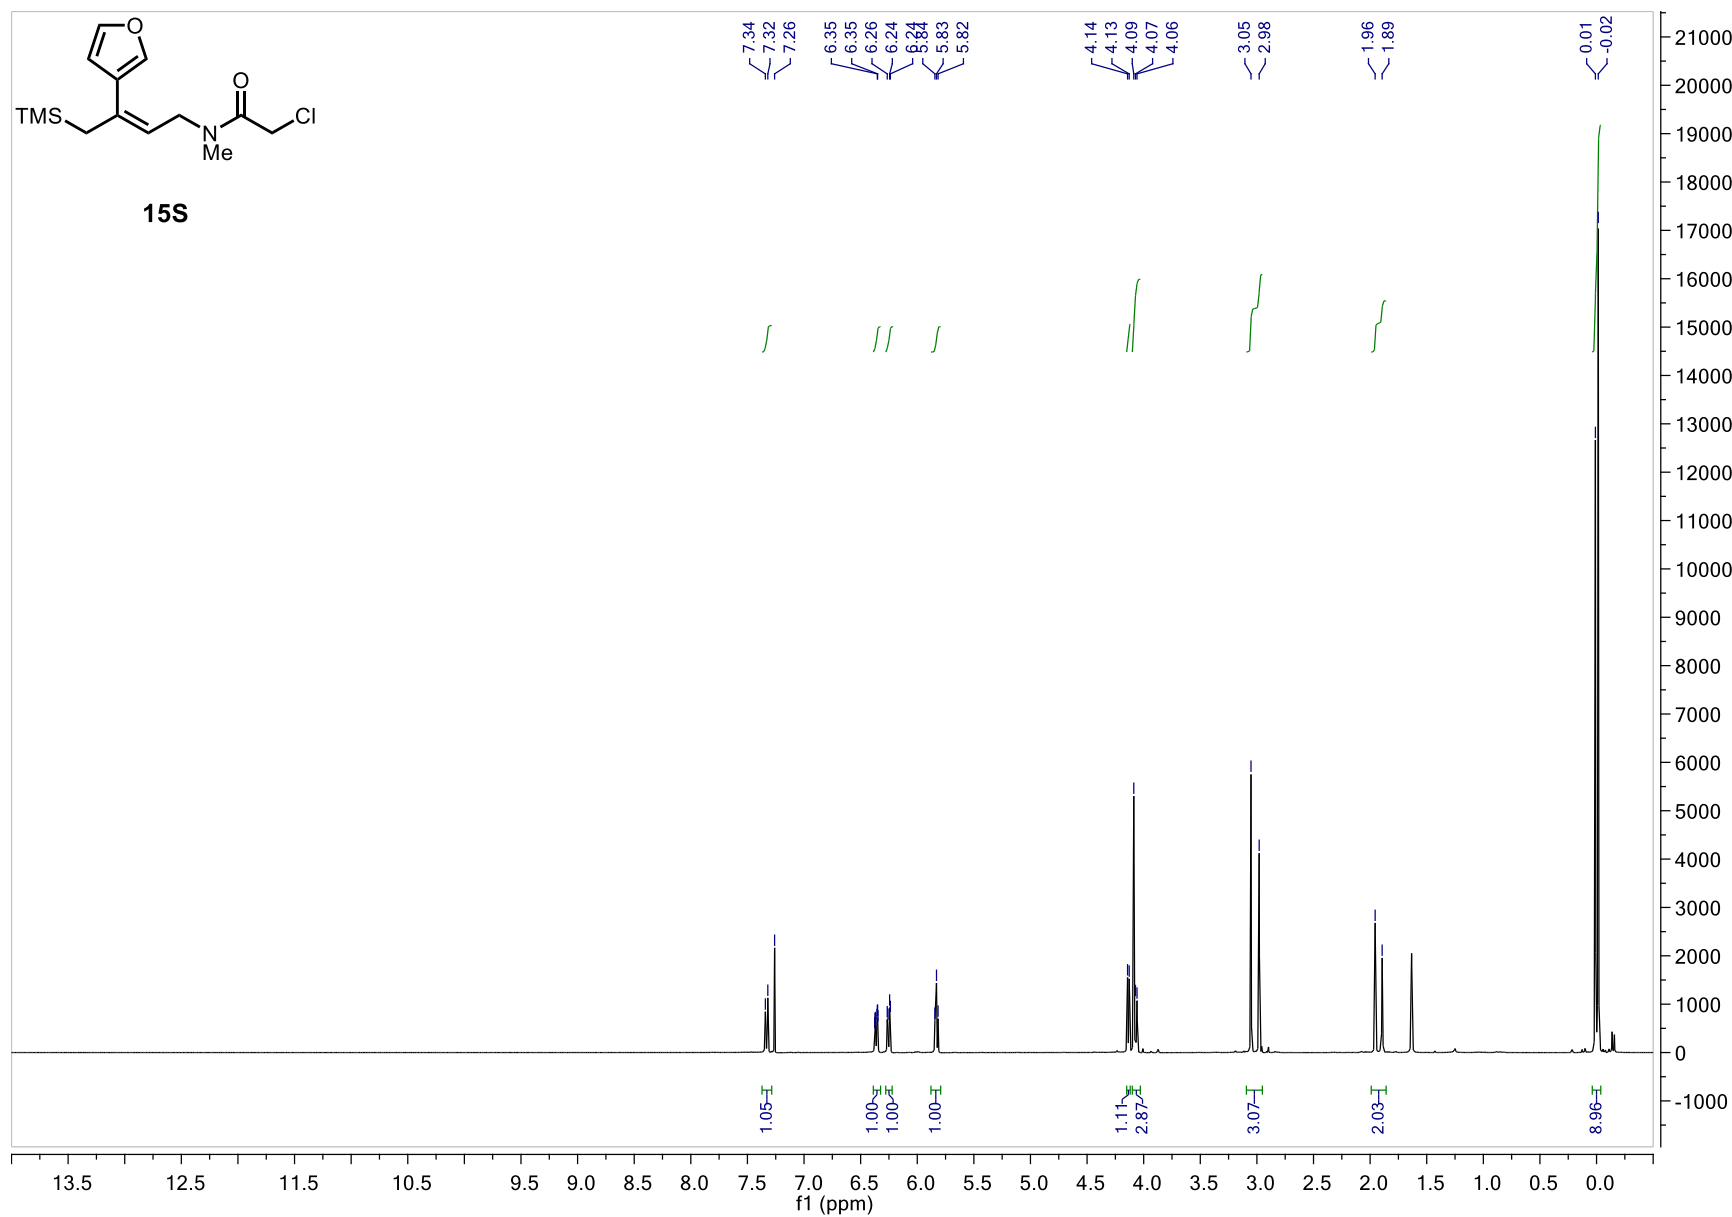

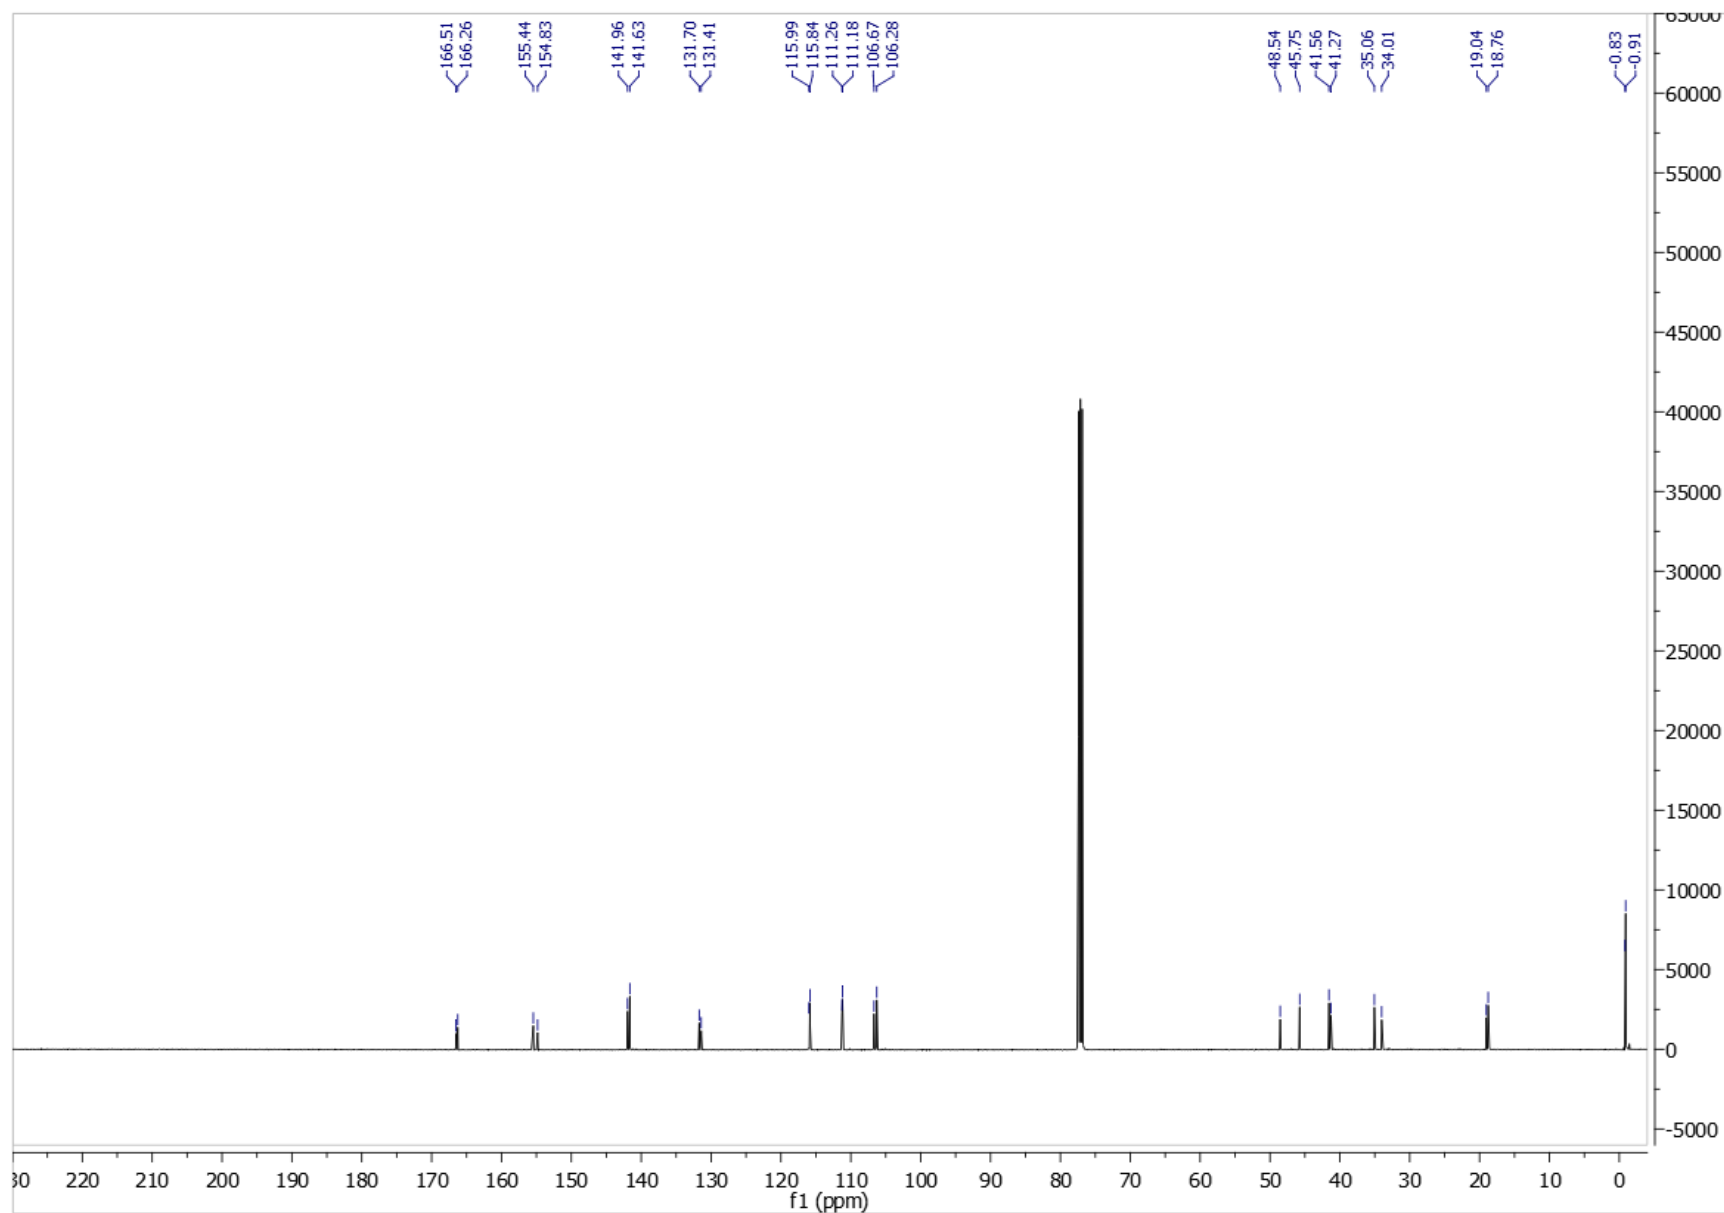

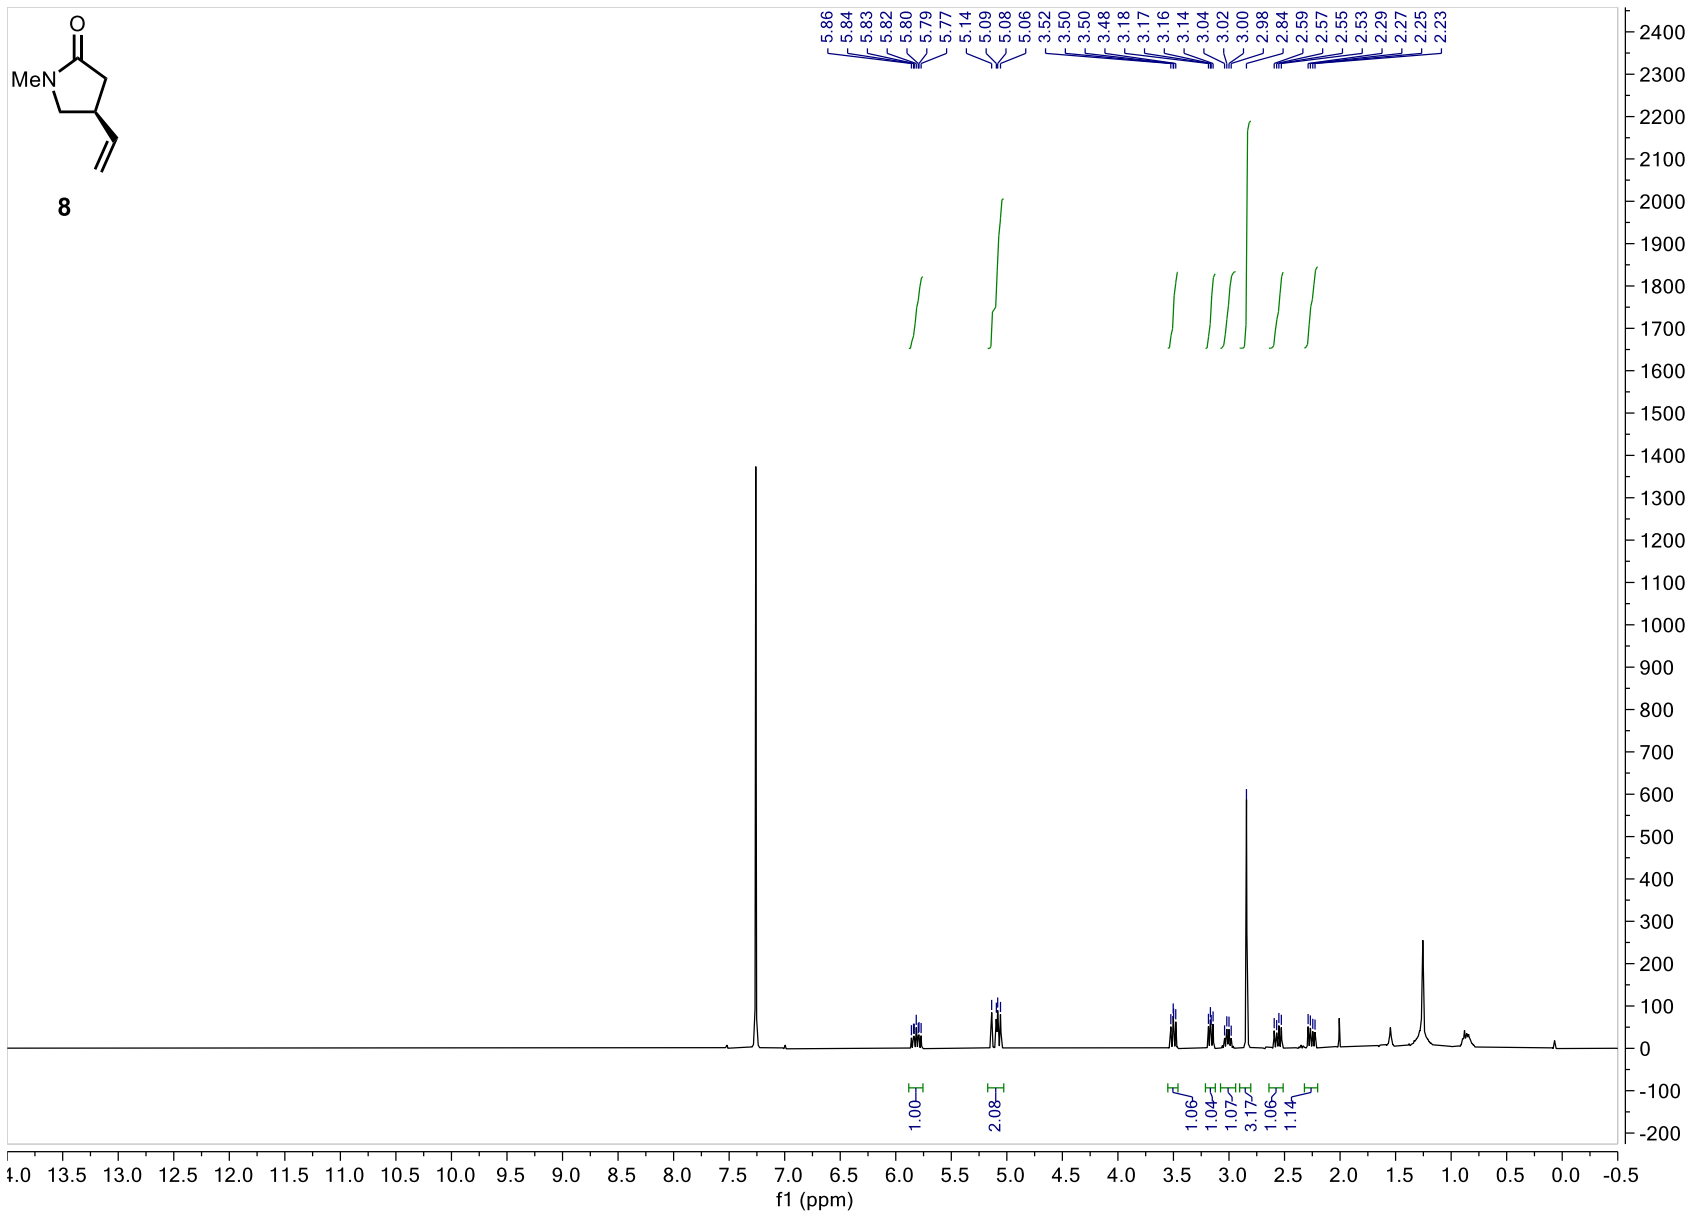

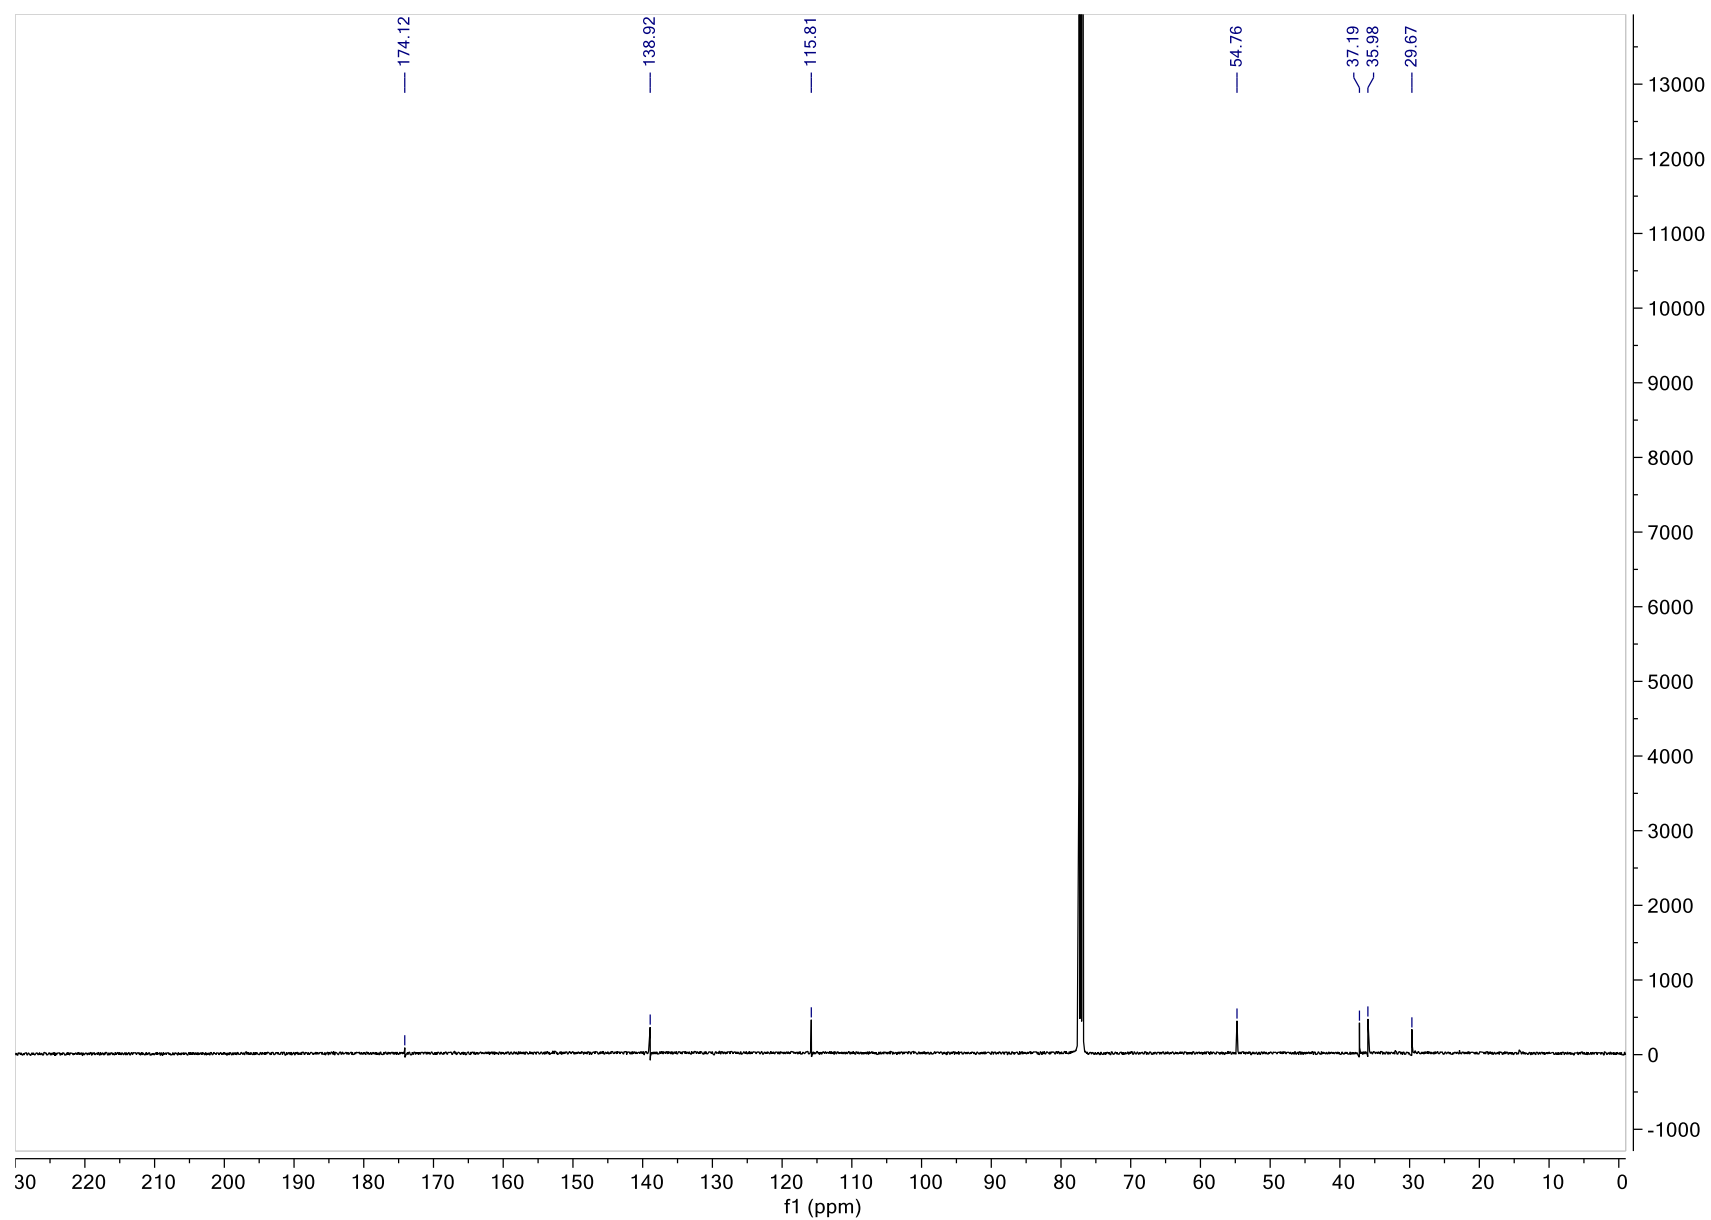

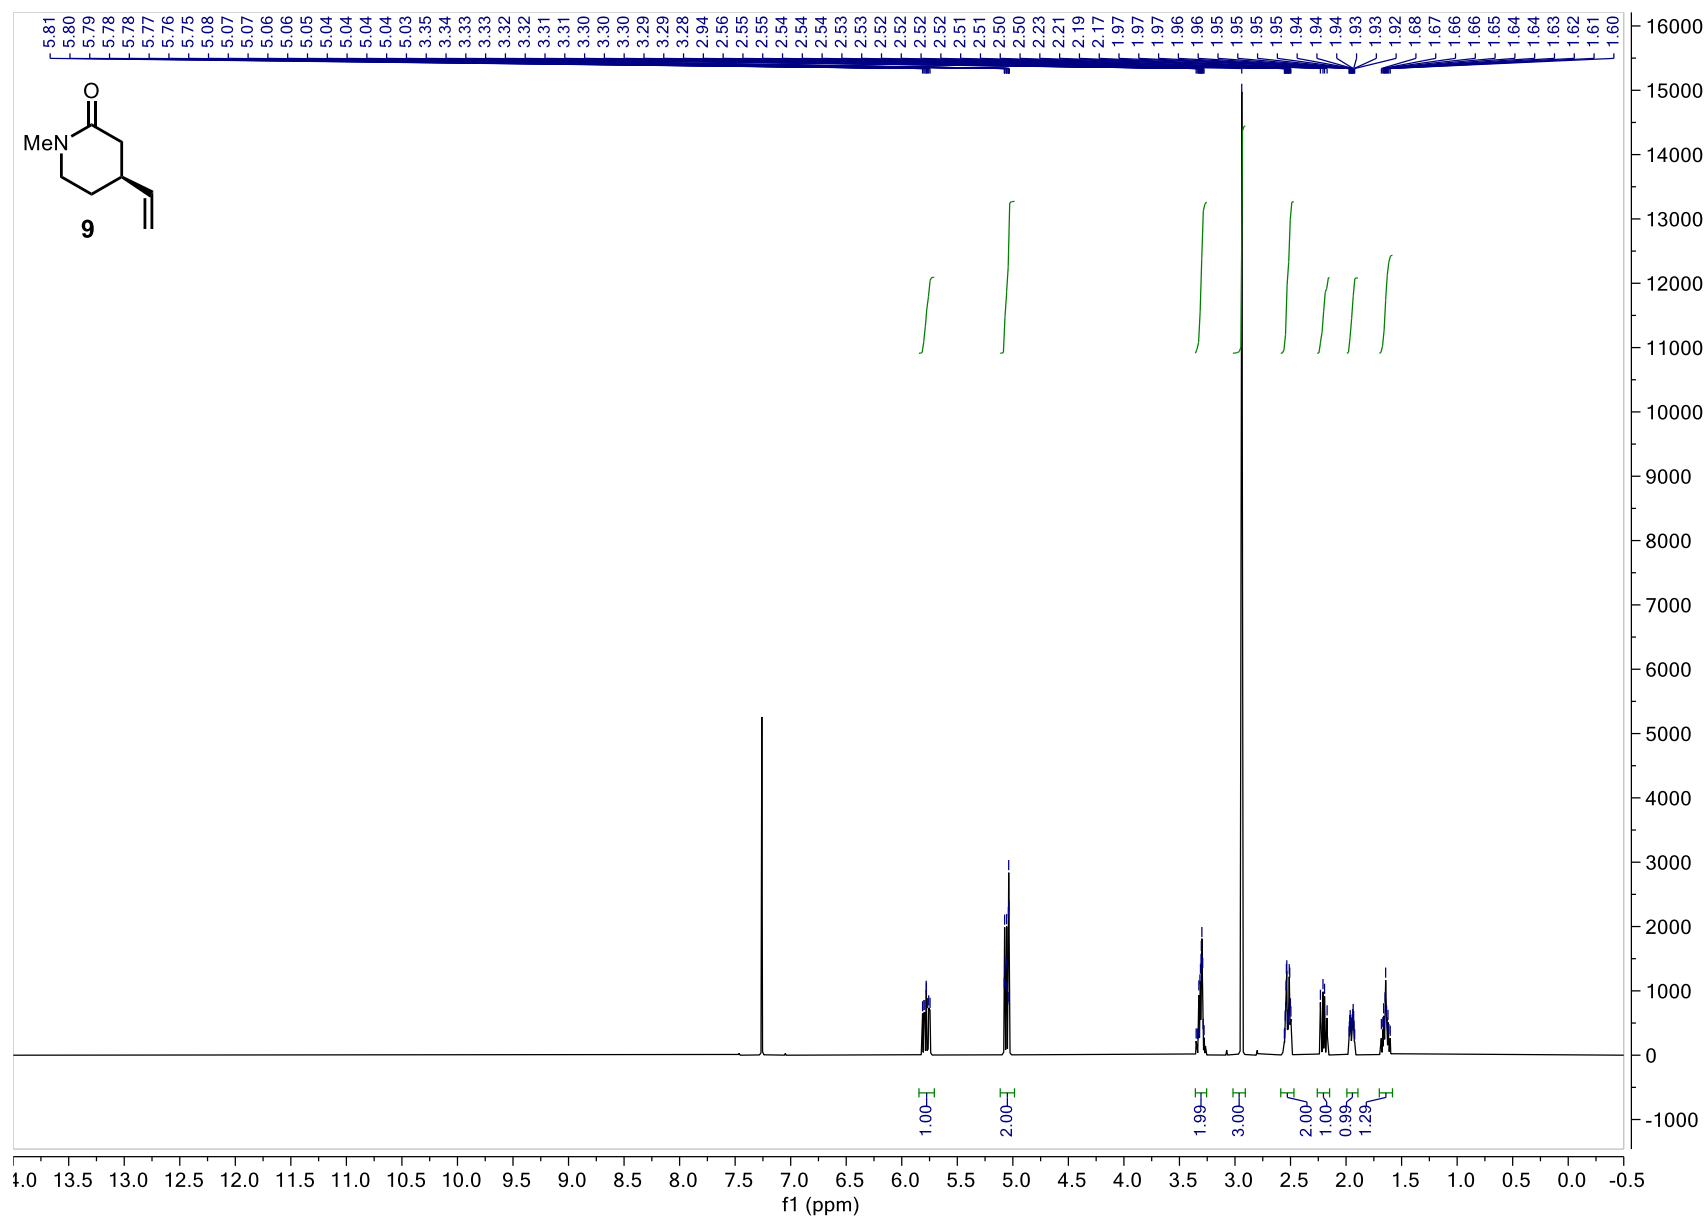

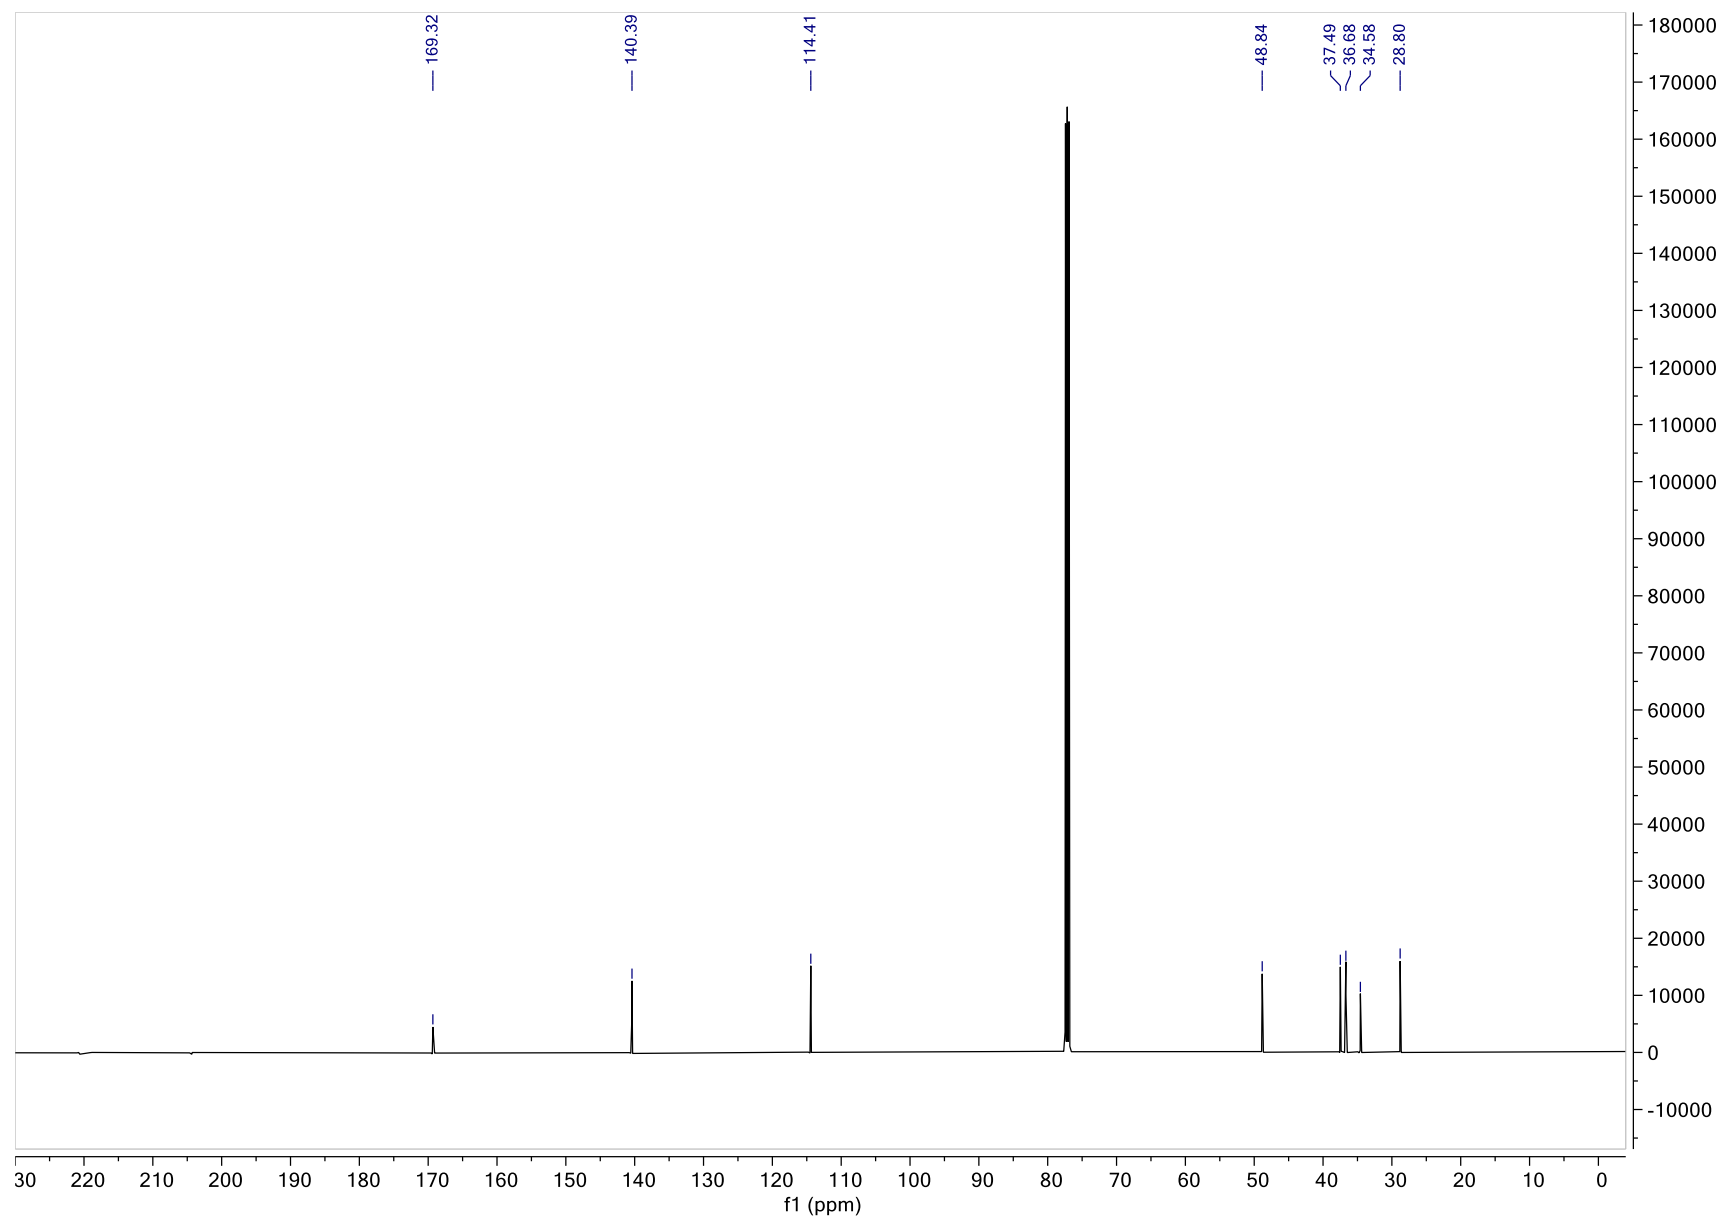

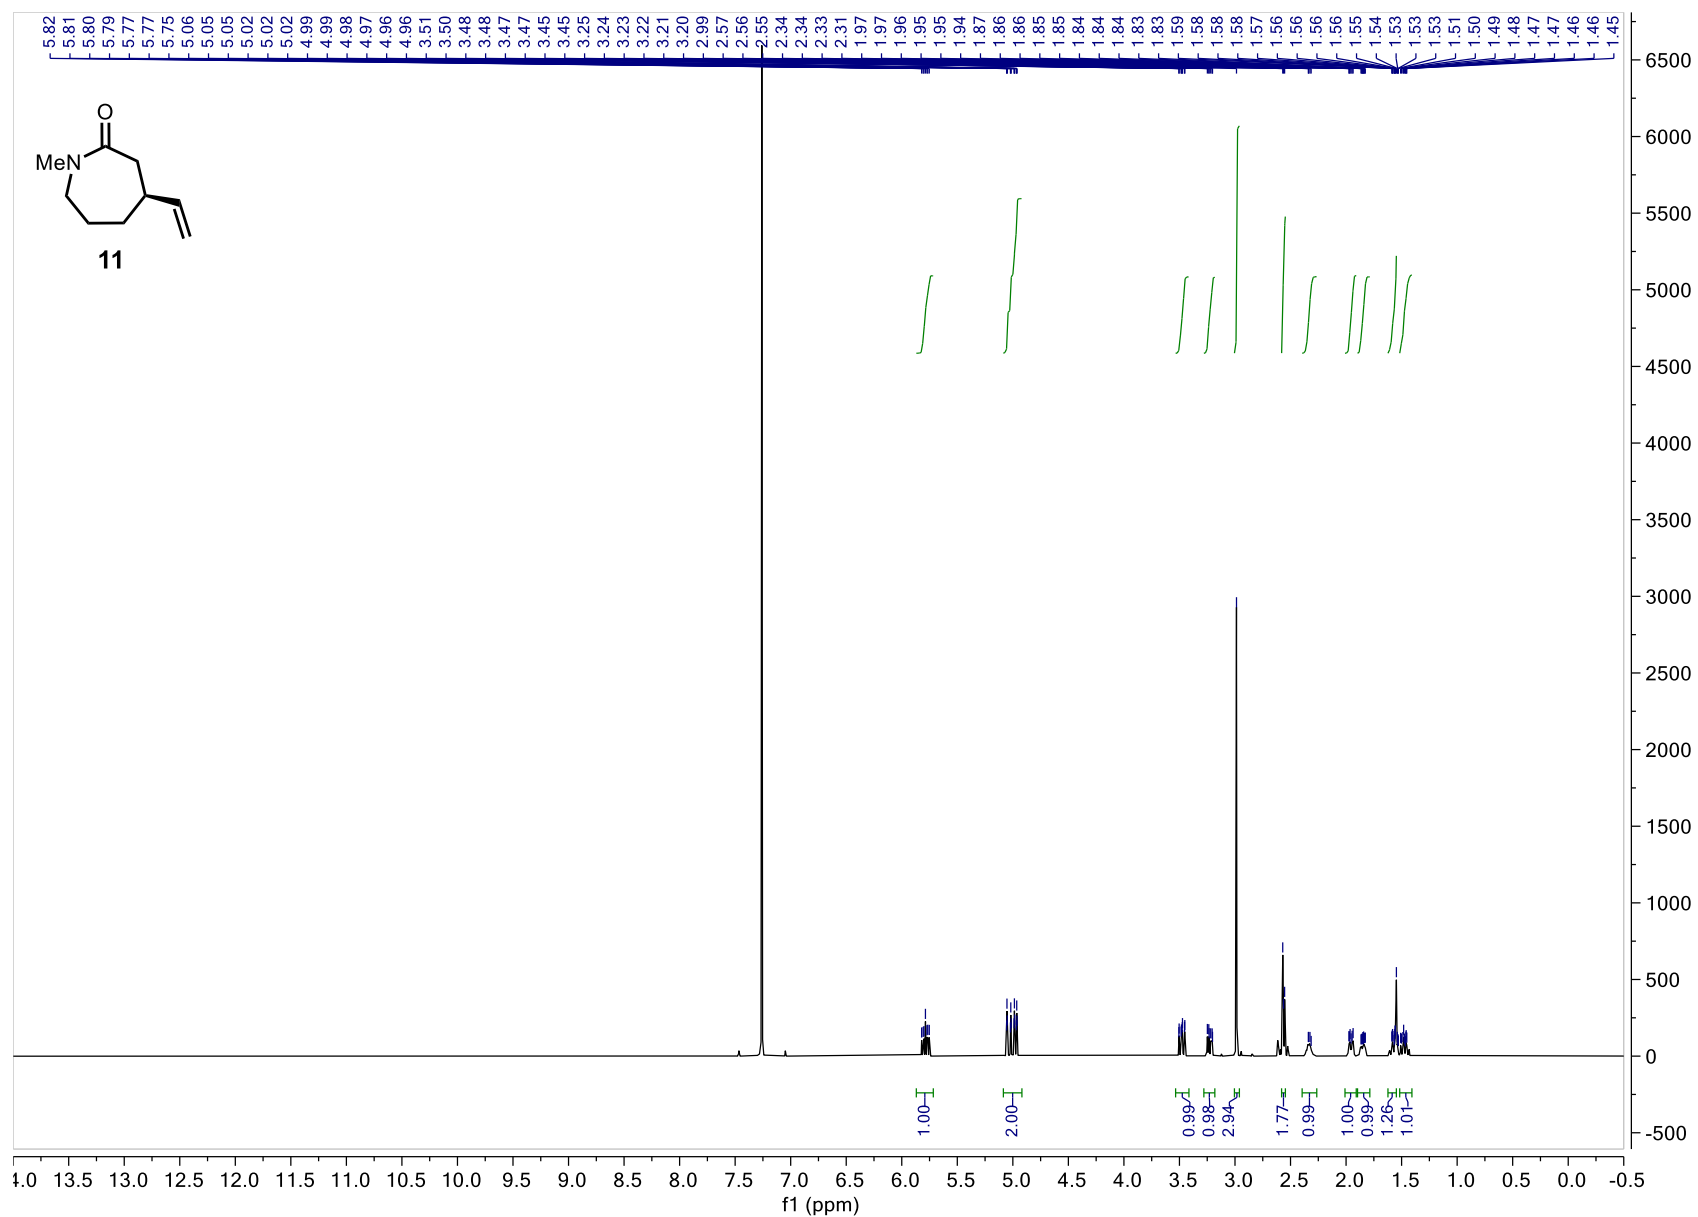

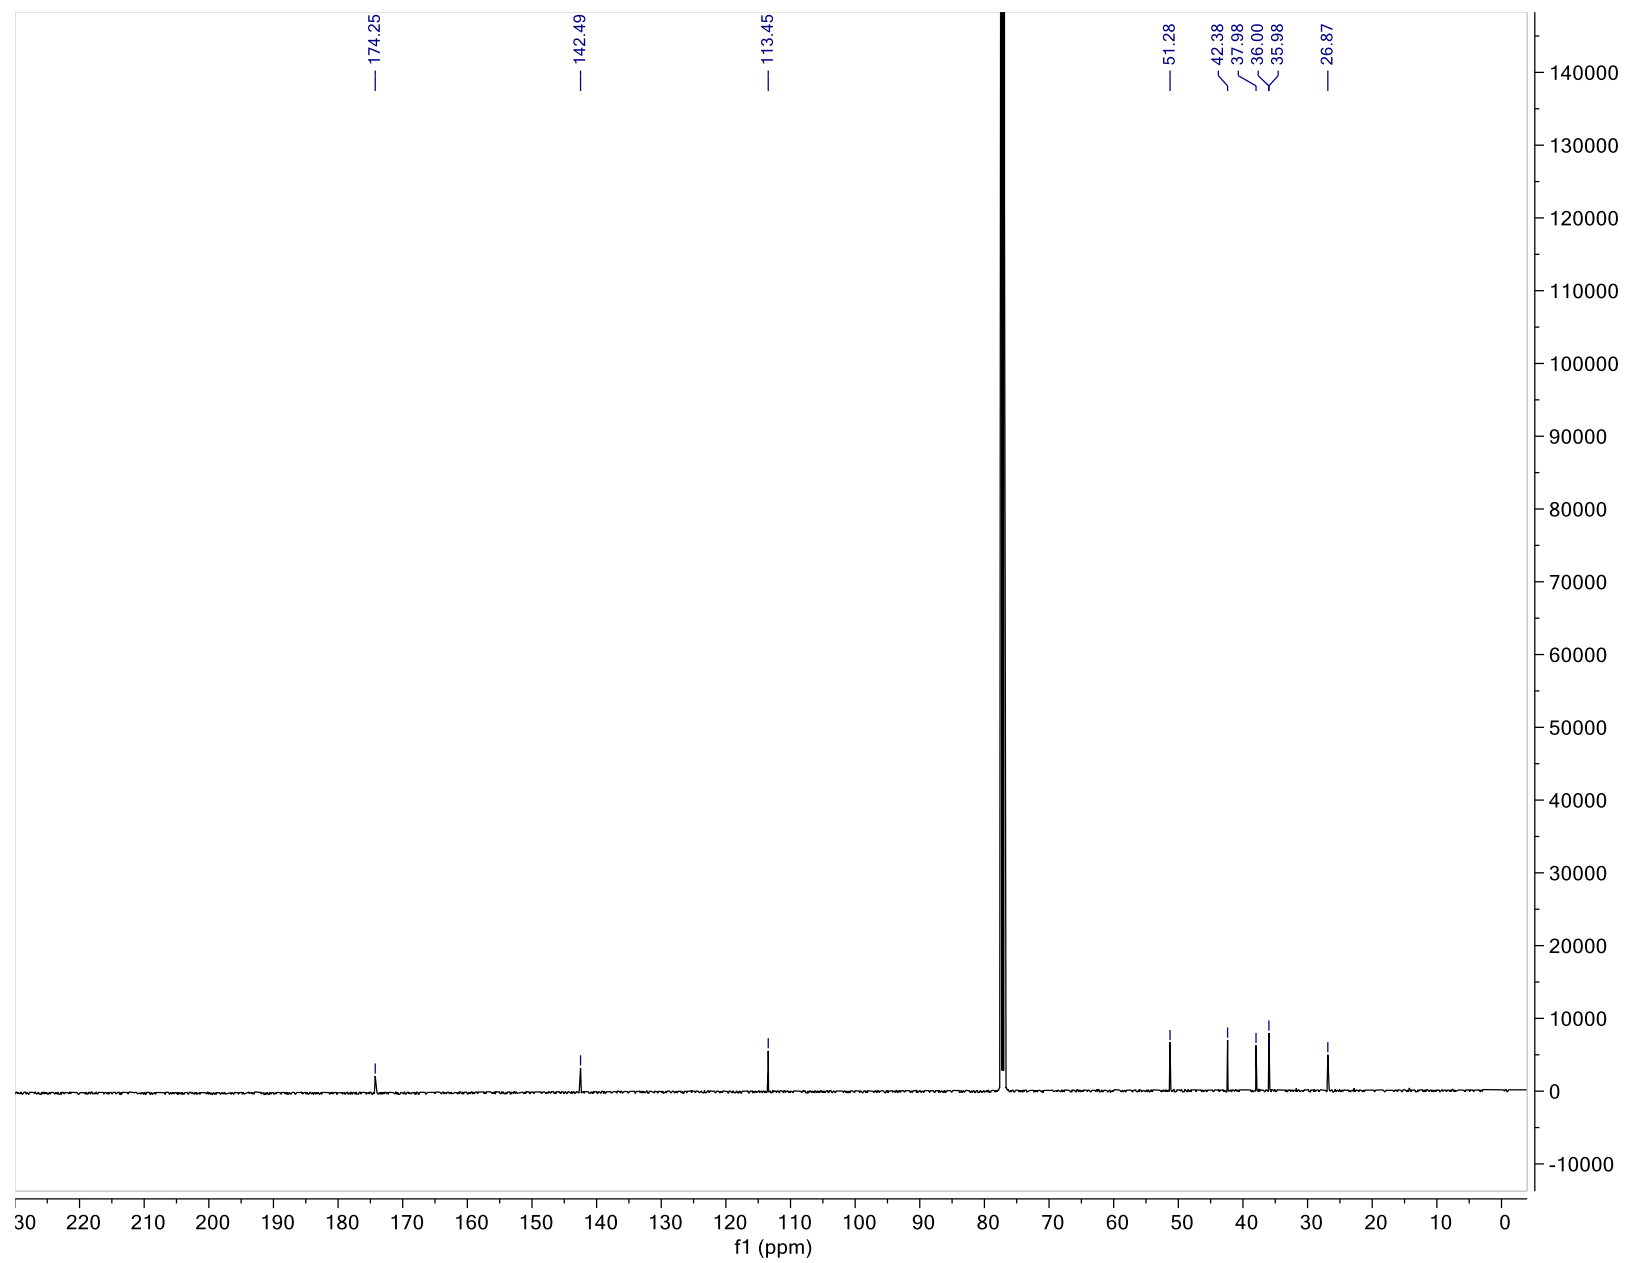

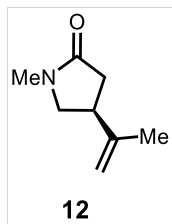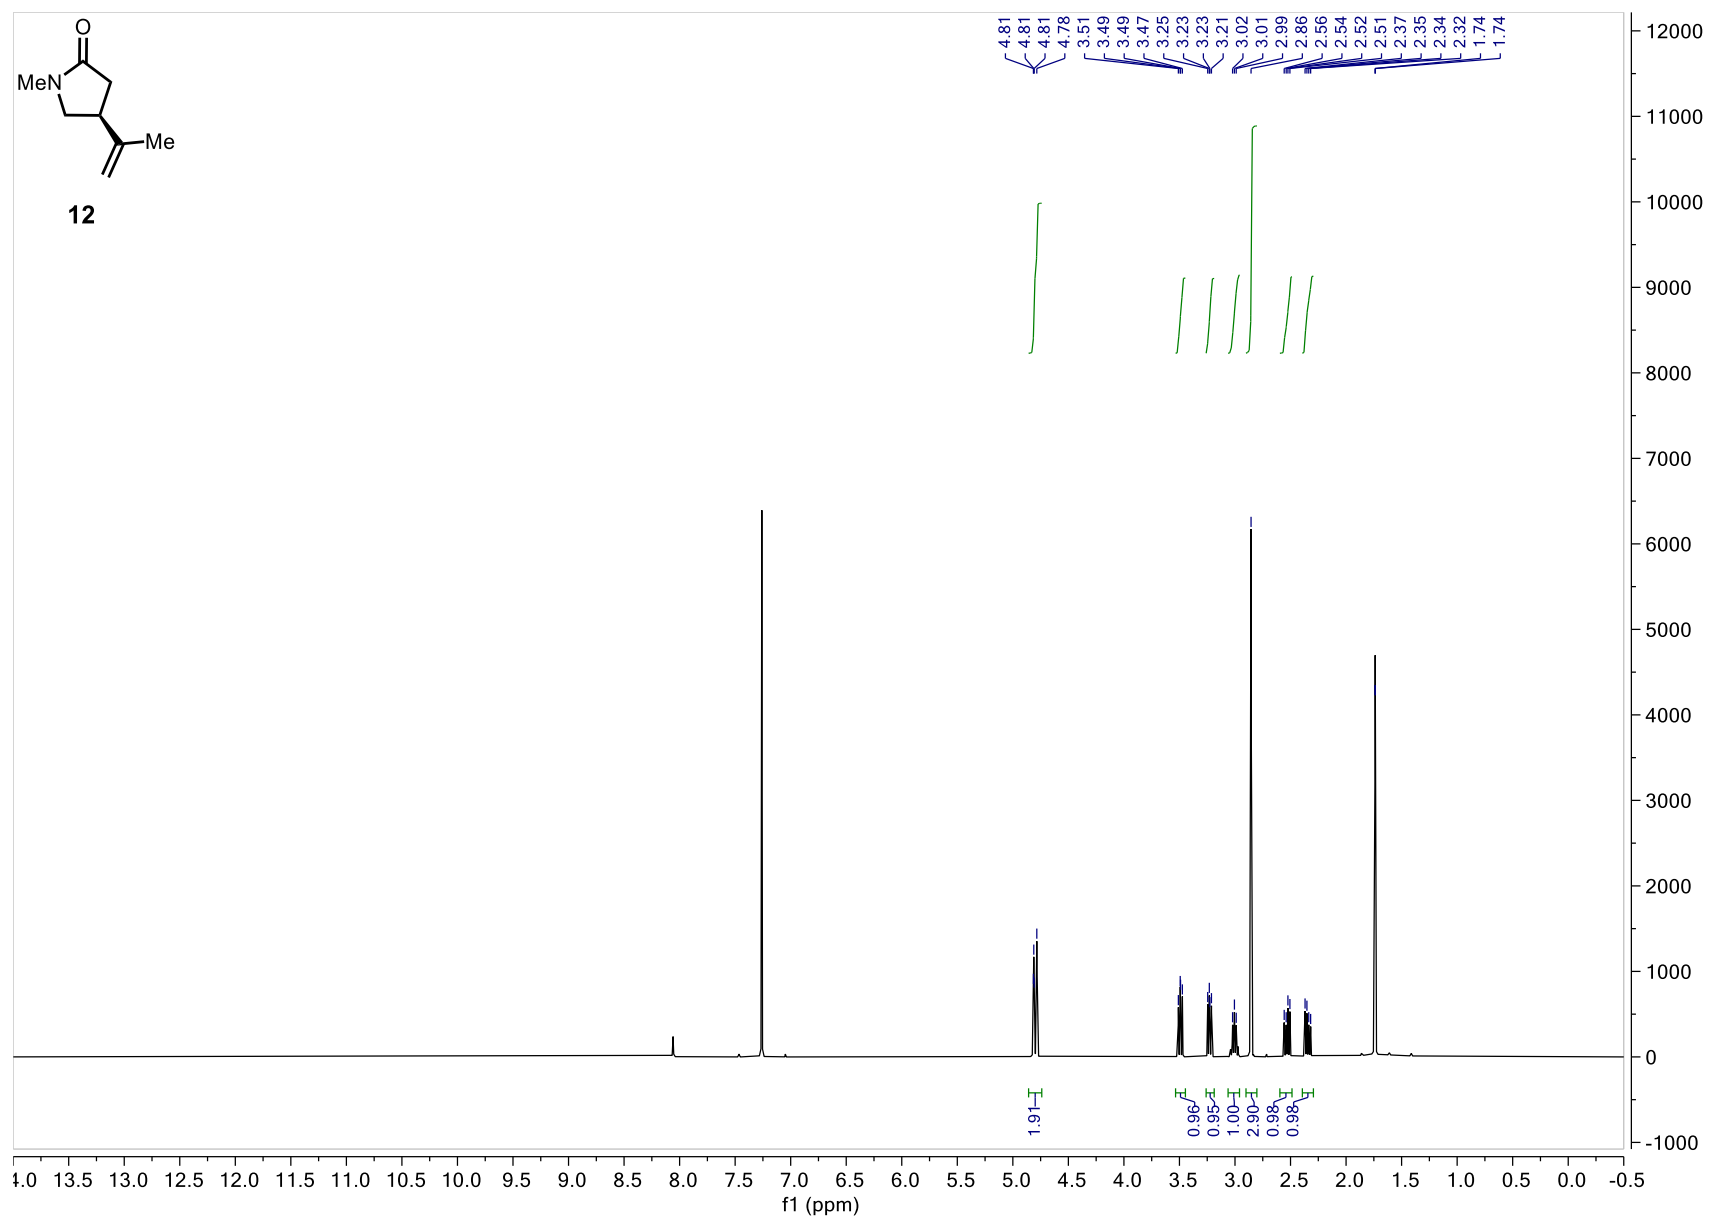

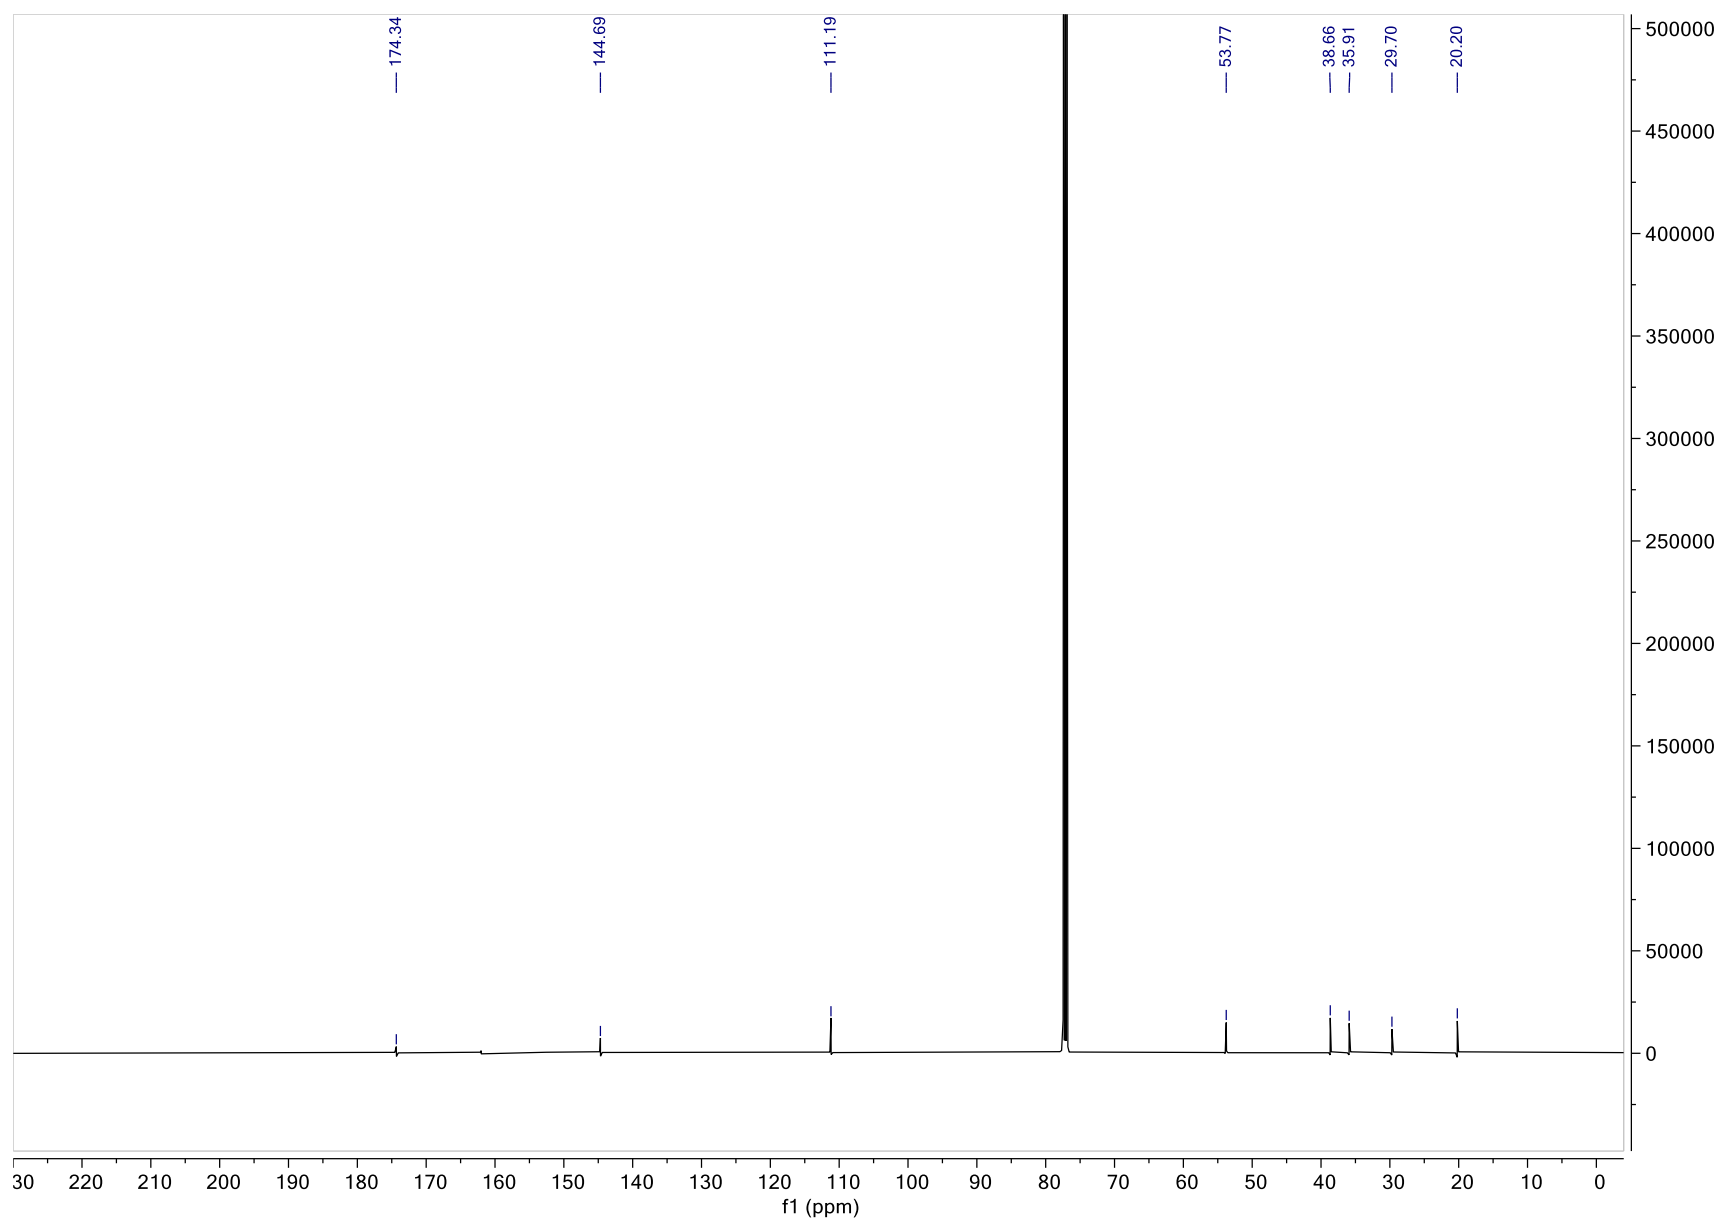

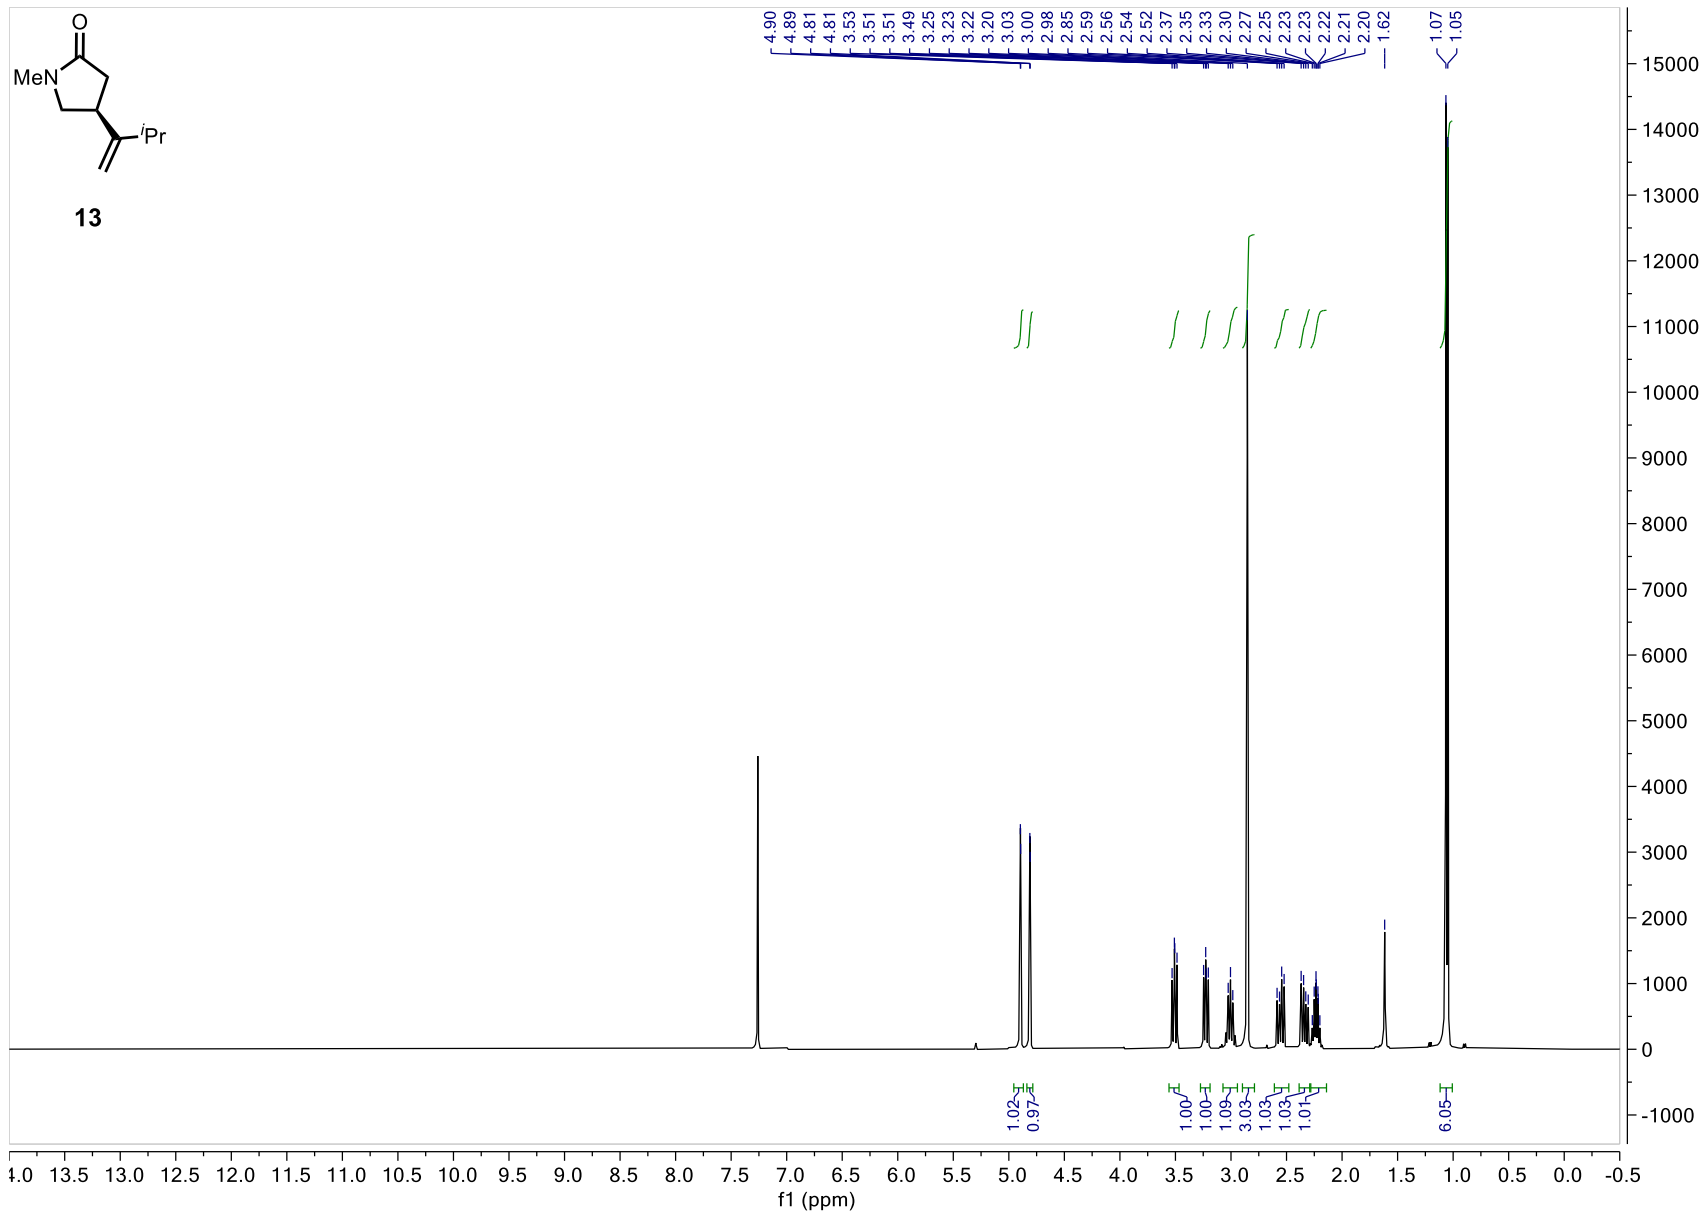

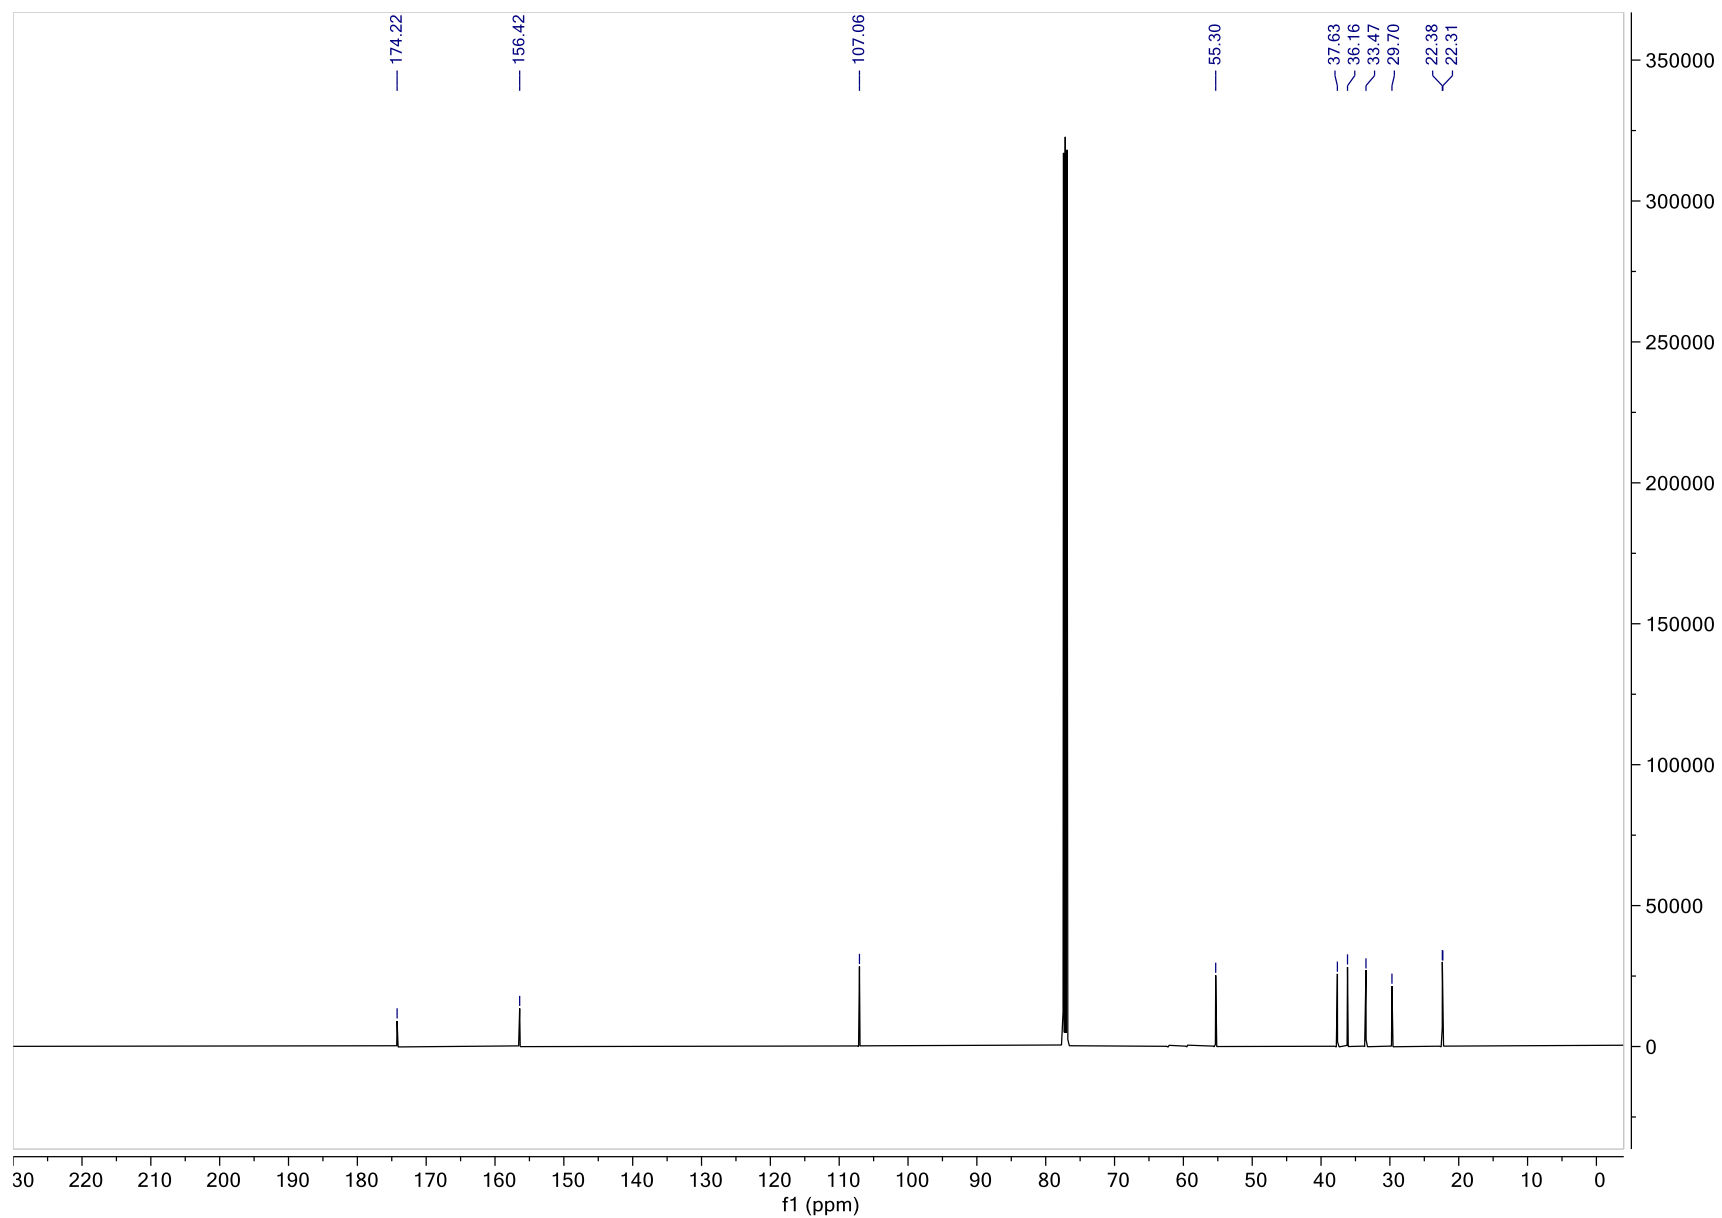

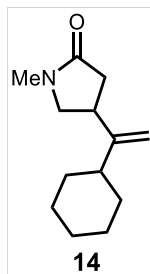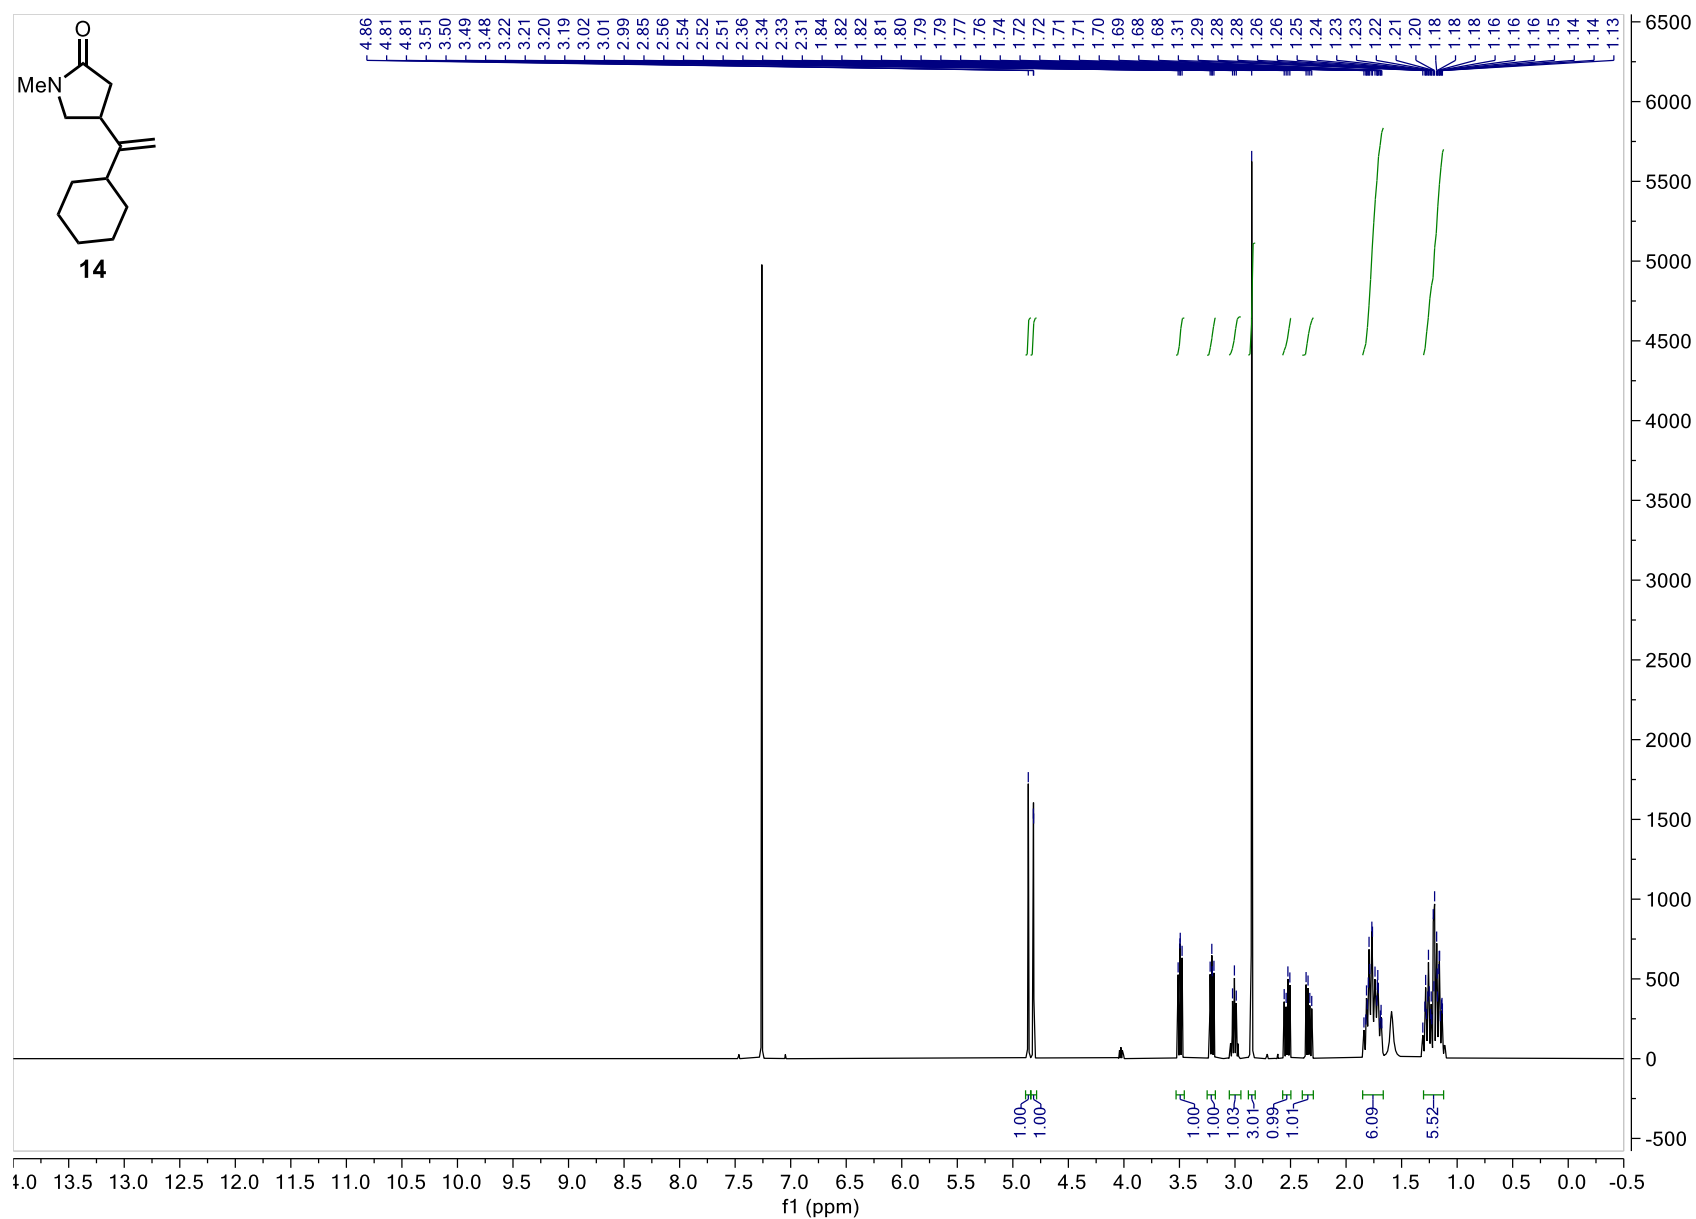

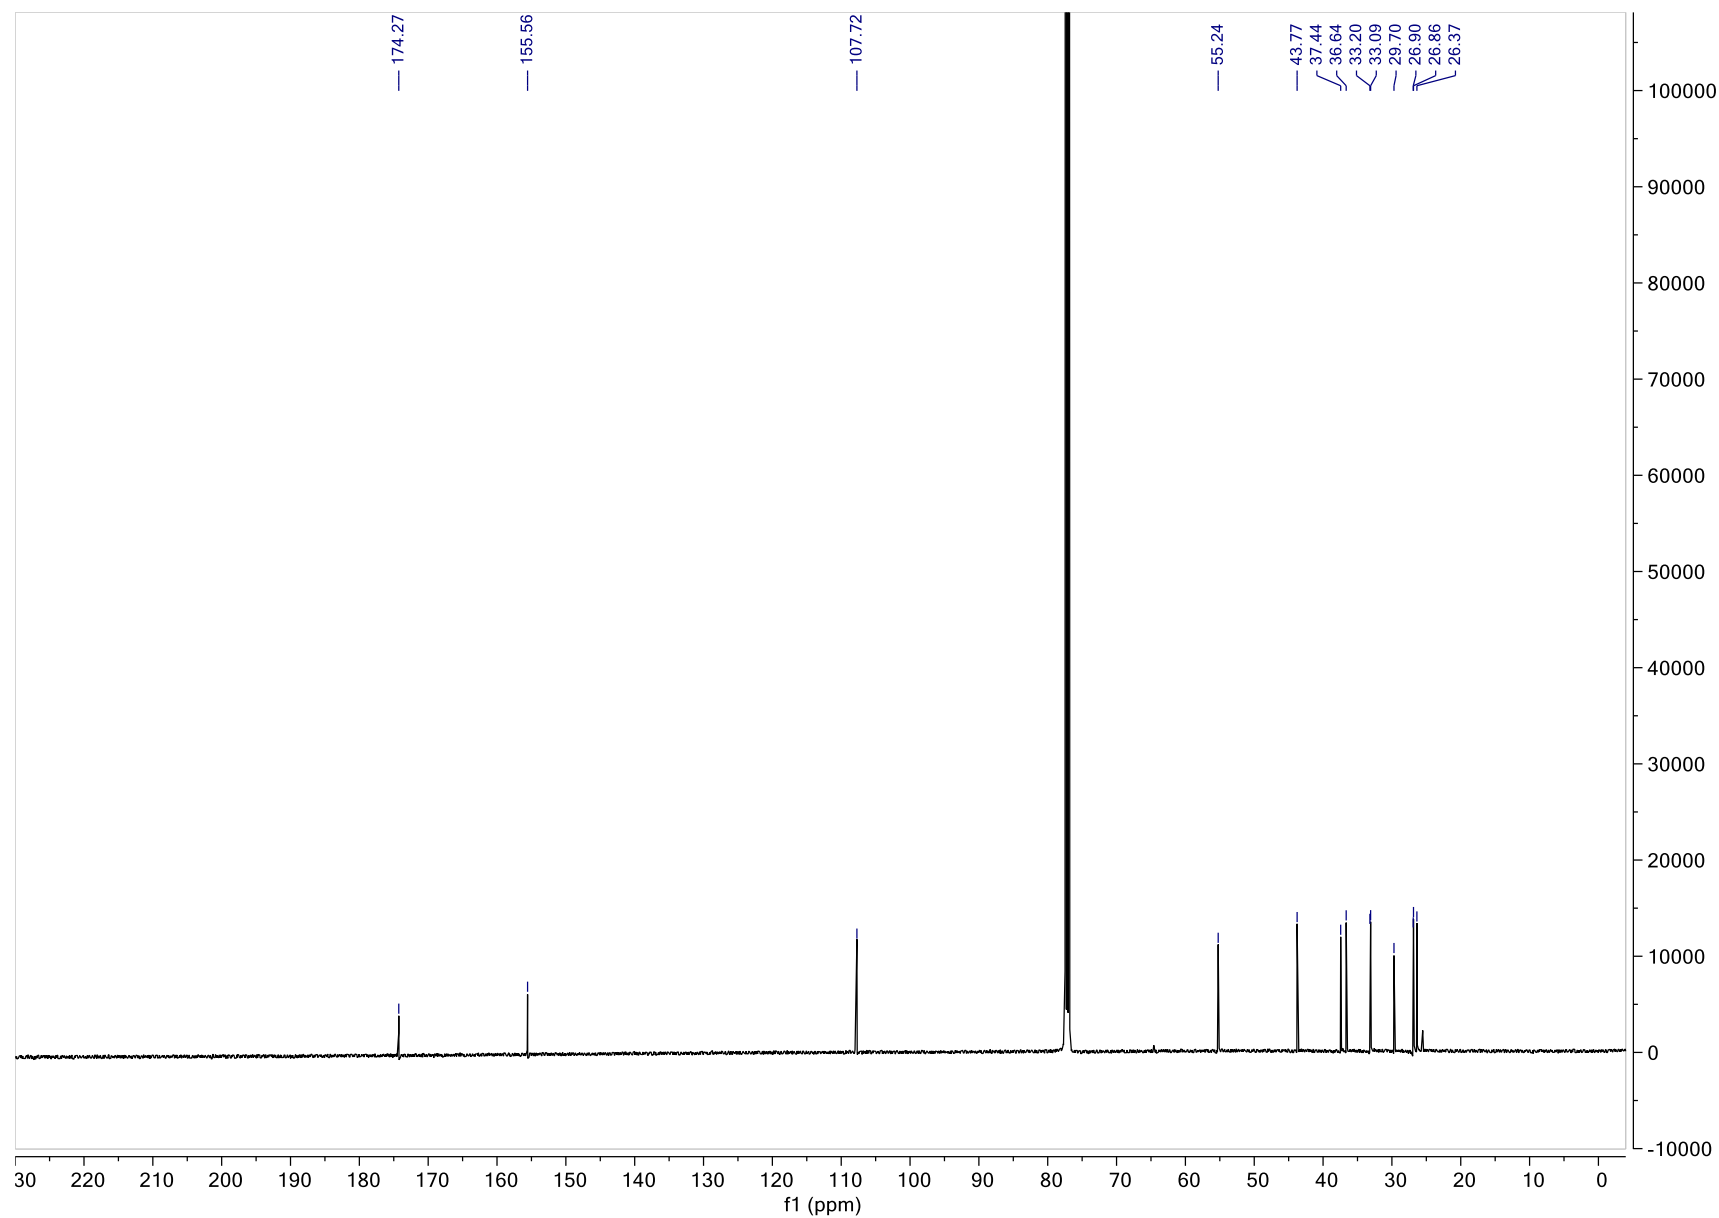

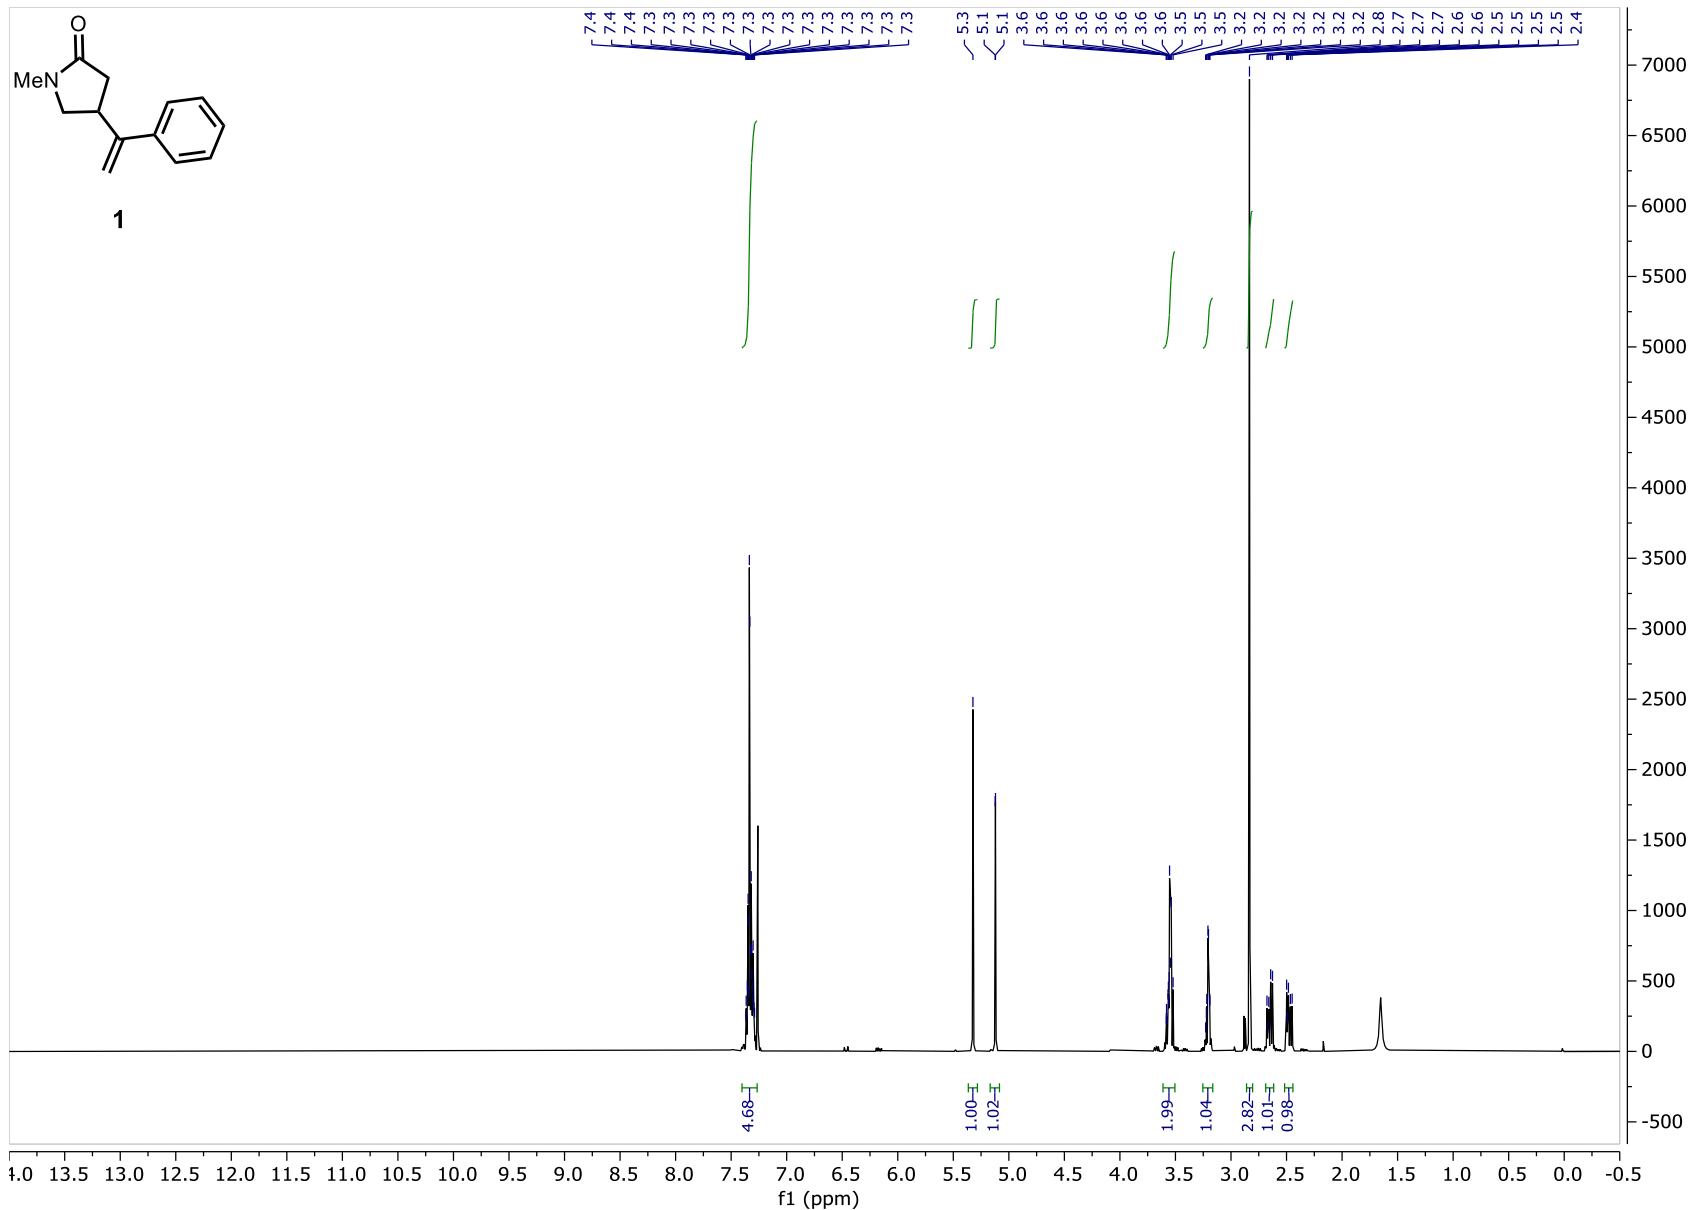

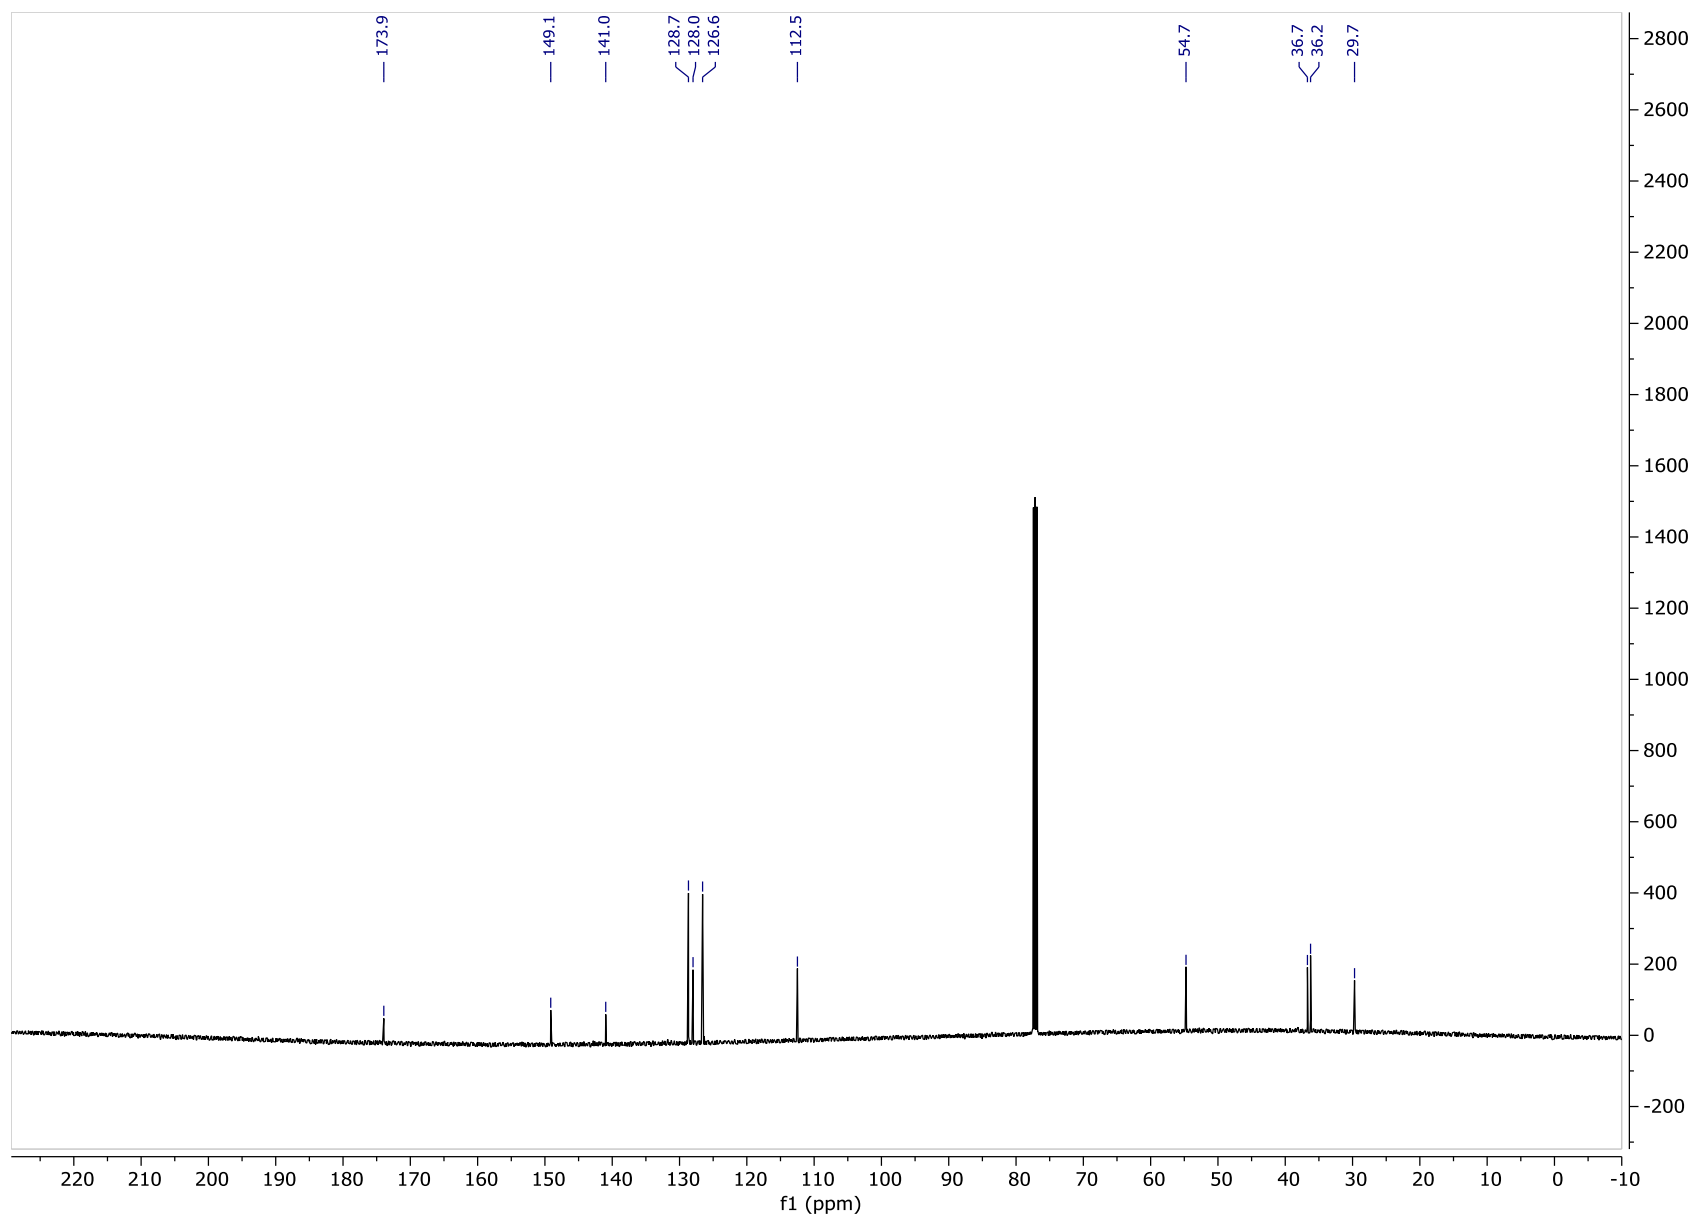

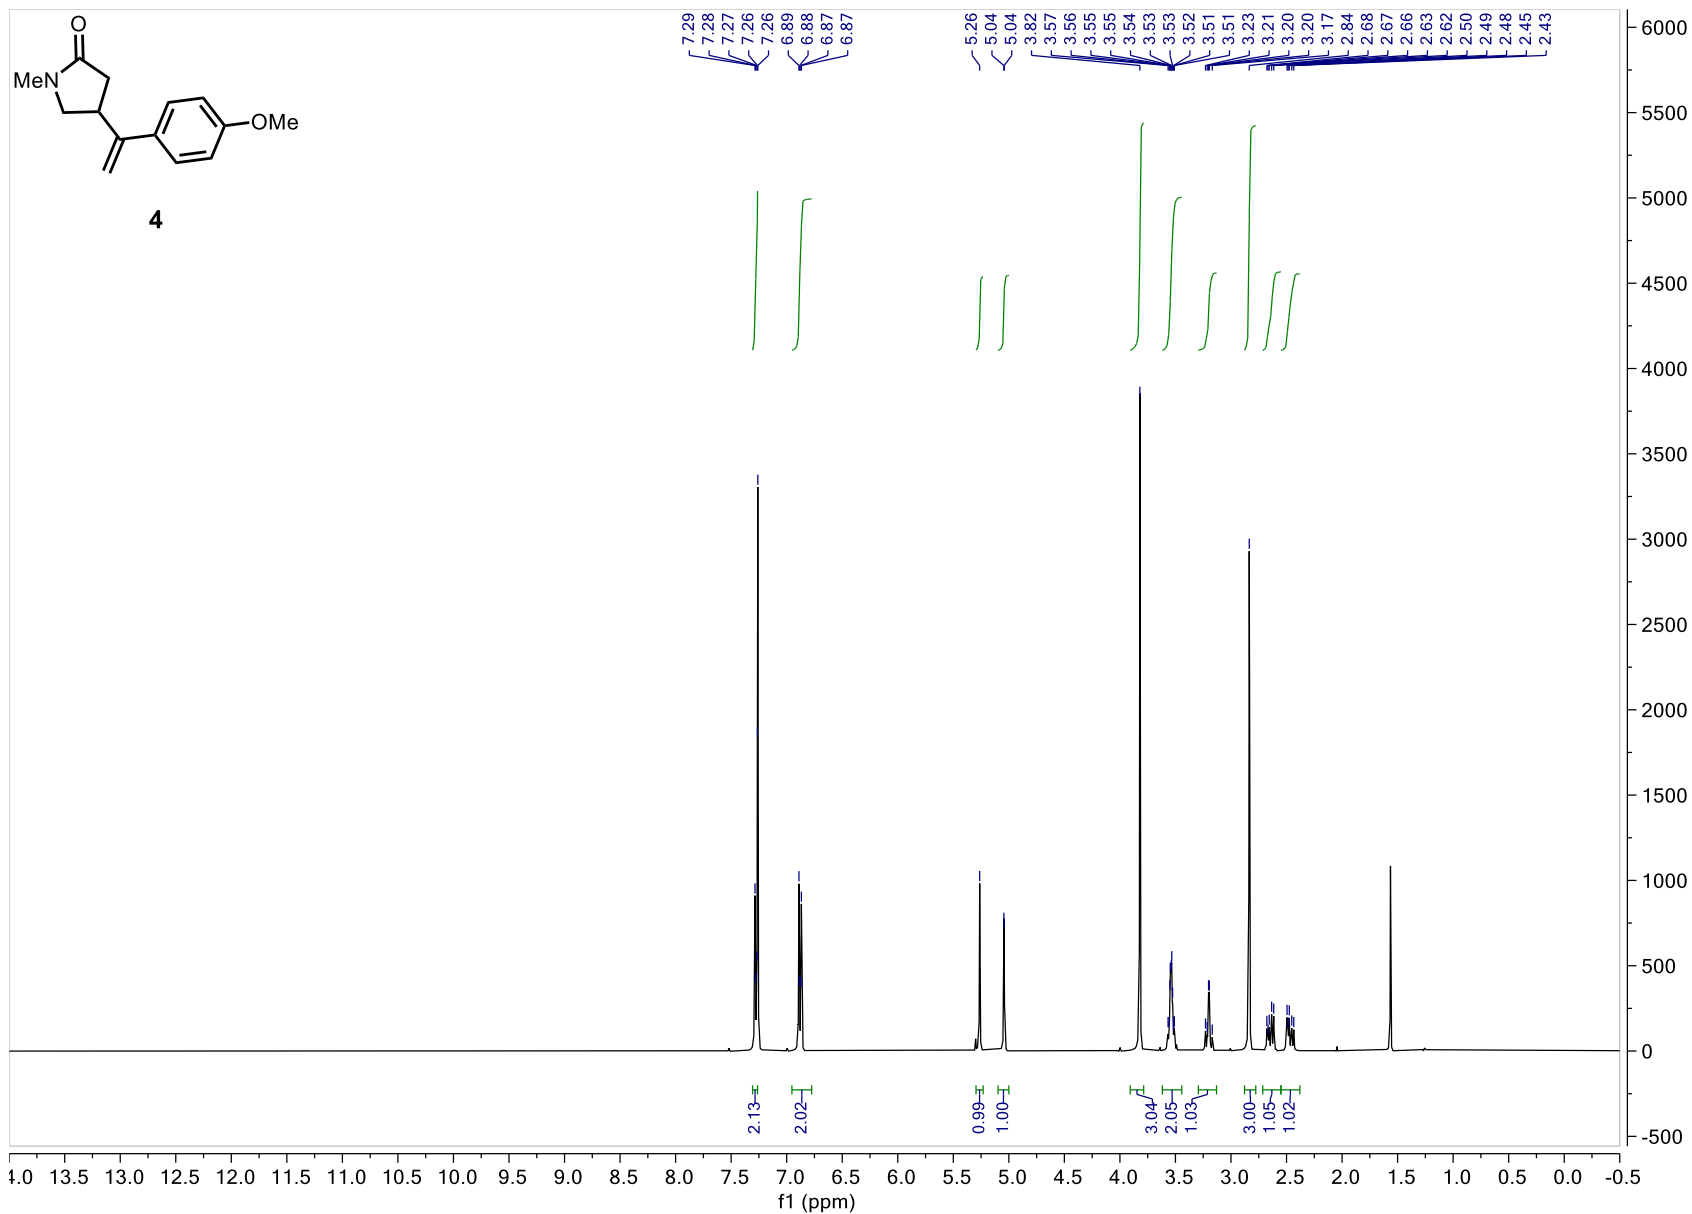

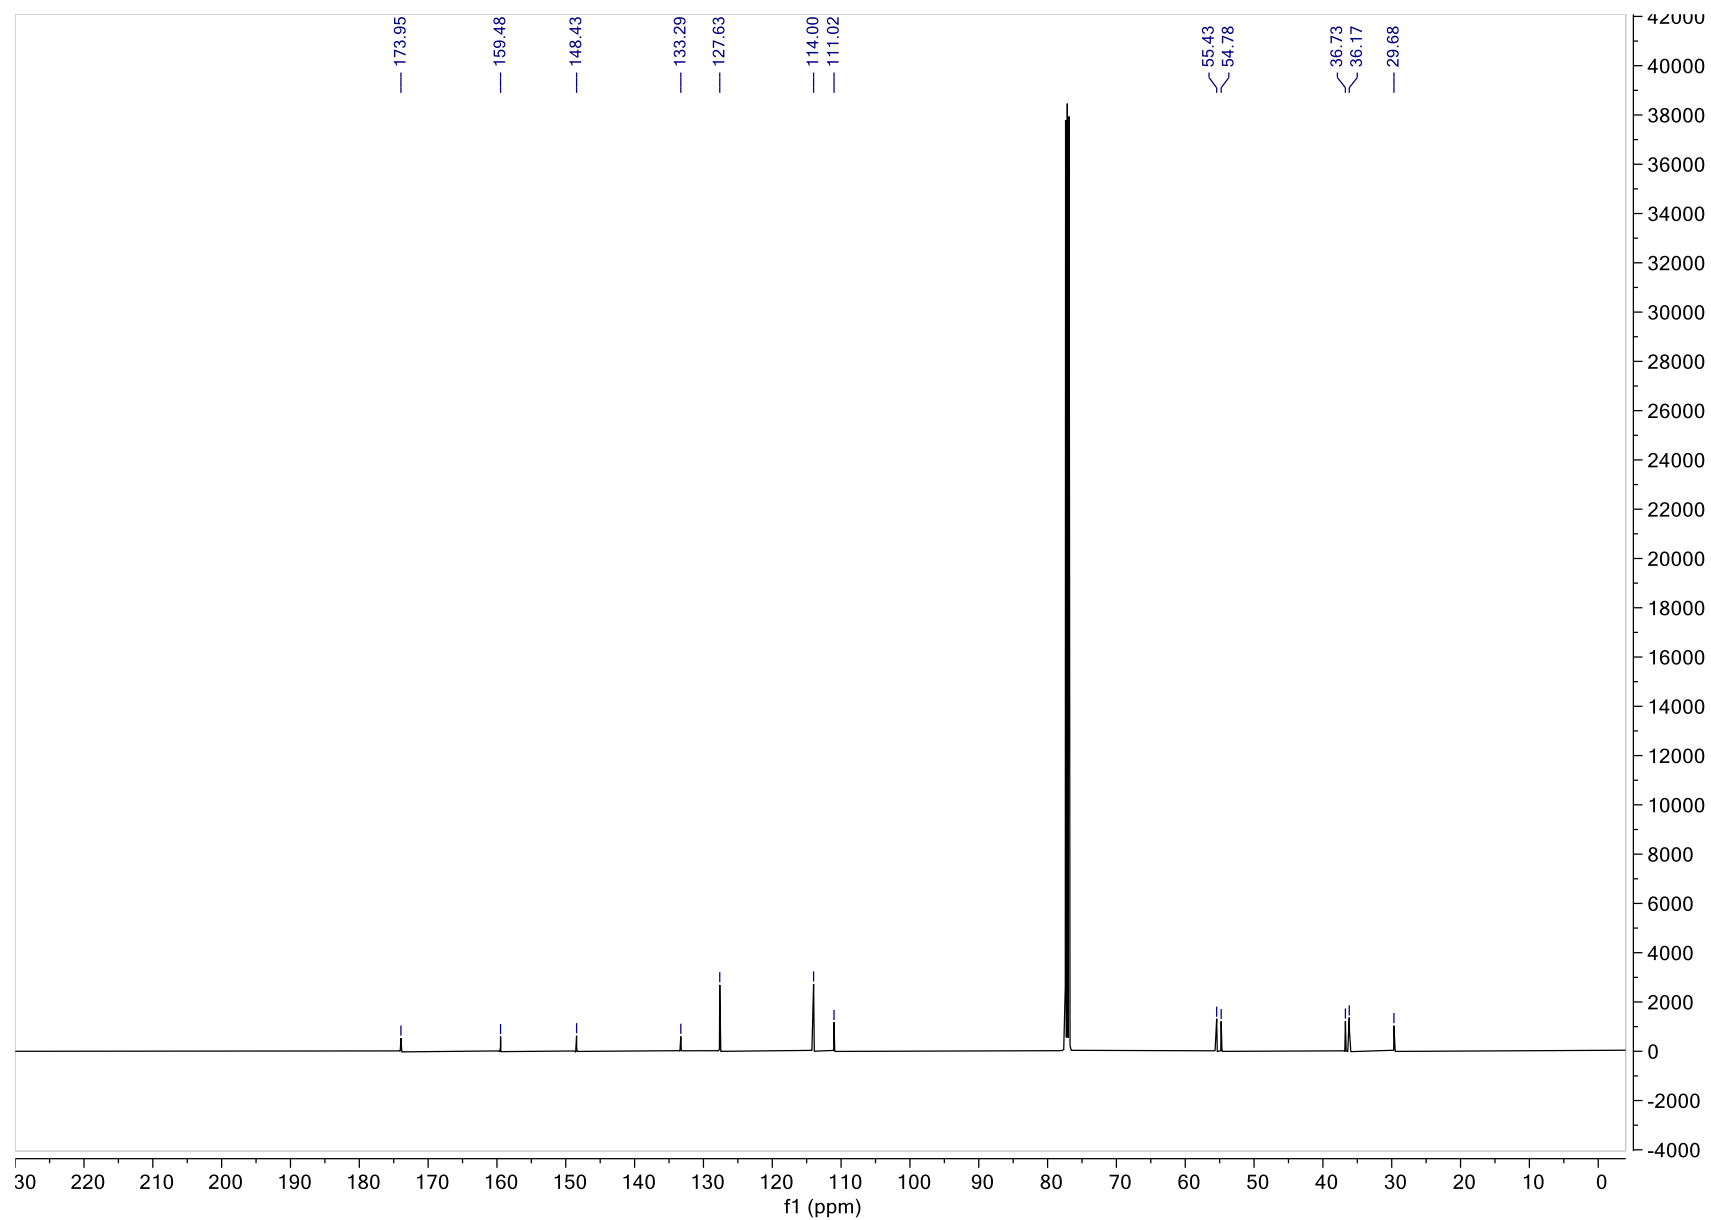

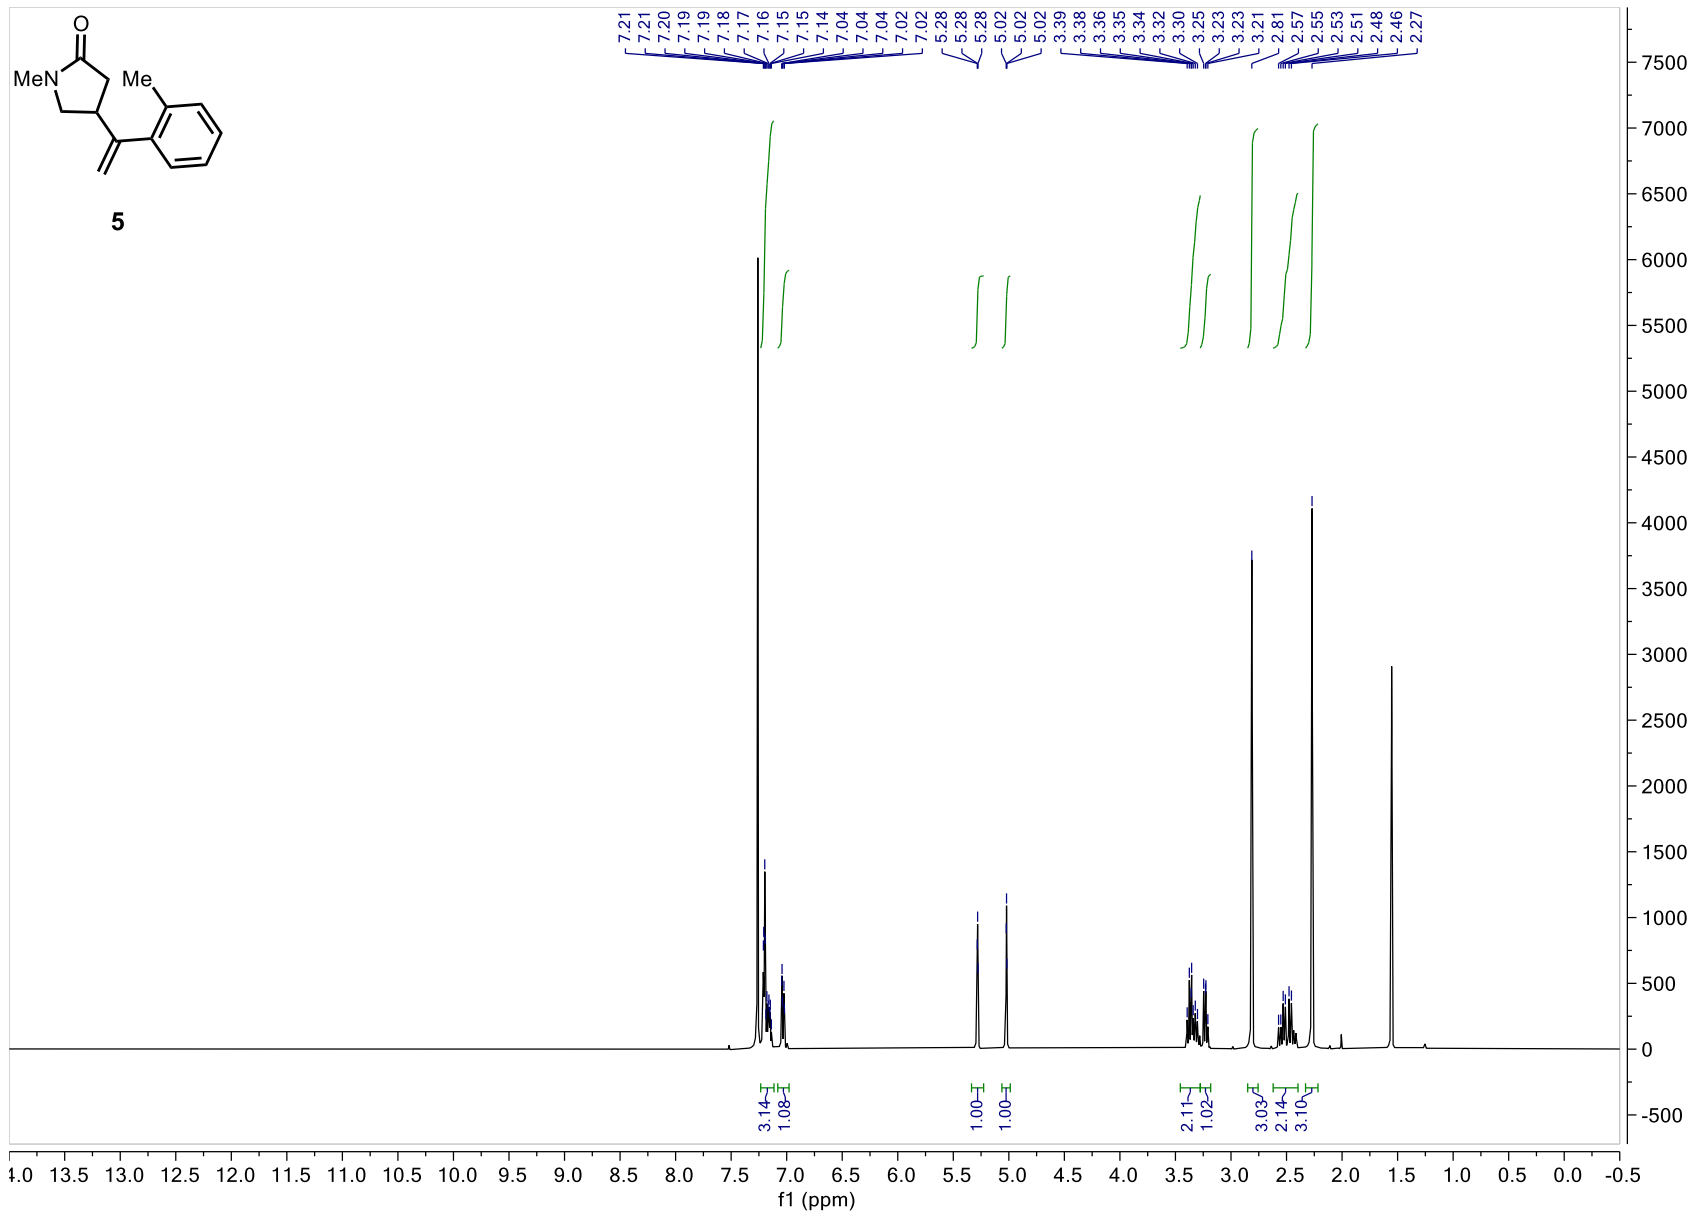

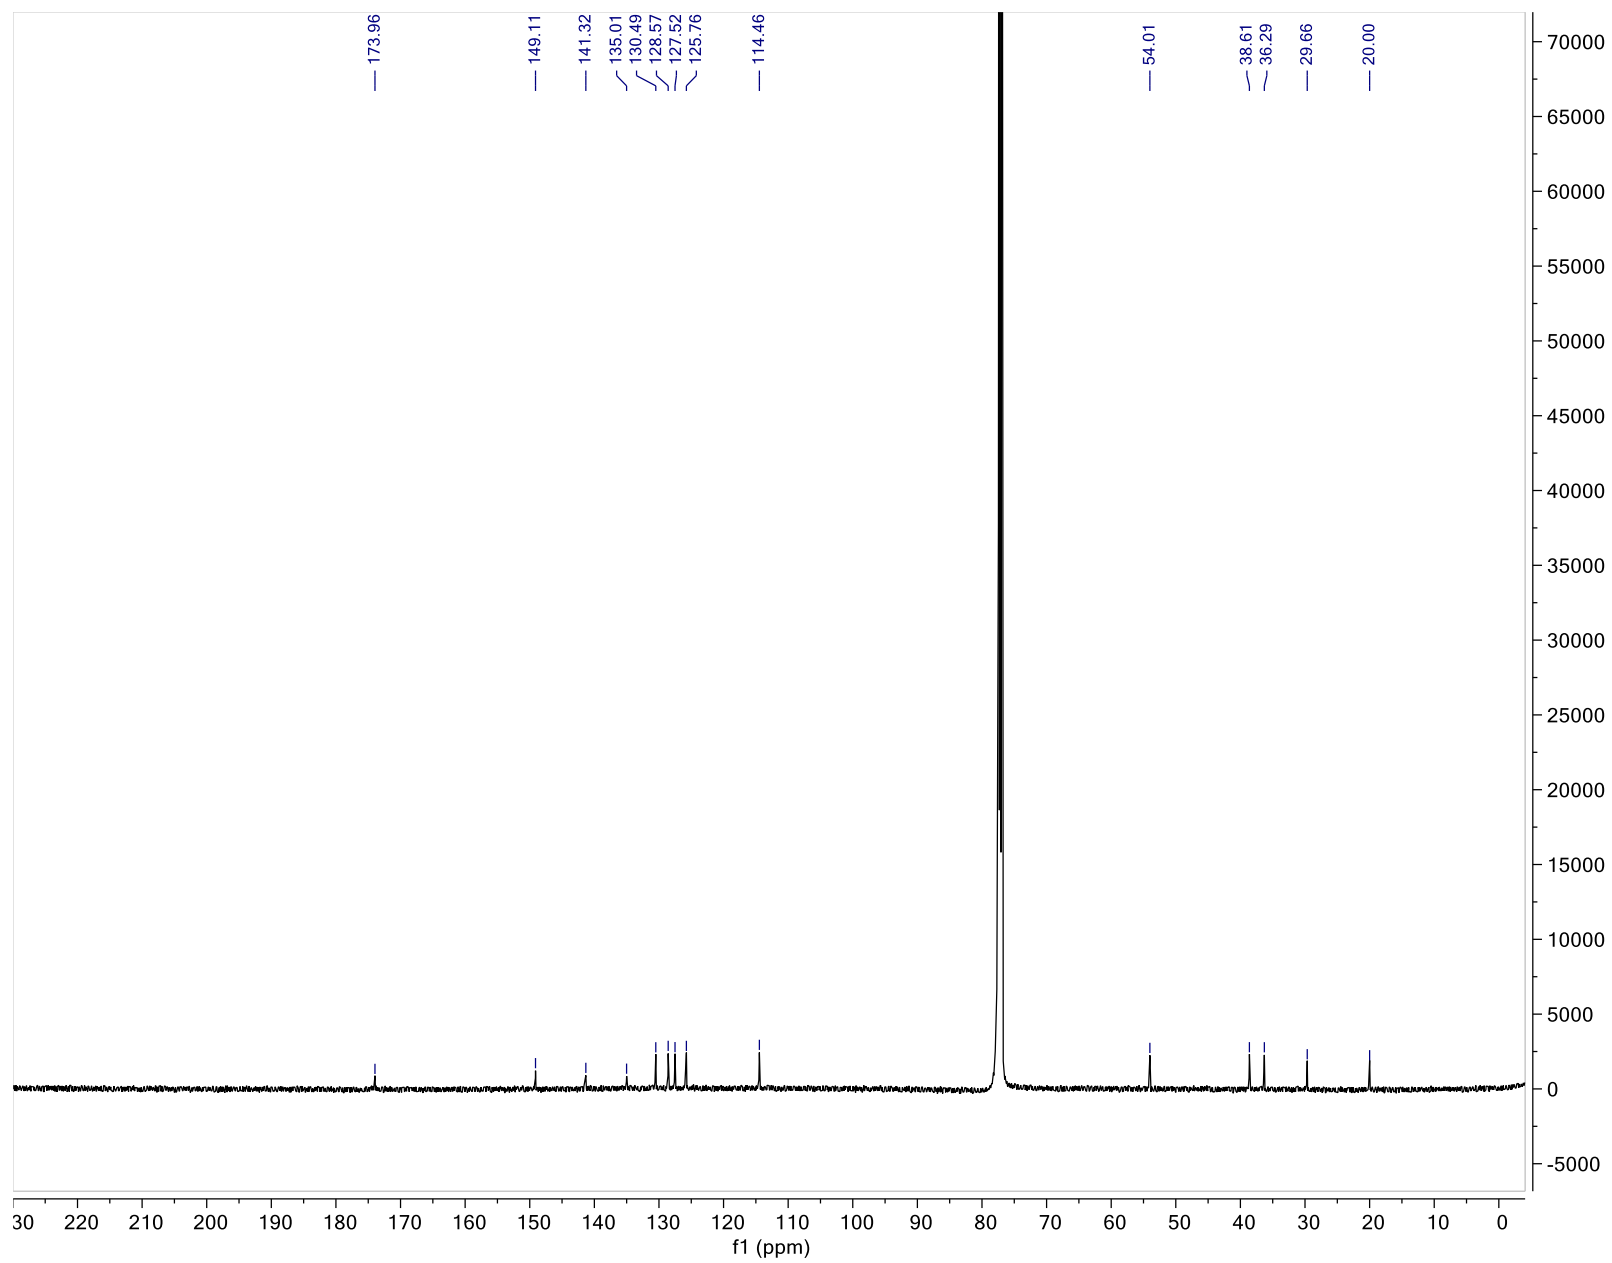

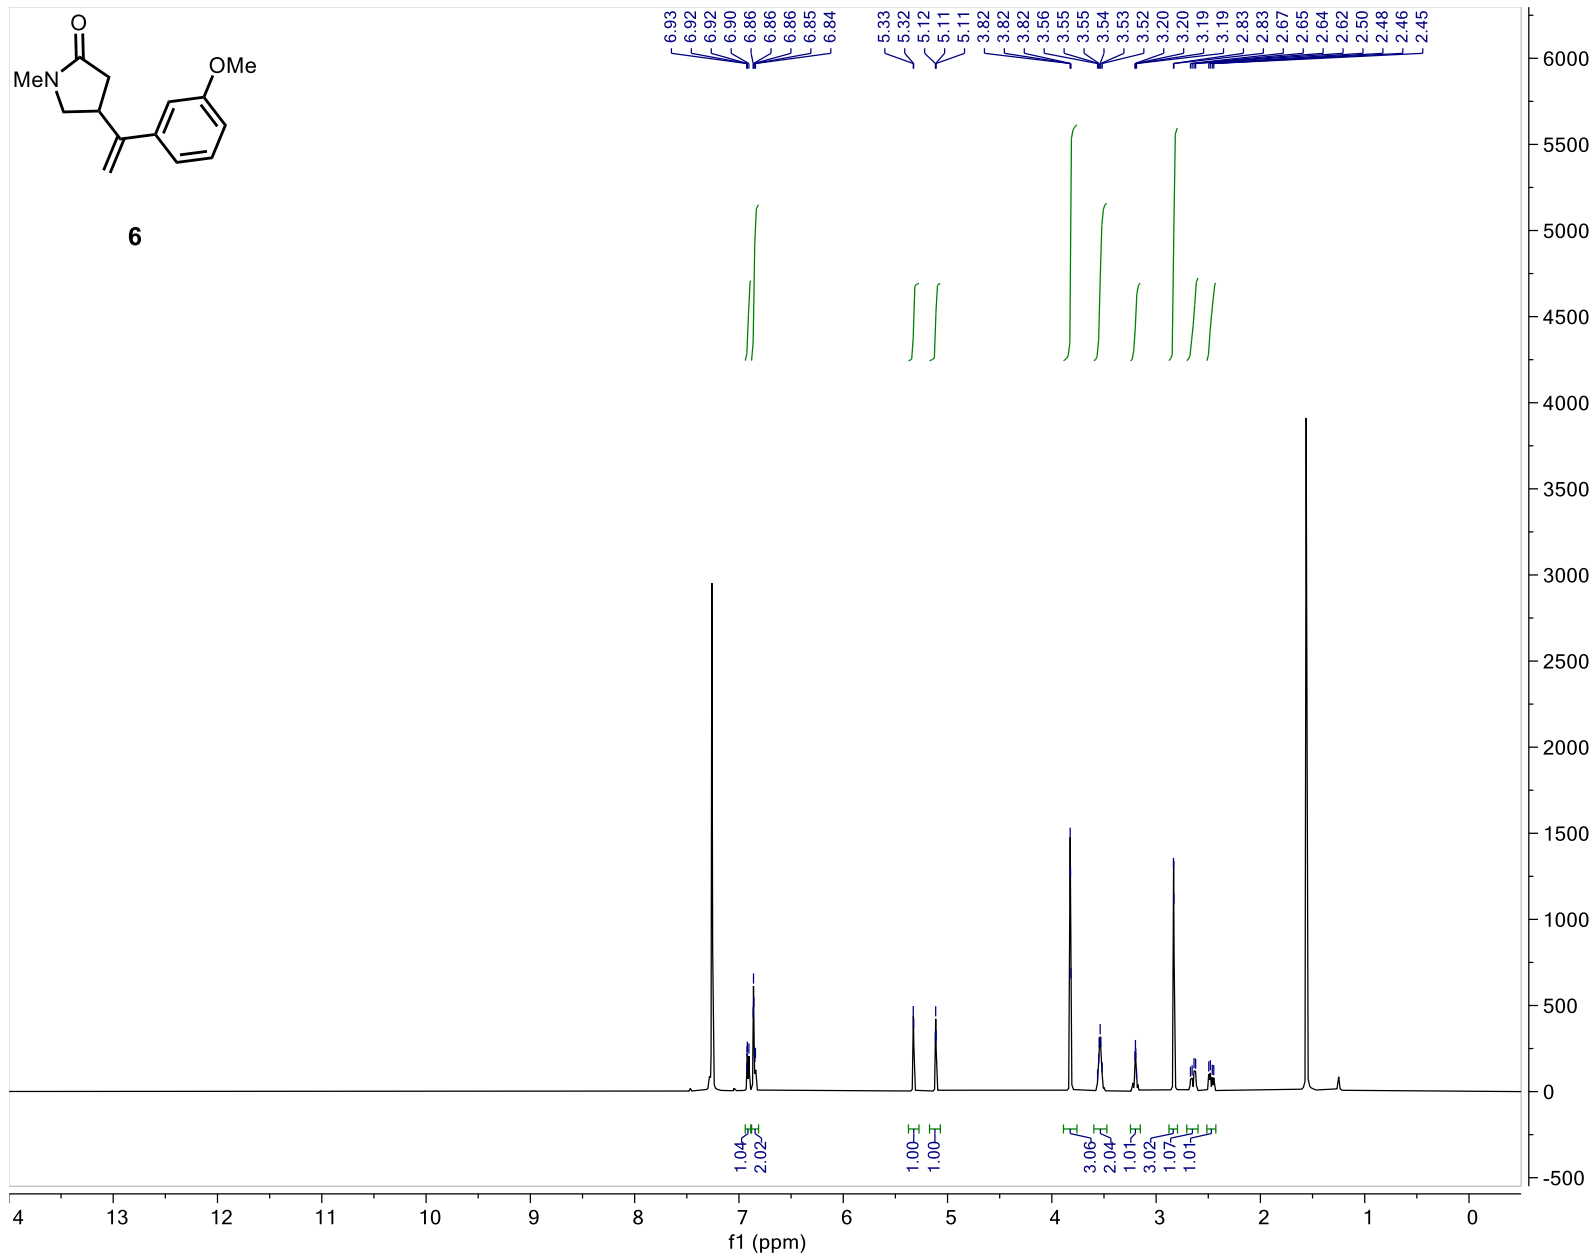

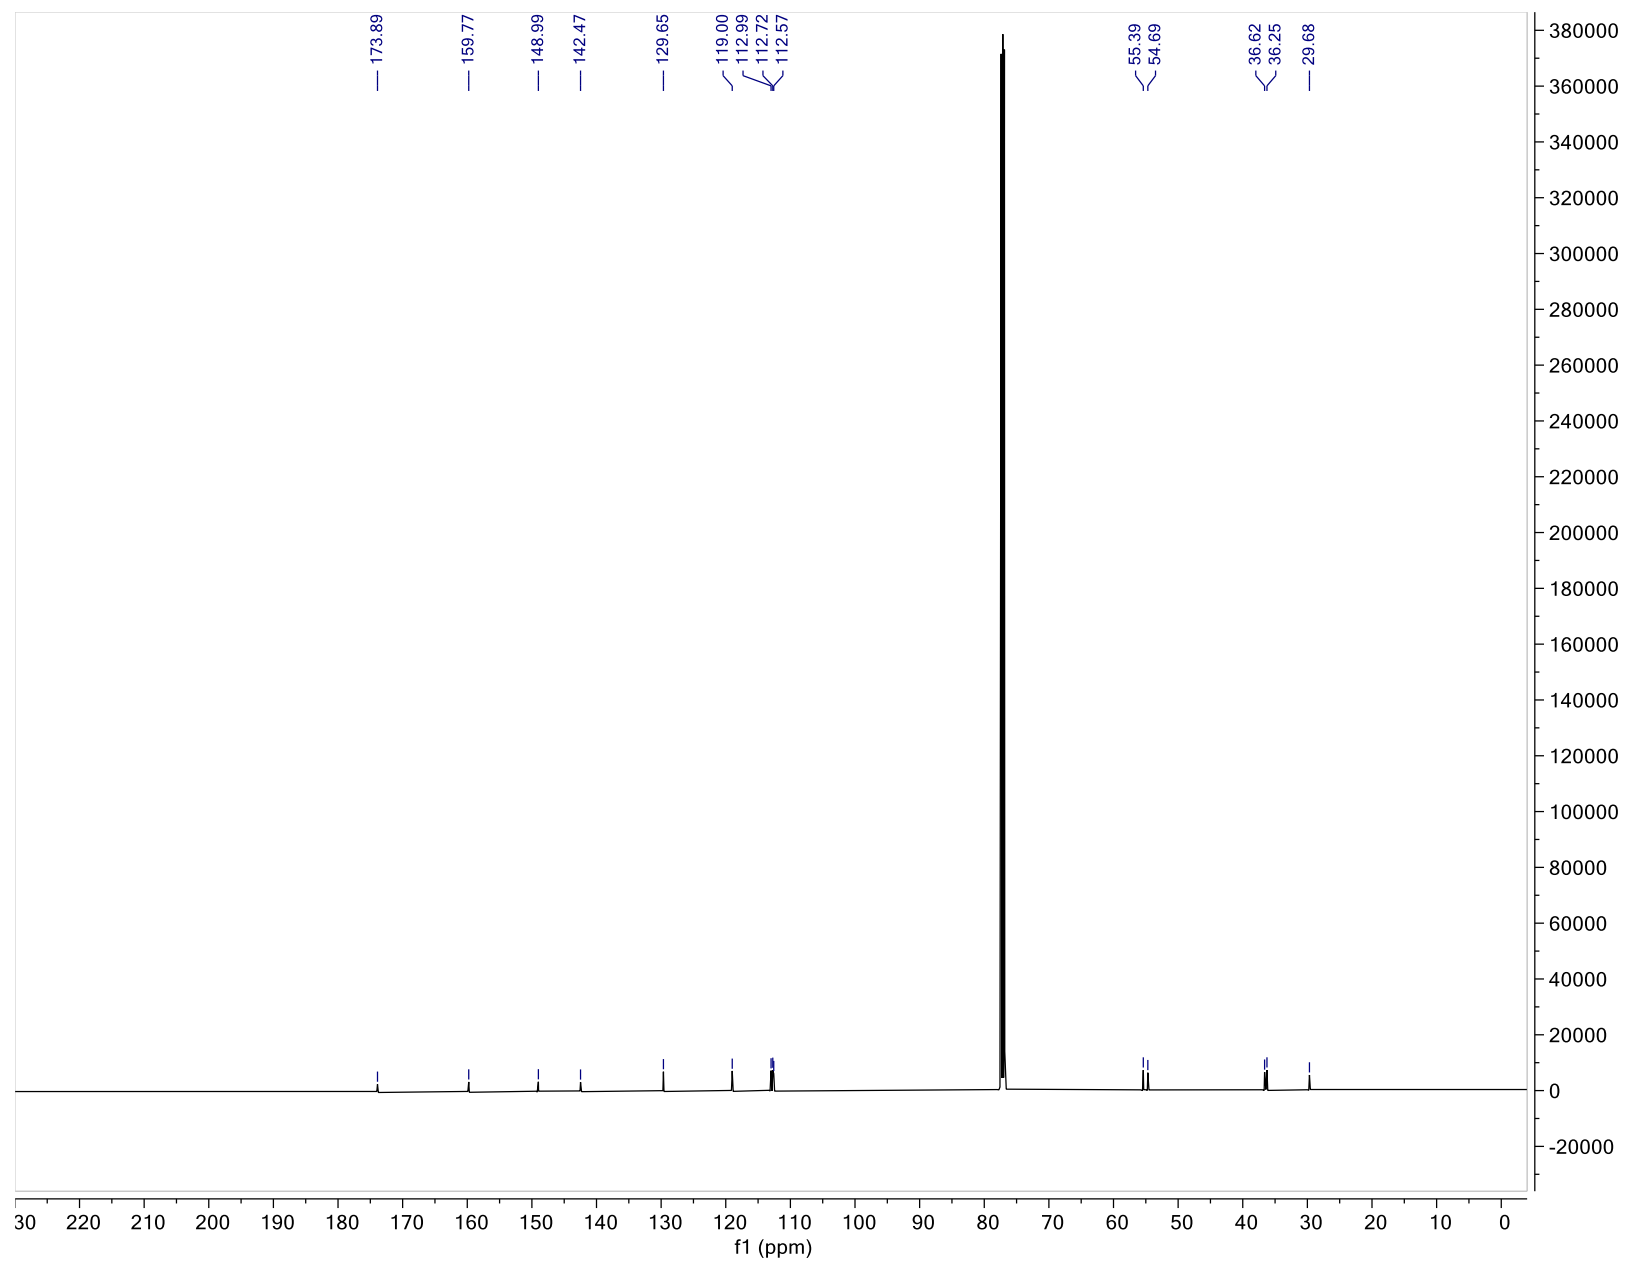

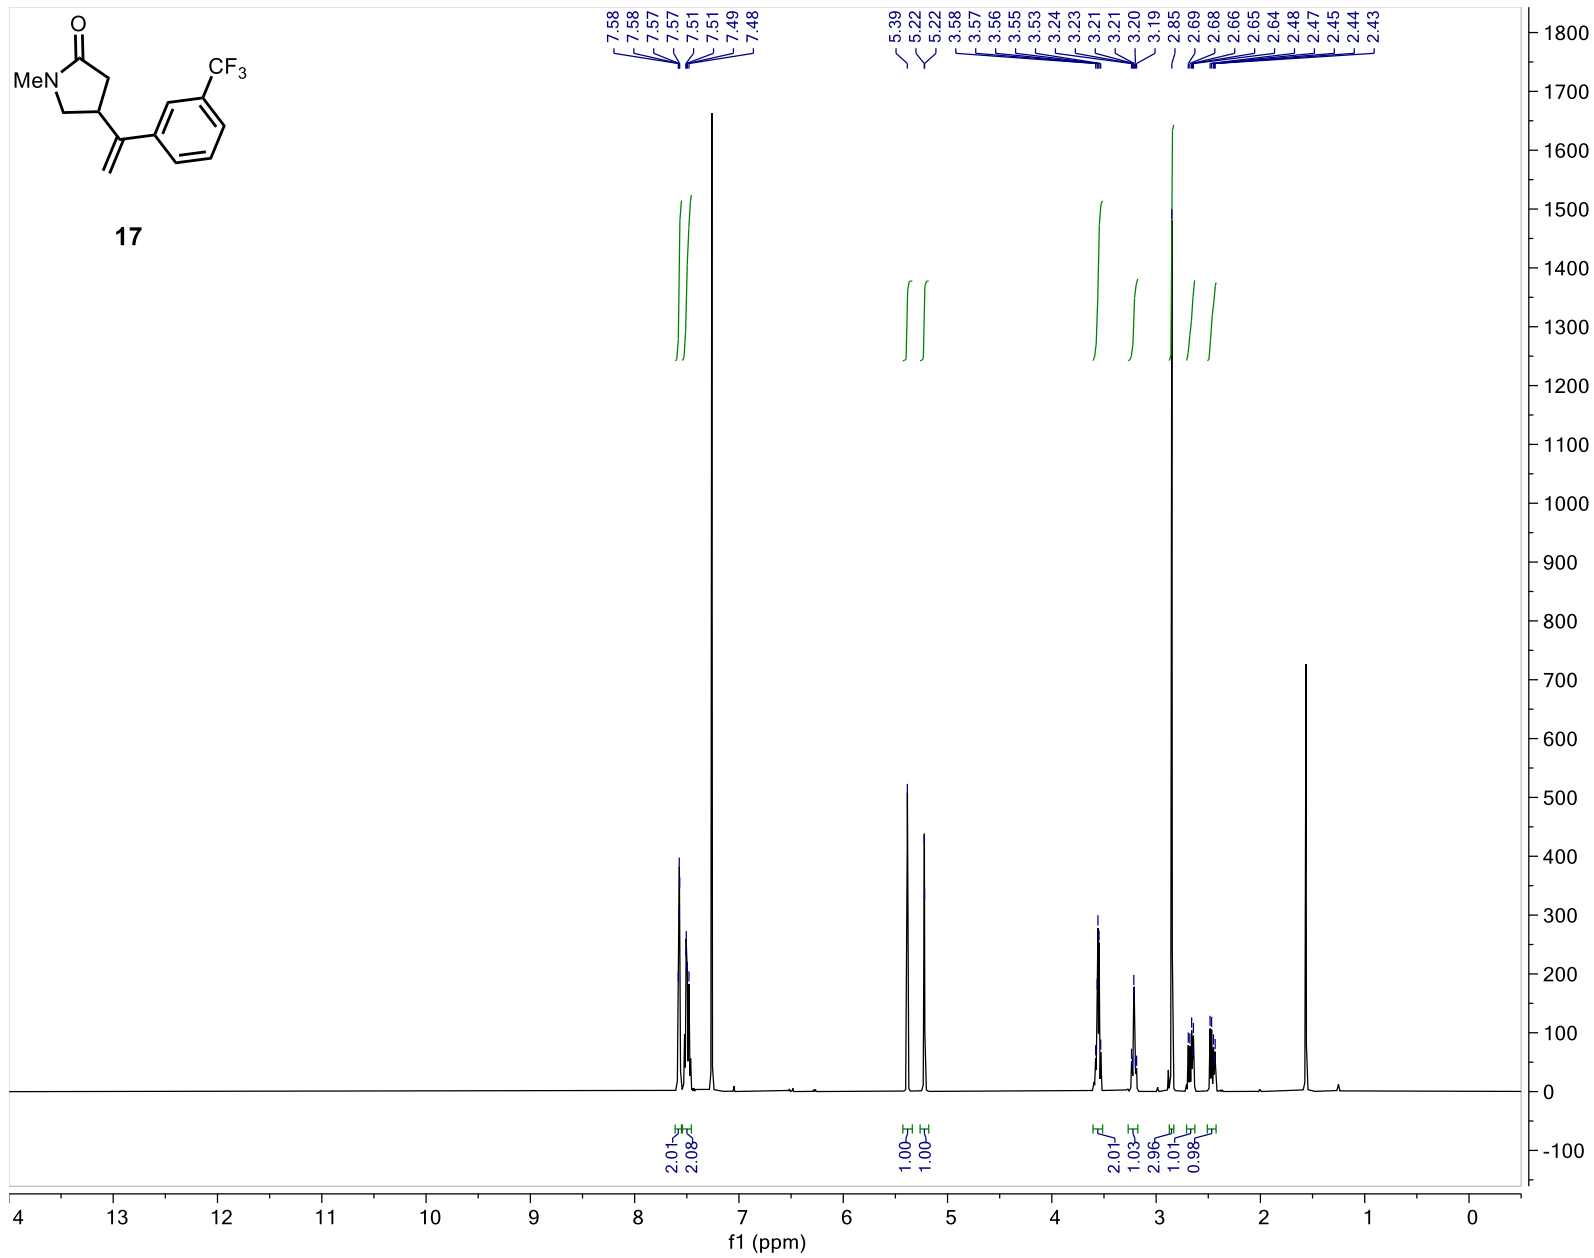

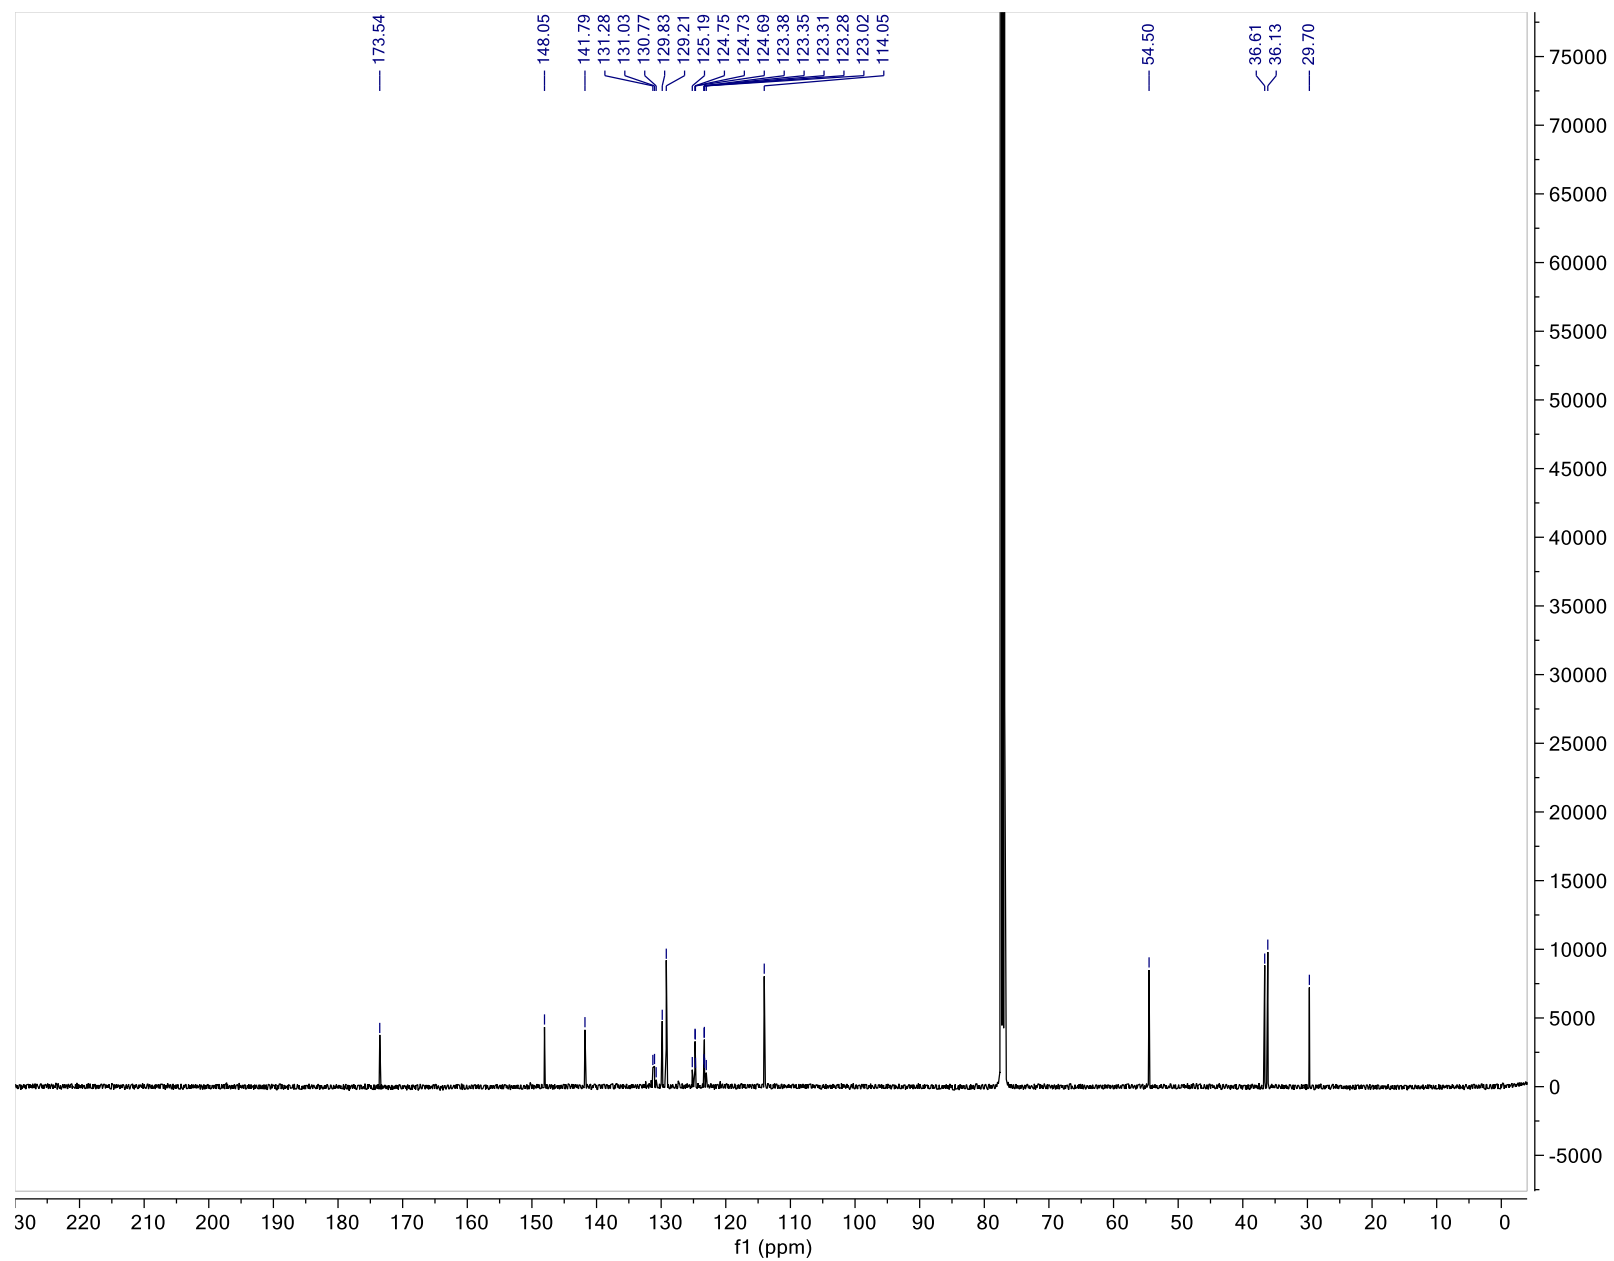

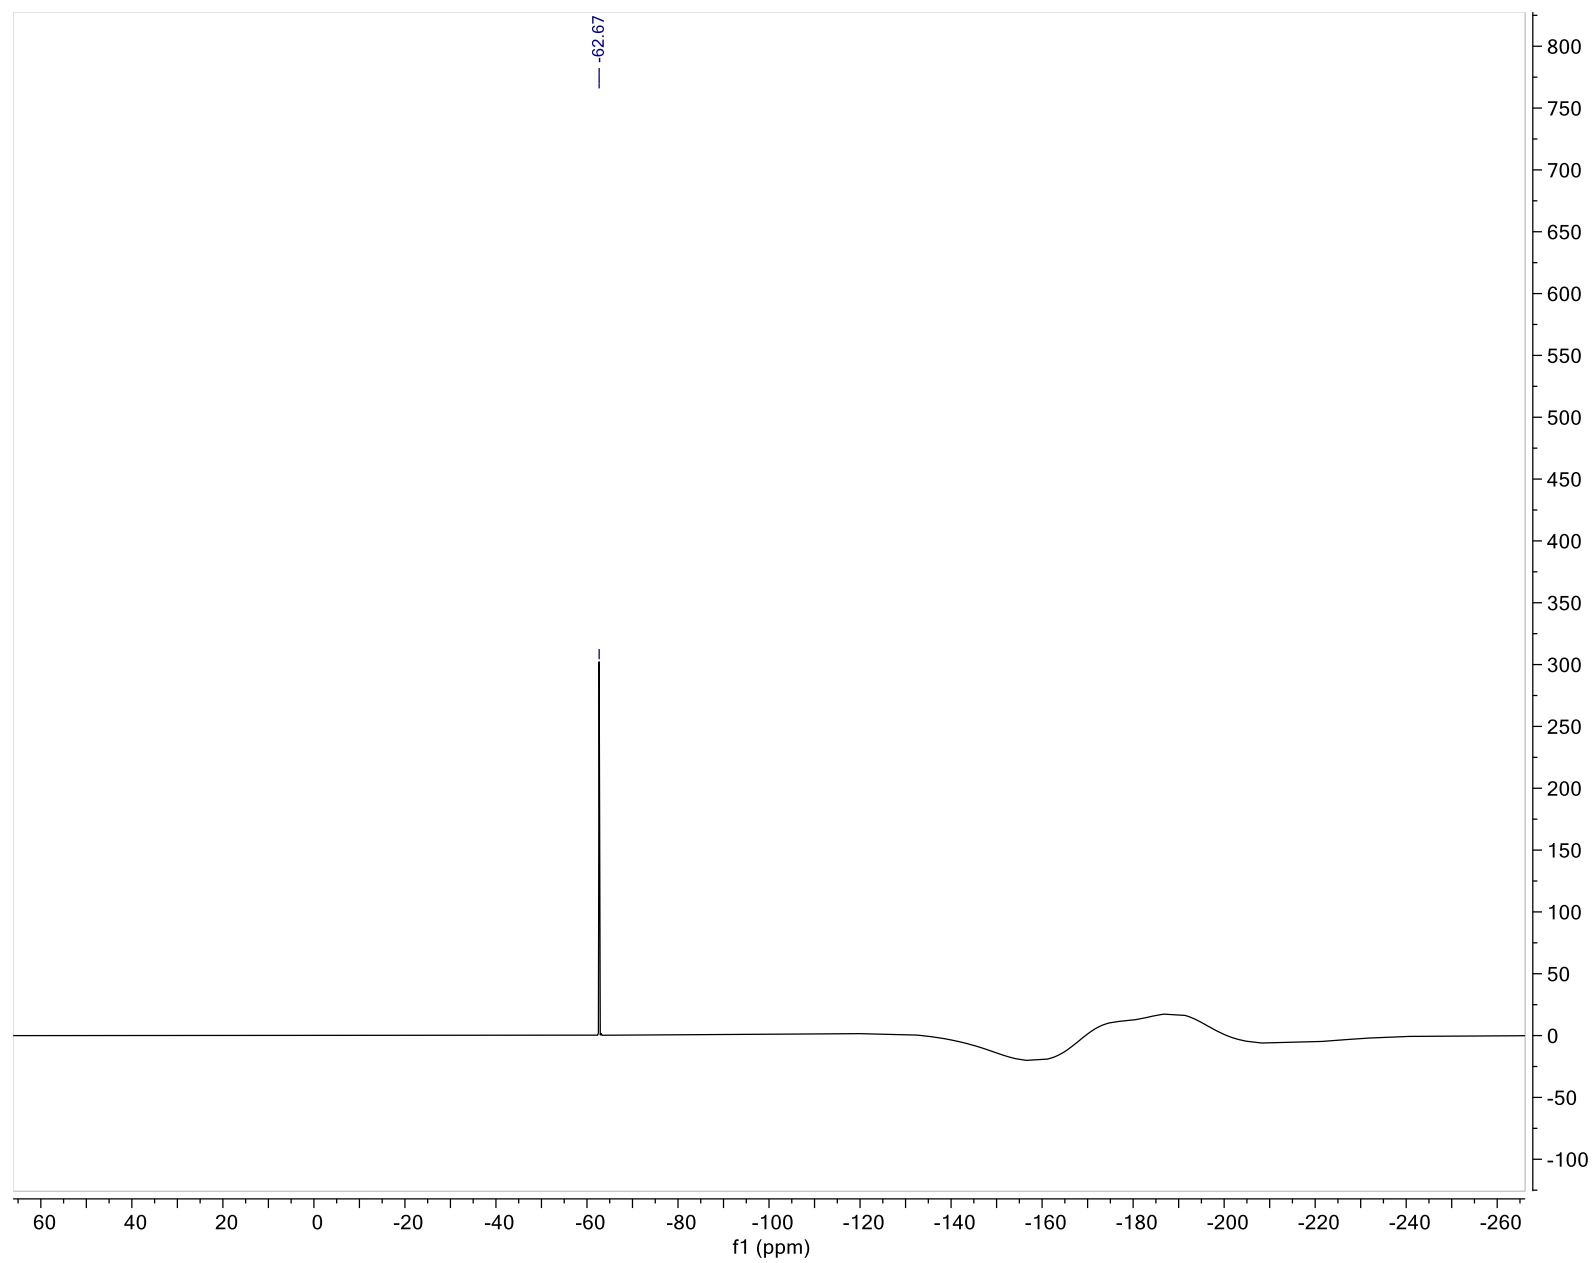

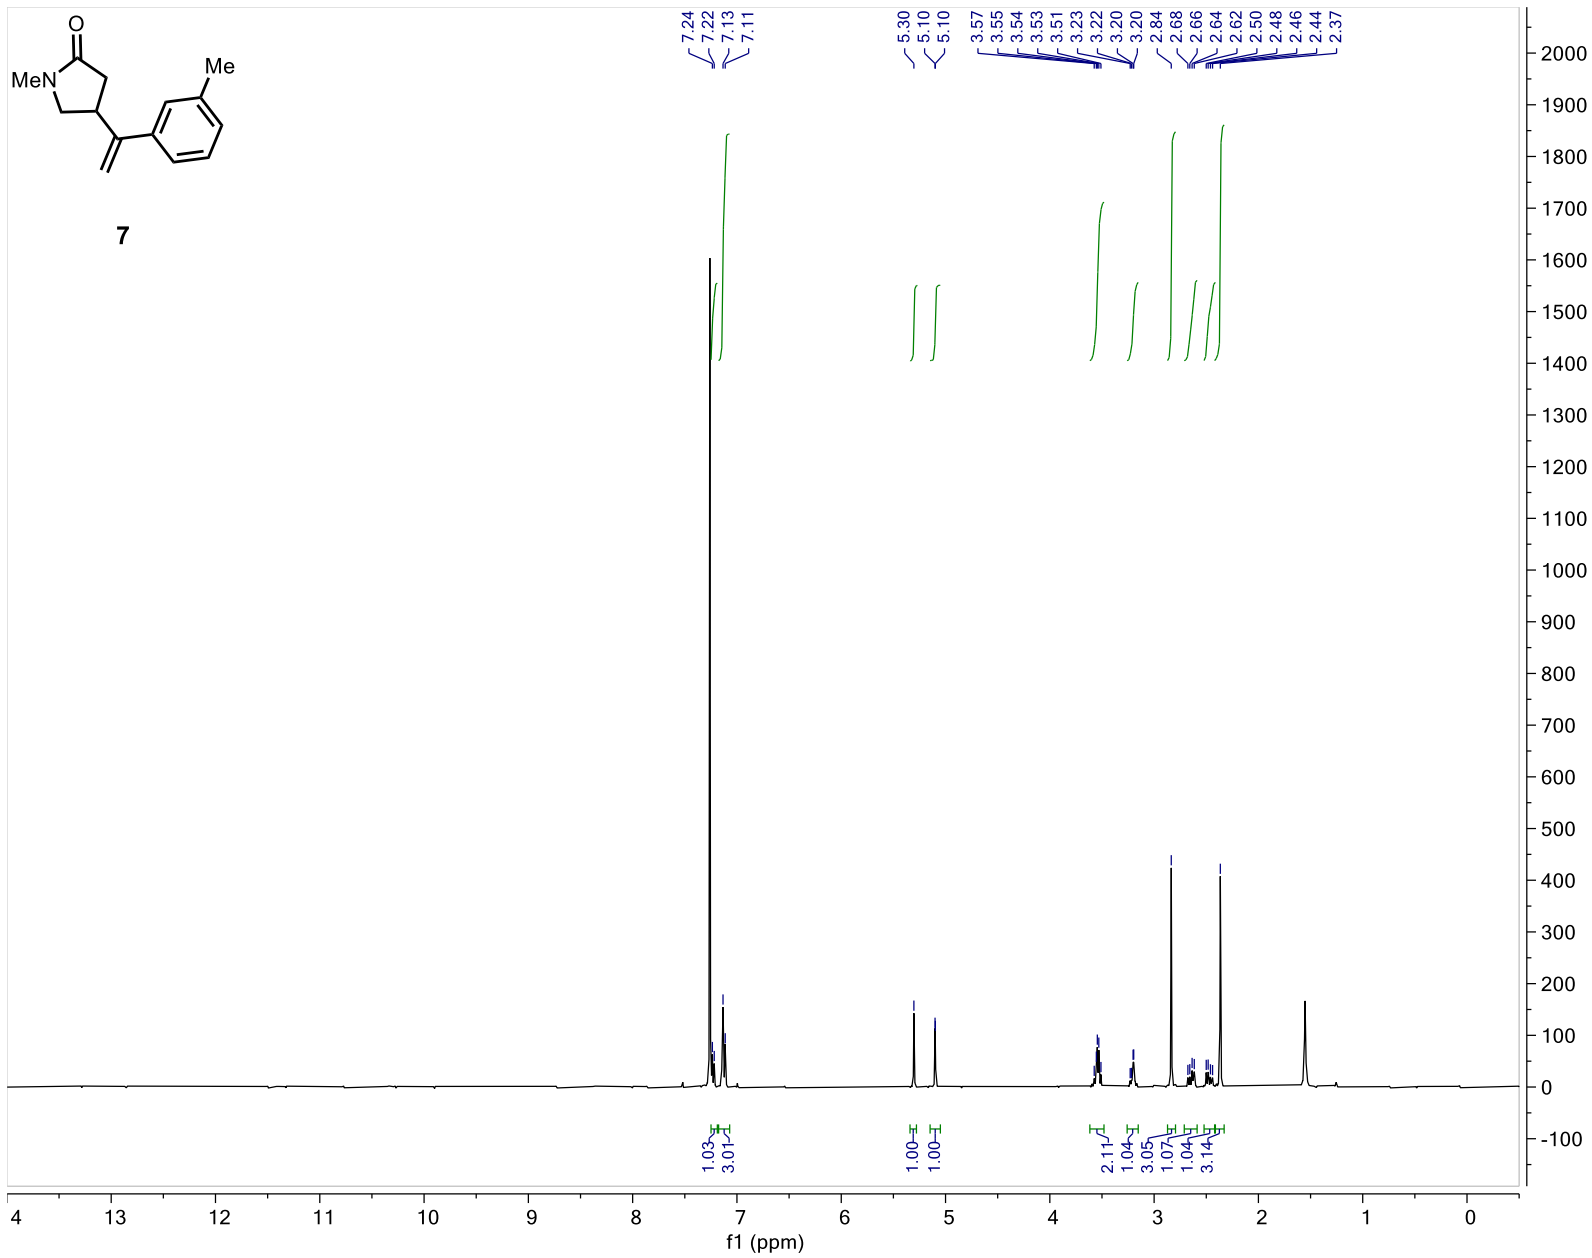

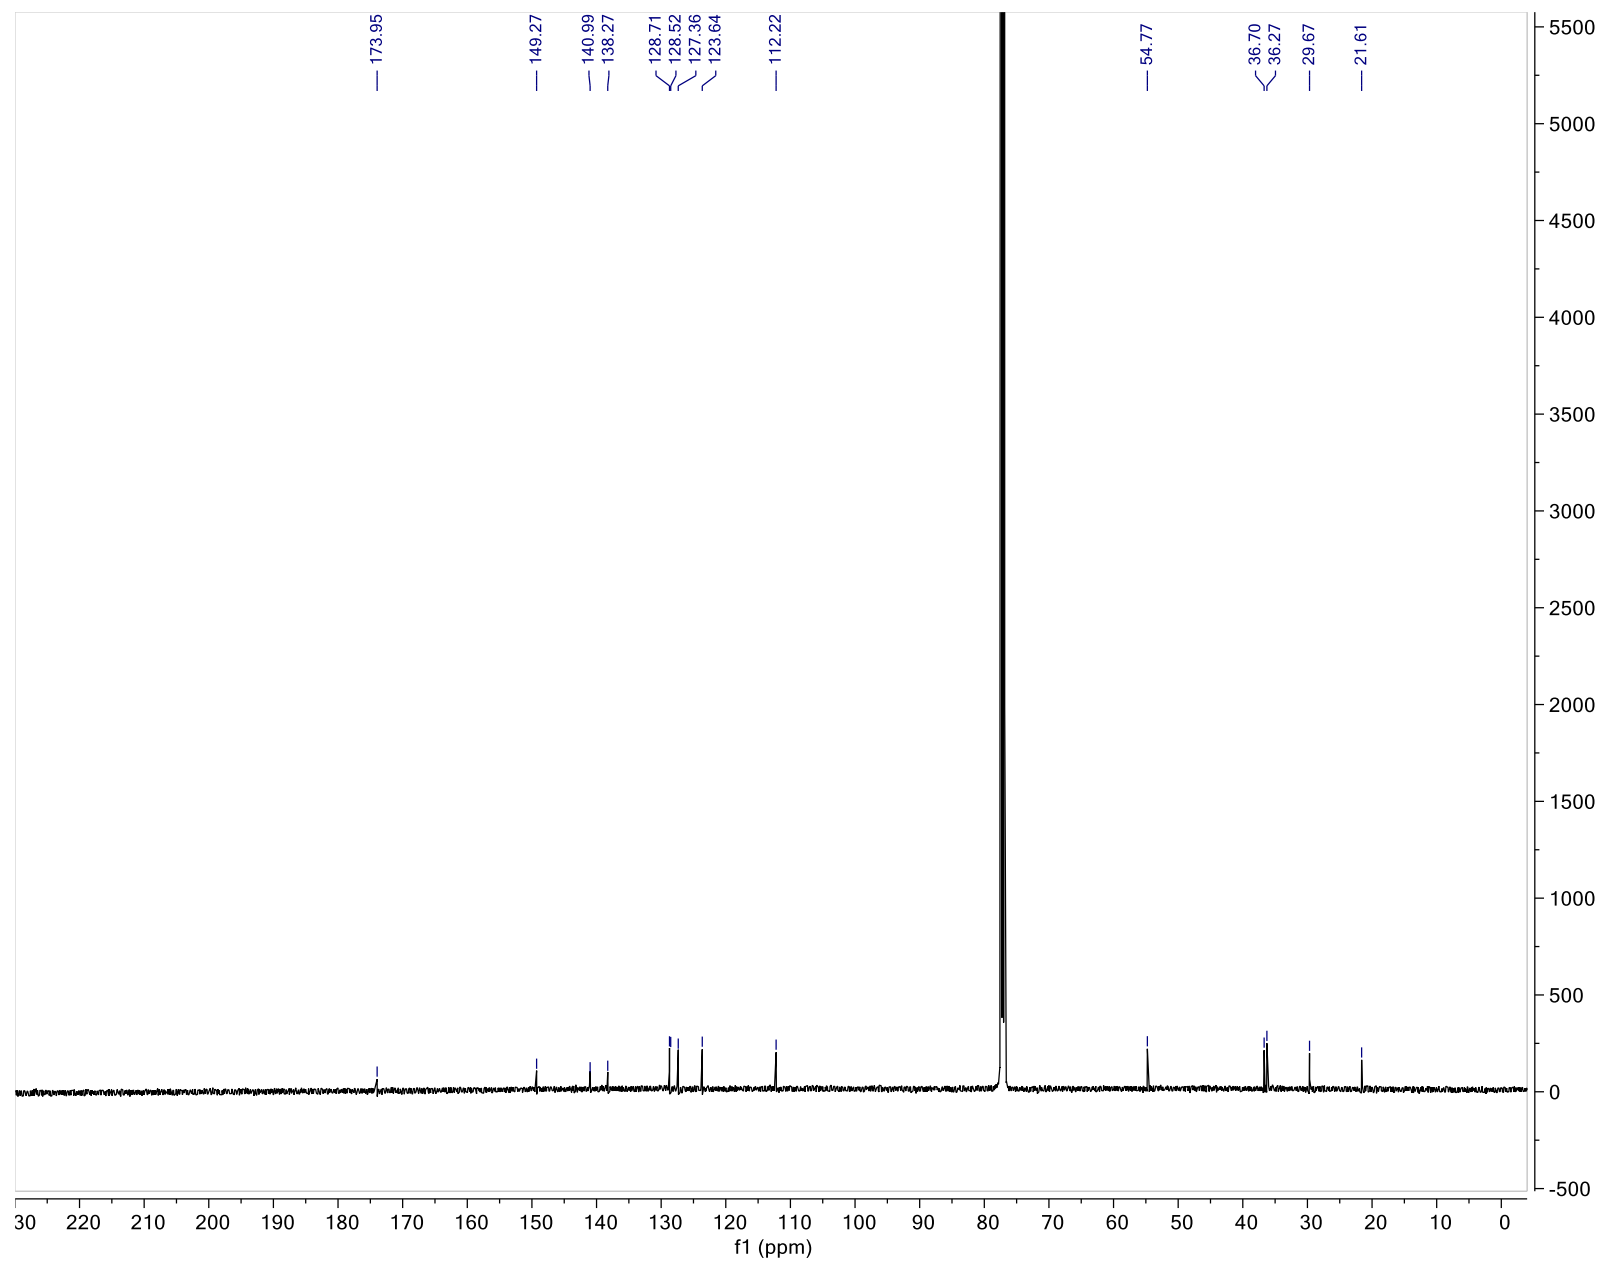

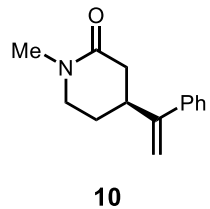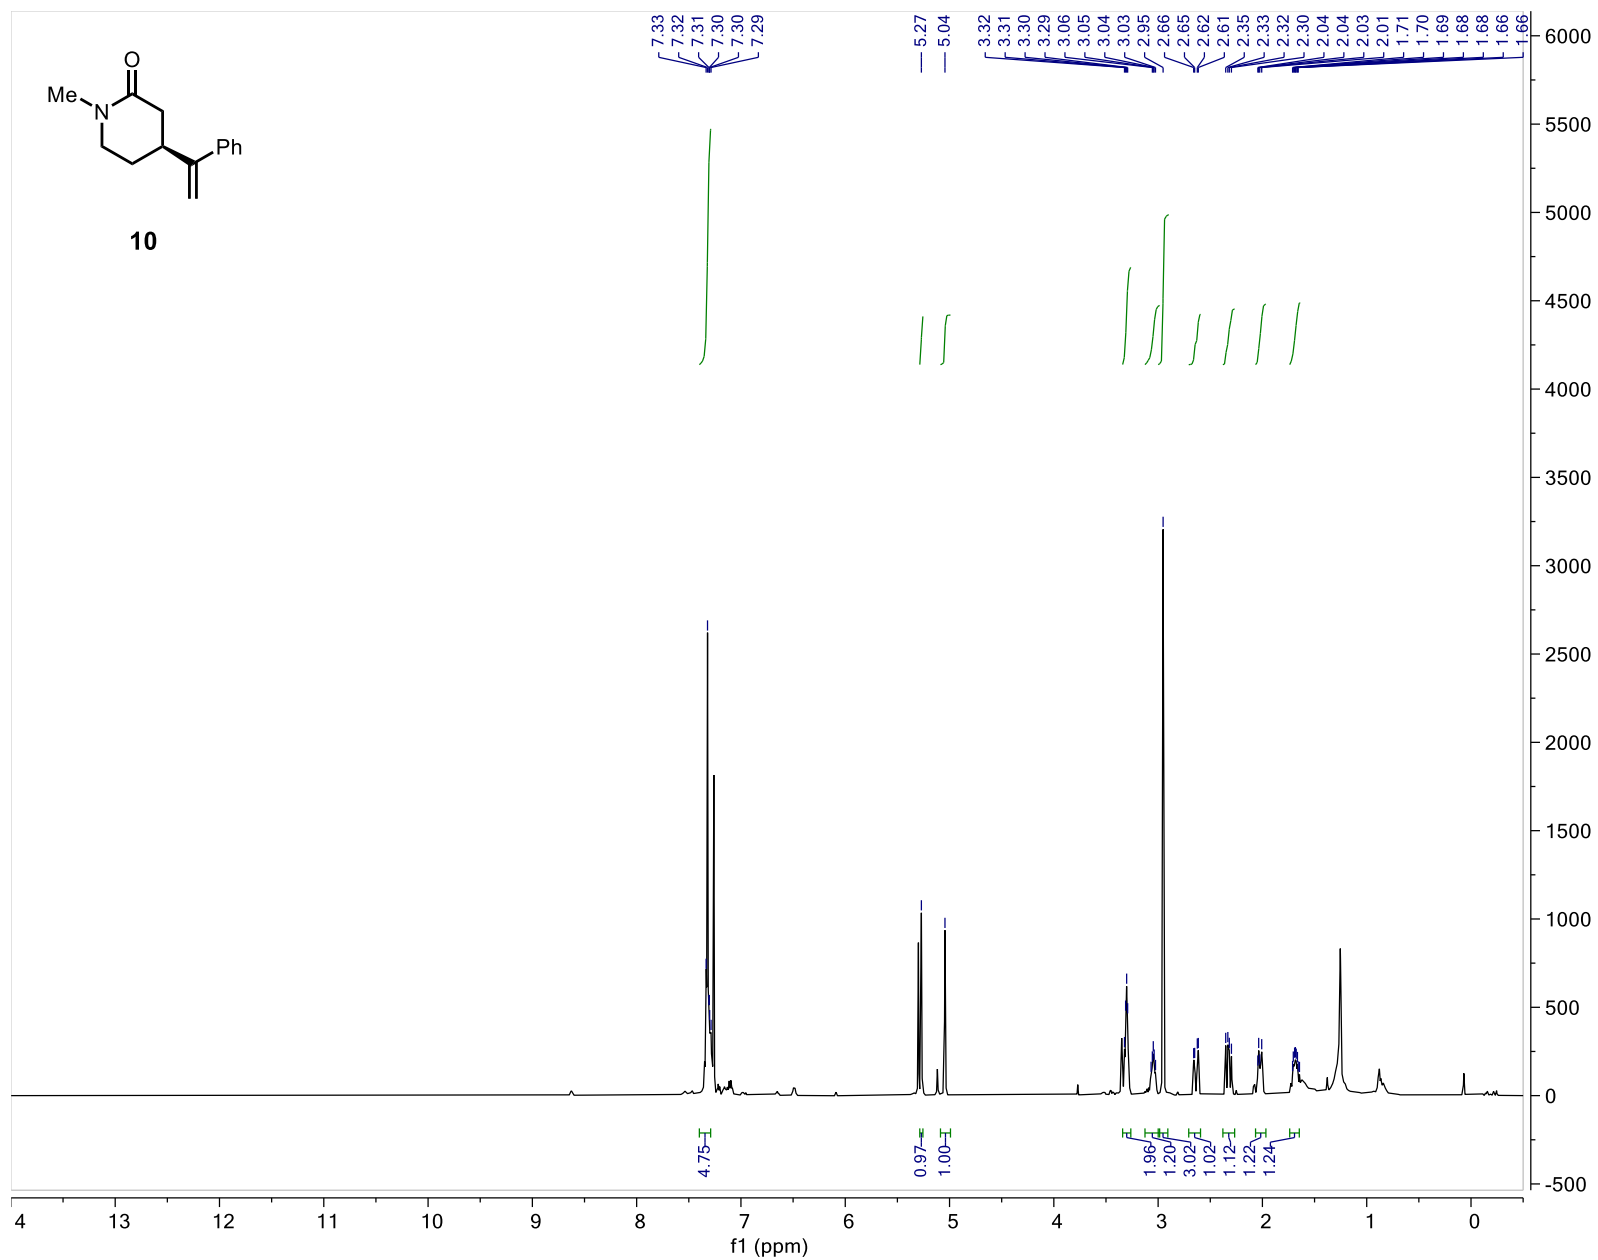

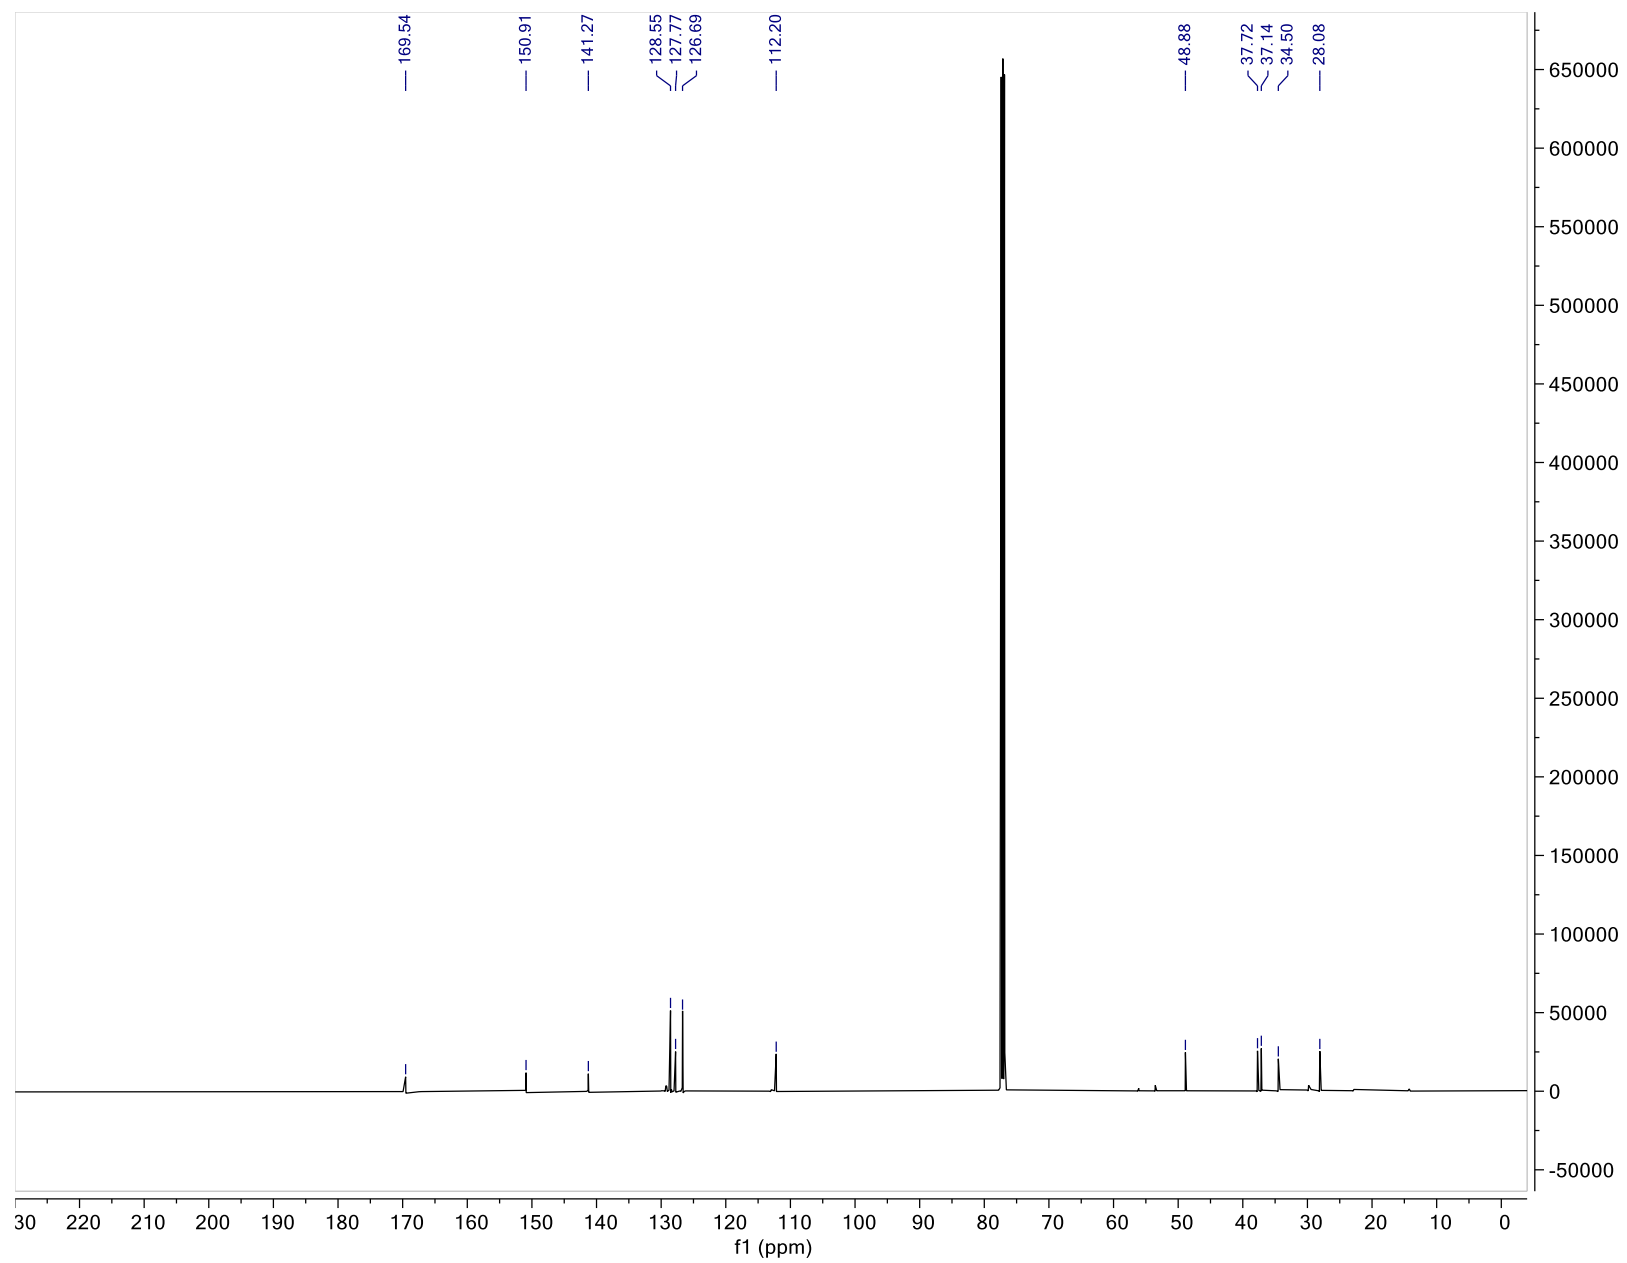

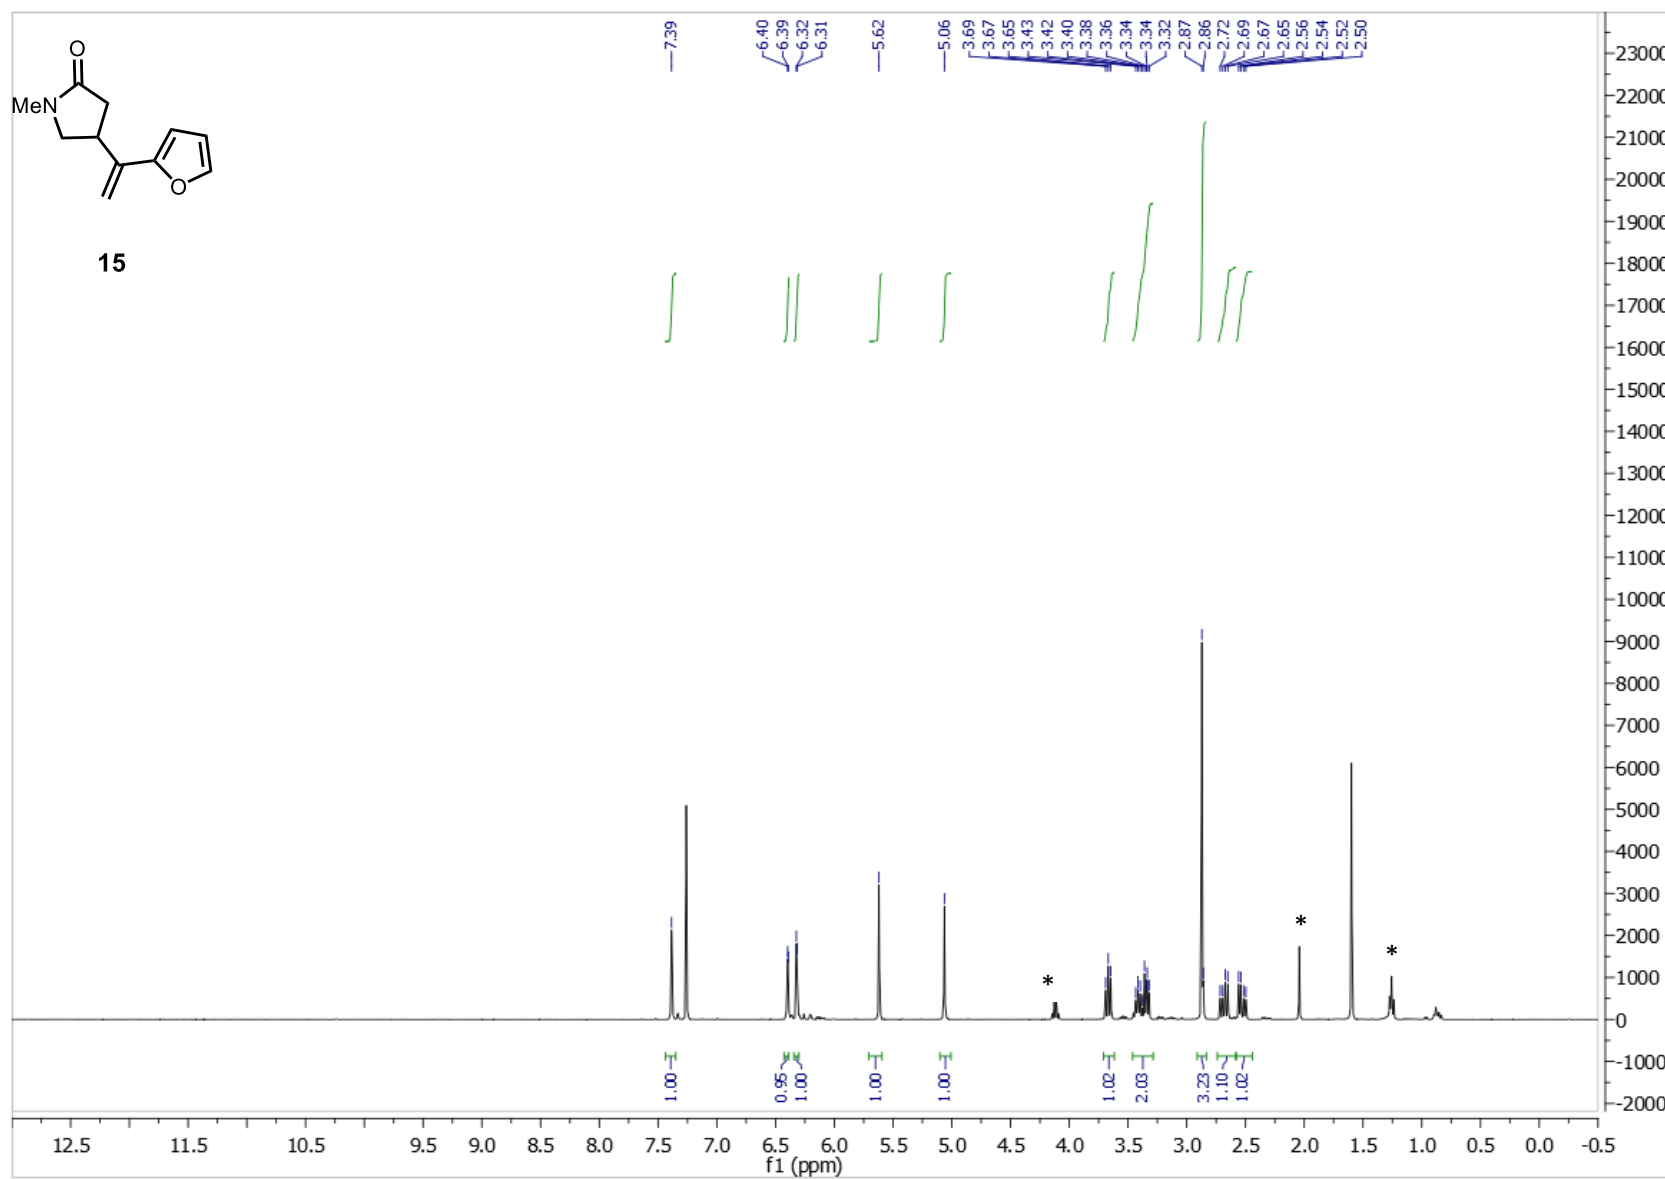

\*EtOAc

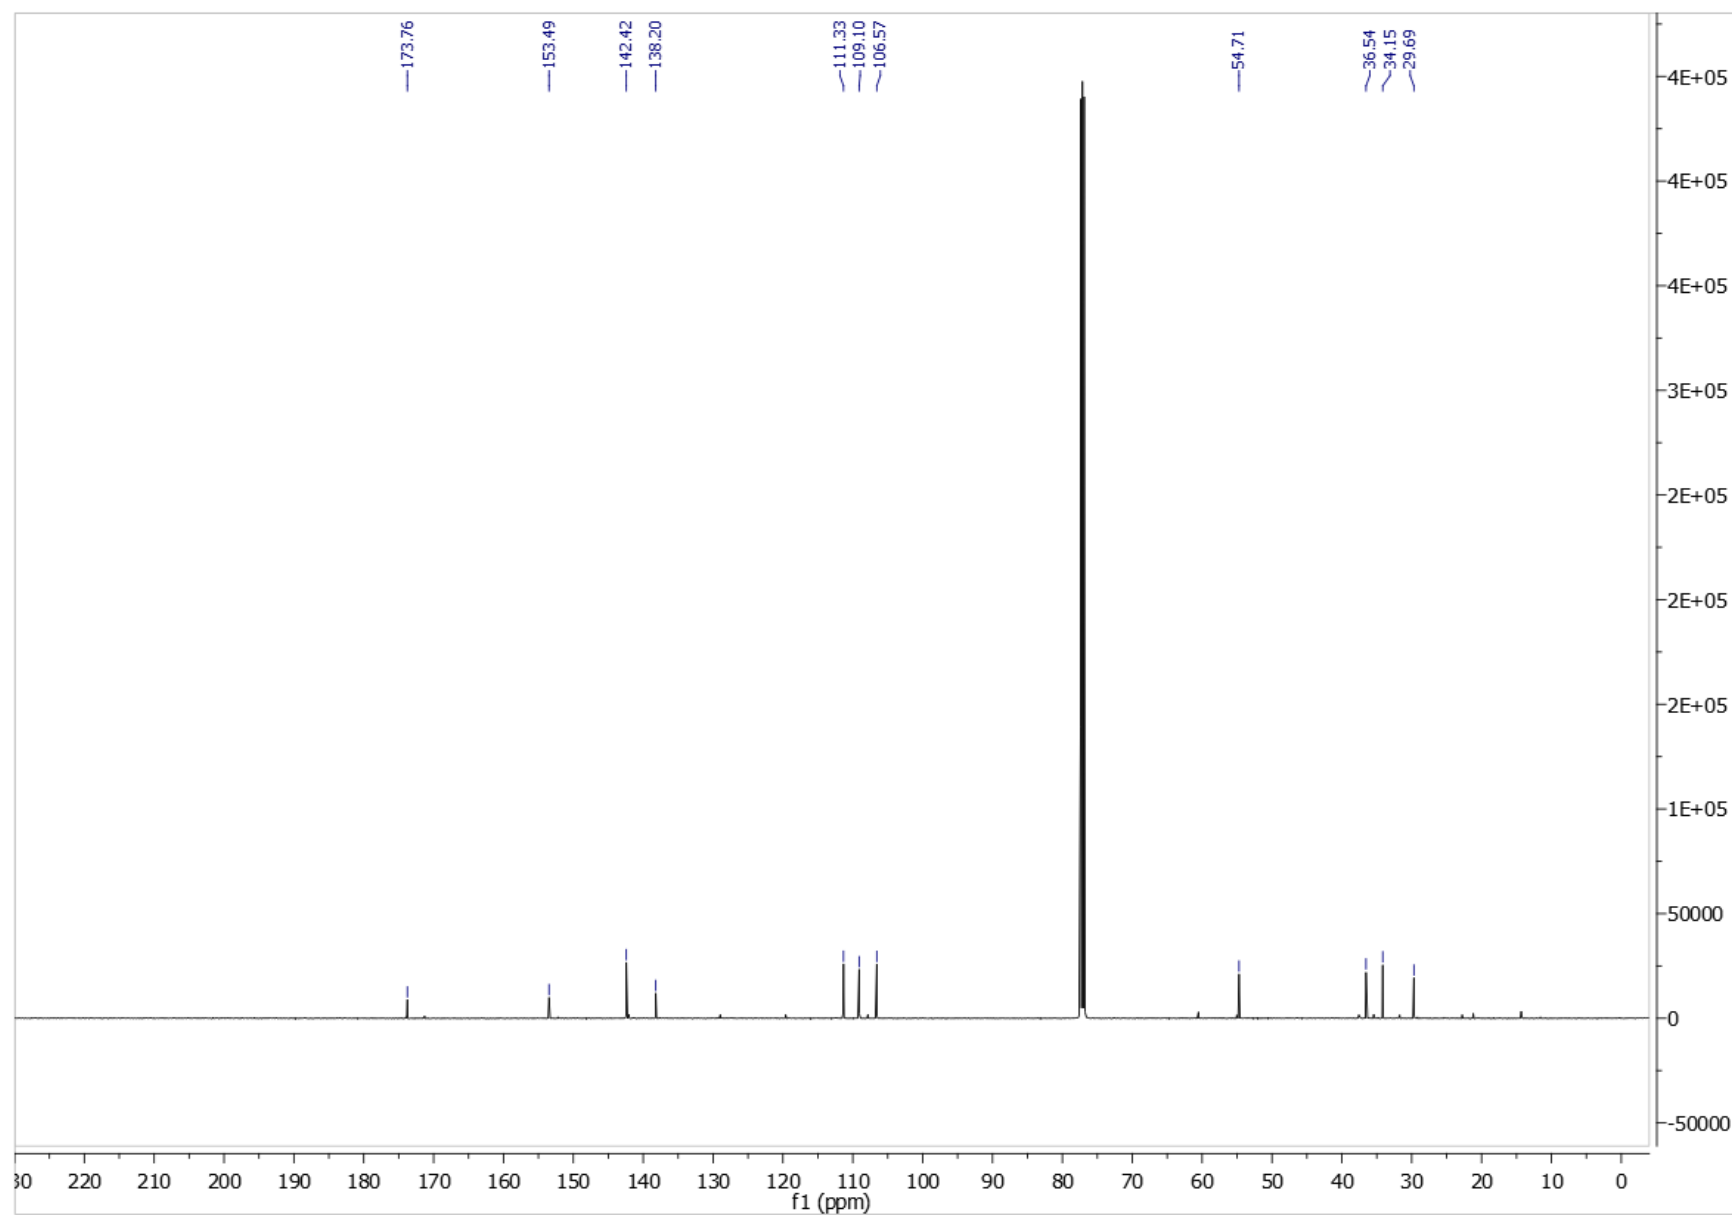

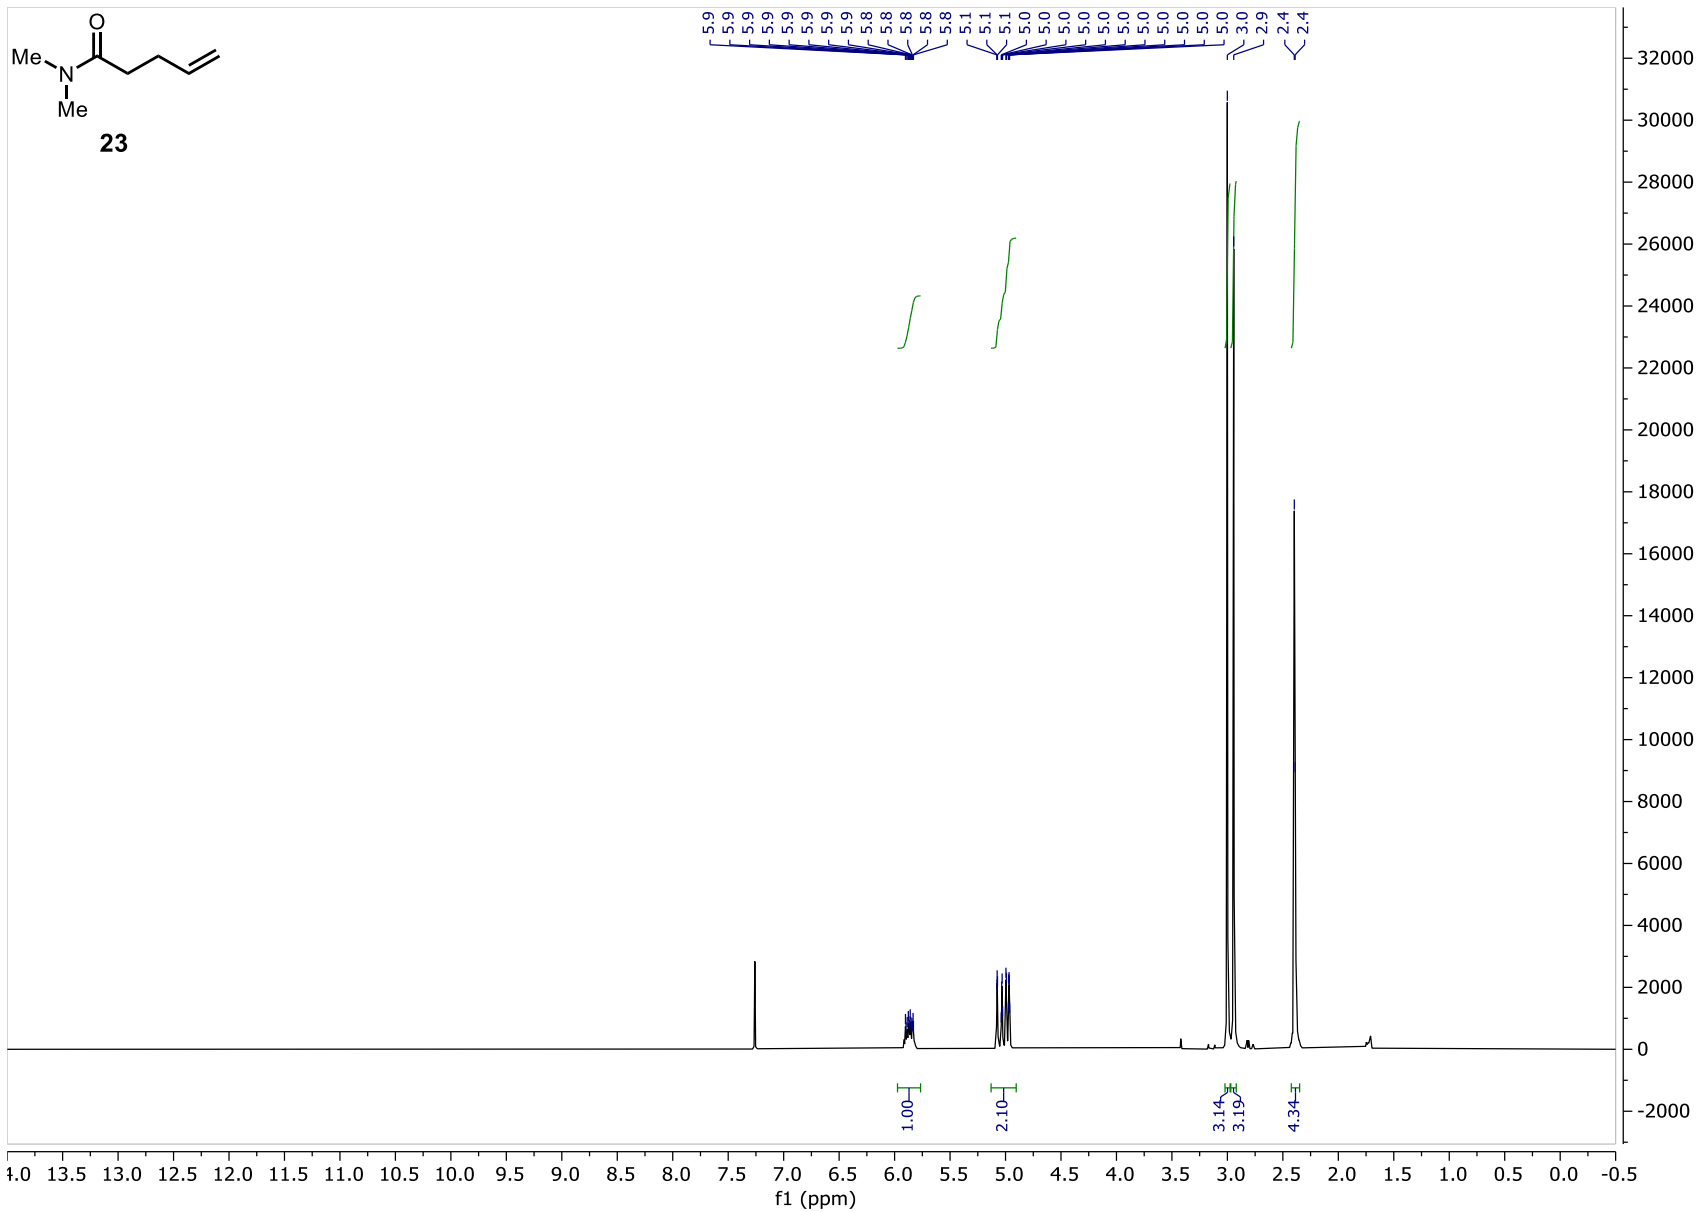

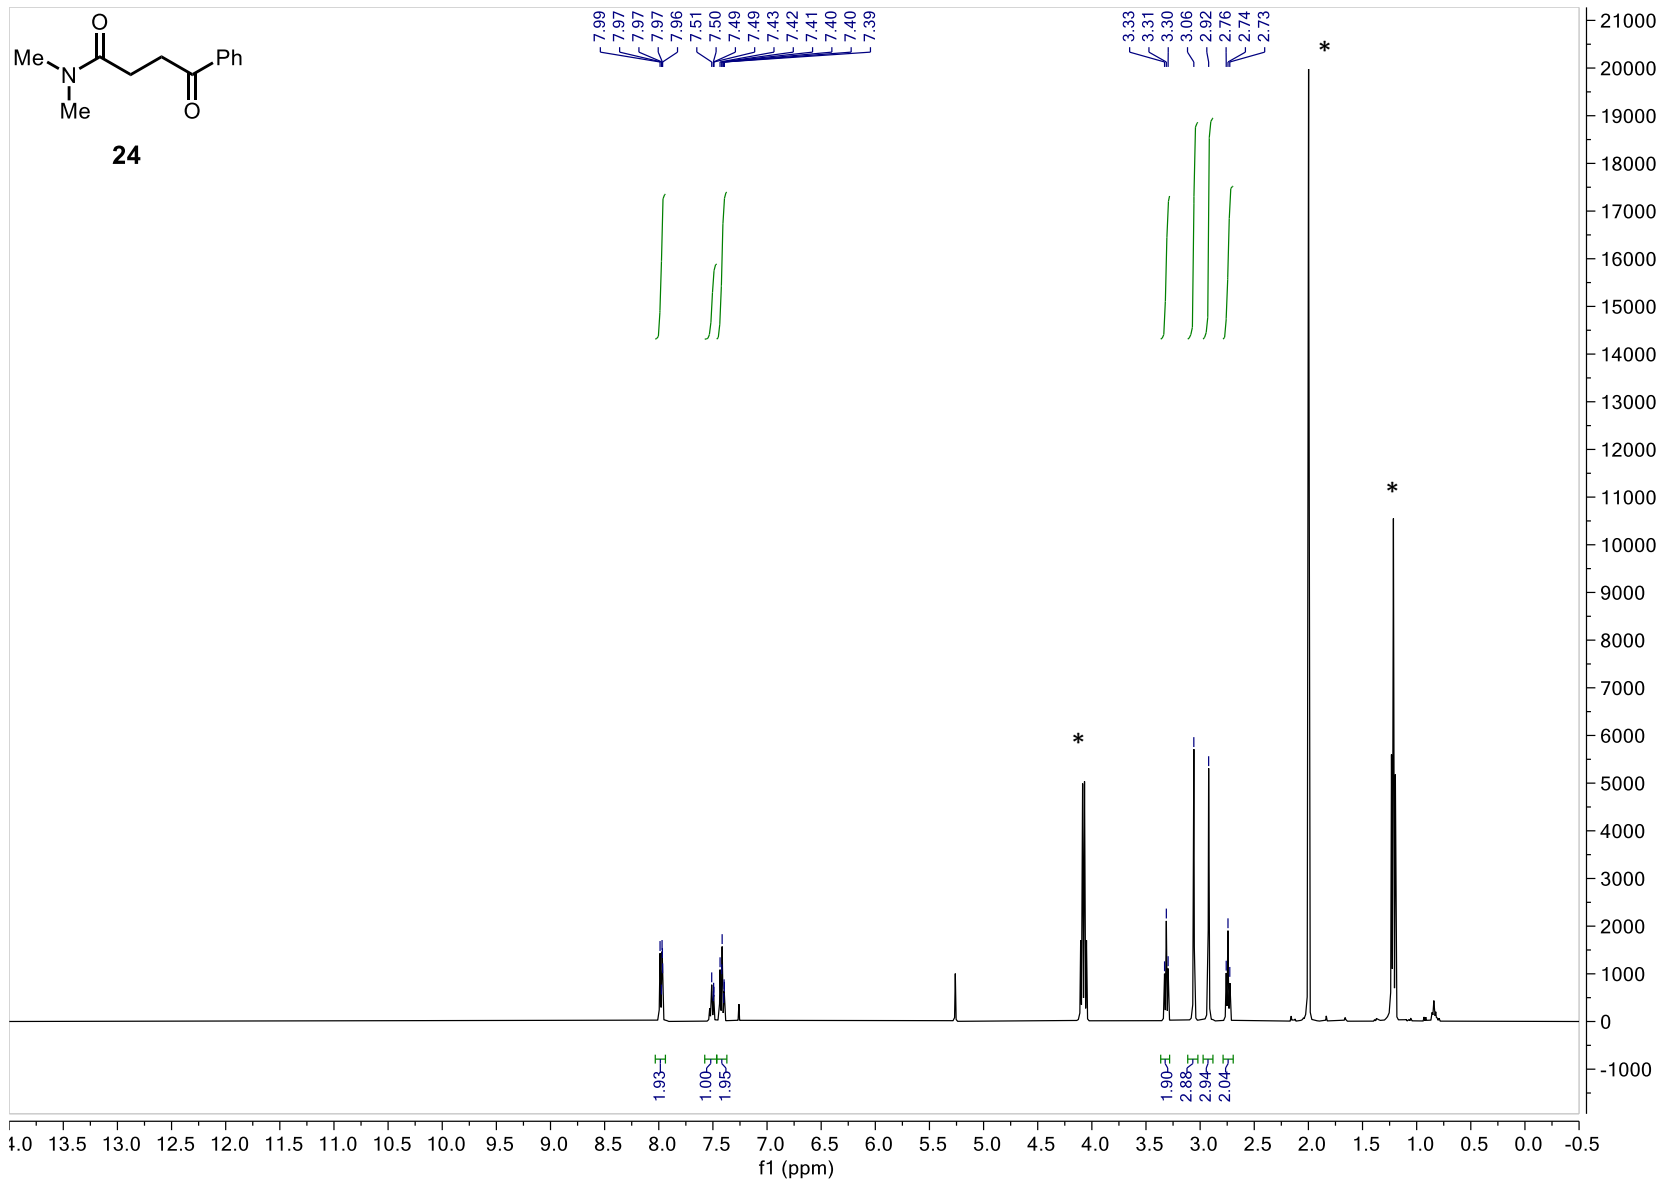

\*EtOAc

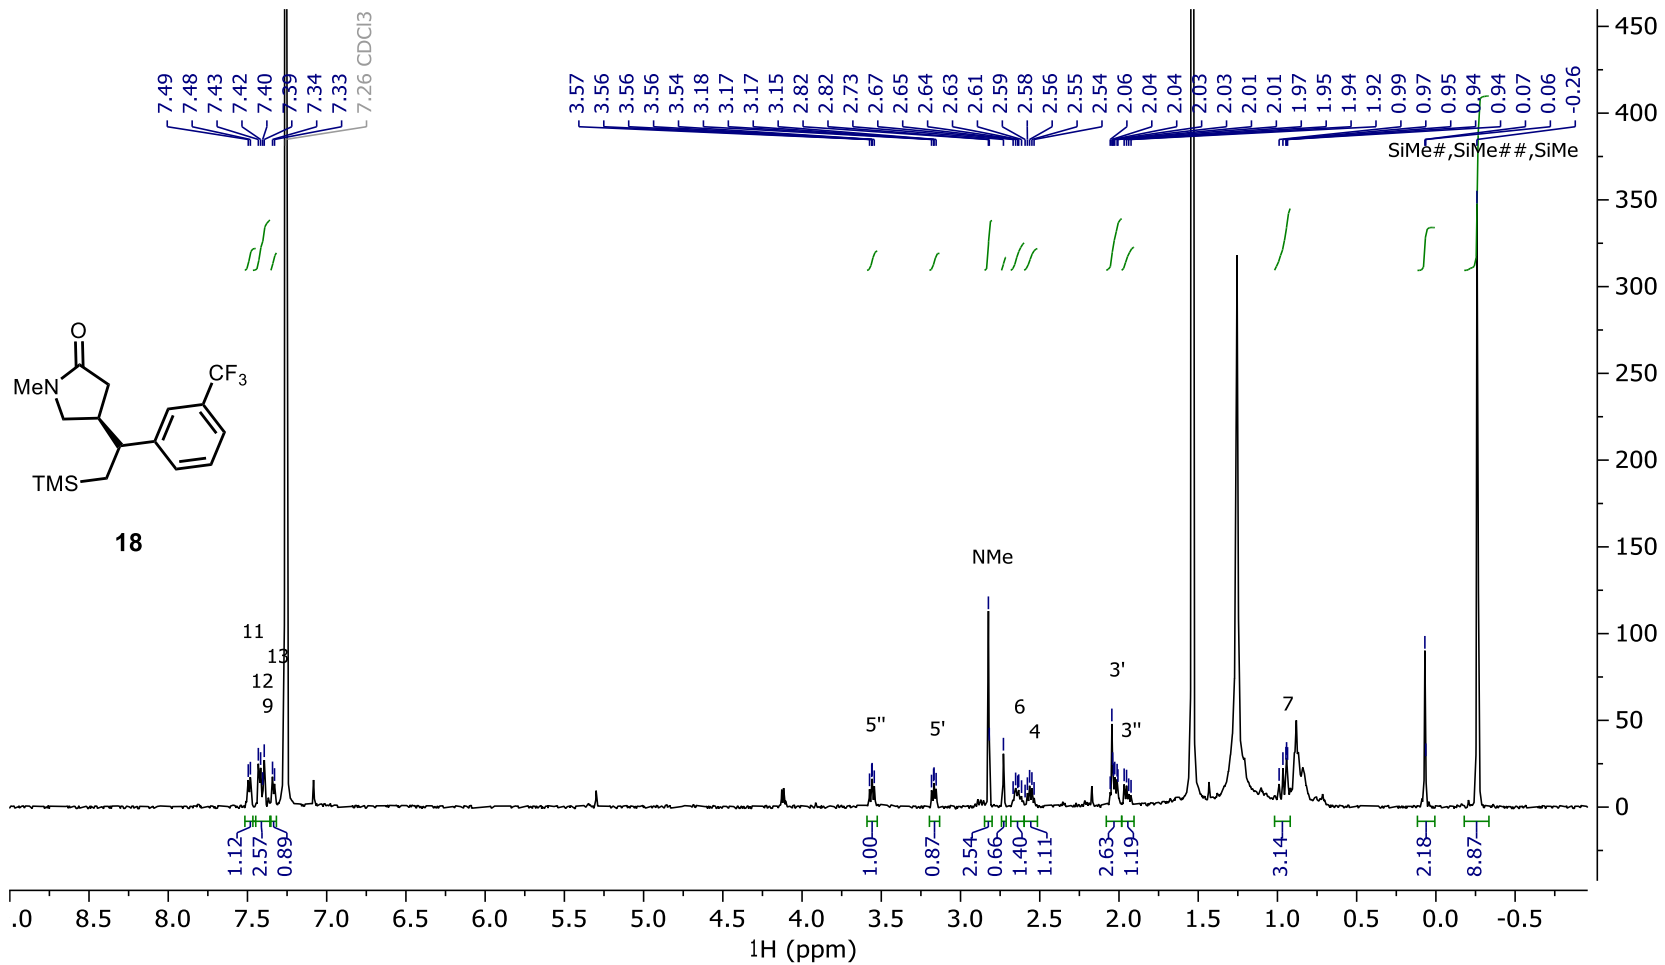

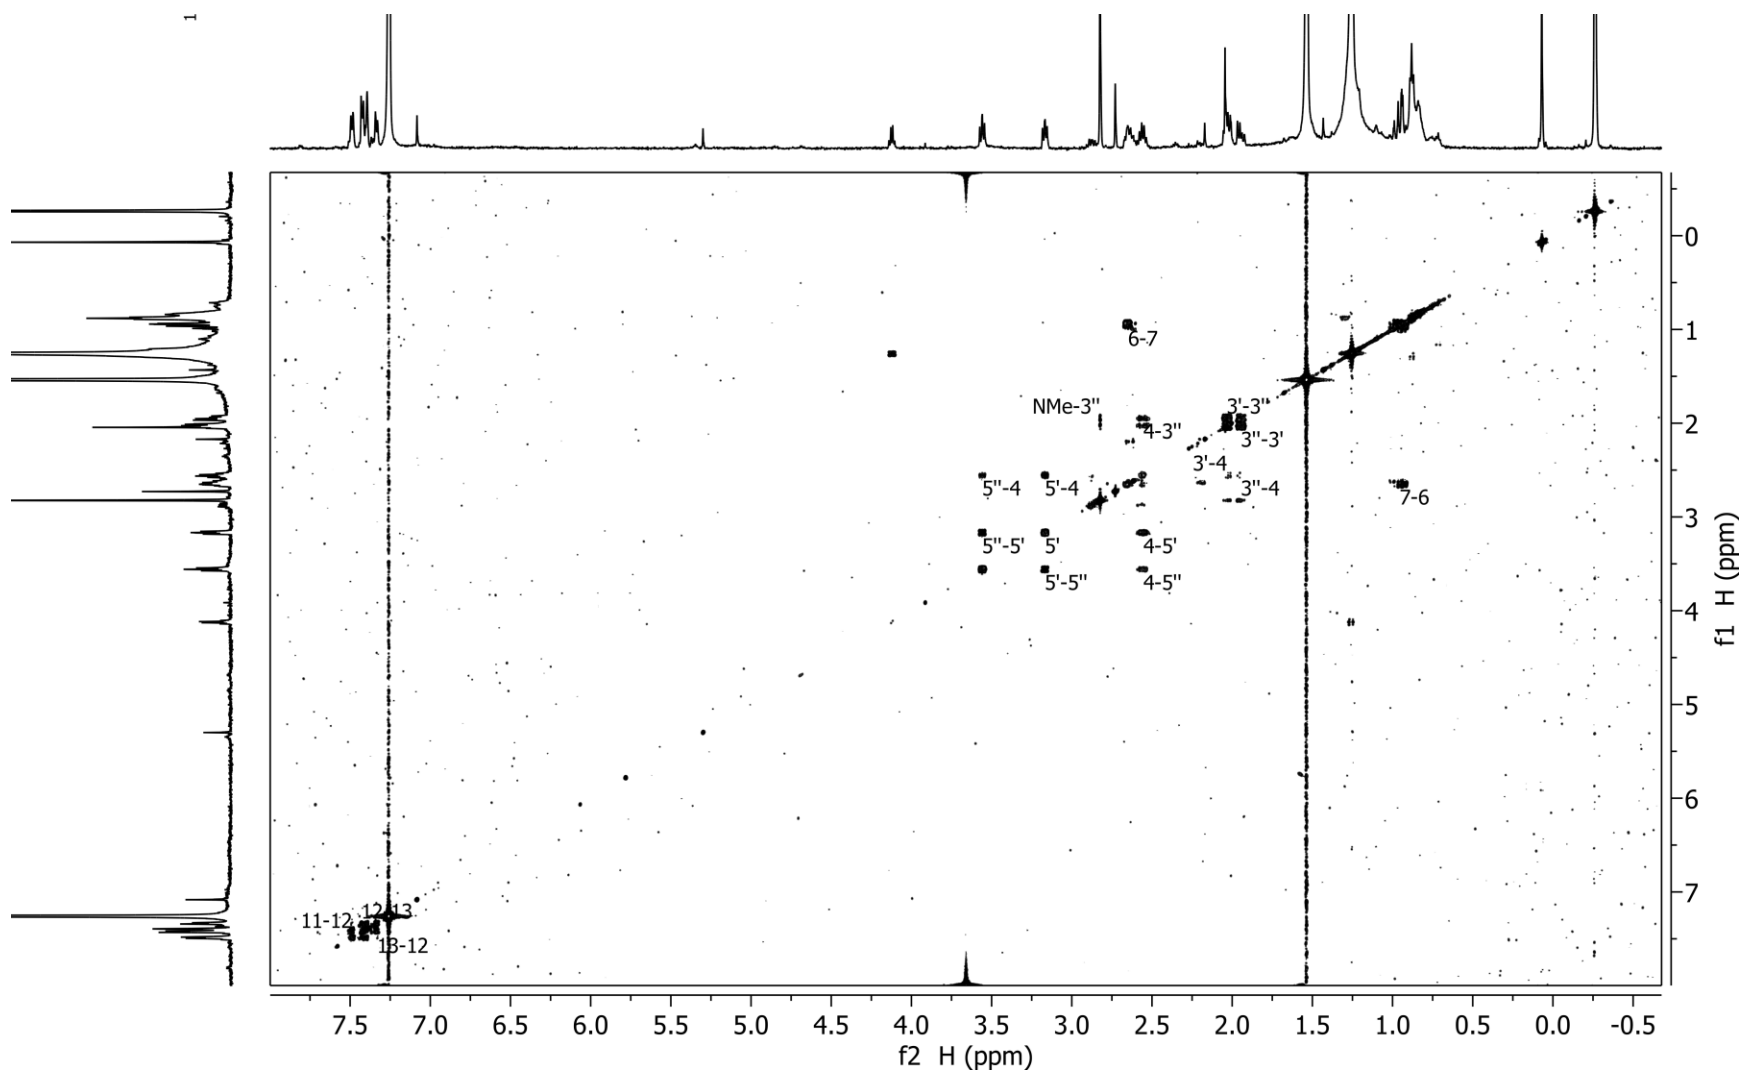

2D Gradient-selected COSY spectrum of XX acquired at 600 MHz at 25C in CDCl<sub>3</sub>. Correlations are labelled with assignments.

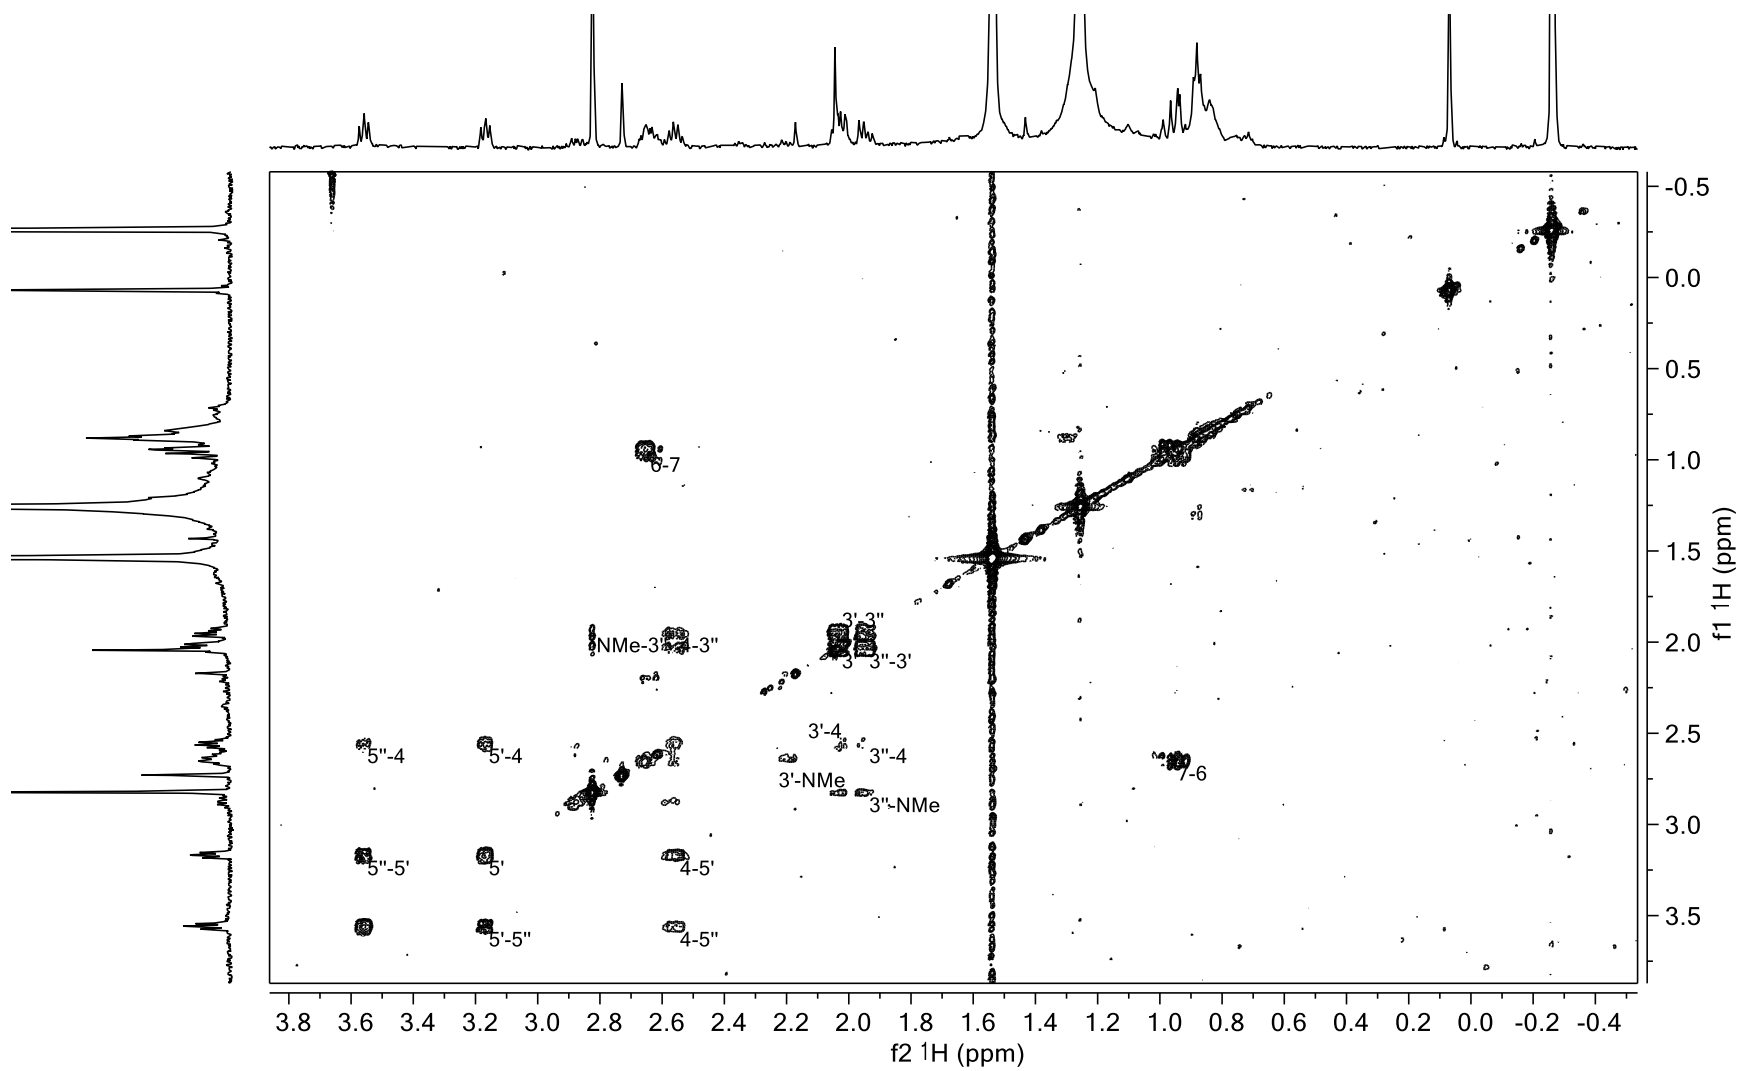

Aliphatic expansion of a 2D gradient-selected COSY spectrum of XX acquired at 600 MHz at 25C in CDCl<sub>3</sub>. Correlations are labelled with assignments.

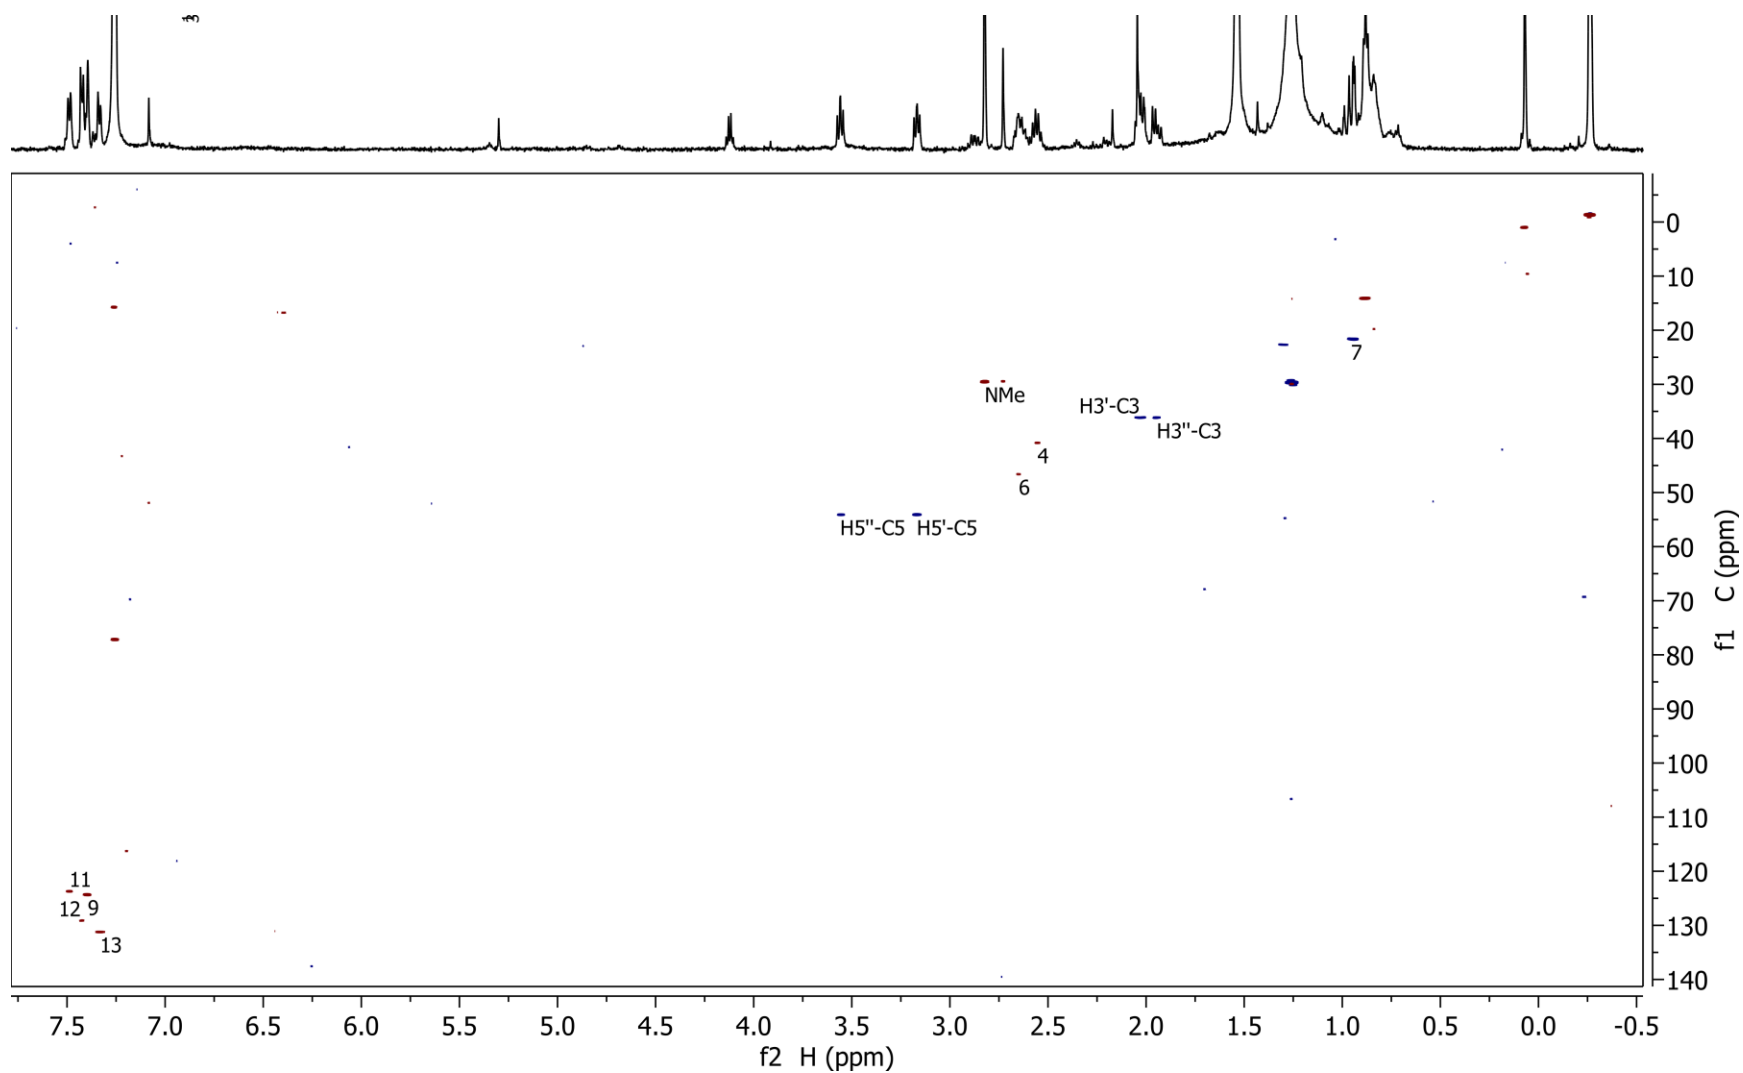

2D Multiplicity-edited  $^1\text{H}\{^{13}\text{C}\}$  HSQC spectrum of XX acquired at 600 MHz at 25°C in  $\text{CDCl}_3$ . Red contours represent CH and  $\text{CH}_3$  and blue contours represent  $\text{CH}_2$ 's. Numbers indicate assignments.

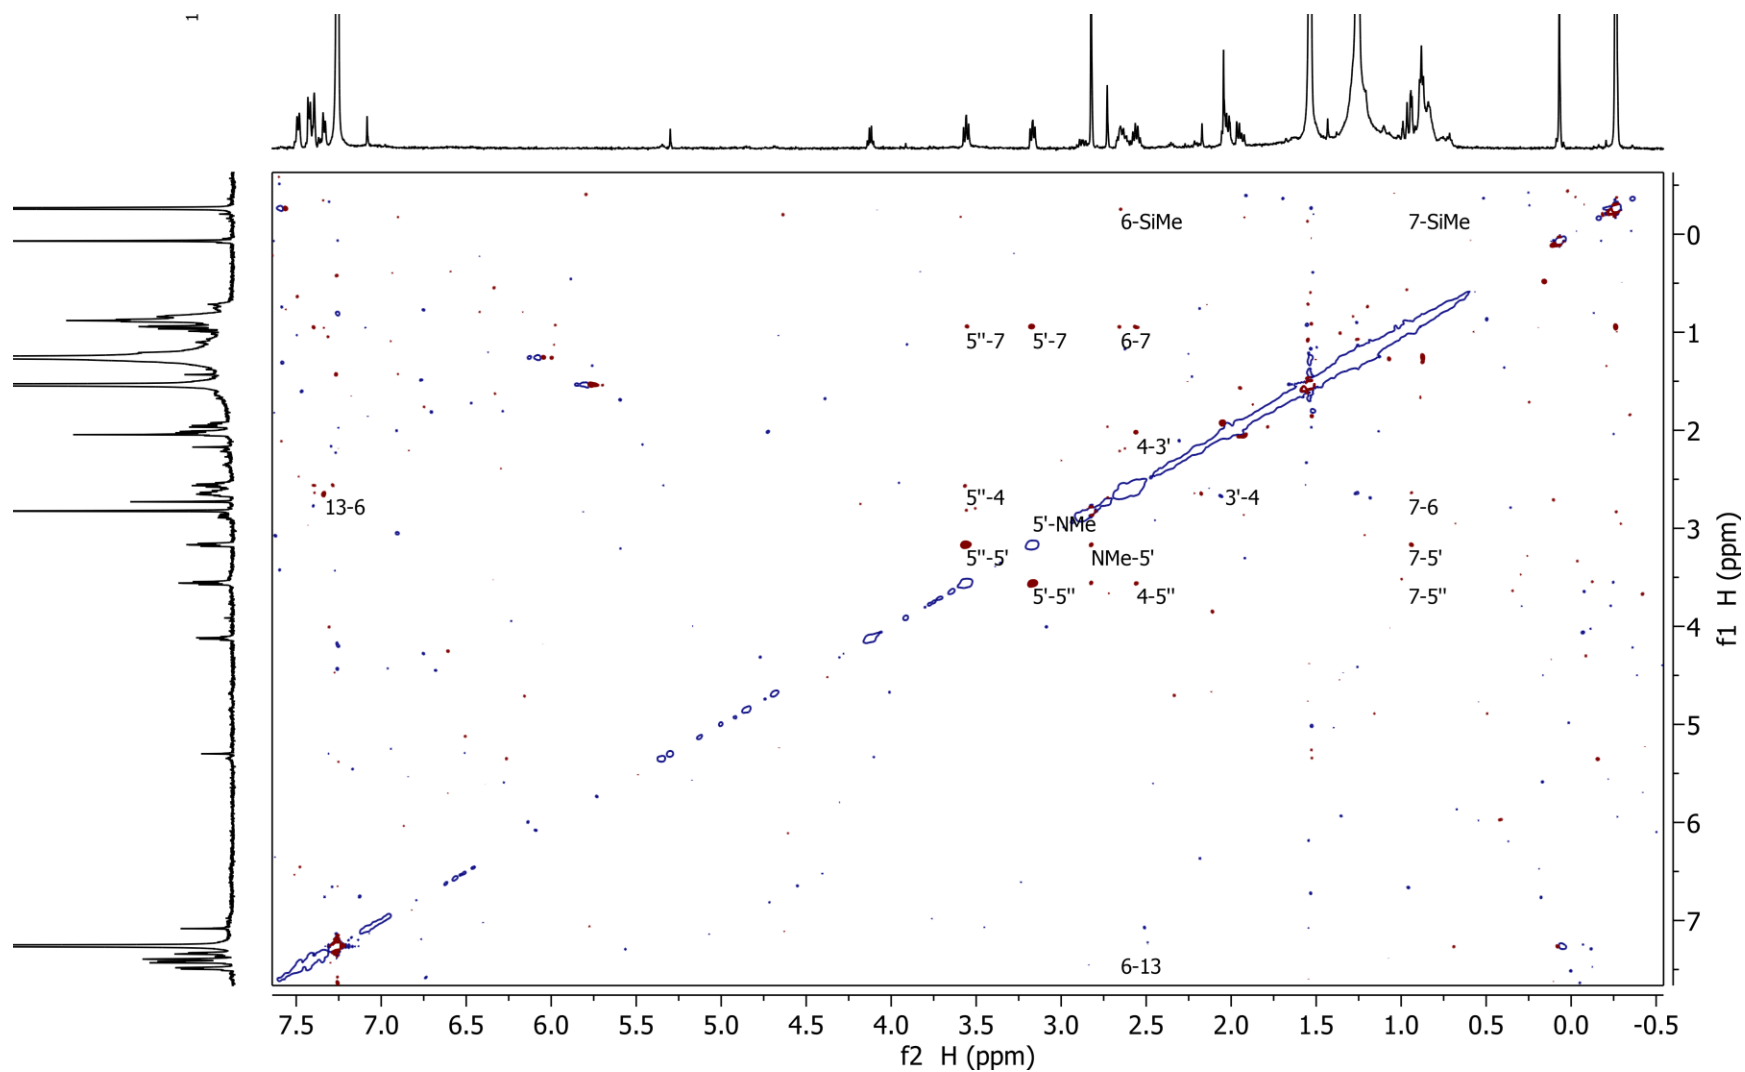

2D NOESY spectrum of XX acquired at 600 MHz at 25°C in CDCl<sub>3</sub> with 800 ms mixing time. The diagonal is phased down and displayed with a single blue contour level for clarity. Correlations are labelled with assignments.

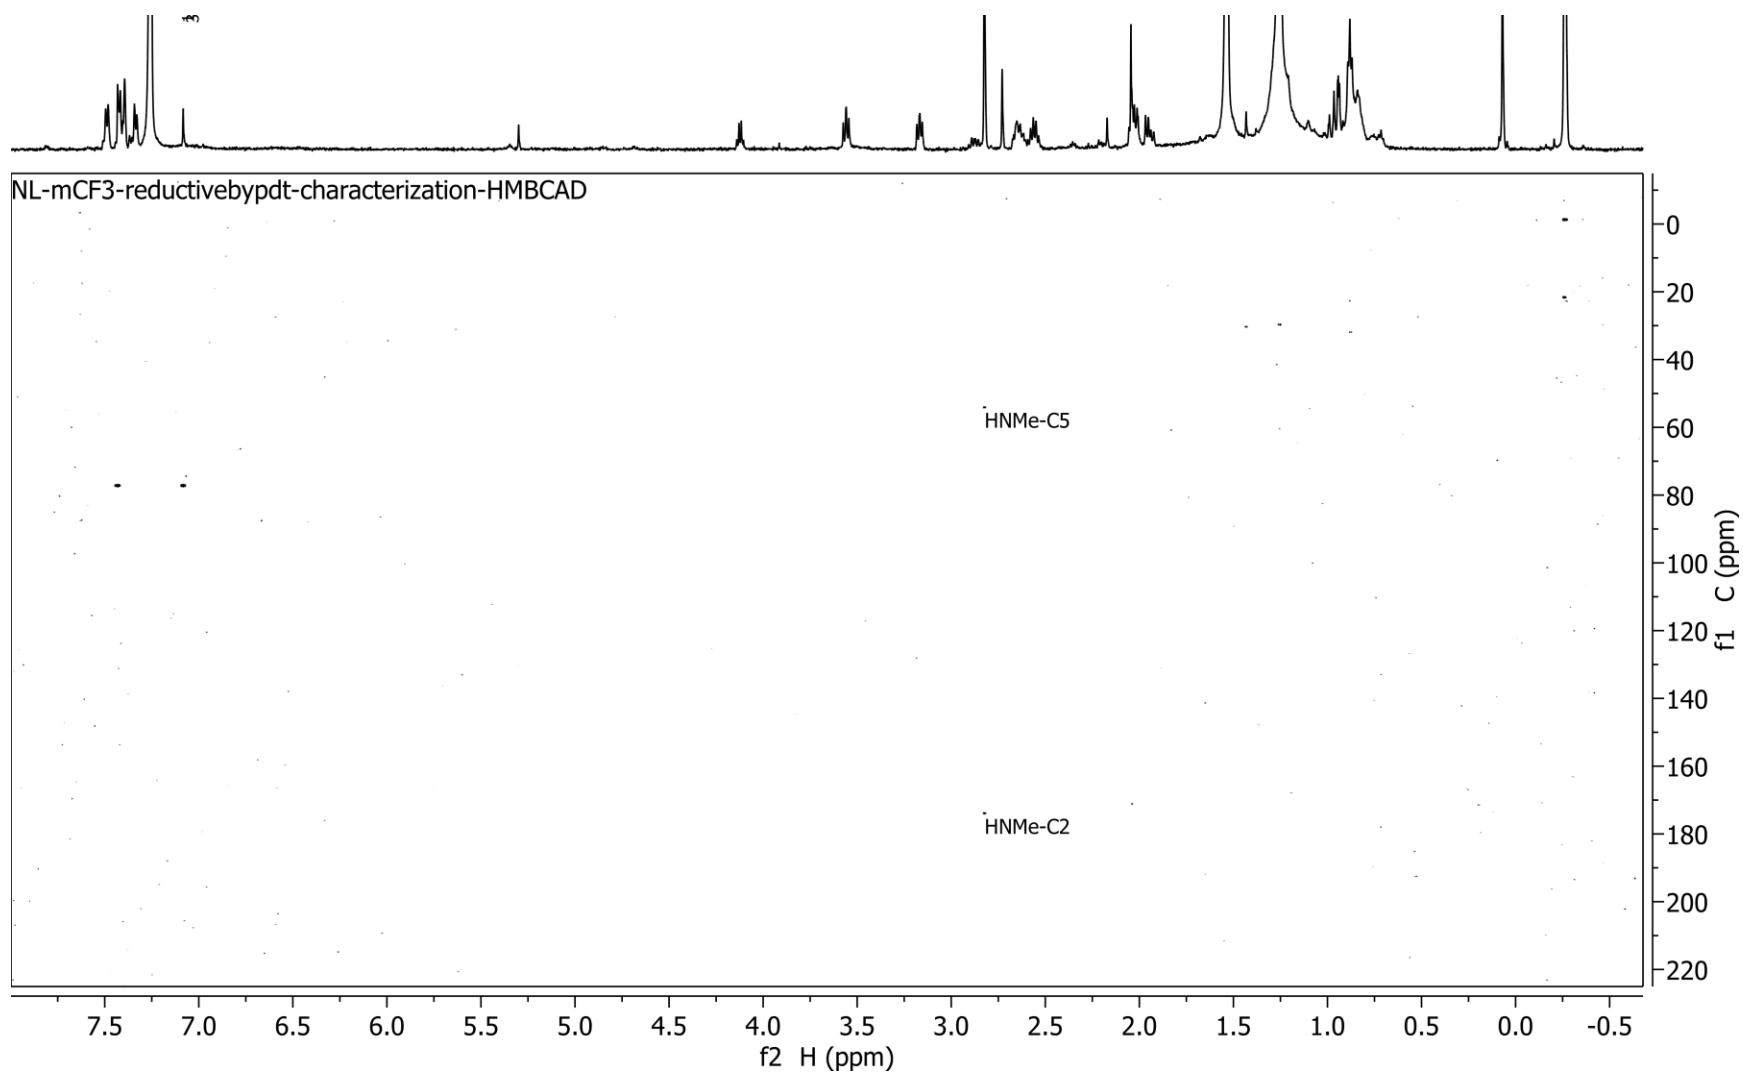

2D phase-sensitive  $^1\text{H}\{^{13}\text{C}\}$  HMBC spectrum of XX acquired at 600 MHz at 25C in  $\text{CDCl}_3$ . Labels indicate assignments.
